# Supplementary material for: Improved reference genome of the arboviral vector Aedes albopictus
Source: Genome Biol. 2020 Aug 26;21:215. doi: 10.1186/s13059-020-02141-w (PMC7448346; doi:10.1186/s13059-020-02141-w)
Supplement: Supplementary file 3 — Additional file 3: Metadata including the number of duplication times for 500 bp and 1000 bp flanking regions and the list of the genomic regions with putative artifact duplications. [file 13059_2020_2141_MOESM3_ESM.xlsx]

## Sheet: Resume
Additional file 3
List of the genomic regions with putative artifact duplications
Number of Duplications	3_500	3_1000		#Results	pairs
di-	540	329		#5'_1000bp flanking sequences	806
tri-	66	32		#3'_1000bp flanking sequences	808
tetra-	8	6		#5'_500bp flanking sequences	1329
penta-	3	4		#3'_500bp flanking sequences	1329
hexa-	4	0
hepta-	2	1
octa-	0	2
nona-	2	0		#Results	pairs
deca-	0	0		#3'_500bp flanking sequences	1329
undeca-	2	2		genes duplicated more than 2 times	248
dodeca-	1	1		genes duplicated 1 time	1081
				#Results	pairs
				#3'_1000bp flanking sequences	808
				genes duplicated more than 2 times	149
				genes duplicated 1 time	659

## Sheet: Twins_regions_3_1000bp
	Pos_1_gene_1	Pos_2_gene1
1	LOC109397473::NW_021838687.1:57118900-57119900	LOC109397475::NW_021838687.1:57126317-57127317
2	LOC109397503::NW_021838687.1:60344395-60345395	LOC109397481::NW_021838687.1:60351508-60352508
3	LOC109397504::NW_021838687.1:60343741-60344741	LOC109397494::NW_021838687.1:60350854-60351854
4	LOC109397037::NW_021838153.1:156537522-156538522	LOC109398598::NW_021838532.1:67798-68798
5	LOC109398729::NW_021839020.1:29913262-29914262	LOC109398673::NW_021839020.1:31388516-31389516
6	LOC109399267::NW_021838466.1:7586112-7587112	LOC109398598::NW_021838532.1:67798-68798
7	LOC109399330::NW_021837045.1:152957324-152958324	LOC109399335::NW_021837045.1:152957324-152958324
8	LOC109399533::NW_021838454.1:481038-482038	LOC109398113::NW_021838454.1:2886210-2887210
9	LOC109400382::NW_021838798.1:3473222-3474222	LOC109398400::NW_021838798.1:3711905-3712905
10	LOC109400689::NW_021838576.1:20245224-20246224	LOC109399383::NW_021838576.1:20832349-20833349
11	LOC109400736::NW_021839130.1:15085131-15086131	LOC109397127::NW_021839130.1:15650580-15651580
12	LOC109401649::NW_021838909.1:54415260-54416260	LOC109401648::NW_021838909.1:55414819-55415819
13	LOC109404276::NW_021838576.1:86679201-86680201	LOC109403127::NW_021838576.1:92793713-92794713
14	LOC109404302::NW_021838076.1:911404-912404	LOC109403098::NW_021838576.1:91880132-91881132
15	LOC109403124::NW_021838576.1:86273427-86274427	LOC109404336::NW_021838576.1:92584976-92585976
16	LOC109404520::NW_021838576.1:23392231-23393231	LOC109400638::NW_021838576.1:23400808-23401808
17	LOC109404521::NW_021838576.1:23392883-23393883	LOC109400639::NW_021838576.1:23401460-23402460
18	LOC109404569::NW_021838576.1:23386883-23387883	LOC109404523::NW_021838576.1:23395460-23396460
19	LOC109404592::NW_021838576.1:23329186-23330186	LOC109400638::NW_021838576.1:23400808-23401808
20	LOC109404650::NW_021837046.1:17784881-17785881	LOC109401431::NW_021837046.1:19212784-19213784
21	LOC109400357::NW_021838233.1:14319814-14320814	LOC109404969::NW_021838909.1:22880298-22881298
22	LOC109399598::NW_021837931.1:1636664-1637664	LOC109405327::NW_021837931.1:3659042-3660042
23	LOC109405344::NW_021838688.1:1659516-1660516	LOC109397804::NW_021838688.1:856656-857656
24	LOC109397817::NW_021838688.1:1865945-1866945	LOC109405354::NW_021838688.1:1053751-1054751
25	LOC109405455::NW_021837111.1:1153-2153	LOC109402413::NW_021837168.1:700307-701307
26	LOC109406116::NW_021837267.1:3951145-3952145	LOC109401743::NW_021837267.1:4654996-4655996
27	LOC109406122::NW_021837267.1:4278513-4279513	LOC109401744::NW_021837267.1:5065616-5066616
28	LOC109406132::NW_021837267.1:4444170-4445170	LOC109401764::NW_021837267.1:5190227-5191227
29	LOC109406348::NW_021838976.1:149770-150770	LOC109397614::NW_021839166.1:109668-110668
30	LOC109405301::NW_021838976.1:2371622-2372622	LOC109406359::NW_021838976.1:2660083-2661083
31	LOC109405312::NW_021838976.1:2273142-2274142	LOC109406383::NW_021838976.1:2581504-2582504
32	LOC109406517::NW_021837267.1:12186681-12187681	LOC109403312::NW_021838563.1:28019-29019
33	LOC109406987::NW_021838638.1:98517-99517	LOC109397888::NW_021838798.1:53861201-53862201
34	LOC109407066::NW_021837045.1:176293373-176294373	LOC109398985::NW_021838798.1:79129874-79130874
35	LOC109397477::NW_021838687.1:59376988-59377988	LOC109407175::NW_021838687.1:59391003-59392003
36	LOC109397491::NW_021838687.1:60341247-60342247	LOC109407180::NW_021838687.1:60348363-60349363
37	LOC109408410::NW_021837045.1:183401025-183402025	LOC109401042::NW_021837045.1:183952931-183953931
38	LOC109403044::NW_021838576.1:88678767-88679767	LOC109408667::NW_021838576.1:96931381-96932381
39	LOC109403058::NW_021838576.1:88615582-88616582	LOC109408669::NW_021838576.1:96882163-96883163
40	LOC109403082::NW_021838576.1:88591380-88592380	LOC109408671::NW_021838576.1:96864555-96865555
41	LOC109408676::NW_021838576.1:88478628-88479628	LOC109403048::NW_021838576.1:96764996-96765996
42	LOC109403053::NW_021838576.1:88532499-88533499	LOC109408692::NW_021838576.1:96820806-96821806
43	LOC109408775::NW_021838465.1:4325067-4326067	LOC109408774::NW_021838465.1:5424959-5425959
44	LOC109408802::NW_021838391.1:587504-588504	LOC109408804::NW_021838465.1:9056933-9057933
45	LOC109408897::NW_021838343.1:7721318-7722318	LOC109408236::NW_021839152.1:112310-113310
46	LOC109410424::NW_021837045.1:50581012-50582012	LOC109401462::NW_021837045.1:51275746-51276746
47	LOC109410440::NW_021837045.1:54801966-54802966	LOC109401457::NW_021838795.1:270510-271510
48	LOC109410465::NW_021837045.1:50450544-50451544	LOC109401485::NW_021837045.1:51179403-51180403
49	LOC109411083::NW_021837045.1:118830081-118831081	LOC109410903::NW_021837045.1:119254721-119255721
50	LOC109411089::NW_021838343.1:1871209-1872209	LOC109410268::NW_021838343.1:3705329-3706329
51	LOC109411109::NW_021837045.1:118785867-118786867	LOC109410905::NW_021837045.1:119205624-119206624
52	LOC109411128::NW_021838343.1:8927647-8928647	LOC109408195::NW_021839191.1:13049-14049
53	LOC109405810::NW_021837045.1:61511055-61512055	LOC109412341::NW_021838343.1:2945219-2946219
54	LOC109412539::NW_021838385.1:777793-778793	LOC109412590::NW_021838576.1:102759038-102760038
55	LOC109409534::NW_021838798.1:5076009-5077009	LOC109412988::NW_021838798.1:6326415-6327415
56	LOC109409468::NW_021838588.1:6191303-6192303	LOC109412989::NW_021838588.1:6633886-6634886
57	LOC109413111::NW_021838909.1:16756419-16757419	LOC109413112::NW_021838909.1:17710889-17711889
58	LOC109413165::NW_021837600.1:46946949-46947949	LOC109408146::NW_021839153.1:1227258-1228258
59	LOC109413177::NW_021838576.1:23261905-23262905	LOC109404563::NW_021838576.1:23270715-23271715
60	LOC109413189::NW_021838576.1:23263733-23264733	LOC109404553::NW_021838576.1:23272543-23273543
61	LOC109413199::NW_021838576.1:23248727-23249727	LOC109404564::NW_021838576.1:23270063-23271063
62	LOC109413239::NW_021838417.1:65412-66412	LOC109402166::NW_021838417.1:170798-171798
63	LOC109404546::NW_021838576.1:23267791-23268791	LOC109413299::NW_021838576.1:23276396-23277396
64	LOC109413197::NW_021838576.1:23254747-23255747	LOC109413299::NW_021838576.1:23276396-23277396
65	LOC109413309::NW_021838576.1:23355464-23356464	LOC109400638::NW_021838576.1:23400808-23401808
66	LOC109404534::NW_021838576.1:23337938-23338938	LOC109413309::NW_021838576.1:23355464-23356464
67	LOC109413378::NW_021837822.1:35589602-35590602	LOC109413358::NW_021837822.1:35682668-35683668
68	LOC109413554::NW_021837489.1:41439036-41440036	LOC109407903::NW_021837489.1:43947629-43948629
69	LOC109413581::NW_021837489.1:37706109-37707109	LOC109401225::NW_021837489.1:40859578-40860578
70	LOC109407929::NW_021838466.1:2120008-2121008	LOC109413857::NW_021838466.1:2592496-2593496
71	LOC109413859::NW_021838466.1:2133745-2134745	LOC109408070::NW_021838466.1:2609106-2610106
72	LOC109407934::NW_021838466.1:1903964-1904964	LOC109413869::NW_021839186.1:2107665-2108665
73	LOC109413987::NW_021837623.1:1239555-1240555	LOC109399190::NW_021838153.1:96828403-96829403
74	LOC109404233::NW_021838042.1:17304676-17305676	LOC109414032::NW_021838383.1:450933-451933
75	LOC109414034::NW_021838042.1:13471895-13472895	LOC109404241::NW_021838042.1:17326522-17327522
76	LOC109415098::NW_021837323.1:1085935-1086935	LOC109403000::NW_021837323.1:1225981-1226981
77	LOC109400859::NW_021837045.1:129080785-129081785	LOC109415500::NW_021837045.1:130068192-130069192
78	LOC109400807::NW_021837045.1:130448495-130449495	LOC109415509::NW_021837045.1:130752439-130753439
79	LOC109401332::NW_021837045.1:100928713-100929713	LOC109415782::NW_021837045.1:101770300-101771300
80	LOC109415911::NW_021837931.1:25505126-25506126	LOC109412644::NW_021837931.1:25685160-25686160
81	LOC109415927::NW_021837822.1:19887578-19888578	LOC109411505::NW_021837822.1:20350172-20351172
82	LOC109416077::NW_021837822.1:23859934-23860934	LOC109402947::NW_021837822.1:24480860-24481860
83	LOC109416112::NW_021837822.1:23735907-23736907	LOC109402910::NW_021837822.1:24339741-24340741
84	LOC109404996::NW_021837267.1:54520368-54521368	LOC109416158::NW_021837379.1:1024091-1025091
85	LOC109404975::NW_021837267.1:54235069-54236069	LOC109416160::NW_021837379.1:1027030-1028030
86	LOC109416185::NW_021837267.1:51251630-51252630	LOC109404461::NW_021837333.1:1826-2826
87	LOC109412350::NW_021837046.1:28240814-28241814	LOC109416190::NW_021837046.1:31155073-31156073
88	LOC109416591::NW_021837046.1:26194054-26195054	LOC109412354::NW_021837046.1:30483229-30484229
89	LOC109416680::NW_021838343.1:14623117-14624117	LOC109416493::NW_021838343.1:14739741-14740741
90	LOC109415608::NW_021839130.1:39194016-39195016	LOC109416911::NW_021839130.1:40011631-40012631
91	LOC109417710::NW_021838687.1:76290322-76291322	LOC109417761::NW_021838687.1:78014772-78015772
92	LOC109418548::NW_021838909.1:17736524-17737524	LOC109413113::NW_021839046.1:16076-17076
93	LOC109417077::NW_021838909.1:40111818-40112818	LOC109418811::NW_021838909.1:40245140-40246140
94	LOC109408461::NW_021837045.1:174703616-174704616	LOC109419338::NW_021837045.1:175136240-175137240
95	LOC109419636::NW_021837909.1:1215559-1216559	LOC109408505::NW_021838637.1:223170-224170
96	LOC109398225::NW_021838687.1:16819397-16820397	LOC109419776::NW_021838687.1:18506732-18507732
97	LOC109420208::NW_021838687.1:23496773-23497773	LOC109419765::NW_021838687.1:25260802-25261802
98	LOC109401673::NW_021838909.1:50496451-50497451	LOC109420344::NW_021838909.1:52466636-52467636
99	LOC109420362::NW_021838909.1:53955882-53956882	LOC109401661::NW_021838909.1:54971228-54972228
100	LOC109420419::NW_021838909.1:65542574-65543574	LOC109402331::NW_021838909.1:68323515-68324515
101	LOC109420424::NW_021838444.1:319041-320041	LOC109402341::NW_021838909.1:65384529-65385529
102	LOC109420464::NW_021837378.1:32216914-32217914	LOC109420463::NW_021837378.1:32221149-32222149
103	LOC109420465::NW_021837378.1:32212677-32213677	LOC109420463::NW_021837378.1:32221149-32222149
104	LOC109420466::NW_021837378.1:32208442-32209442	LOC109420463::NW_021837378.1:32221149-32222149
105	LOC109420474::NW_021837378.1:54885886-54886886	LOC109420483::NW_021837378.1:54890043-54891043
106	LOC109420486::NW_021837378.1:54894203-54895203	LOC109420483::NW_021837378.1:54890043-54891043
107	LOC109420492::NW_021838687.1:26023278-26024278	LOC109419733::NW_021838687.1:26931222-26932222
108	LOC109414117::NW_021838687.1:44520718-44521718	LOC109420686::NW_021838687.1:47436004-47437004
109	LOC109420738::NW_021838687.1:53206482-53207482	LOC109419942::NW_021838687.1:53842827-53843827
110	LOC109420740::NW_021838687.1:53224196-53225196	LOC109419944::NW_021838687.1:53856214-53857214
111	LOC109412534::NW_021838385.1:480593-481593	LOC109420836::NW_021838576.1:102434565-102435565
112	LOC109412541::NW_021838385.1:949979-950979	LOC109420845::NW_021838576.1:102862198-102863198
113	LOC109411065::NW_021838576.1:105317163-105318163	LOC109420861::NW_021838576.1:121292886-121293886
114	LOC109420863::NW_021838576.1:106460645-106461645	LOC109401007::NW_021838576.1:122842167-122843167
115	LOC109420936::NW_021837434.1:15429-16429	LOC109412651::NW_021838943.1:470446-471446
116	LOC109421150::NW_021838465.1:56980228-56981228	LOC109410579::NW_021838465.1:58047560-58048560
117	LOC109421161::NW_021838465.1:56936506-56937506	LOC109410561::NW_021838465.1:57992113-57993113
118	LOC109410563::NW_021838465.1:56904463-56905463	LOC109421163::NW_021838465.1:57964908-57965908
119	LOC109421170::NW_021838787.1:311592-312592	LOC109410820::NW_021838395.1:900772-901772
120	LOC109421242::NW_021838787.1:328597-329597	LOC109410819::NW_021838395.1:916074-917074
121	LOC109421820::NW_021837156.1:21129891-21130891	LOC109421825::NW_021837156.1:27735140-27736140
122	LOC109421903::NW_021837489.1:1286296-1287296	LOC109408615::NW_021837489.1:3135108-3136108
123	LOC109417184::NW_021838200.1:418327-419327	LOC109422424::NW_021838909.1:90186312-90187312
124	LOC109422425::NW_021838909.1:88605472-88606472	LOC109417180::NW_021838909.1:89484151-89485151
125	LOC109417180::NW_021838909.1:89484151-89485151	LOC109422440::NW_021838909.1:89852380-89853380
126	LOC109422444::NW_021838909.1:88271230-88272230	LOC109400000::NW_021838909.1:89560459-89561459
127	LOC109422687::NW_021838154.1:23191423-23192423	LOC109401128::NW_021838599.1:2353681-2354681
128	LOC109422764::NW_021837156.1:20620769-20621769	LOC109421828::NW_021837156.1:21130926-21131926
129	LOC109422769::NW_021837156.1:22228366-22229366	LOC109421845::NW_021837156.1:28590711-28591711
130	LOC109422780::NW_021837156.1:21156502-21157502	LOC109421834::NW_021837156.1:27766536-27767536
131	LOC109423072::NW_021837445.1:1558-2558	LOC109405778::NW_021838687.1:20194091-20195091
132	LOC109423244::NW_021837323.1:1354726-1355726	LOC109408245::NW_021838632.1:142947-143947
133	LOC109402464::NW_021837822.1:809345-810345	LOC109423578::NW_021838434.1:94665-95665
134	LOC109423727::NW_021838465.1:56731371-56732371	LOC109423728::NW_021838576.1:28433459-28434459
135	LOC109408595::NW_021838576.1:54566786-54567786	LOC109423828::NW_021838576.1:55251703-55252703
136	LOC109423910::NW_021838153.1:152002698-152003698	LOC109404787::NW_021838153.1:153831263-153832263
137	LOC109423916::NW_021838153.1:152097812-152098812	LOC109404805::NW_021838153.1:153924652-153925652
138	LOC109424015::NW_021838154.1:4256196-4257196	LOC109416410::NW_021838154.1:6259157-6260157
139	LOC109422366::NW_021838403.1:513384-514384	LOC109424462::NW_021839208.1:1248765-1249765
140	LOC109424810::NW_021837822.1:33476607-33477607	LOC109414634::NW_021837976.1:191328-192328
141	LOC109424851::NW_021837822.1:30038952-30039952	LOC109414593::NW_021837822.1:31309655-31310655
142	LOC109400338::NW_021838042.1:5349315-5350315	LOC109425186::NW_021838042.1:5763567-5764567
143	LOC109425942::NW_021838465.1:129847731-129848731	LOC109407618::NW_021838465.1:133258456-133259456
144	LOC109426146::NW_021837045.1:13330409-13331409	LOC109418415::NW_021837045.1:15923377-15924377
145	LOC109398096::NW_021838856.1:209116-210116	LOC109426171::NW_021838454.1:5904739-5905739
146	LOC109410282::NW_021838567.1:189203-190203	LOC109426252::NW_021838597.1:220534-221534
147	LOC109410291::NW_021838567.1:365740-366740	LOC109426262::NW_021838597.1:358436-359436
148	LOC109410292::NW_021838567.1:331347-332347	LOC109426263::NW_021838597.1:330114-331114
149	LOC109417786::NW_021838153.1:10845002-10846002	LOC109426688::NW_021838153.1:12775589-12776589
150	LOC109417792::NW_021838153.1:10755873-10756873	LOC109426691::NW_021838153.1:12686502-12687502
151	LOC109417868::NW_021838153.1:3262524-3263524	LOC109426825::NW_021838153.1:4626572-4627572
152	LOC109426840::NW_021838153.1:930133-931133	LOC109417952::NW_021838153.1:1874247-1875247
153	LOC109413653::NW_021837867.1:14193-15193	LOC109426889::NW_021838643.1:5870206-5871206
154	LOC109426888::NW_021838991.1:76892-77892	LOC109426889::NW_021838643.1:5870206-5871206
155	LOC109427094::NW_021837045.1:88506817-88507817	LOC109400195::NW_021837045.1:91880777-91881777
156	LOC109427121::NW_021837045.1:88267851-88268851	LOC109400194::NW_021837045.1:90201373-90202373
157	LOC109411624::NW_021837123.1:458858-459858	LOC109427260::NW_021837267.1:34862363-34863363
158	LOC109427301::NW_021837045.1:7344978-7345978	LOC109418332::NW_021837045.1:8748714-8749714
159	LOC109414720::NW_021838153.1:24582355-24583355	LOC109427302::NW_021838153.1:25587443-25588443
160	LOC109414739::NW_021838153.1:24429746-24430746	LOC109427362::NW_021838419.1:829248-830248
161	LOC109428133::NW_021837123.1:1766468-1767468	LOC109411640::NW_021837123.1:1480903-1481903
162	LOC109428484::NW_021838798.1:63511262-63512262	LOC109412976::NW_021838798.1:64323710-64324710
163	LOC109428600::NW_021838798.1:59939375-59940375	LOC109416950::NW_021838898.1:2896924-2897924
164	LOC109416959::NW_021837136.1:29819-30819	LOC109428600::NW_021838798.1:59939375-59940375
165	LOC109424276::NW_021837634.1:366946-367946	LOC109428705::NW_021838576.1:81990446-81991446
166	LOC109424533::NW_021838554.1:4918092-4919092	LOC109428758::NW_021838719.1:89971-90971
167	LOC109428787::NW_021837223.1:61896-62896	LOC109405081::NW_021838554.1:2934716-2935716
168	LOC109428946::NW_021838465.1:7255275-7256275	LOC109408734::NW_021838465.1:11148624-11149624
169	LOC109408740::NW_021838465.1:6867518-6868518	LOC109428952::NW_021838465.1:10791947-10792947
170	LOC109398784::NW_021837267.1:31332136-31333136	LOC109429154::NW_021837267.1:32117517-32118517
171	LOC109398801::NW_021837267.1:24751612-24752612	LOC109429182::NW_021837267.1:28343199-28344199
172	LOC109398783::NW_021837267.1:19686737-19687737	LOC109429211::NW_021837267.1:23427146-23428146
173	LOC109425117::NW_021838399.1:11835632-11836632	LOC109429380::NW_021838399.1:12753741-12754741
174	LOC109429425::NW_021838042.1:2147170-2148170	LOC109425148::NW_021838042.1:3787491-3788491
175	LOC109429459::NW_021838687.1:36379297-36380297	LOC109420651::NW_021838687.1:42266797-42267797
176	LOC109406840::NW_021837045.1:39132766-39133766	LOC109429498::NW_021837045.1:43778502-43779502
177	LOC109429586::NW_021837378.1:8420327-8421327	LOC109408551::NW_021838031.1:36226-37226
178	LOC109408549::NW_021837378.1:8490579-8491579	LOC109429717::NW_021838031.1:111704-112704
179	LOC109429844::NW_021837378.1:30031668-30032668	LOC109398308::NW_021838387.1:324779-325779
180	LOC109430007::NW_021838432.1:8281428-8282428	LOC109416386::NW_021838432.1:9836149-9837149
181	LOC109414744::NW_021838432.1:8701280-8702280	LOC109430018::NW_021838432.1:10251080-10252080
182	LOC109416369::NW_021838432.1:6437062-6438062	LOC109430044::NW_021838432.1:7508022-7509022
183	LOC109430219::NW_021838909.1:2467668-2468668	LOC109410077::NW_021838909.1:3856558-3857558
184	LOC109430515::NW_021838405.1:875236-876236	LOC109428430::NW_021838798.1:68492031-68493031
185	LOC109430611::NW_021838576.1:68271822-68272822	LOC109423808::NW_021838576.1:69185992-69186992
186	LOC109430697::NW_021837489.1:14208978-14209978	LOC109405778::NW_021838687.1:20194091-20195091
187	LOC109423072::NW_021837445.1:1558-2558	LOC109430697::NW_021837489.1:14208978-14209978
188	LOC109424156::NW_021837600.1:15916083-15917083	LOC109430835::NW_021837600.1:16494021-16495021
189	LOC109430882::NW_021838542.1:552871-553871	LOC109427356::NW_021838603.1:449224-450224
190	LOC109412105::NW_021838542.1:481188-482188	LOC109430926::NW_021838603.1:362919-363919
191	LOC109412112::NW_021838542.1:355088-356088	LOC109430953::NW_021838603.1:245044-246044
192	LOC109431002::NW_021838042.1:13767424-13768424	LOC109404231::NW_021838042.1:17640225-17641225
193	LOC109412120::NW_021838542.1:205980-206980	LOC109431022::NW_021838603.1:50847-51847
194	LOC109424962::NW_021837256.1:213075-214075	LOC109431083::NW_021837256.1:1110034-1111034
195	LOC109415837::NW_021838798.1:80574487-80575487	LOC109431177::NW_021838798.1:92689520-92690520
196	LOC109427757::NW_021837156.1:49677537-49678537	LOC109431346::NW_021837156.1:51290319-51291319
197	LOC109431537::NW_021838909.1:90292353-90293353	LOC109422419::NW_021838909.1:90666420-90667420
198	LOC109430942::NW_021838443.1:5838874-5839874	LOC109431686::NW_021839086.1:1430902-1431902
199	LOC109431693::NW_021838443.1:424911-425911	LOC109398056::NW_021838443.1:9685583-9686583
200	LOC109398072::NW_021838454.1:7060675-7061675	LOC109431710::NW_021838454.1:9294102-9295102
201	LOC109403972::NW_021837822.1:36043123-36044123	LOC109432032::NW_021837822.1:38800606-38801606
202	LOC109427086::NW_021837489.1:1796350-1797350	LOC109432083::NW_021838909.1:49577520-49578520
203	LOC109430369::NW_021838884.1:50594-51594	LOC109432116::NW_021838909.1:4818308-4819308
204	LOC109404935::NW_021837156.1:58900723-58901723	LOC109432117::NW_021838798.1:72387248-72388248
205	LOC109432507::NW_021837248.1:2295-3295	LOC109421387::NW_021838153.1:117643294-117644294
206	LOC109432535::NW_021838153.1:117793679-117794679	LOC109421448::NW_021838153.1:124806533-124807533
207	LOC109421440::NW_021838153.1:117970336-117971336	LOC109432537::NW_021838153.1:124978541-124979541
208	LOC109421451::NW_021838153.1:117740683-117741683	LOC109432557::NW_021838153.1:124757425-124758425
209	LOC109432562::NW_021838153.1:117795702-117796702	LOC109421447::NW_021838153.1:124811954-124812954
210	LOC109432569::NW_021838153.1:117973274-117974274	LOC109421437::NW_021838153.1:124981490-124982490
211	LOC109421435::NW_021838153.1:117992342-117993342	LOC109432573::NW_021838153.1:124988223-124989223
212	LOC109432765::NW_021838776.1:4203672-4204672	LOC109407890::NW_021838776.1:4336856-4337856
213	LOC109432845::NW_021837267.1:53369750-53370750	LOC109416636::NW_021837267.1:56003871-56004871
214	LOC109419927::NW_021838576.1:28834763-28835763	LOC109432869::NW_021837845.1:978127-979127
215	LOC109433069::NW_021839032.1:172944-173944	LOC109404652::NW_021839230.1:126293-127293
216	LOC109404663::NW_021839032.1:152122-153122	LOC109433130::NW_021839230.1:92364-93364
217	LOC109433206::NW_021838909.1:62047340-62048340	LOC109402290::NW_021838909.1:71238634-71239634
218	LOC109433264::NW_021837046.1:55028064-55029064	LOC109424282::NW_021837046.1:55431916-55432916
219	LOC109410673::NW_021838465.1:99074090-99075090	LOC109433510::NW_021838465.1:99087216-99088216
220	LOC109412587::NW_021839130.1:16776524-16777524	LOC109433602::NW_021839130.1:17984724-17985724
221	LOC109621263::NW_021838042.1:15364713-15365713	LOC109404201::NW_021838042.1:19249253-19250253
222	LOC109621273::NW_021838465.1:70221694-70222694	LOC109425587::NW_021838465.1:72801881-72802881
223	LOC109405048::NW_021837045.1:160078042-160079042	LOC109621306::NW_021837045.1:162222000-162223000
224	LOC109621310::NW_021838153.1:78495251-78496251	LOC109408584::NW_021838514.1:161920-162920
225	LOC109621320::NW_021838465.1:88711404-88712404	LOC109431564::NW_021838693.1:366304-367304
226	LOC109430841::NW_021837931.1:10044787-10045787	LOC109621615::NW_021839020.1:18883847-18884847
227	LOC109400054::NW_021837083.1:83792-84792	LOC109621621::NW_021838610.1:3672035-3673035
228	LOC109400053::NW_021837083.1:106389-107389	LOC109621622::NW_021838610.1:3701238-3702238
229	LOC109621651::NW_021838576.1:23249379-23250379	LOC109404563::NW_021838576.1:23270715-23271715
230	LOC109621652::NW_021838576.1:24492641-24493641	LOC109400638::NW_021838576.1:23400808-23401808
231	LOC109621653::NW_021838401.1:956136-957136	LOC109404547::NW_021838576.1:23305283-23306283
232	LOC109621663::NW_021838401.1:966407-967407	LOC109404547::NW_021838576.1:23305283-23306283
233	LOC109621653::NW_021838401.1:956136-957136	LOC109621663::NW_021838401.1:966407-967407
234	LOC109621654::NW_021838401.1:956788-957788	LOC109621825::NW_021838576.1:23305935-23306935
235	LOC109621915::NW_021837489.1:16186879-16187879	LOC109397422::NW_021837489.1:17748507-17749507
236	LOC109417987::NW_021838466.1:6721329-6722329	LOC109621925::NW_021838466.1:7262012-7263012
237	LOC109621931::NW_021838466.1:6857815-6858815	LOC109417993::NW_021838466.1:7369983-7370983
238	LOC109622250::NW_021838233.1:2458985-2459985	LOC109414432::NW_021838233.1:9593388-9594388
239	LOC109414455::NW_021838233.1:5978295-5979295	LOC109622262::NW_021838233.1:8370708-8371708
240	LOC109622269::NW_021838233.1:5707629-5708629	LOC109414464::NW_021838233.1:8073432-8074432
241	LOC109416440::NW_021837045.1:164908259-164909259	LOC109622371::NW_021838410.1:12230314-12231314
242	LOC109414426::NW_021838233.1:9670202-9671202	LOC109622534::NW_021838508.1:629852-630852
243	LOC109429250::NW_021837045.1:19696572-19697572	LOC109622686::NW_021838684.1:416408-417408
244	LOC109622706::NW_021838562.1:200915-201915	LOC109419960::NW_021838562.1:217736-218736
245	LOC109422857::NW_021838665.1:2253770-2254770	LOC109622707::NW_021838665.1:3420469-3421469
246	LOC109417991::NW_021838466.1:6824308-6825308	LOC109622784::NW_021838466.1:7350419-7351419
247	LOC109622914::NW_021838153.1:143409715-143410715	LOC109419927::NW_021838576.1:28834763-28835763
248	LOC109433293::NW_021838681.1:356303-357303	LOC109623165::NW_021838909.1:65427974-65428974
249	LOC115253425::NW_021838576.1:106463686-106464686	LOC109401008::NW_021838576.1:122845211-122846211
250	LOC115253439::NW_021837878.1:48287-49287	LOC109402206::NW_021838421.1:4806887-4807887
251	LOC115253442::NW_021838646.1:147048-148048	LOC109400309::NW_021838712.1:141933-142933
252	LOC115253475::NW_021837083.1:71071-72071	LOC109621269::NW_021838610.1:3659611-3660611
253	LOC109407510::NW_021838687.1:27545943-27546943	LOC115253476::NW_021838711.1:271900-272900
254	LOC109400409::NW_021837316.1:18552-19552	LOC115253495::NW_021839130.1:64744724-64745724
255	LOC115253502::NW_021838736.1:46961-47961	LOC109421066::NW_021839020.1:61928520-61929520
256	LOC109422424::NW_021838909.1:90186312-90187312	LOC115253551::NW_021838909.1:90609794-90610794
257	LOC115253592::NW_021838576.1:100828986-100829986	LOC109420811::NW_021838910.1:2556334-2557334
258	LOC115253602::NW_021837267.1:27360120-27361120	LOC109429157::NW_021837267.1:30824427-30825427
259	LOC109429778::NW_021838153.1:110798950-110799950	LOC115253614::NW_021838925.1:146762-147762
260	LOC109407409::NW_021837600.1:29495965-29496965	LOC115253630::NW_021837600.1:36425133-36426133
261	LOC109418647::NW_021837156.1:40483867-40484867	LOC115253646::NW_021837156.1:40552622-40553622
262	LOC109397804::NW_021838688.1:856656-857656	LOC115253654::NW_021838688.1:2794595-2795595
263	LOC109398046::NW_021837149.1:8917-9917	LOC115253668::NW_021838454.1:7781301-7782301
264	LOC115253670::NW_021838798.1:44224035-44225035	LOC109427533::NW_021838798.1:45261943-45262943
265	LOC109411639::NW_021837123.1:1589583-1590583	LOC115253690::NW_021837123.1:1883029-1884029
266	LOC109428129::NW_021837267.1:37144480-37145480	LOC115253690::NW_021837123.1:1883029-1884029
267	LOC115253700::NW_021838687.1:22910113-22911113	LOC109419759::NW_021838687.1:24693607-24694607
268	LOC115253702::NW_021838153.1:152136305-152137305	LOC109423917::NW_021838153.1:153954445-153955445
269	LOC115253717::NW_021837489.1:41409153-41410153	LOC109407901::NW_021837489.1:43920146-43921146
270	LOC109408342::NW_021838465.1:74605540-74606540	LOC115253736::NW_021838465.1:75971852-75972852
271	LOC109399713::NW_021837711.1:40728745-40729745	LOC115253738::NW_021837711.1:45632961-45633961
272	LOC109427925::NW_021838233.1:13469556-13470556	LOC115253749::NW_021838233.1:17536480-17537480
273	LOC115253750::NW_021838233.1:17231415-17232415	LOC115253749::NW_021838233.1:17536480-17537480
274	LOC109427070::NW_021837045.1:66336107-66337107	LOC115253766::NW_021837045.1:66859165-66860165
275	LOC115253778::NW_021838909.1:11791280-11792280	LOC109413081::NW_021838909.1:13041462-13042462
276	LOC115253661::NW_021838687.1:77270769-77271769	LOC115253783::NW_021838687.1:78719176-78720176
277	LOC109400192::NW_021837045.1:87968092-87969092	LOC115253789::NW_021837045.1:89920416-89921416
278	LOC115253820::NW_021838233.1:2100349-2101349	LOC109622253::NW_021838233.1:9295303-9296303
279	LOC109430913::NW_021837600.1:9482664-9483664	LOC115253853::NW_021837600.1:11430998-11431998
280	LOC115253911::NW_021838688.1:884949-885949	LOC109405348::NW_021838688.1:2834321-2835321
281	LOC115253927::NW_021838621.1:5099847-5100847	LOC109426368::NW_021838865.1:232171-233171
282	LOC109419080::NW_021838586.1:392145-393145	LOC115253928::NW_021838632.1:4109174-4110174
283	LOC109420559::NW_021838595.1:517670-518670	LOC115253937::NW_021838687.1:45100146-45101146
284	LOC109403808::NW_021838465.1:50348375-50349375	LOC115253953::NW_021838712.1:14006-15006
285	LOC115253987::NW_021838909.1:45677825-45678825	LOC109622970::NW_021838909.1:46403866-46404866
286	LOC109622882::NW_021837046.1:44627771-44628771	LOC115254005::NW_021837046.1:45118766-45119766
287	LOC115254008::NW_021837046.1:49135812-49136812	LOC109428226::NW_021838233.1:14453375-14454375
288	LOC115253667::NW_021837489.1:32788226-32789226	LOC115254011::NW_021839011.1:144985-145985
289	LOC115254017::NW_021839020.1:18296353-18297353	LOC109621501::NW_021839020.1:18926093-18927093
290	LOC115254025::NW_021839020.1:29177985-29178985	LOC109404870::NW_021839020.1:29506988-29507988
291	LOC115254049::NW_021837156.1:21490363-21491363	LOC109422772::NW_021837156.1:28068939-28069939
292	LOC109427762::NW_021837156.1:49574335-49575335	LOC115254055::NW_021837156.1:51176562-51177562
293	LOC109410890::NW_021837045.1:122919780-122920780	LOC115254065::NW_021837045.1:124575401-124576401
294	LOC109411640::NW_021837123.1:1480903-1481903	LOC115254071::NW_021837267.1:37012648-37013648
295	LOC109427239::NW_021837267.1:36170736-36171736	LOC115254073::NW_021837267.1:38701914-38702914
296	LOC115254074::NW_021837267.1:39680741-39681741	LOC109427211::NW_021837267.1:44206118-44207118
297	LOC109406325::NW_021837267.1:45437452-45438452	LOC115254078::NW_021837267.1:46520338-46521338
298	LOC109402036::NW_021837711.1:44961379-44962379	LOC115254114::NW_021837711.1:45182059-45183059
299	LOC109414597::NW_021837822.1:30005795-30006795	LOC115254116::NW_021837822.1:31292855-31293855
300	LOC115254141::NW_021838042.1:5455129-5456129	LOC109425181::NW_021838042.1:5886672-5887672
301	LOC115254184::NW_021838432.1:7909050-7910050	LOC109416360::NW_021838432.1:9507392-9508392
302	LOC115254198::NW_021838465.1:50780897-50781897	LOC109405470::NW_021838887.1:2201322-2202322
303	LOC115254243::NW_021838576.1:15381769-15382769	LOC109402733::NW_021838576.1:17621417-17622417
304	LOC115254261::NW_021838576.1:98594516-98595516	LOC109408640::NW_021838576.1:113728665-113729665
305	LOC109419874::NW_021838595.1:240400-241400	LOC115254266::NW_021838595.1:258039-259039
306	LOC115254293::NW_021838609.1:22602-23602	LOC109397264::NW_021838632.1:313255-314255
307	LOC115254310::NW_021838610.1:6101671-6102671	LOC109429803::NW_021838645.1:312846-313846
308	LOC115254485::NW_021838624.1:222745-223745	LOC109427440::NW_021838798.1:22203183-22204183
309	LOC115254517::NW_021838628.1:481966-482966	LOC109427421::NW_021838798.1:21246290-21247290
310	LOC109423210::NW_021838406.1:213505-214505	LOC115254535::NW_021838632.1:1260955-1261955
311	LOC115254603::NW_021838643.1:3210185-3211185	LOC115254604::NW_021838643.1:3213144-3214144
312	LOC115254659::NW_021838654.1:1947676-1948676	LOC115254660::NW_021838654.1:2009144-2010144
313	LOC109424441::NW_021838654.1:2573076-2574076	LOC115254683::NW_021838654.1:3842661-3843661
314	LOC109422853::NW_021838665.1:2239278-2240278	LOC115254779::NW_021838665.1:3413851-3414851
315	LOC109422854::NW_021838665.1:2237725-2238725	LOC115254780::NW_021838665.1:3412297-3413297
316	LOC109407442::NW_021837600.1:36010121-36011121	LOC115254860::NW_021838682.1:64818-65818
317	LOC115254888::NW_021838687.1:57116613-57117613	LOC109397483::NW_021838687.1:57124020-57125020
318	LOC115254911::NW_021838687.1:78084070-78085070	LOC109417706::NW_021838687.1:79965711-79966711
319	LOC109428093::NW_021838404.1:199054-200054	LOC115254947::NW_021838687.1:3160081-3161081
320	LOC109419911::NW_021838443.1:9256984-9257984	LOC115254960::NW_021838687.1:6319322-6320322
321	LOC115254972::NW_021838687.1:12657911-12658911	LOC115254988::NW_021838687.1:13913922-13914922
322	LOC115255017::NW_021838687.1:21213082-21214082	LOC109419754::NW_021838687.1:22698060-22699060
323	LOC115253936::NW_021838687.1:23542941-23543941	LOC115255044::NW_021838687.1:25331725-25332725
324	LOC109407425::NW_021838687.1:28071317-28072317	LOC115255051::NW_021838687.1:28644763-28645763
325	LOC115255129::NW_021838687.1:46766954-46767954	LOC115255131::NW_021838687.1:46775127-46776127
326	LOC115255161::NW_021838687.1:53195096-53196096	LOC109420569::NW_021838687.1:53831793-53832793
327	LOC115255181::NW_021838687.1:57114672-57115672	LOC115255182::NW_021838687.1:57122079-57123079
328	LOC109397482::NW_021838687.1:57114018-57115018	LOC115255183::NW_021838687.1:57121425-57122425
329	LOC109397487::NW_021838687.1:57128842-57129842	LOC115255183::NW_021838687.1:57121425-57122425
330	LOC109397485::NW_021838687.1:59372426-59373426	LOC115255205::NW_021838687.1:59379429-59380429
331	LOC109397477::NW_021838687.1:59376988-59377988	LOC115255206::NW_021838687.1:59383990-59384990
332	LOC115255206::NW_021838687.1:59383990-59384990	LOC109407175::NW_021838687.1:59391003-59392003
333	LOC109397478::NW_021838687.1:59380083-59381083	LOC115255207::NW_021838687.1:59387083-59388083
334	LOC109397485::NW_021838687.1:59372426-59373426	LOC115255208::NW_021838687.1:59386429-59387429
335	LOC115255205::NW_021838687.1:59379429-59380429	LOC115255208::NW_021838687.1:59386429-59387429
336	LOC115255201::NW_021838687.1:59355137-59356137	LOC115255221::NW_021838687.1:60368983-60369983
337	LOC115255223::NW_021838687.1:60366193-60367193	LOC109407186::NW_021838687.1:60373292-60374292
338	LOC115255230::NW_021838687.1:60873211-60874211	LOC109415073::NW_021838687.1:61316609-61317609
339	LOC109417757::NW_021838687.1:69379766-69380766	LOC115255285::NW_021838687.1:69667657-69668657
340	LOC109417758::NW_021838687.1:69373815-69374815	LOC115255289::NW_021838687.1:69661692-69662692
341	LOC115255328::NW_021838687.1:77288393-77289393	LOC109417702::NW_021838687.1:78730038-78731038
342	LOC115255345::NW_021838687.1:78504076-78505076	LOC109417706::NW_021838687.1:79965711-79966711
343	LOC115255431::NW_021838687.1:28083208-28084208	LOC109407410::NW_021838687.1:28665919-28666919
344	LOC115255204::NW_021838687.1:59375003-59376003	LOC115255469::NW_021838687.1:59382006-59383006
345	LOC115255209::NW_021838687.1:59389006-59390006	LOC115255469::NW_021838687.1:59382006-59383006
346	LOC109410239::NW_021838687.1:93164552-93165552	LOC115255525::NW_021838687.1:99030974-99031974
347	LOC109416200::NW_021838687.1:7937166-7938166	LOC115255534::NW_021838687.1:8331903-8332903
348	LOC115255622::NW_021838688.1:870989-871989	LOC109405346::NW_021838688.1:2820744-2821744
349	LOC109405342::NW_021838688.1:1305702-1306702	LOC115255641::NW_021838688.1:2063774-2064774
350	LOC115255642::NW_021838688.1:2613429-2614429	LOC109405351::NW_021838688.1:649542-650542
351	LOC109405354::NW_021838688.1:1053751-1054751	LOC115255646::NW_021838688.1:2952194-2953194
352	LOC109413635::NW_021837600.1:18703564-18704564	LOC115255658::NW_021838688.1:831796-832796
353	LOC115255686::NW_021838694.1:76493-77493	LOC109402290::NW_021838909.1:71238634-71239634
354	LOC109412205::NW_021838699.1:1172032-1173032	LOC115255706::NW_021838699.1:1238183-1239183
355	LOC109403694::NW_021838721.1:2425950-2426950	LOC115255897::NW_021838721.1:2348190-2349190
356	LOC115255379::NW_021838687.1:82914112-82915112	LOC115256013::NW_021838743.1:3133194-3134194
357	LOC109408992::NW_021838743.1:24055-25055	LOC115256017::NW_021838743.1:3939367-3940367
358	LOC109414079::NW_021838754.1:318617-319617	LOC115256087::NW_021838754.1:889234-890234
359	LOC109414080::NW_021838754.1:355252-356252	LOC115256088::NW_021838754.1:917927-918927
360	LOC115256057::NW_021838753.1:248506-249506	LOC115256168::NW_021838765.1:3387948-3388948
361	LOC109410820::NW_021838395.1:900772-901772	LOC115256255::NW_021838787.1:172742-173742
362	LOC109410819::NW_021838395.1:916074-917074	LOC115256256::NW_021838787.1:184056-185056
363	LOC115256404::NW_021838798.1:61031189-61032189	LOC109428498::NW_021838798.1:61043302-61044302
364	LOC109411294::NW_021837046.1:8706229-8707229	LOC115256606::NW_021837046.1:9489667-9490667
365	LOC115256618::NW_021837046.1:9849951-9850951	LOC115255630::NW_021838688.1:1327859-1328859
366	LOC115256674::NW_021838798.1:23630628-23631628	LOC115256547::NW_021838798.1:23634353-23635353
367	LOC115256666::NW_021837046.1:10376527-10377527	LOC115256687::NW_021837046.1:10709388-10710388
368	LOC115256721::NW_021838798.1:27786265-27787265	LOC115256724::NW_021838798.1:28523048-28524048
369	LOC115256787::NW_021838798.1:76099270-76100270	LOC109408146::NW_021839153.1:1227258-1228258
370	LOC109420915::NW_021837931.1:25239836-25240836	LOC115256988::NW_021838810.1:1627846-1628846
371	LOC109414156::NW_021838621.1:5328016-5329016	LOC115257194::NW_021838865.1:466990-467990
372	LOC109414154::NW_021838621.1:5270088-5271088	LOC115257197::NW_021838865.1:416778-417778
373	LOC109414159::NW_021838621.1:5556568-5557568	LOC115257198::NW_021838865.1:829302-830302
374	LOC115257193::NW_021838865.1:78089-79089	LOC115257201::NW_021838865.1:89533-90533
375	LOC115254472::NW_021838621.1:5561676-5562676	LOC115257207::NW_021838865.1:834997-835997
376	LOC109408803::NW_021838153.1:34207605-34208605	LOC115257208::NW_021838865.1:172129-173129
377	LOC109426711::NW_021838153.1:9331320-9332320	LOC115257208::NW_021838865.1:172129-173129
378	LOC115257102::NW_021838843.1:3491909-3492909	LOC115257259::NW_021838881.1:32901-33901
379	LOC115257321::NW_021838896.1:3752-4752	LOC109622686::NW_021838684.1:416408-417408
380	LOC115256439::NW_021838798.1:59924365-59925365	LOC115257327::NW_021838898.1:2872262-2873262
381	LOC109431111::NW_021838410.1:5496529-5497529	LOC115257393::NW_021838909.1:29998659-29999659
382	LOC109429975::NW_021838909.1:6729005-6730005	LOC115257413::NW_021838909.1:7517622-7518622
383	LOC115257413::NW_021838909.1:7517622-7518622	LOC109430704::NW_021838909.1:10328444-10329444
384	LOC115257414::NW_021838909.1:7439033-7440033	LOC109430705::NW_021838909.1:10248017-10249017
385	LOC109429947::NW_021838909.1:7035175-7036175	LOC115257422::NW_021838909.1:7783991-7784991
386	LOC109403273::NW_021838909.1:40114696-40115696	LOC115257427::NW_021838909.1:40253546-40254546
387	LOC109402277::NW_021838909.1:69139389-69140389	LOC115257440::NW_021838909.1:70583054-70584054
388	LOC115257450::NW_021838909.1:61650701-61651701	LOC109402270::NW_021838909.1:70863444-70864444
389	LOC115257454::NW_021838909.1:78511095-78512095	LOC109403413::NW_021838909.1:80026591-80027591
390	LOC109403539::NW_021837600.1:18881535-18882535	LOC115257462::NW_021838909.1:67238097-67239097
391	LOC109403448::NW_021838909.1:78746426-78747426	LOC115257534::NW_021838909.1:80248254-80249254
392	LOC115257428::NW_021837046.1:29667399-29668399	LOC115257540::NW_021837046.1:32139430-32140430
393	LOC109400007::NW_021837578.1:1071032-1072032	LOC115257584::NW_021838909.1:86643241-86644241
394	LOC115257652::NW_021838909.1:2311997-2312997	LOC109430221::NW_021838909.1:3701144-3702144
395	LOC109400226::NW_021837600.1:2192252-2193252	LOC115257678::NW_021838909.1:77457054-77458054
396	LOC109400233::NW_021838153.1:28043-29043	LOC115257678::NW_021838909.1:77457054-77458054
397	LOC109418717::NW_021838576.1:95524012-95525012	LOC115257678::NW_021838909.1:77457054-77458054
398	LOC115257750::NW_021838909.1:89700289-89701289	LOC115257751::NW_021838909.1:89305685-89306685
399	LOC115257760::NW_021838909.1:61790462-61791462	LOC109433186::NW_021838909.1:69529091-69530091
400	LOC109413132::NW_021838909.1:18814945-18815945	LOC115257787::NW_021838909.1:18846700-18847700
401	LOC109433186::NW_021838909.1:69529091-69530091	LOC115257839::NW_021838909.1:71016309-71017309
402	LOC115257473::NW_021838909.1:77723639-77724639	LOC115257851::NW_021838909.1:77745958-77746958
403	LOC109399985::NW_021838909.1:75846436-75847436	LOC115257866::NW_021838909.1:85509965-85510965
404	LOC115257867::NW_021838909.1:85669633-85670633	LOC115254960::NW_021838687.1:6319322-6320322
405	LOC115257874::NW_021838909.1:92523066-92524066	LOC109399985::NW_021838909.1:75846436-75847436
406	LOC109402267::NW_021838909.1:69370809-69371809	LOC115257878::NW_021838909.1:70849238-70850238
407	LOC115257901::NW_021838909.1:10938103-10939103	LOC109429947::NW_021838909.1:7035175-7036175
408	LOC109622862::NW_021837046.1:43054188-43055188	LOC115257965::NW_021837046.1:43562352-43563352
409	LOC115258029::NW_021838921.1:3134806-3135806	LOC115258030::NW_021838921.1:3150963-3151963
410	LOC109397783::NW_021838554.1:2586659-2587659	LOC115258128::NW_021838938.1:219503-220503
411	LOC115258223::NW_021838965.1:2074887-2075887	LOC109621765::NW_021839020.1:1516953-1517953
412	LOC109423521::NW_021837489.1:21212422-21213422	LOC115258234::NW_021838969.1:23797-24797
413	LOC115258275::NW_021838976.1:1270627-1271627	LOC109406378::NW_021838976.1:1933816-1934816
414	LOC109405306::NW_021838976.1:1428455-1429455	LOC115258289::NW_021838976.1:2092067-2093067
415	LOC115258276::NW_021838976.1:1337829-1338829	LOC115258291::NW_021838976.1:1991498-1992498
416	LOC115258466::NW_021839020.1:36846922-36847922	LOC109407264::NW_021839020.1:39432269-39433269
417	LOC109410837::NW_021838477.1:2791257-2792257	LOC115258482::NW_021839020.1:46968081-46969081
418	LOC115255196::NW_021838687.1:11506222-11507222	LOC115258482::NW_021839020.1:46968081-46969081
419	LOC115255524::NW_021838687.1:97922840-97923840	LOC115258482::NW_021839020.1:46968081-46969081
420	LOC115258464::NW_021837046.1:49528634-49529634	LOC115258518::NW_021837046.1:49897539-49898539
421	LOC109397524::NW_021837489.1:7546338-7547338	LOC115258553::NW_021839020.1:14177242-14178242
422	LOC109421041::NW_021838736.1:48729-49729	LOC115258570::NW_021839020.1:61930640-61931640
423	LOC115258587::NW_021839020.1:30962704-30963704	LOC109404870::NW_021839020.1:29506988-29507988
424	LOC115258706::NW_021839020.1:57376489-57377489	LOC109408505::NW_021838637.1:223170-224170
425	LOC109397515::NW_021837045.1:171644599-171645599	LOC115258799::NW_021839020.1:76041912-76042912
426	LOC109414323::NW_021839020.1:50819398-50820398	LOC115258805::NW_021839020.1:52362070-52363070
427	LOC109417522::NW_021839020.1:79079991-79080991	LOC115258845::NW_021839020.1:79243251-79244251
428	LOC109410213::NW_021839020.1:79651614-79652614	LOC115258890::NW_021839020.1:80206069-80207069
429	LOC109417526::NW_021839020.1:79628965-79629965	LOC115258892::NW_021839020.1:80182224-80183224
430	LOC115258940::NW_021839020.1:23043187-23044187	LOC109418447::NW_021839020.1:27034621-27035621
431	LOC109432222::NW_021837711.1:12853026-12854026	LOC115259336::NW_021839103.1:77174-78174
432	LOC109427892::NW_021838233.1:15173645-15174645	LOC115259358::NW_021839110.1:67866-68866
433	LOC109408127::NW_021837378.1:6960259-6961259	LOC115259361::NW_021839114.1:128198-129198
434	LOC115259394::NW_021837046.1:17549354-17550354	LOC115259399::NW_021837046.1:17562055-17563055
435	LOC115259406::NW_021839130.1:54100483-54101483	LOC109403762::NW_021838510.1:2655259-2656259
436	LOC115259426::NW_021837046.1:21577979-21578979	LOC109413165::NW_021837600.1:46946949-46947949
437	LOC115259459::NW_021839130.1:59667884-59668884	LOC115259462::NW_021839130.1:61107525-61108525
438	LOC115259526::NW_021839130.1:8577307-8578307	LOC109417118::NW_021839130.1:8994473-8995473
439	LOC115259581::NW_021839130.1:24858373-24859373	LOC115259582::NW_021839130.1:24858373-24859373
440	LOC115259586::NW_021839130.1:51313945-51314945	LOC115259587::NW_021839130.1:51319404-51320404
441	LOC109411878::NW_021838449.1:709658-710658	LOC115259631::NW_021839130.1:61639496-61640496
442	LOC115259767::NW_021839130.1:51661096-51662096	LOC115259587::NW_021839130.1:51319404-51320404
443	LOC109411857::NW_021839130.1:59480860-59481860	LOC115259782::NW_021839130.1:60963279-60964279
444	LOC109423256::NW_021837545.1:520321-521321	LOC115259992::NW_021839165.1:128142-129142
445	LOC109403762::NW_021838510.1:2655259-2656259	LOC115260043::NW_021839185.1:141264-142264
446	LOC115260072::NW_021839197.1:1524594-1525594	LOC109429222::NW_021839197.1:1682423-1683423
447	LOC115260215::NW_021837080.1:536865-537865	LOC115256572::NW_021838798.1:74439739-74440739
448	LOC115260550::NW_021837156.1:54439776-54440776	LOC109431502::NW_021837156.1:57184330-57185330
449	LOC115260601::NW_021837156.1:15565096-15566096	LOC115260602::NW_021837156.1:15752795-15753795
450	LOC115260621::NW_021837156.1:20619737-20620737	LOC109421820::NW_021837156.1:21129891-21130891
451	LOC109422801::NW_021837156.1:20518691-20519691	LOC115260628::NW_021837156.1:21043842-21044842
452	LOC115260640::NW_021837045.1:59474263-59475263	LOC115260643::NW_021837045.1:59509854-59510854
453	LOC109424901::NW_021837156.1:34617420-34618420	LOC115260679::NW_021837156.1:40880118-40881118
454	LOC115260692::NW_021837156.1:45357022-45358022	LOC109423060::NW_021838676.1:3252960-3253960
455	LOC115260722::NW_021837156.1:51779183-51780183	LOC115254960::NW_021838687.1:6319322-6320322
456	LOC115260724::NW_021837156.1:53159956-53160956	LOC109406370::NW_021838554.1:5041762-5042762
457	LOC115260727::NW_021837156.1:54321391-54322391	LOC109427648::NW_021837156.1:57034616-57035616
458	LOC109431461::NW_021837156.1:54140842-54141842	LOC115260727::NW_021837156.1:54321391-54322391
459	LOC115260728::NW_021837156.1:55046975-55047975	LOC109427689::NW_021838184.1:1054810-1055810
460	LOC115260869::NW_021837190.1:1072405-1073405	LOC115260870::NW_021837190.1:1075048-1076048
461	LOC115260901::NW_021837045.1:92260173-92261173	LOC115260907::NW_021837045.1:92265299-92266299
462	LOC115260849::NW_021837045.1:88418305-88419305	LOC115260912::NW_021837045.1:93348940-93349940
463	LOC109412969::NW_021837156.1:36227778-36228778	LOC115260961::NW_021837212.1:1480617-1481617
464	LOC115260999::NW_021837234.1:257080-258080	LOC115261002::NW_021837234.1:442497-443497
465	LOC115261045::NW_021837245.1:979049-980049	LOC115255079::NW_021838687.1:32760804-32761804
466	LOC115261046::NW_021837248.1:50012-51012	LOC109421452::NW_021838153.1:117683916-117684916
467	LOC115261070::NW_021837259.1:40237-41237	LOC109431629::NW_021838443.1:6180134-6181134
468	LOC115261107::NW_021837267.1:4222705-4223705	LOC109406119::NW_021837267.1:4982328-4983328
469	LOC109406123::NW_021837267.1:4232876-4233876	LOC115261111::NW_021837267.1:4993267-4994267
470	LOC109621522::NW_021837267.1:6423343-6424343	LOC115261229::NW_021837267.1:6485796-6486796
471	LOC115261230::NW_021837267.1:6446147-6447147	LOC115261229::NW_021837267.1:6485796-6486796
472	LOC115261231::NW_021837267.1:6478689-6479689	LOC115261229::NW_021837267.1:6485796-6486796
473	LOC109621522::NW_021837267.1:6423343-6424343	LOC115261232::NW_021837267.1:6503603-6504603
474	LOC115261229::NW_021837267.1:6485796-6486796	LOC115261232::NW_021837267.1:6503603-6504603
475	LOC115261230::NW_021837267.1:6446147-6447147	LOC115261232::NW_021837267.1:6503603-6504603
476	LOC115261231::NW_021837267.1:6478689-6479689	LOC115261232::NW_021837267.1:6503603-6504603
477	LOC115261233::NW_021837267.1:6453247-6454247	LOC115261229::NW_021837267.1:6485796-6486796
478	LOC115261233::NW_021837267.1:6453247-6454247	LOC115261232::NW_021837267.1:6503603-6504603
479	LOC109417477::NW_021837267.1:6474420-6475420	LOC115261249::NW_021837267.1:6557279-6558279
480	LOC115261239::NW_021837267.1:6441912-6442912	LOC115261249::NW_021837267.1:6557279-6558279
481	LOC115261240::NW_021837267.1:6490445-6491445	LOC115261249::NW_021837267.1:6557279-6558279
482	LOC115261241::NW_021837267.1:6499349-6500349	LOC115261249::NW_021837267.1:6557279-6558279
483	LOC115261242::NW_021837267.1:6550165-6551165	LOC115261249::NW_021837267.1:6557279-6558279
484	LOC115261243::NW_021837267.1:6481552-6482552	LOC115261249::NW_021837267.1:6557279-6558279
485	LOC115261244::NW_021837267.1:6506466-6507466	LOC115261249::NW_021837267.1:6557279-6558279
486	LOC115261245::NW_021837267.1:6513565-6514565	LOC115261249::NW_021837267.1:6557279-6558279
487	LOC115261246::NW_021837267.1:6521011-6522011	LOC115261249::NW_021837267.1:6557279-6558279
488	LOC115261248::NW_021837267.1:6528113-6529113	LOC115261249::NW_021837267.1:6557279-6558279
489	LOC109417477::NW_021837267.1:6474420-6475420	LOC115261250::NW_021837267.1:6564389-6565389
490	LOC115261239::NW_021837267.1:6441912-6442912	LOC115261250::NW_021837267.1:6564389-6565389
491	LOC115261240::NW_021837267.1:6490445-6491445	LOC115261250::NW_021837267.1:6564389-6565389
492	LOC115261241::NW_021837267.1:6499349-6500349	LOC115261250::NW_021837267.1:6564389-6565389
493	LOC115261242::NW_021837267.1:6550165-6551165	LOC115261250::NW_021837267.1:6564389-6565389
494	LOC115261243::NW_021837267.1:6481552-6482552	LOC115261250::NW_021837267.1:6564389-6565389
495	LOC115261244::NW_021837267.1:6506466-6507466	LOC115261250::NW_021837267.1:6564389-6565389
496	LOC115261245::NW_021837267.1:6513565-6514565	LOC115261250::NW_021837267.1:6564389-6565389
497	LOC115261246::NW_021837267.1:6521011-6522011	LOC115261250::NW_021837267.1:6564389-6565389
498	LOC115261248::NW_021837267.1:6528113-6529113	LOC115261250::NW_021837267.1:6564389-6565389
499	LOC115261249::NW_021837267.1:6557279-6558279	LOC115261250::NW_021837267.1:6564389-6565389
500	LOC115261251::NW_021837267.1:6571483-6572483	LOC115261250::NW_021837267.1:6564389-6565389
501	LOC115261256::NW_021837267.1:6398217-6399217	LOC115261255::NW_021837267.1:6442347-6443347
502	LOC115261223::NW_021837267.1:6245719-6246719	LOC115261257::NW_021837267.1:6295587-6296587
503	LOC115261258::NW_021837267.1:6376129-6377129	LOC115261256::NW_021837267.1:6398217-6399217
504	LOC115261224::NW_021837267.1:6239984-6240984	LOC115261263::NW_021837267.1:6284868-6285868
505	LOC115261269::NW_021837267.1:6290930-6291930	LOC115261274::NW_021837267.1:6306271-6307271
506	LOC115261275::NW_021837267.1:6533653-6534653	LOC115261280::NW_021837267.1:6555370-6556370
507	LOC115261276::NW_021837267.1:6504557-6505557	LOC115261280::NW_021837267.1:6555370-6556370
508	LOC115261277::NW_021837267.1:6511656-6512656	LOC115261280::NW_021837267.1:6555370-6556370
509	LOC115261278::NW_021837267.1:6519102-6520102	LOC115261280::NW_021837267.1:6555370-6556370
510	LOC115261279::NW_021837267.1:6526204-6527204	LOC115261280::NW_021837267.1:6555370-6556370
511	LOC109401799::NW_021837267.1:6870409-6871409	LOC115261281::NW_021837267.1:6562480-6563480
512	LOC115261273::NW_021837267.1:6569573-6570573	LOC115261281::NW_021837267.1:6562480-6563480
513	LOC115261275::NW_021837267.1:6533653-6534653	LOC115261281::NW_021837267.1:6562480-6563480
514	LOC115261276::NW_021837267.1:6504557-6505557	LOC115261281::NW_021837267.1:6562480-6563480
515	LOC115261277::NW_021837267.1:6511656-6512656	LOC115261281::NW_021837267.1:6562480-6563480
516	LOC115261278::NW_021837267.1:6519102-6520102	LOC115261281::NW_021837267.1:6562480-6563480
517	LOC115261279::NW_021837267.1:6526204-6527204	LOC115261281::NW_021837267.1:6562480-6563480
518	LOC115261280::NW_021837267.1:6555370-6556370	LOC115261281::NW_021837267.1:6562480-6563480
519	LOC115261315::NW_021837267.1:12356635-12357635	LOC109403275::NW_021838563.1:241754-242754
520	LOC115261372::NW_021837267.1:24806485-24807485	LOC109398800::NW_021837267.1:28411864-28412864
521	LOC115261379::NW_021837045.1:134216346-134217346	LOC109400829::NW_021839130.1:17735976-17736976
522	LOC109398772::NW_021837267.1:25562023-25563023	LOC115261383::NW_021837267.1:29192545-29193545
523	LOC109398839::NW_021837267.1:25882811-25883811	LOC115261386::NW_021837267.1:29440475-29441475
524	LOC109409017::NW_021837267.1:32758061-32759061	LOC115261399::NW_021837267.1:33515014-33516014
525	LOC109409010::NW_021837267.1:32865274-32866274	LOC115261401::NW_021837267.1:33637192-33638192
526	LOC115261413::NW_021837267.1:35101028-35102028	LOC109427261::NW_021837267.1:37520643-37521643
527	LOC109427207::NW_021837267.1:39790873-39791873	LOC115261473::NW_021837267.1:44280440-44281440
528	LOC115261474::NW_021837267.1:45060796-45061796	LOC109406317::NW_021837267.1:45130227-45131227
529	LOC115261479::NW_021837267.1:45386429-45387429	LOC109404511::NW_021837267.1:46419380-46420380
530	LOC115261514::NW_021837267.1:50446797-50447797	LOC115259988::NW_021839164.1:1596179-1597179
531	LOC115261539::NW_021837267.1:54535303-54536303	LOC109416160::NW_021837379.1:1027030-1028030
532	LOC115261550::NW_021837267.1:55613442-55614442	LOC109416636::NW_021837267.1:56003871-56004871
533	LOC109432845::NW_021837267.1:53369750-53370750	LOC115261550::NW_021837267.1:55613442-55614442
534	LOC115261559::NW_021837267.1:56458505-56459505	LOC109416618::NW_021837267.1:58416298-58417298
535	LOC109432819::NW_021837267.1:55348406-55349406	LOC115261572::NW_021837267.1:58298105-58299105
536	LOC115261590::NW_021837267.1:6413847-6414847	LOC109415129::NW_021838965.1:2067000-2068000
537	LOC115261592::NW_021837267.1:6454201-6455201	LOC115261280::NW_021837267.1:6555370-6556370
538	LOC115261592::NW_021837267.1:6454201-6455201	LOC115261281::NW_021837267.1:6562480-6563480
539	LOC115261593::NW_021837267.1:6479643-6480643	LOC115261280::NW_021837267.1:6555370-6556370
540	LOC115261593::NW_021837267.1:6479643-6480643	LOC115261281::NW_021837267.1:6562480-6563480
541	LOC115261594::NW_021837267.1:6481987-6482987	LOC115261254::NW_021837267.1:6461923-6462923
542	LOC115261595::NW_021837267.1:6495653-6496653	LOC115261268::NW_021837267.1:6546470-6547470
543	LOC115261254::NW_021837267.1:6461923-6462923	LOC115261597::NW_021837267.1:6564824-6565824
544	LOC115261255::NW_021837267.1:6442347-6443347	LOC115261597::NW_021837267.1:6564824-6565824
545	LOC115261676::NW_021837268.1:6718-7718	LOC115260679::NW_021837156.1:40880118-40881118
546	LOC115261757::NW_021837294.1:67360-68360	LOC109422596::NW_021838576.1:1418549-1419549
547	LOC115261814::NW_021837045.1:183860338-183861338	LOC115260776::NW_021837156.1:19649389-19650389
548	LOC115261816::NW_021837312.1:236956-237956	LOC109414797::NW_021838600.1:119304-120304
549	LOC115261823::NW_021837045.1:187840138-187841138	LOC109402861::NW_021839124.1:19748-20748
550	LOC115261851::NW_021837334.1:1062687-1063687	LOC109417639::NW_021838687.1:5062086-5063086
551	LOC115262101::NW_021837378.1:9344682-9345682	LOC109429599::NW_021838031.1:966122-967122
552	LOC115262171::NW_021837378.1:41073729-41074729	LOC115262170::NW_021837378.1:41084091-41085091
553	LOC109419136::NW_021837045.1:22185567-22186567	LOC115262190::NW_021837045.1:24816383-24817383
554	LOC115262191::NW_021837378.1:49384488-49385488	LOC109411217::NW_021837378.1:49819745-49820745
555	LOC115262192::NW_021837378.1:49415088-49416088	LOC109411218::NW_021837378.1:49841445-49842445
556	LOC115262468::NW_021837467.1:756167-757167	LOC109427750::NW_021838493.1:570383-571383
557	LOC115262469::NW_021837467.1:821176-822176	LOC109427772::NW_021838493.1:629826-630826
558	LOC115262495::NW_021837478.1:353882-354882	LOC115257621::NW_021838909.1:25661927-25662927
559	LOC115262501::NW_021837478.1:426187-427187	LOC115257707::NW_021838909.1:25714401-25715401
560	LOC109623308::NW_021837489.1:32432128-32433128	LOC115262594::NW_021837489.1:33666383-33667383
561	LOC115262647::NW_021837489.1:7531940-7532940	LOC109622815::NW_021839020.1:14162714-14163714
562	LOC115262664::NW_021837489.1:18321800-18322800	LOC109404291::NW_021837489.1:18862362-18863362
563	LOC115262666::NW_021837489.1:20772516-20773516	LOC115262674::NW_021837489.1:24767998-24768998
564	LOC109404246::NW_021837489.1:19875092-19876092	LOC115262675::NW_021837489.1:23839109-23840109
565	LOC115262690::NW_021837489.1:30732914-30733914	LOC115254963::NW_021838687.1:7844712-7845712
566	LOC109623382::NW_021837489.1:32169347-32170347	LOC115262704::NW_021837489.1:33371826-33372826
567	LOC109623316::NW_021837489.1:32247514-32248514	LOC115262705::NW_021837489.1:33448804-33449804
568	LOC109401306::NW_021837489.1:36667760-36668760	LOC115262744::NW_021837489.1:39834460-39835460
569	LOC115262749::NW_021837489.1:41374914-41375914	LOC109407900::NW_021837489.1:43886575-43887575
570	LOC109413556::NW_021837489.1:41382518-41383518	LOC115262757::NW_021837489.1:43894936-43895936
571	LOC115262791::NW_021837489.1:11423114-11424114	LOC115255657::NW_021838688.1:539264-540264
572	LOC109418397::NW_021837045.1:11523075-11524075	LOC115262950::NW_021837045.1:14079496-14080496
573	LOC115263032::NW_021837578.1:1061090-1062090	LOC109417534::NW_021837578.1:1099538-1100538
574	LOC115263074::NW_021837600.1:6960811-6961811	LOC109426889::NW_021838643.1:5870206-5871206
575	LOC109430764::NW_021837600.1:20092518-20093518	LOC115263094::NW_021837600.1:22861099-22862099
576	LOC115263111::NW_021837600.1:36108101-36109101	LOC109416608::NW_021838682.1:125535-126535
577	LOC115263198::NW_021837600.1:16219173-16220173	LOC109430816::NW_021837600.1:16788059-16789059
578	LOC109418450::NW_021837045.1:16681608-16682608	LOC115263207::NW_021837045.1:17080208-17081208
579	LOC109430804::NW_021837600.1:20154951-20155951	LOC115263238::NW_021837600.1:22942221-22943221
580	LOC109430805::NW_021837600.1:20156609-20157609	LOC115263239::NW_021837600.1:22943880-22944880
581	LOC109421491::NW_021837045.1:173105020-173106020	LOC115263245::NW_021837600.1:25820601-25821601
582	LOC109403802::NW_021837600.1:33032127-33033127	LOC115263301::NW_021837600.1:39156336-39157336
583	LOC115263330::NW_021837600.1:2182119-2183119	LOC109418596::NW_021838153.1:17907-18907
584	LOC109430912::NW_021837600.1:9767385-9768385	LOC115263346::NW_021837600.1:10117593-10118593
585	LOC115263569::NW_021837689.1:951723-952723	LOC115257678::NW_021838909.1:77457054-77458054
586	LOC115263682::NW_021837711.1:2979996-2980996	LOC109423228::NW_021839187.1:38242-39242
587	LOC109425434::NW_021837379.1:119734-120734	LOC115263718::NW_021837711.1:16567488-16568488
588	LOC115263732::NW_021837711.1:20913377-20914377	LOC115254915::NW_021838687.1:80490336-80491336
589	LOC115263756::NW_021837711.1:31680749-31681749	LOC109401747::NW_021838153.1:60102012-60103012
590	LOC115256435::NW_021837046.1:4635790-4636790	LOC115263756::NW_021837711.1:31680749-31681749
591	LOC115262913::NW_021837523.1:1518684-1519684	LOC115263786::NW_021837711.1:5710039-5711039
592	LOC115263805::NW_021837711.1:15635625-15636625	LOC109621764::NW_021838715.1:80900-81900
593	LOC115263837::NW_021837711.1:15627212-15628212	LOC109415278::NW_021838715.1:72483-73483
594	LOC115263870::NW_021837045.1:26723032-26724032	LOC109415967::NW_021837045.1:27369729-27370729
595	LOC115264164::NW_021837822.1:13589968-13590968	LOC109411039::NW_021838555.1:130182-131182
596	LOC115264188::NW_021837045.1:30327618-30328618	LOC109419239::NW_021837045.1:30560655-30561655
597	LOC115264248::NW_021837822.1:35491724-35492724	LOC115264249::NW_021837822.1:35686101-35687101
598	LOC115264252::NW_021837822.1:35384068-35385068	LOC109413361::NW_021837822.1:35598893-35599893
599	LOC115264077::NW_021837822.1:35333753-35334753	LOC115264255::NW_021837822.1:35732860-35733860
600	LOC115264318::NW_021837822.1:20877363-20878363	LOC115258054::NW_021838923.1:97322-98322
601	LOC115264397::NW_021837834.1:58545-59545	LOC115255483::NW_021838687.1:66064428-66065428
602	LOC115264467::NW_021837045.1:36097194-36098194	LOC109397643::NW_021838518.1:511231-512231
603	LOC115264515::NW_021837931.1:30374823-30375823	LOC115264516::NW_021837931.1:30444611-30445611
604	LOC115261603::NW_021837045.1:168920672-168921672	LOC115264518::NW_021837931.1:30900150-30901150
605	LOC109420152::NW_021837931.1:18058363-18059363	LOC115264609::NW_021837931.1:18509333-18510333
606	LOC109420123::NW_021837931.1:18262308-18263308	LOC115264616::NW_021837931.1:18704005-18705005
607	LOC115264657::NW_021837931.1:25295752-25296752	LOC109415900::NW_021839150.1:146965-147965
608	LOC109412634::NW_021837931.1:25297263-25298263	LOC115264659::NW_021837931.1:25328723-25329723
609	LOC115264696::NW_021837931.1:35948030-35949030	LOC109422261::NW_021839153.1:1382975-1383975
610	LOC115264753::NW_021837931.1:19484937-19485937	LOC109419479::NW_021838576.1:98618970-98619970
611	LOC115253860::NW_021837965.1:953310-954310	LOC115264836::NW_021837965.1:1037927-1038927
612	LOC109403728::NW_021837267.1:7857689-7858689	LOC115264884::NW_021838009.1:906071-907071
613	LOC109408545::NW_021837378.1:8477363-8478363	LOC115264897::NW_021838031.1:97549-98549
614	LOC115264926::NW_021838042.1:13443888-13444888	LOC109404233::NW_021838042.1:17304676-17305676
615	LOC109402890::NW_021837045.1:46071437-46072437	LOC115264930::NW_021837045.1:47447958-47448958
616	LOC115264925::NW_021838042.1:12867468-12868468	LOC115264933::NW_021838042.1:16763640-16764640
617	LOC115265016::NW_021838043.1:446266-447266	LOC109423256::NW_021837545.1:520321-521321
618	LOC109425728::NW_021837545.1:522284-523284	LOC115265017::NW_021838043.1:448220-449220
619	LOC115265065::NW_021838076.1:648156-649156	LOC115263786::NW_021837711.1:5710039-5711039
620	LOC109404306::NW_021838076.1:822674-823674	LOC115265071::NW_021838076.1:1043951-1044951
621	LOC115263152::NW_021837600.1:2182755-2183755	LOC115265236::NW_021838153.1:18543-19543
622	LOC115265247::NW_021838153.1:3810728-3811728	LOC109426821::NW_021838153.1:5245820-5246820
623	LOC115257931::NW_021837046.1:40378269-40379269	LOC115265262::NW_021838153.1:13253422-13254422
624	LOC109432869::NW_021837845.1:978127-979127	LOC115265360::NW_021838153.1:53848788-53849788
625	LOC109409789::NW_021838153.1:55075585-55076585	LOC115265375::NW_021838153.1:56460678-56461678
626	LOC115265434::NW_021837045.1:59473472-59474472	LOC109402257::NW_021838366.1:540437-541437
627	LOC115265435::NW_021837045.1:59509063-59510063	LOC109402257::NW_021838366.1:540437-541437
628	LOC115265434::NW_021837045.1:59473472-59474472	LOC115265435::NW_021837045.1:59509063-59510063
629	LOC115265498::NW_021838153.1:110928041-110929041	LOC115256601::NW_021838798.1:48745379-48746379
630	LOC115265505::NW_021837045.1:67385091-67386091	LOC115257772::NW_021838909.1:91359827-91360827
631	LOC115265515::NW_021838153.1:117924157-117925157	LOC109432548::NW_021838153.1:124940288-124941288
632	LOC109421431::NW_021838153.1:118139705-118140705	LOC115265560::NW_021838153.1:125123667-125124667
633	LOC109432544::NW_021838153.1:118979195-118980195	LOC115265565::NW_021838153.1:125951461-125952461
634	LOC115265586::NW_021837045.1:74538507-74539507	LOC115258799::NW_021839020.1:76041912-76042912
635	LOC115265601::NW_021838153.1:148497137-148498137	LOC109404800::NW_021838153.1:150931563-150932563
636	LOC115265604::NW_021838153.1:149796705-149797705	LOC109623251::NW_021838424.1:222314-223314
637	LOC109430988::NW_021838153.1:156231853-156232853	LOC115265634::NW_021838153.1:157744167-157745167
638	LOC115265643::NW_021838153.1:161175850-161176850	LOC115257026::NW_021838821.1:1272878-1273878
639	LOC115265693::NW_021838153.1:17663864-17664864	LOC109426626::NW_021838153.1:18828442-18829442
640	LOC115265694::NW_021838153.1:17669172-17670172	LOC115265698::NW_021838153.1:18833748-18834748
641	LOC115265695::NW_021838153.1:17681043-17682043	LOC115265699::NW_021838153.1:18852259-18853259
642	LOC109406715::NW_021837316.1:25325-26325	LOC115266121::NW_021838154.1:1306787-1307787
643	LOC115266115::NW_021837045.1:88250825-88251825	LOC115266272::NW_021837045.1:90195810-90196810
644	LOC115266293::NW_021838233.1:3008770-3009770	LOC109414446::NW_021838233.1:3347376-3348376
645	LOC115266296::NW_021838233.1:3272684-3273684	LOC109621322::NW_021838233.1:4147957-4148957
646	LOC109414457::NW_021838233.1:5940945-5941945	LOC115266329::NW_021838233.1:8322815-8323815
647	LOC109400203::NW_021837045.1:91600968-91601968	LOC115266353::NW_021837045.1:92438136-92439136
648	LOC109428229::NW_021837046.1:49075770-49076770	LOC115266356::NW_021838233.1:14393900-14394900
649	LOC109428219::NW_021837767.1:721409-722409	LOC115266358::NW_021838233.1:14815456-14816456
650	LOC115266327::NW_021838233.1:8187871-8188871	LOC115266361::NW_021838233.1:15617977-15618977
651	LOC115266476::NW_021838278.1:1003681-1004681	LOC115266474::NW_021838278.1:1003681-1004681
652	LOC109417111::NW_021838332.1:668261-669261	LOC115266522::NW_021838332.1:697228-698228
653	LOC115266549::NW_021837045.1:99735663-99736663	LOC109401328::NW_021837045.1:99923600-99924600
654	LOC109408200::NW_021837122.1:89258-90258	LOC115266567::NW_021838343.1:6351776-6352776
655	LOC109416500::NW_021838343.1:12039566-12040566	LOC115266603::NW_021838343.1:13989664-13990664
656	LOC115266664::NW_021838343.1:20267317-20268317	LOC115254705::NW_021838655.1:149610-150610
657	LOC109416501::NW_021838343.1:13925466-13926466	LOC115266687::NW_021838343.1:14423728-14424728
658	LOC109416489::NW_021838343.1:14823042-14824042	LOC115266688::NW_021838343.1:14832184-14833184
659	LOC115266750::NW_021838385.1:342772-343772	LOC109412528::NW_021838576.1:102279236-102280236
660	LOC115261556::NW_021837045.1:162807346-162808346	LOC115266783::NW_021838388.1:10384678-10385678
661	LOC109430135::NW_021838388.1:10966862-10967862	LOC115266796::NW_021838388.1:11480020-11481020
662	LOC115265394::NW_021838153.1:68323707-68324707	LOC115266801::NW_021838388.1:11729354-11730354
663	LOC115266842::NW_021838391.1:608936-609936	LOC109408801::NW_021838465.1:9077038-9078038
664	LOC115266878::NW_021838396.1:471518-472518	LOC115266879::NW_021838396.1:463431-464431
665	LOC115266885::NW_021838396.1:455344-456344	LOC115266879::NW_021838396.1:463431-464431
666	LOC115266912::NW_021838399.1:335450-336450	LOC109408115::NW_021838399.1:2899794-2900794
667	LOC115266977::NW_021838401.1:967059-968059	LOC109621825::NW_021838576.1:23305935-23306935
668	LOC115266987::NW_021838404.1:93987-94987	LOC109427537::NW_021838687.1:3043020-3044020
669	LOC115267050::NW_021838410.1:7325010-7326010	LOC109399840::NW_021838410.1:8255879-8256879
670	LOC109411254::NW_021837045.1:115987485-115988485	LOC115267156::NW_021837045.1:116388506-116389506
671	LOC109413231::NW_021838417.1:306432-307432	LOC115267163::NW_021838417.1:682423-683423
672	LOC115267261::NW_021838423.1:639147-640147	LOC115267262::NW_021838423.1:857447-858447
673	LOC109421032::NW_021837711.1:32532696-32533696	LOC115267334::NW_021838432.1:6545836-6546836
674	LOC115267338::NW_021838432.1:7362262-7363262	LOC115257590::NW_021838909.1:9634504-9635504
675	LOC115267361::NW_021838432.1:8921291-8922291	LOC115267371::NW_021838432.1:11885505-11886505
676	LOC109416385::NW_021838432.1:8306151-8307151	LOC115267390::NW_021838432.1:9864922-9865922
677	LOC115267456::NW_021838442.1:53117-54117	LOC109421136::NW_021838465.1:58608652-58609652
678	LOC115267468::NW_021838443.1:4448626-4449626	LOC115256787::NW_021838798.1:76099270-76100270
679	LOC109397959::NW_021838443.1:1853244-1854244	LOC115267486::NW_021838443.1:2254275-2255275
680	LOC109397949::NW_021837301.1:813411-814411	LOC115267489::NW_021838443.1:2862869-2863869
681	LOC115267494::NW_021838443.1:5186740-5187740	LOC109430934::NW_021839086.1:817899-818899
682	LOC115267511::NW_021838443.1:3222816-3223816	LOC115258698::NW_021839020.1:7422978-7423978
683	LOC115267516::NW_021838443.1:5155731-5156731	LOC115254031::NW_021839086.1:789025-790025
684	LOC109426171::NW_021838454.1:5904739-5905739	LOC115267613::NW_021838454.1:7700587-7701587
685	LOC109401962::NW_021838465.1:1233757-1234757	LOC115267706::NW_021838465.1:2250463-2251463
686	LOC115267733::NW_021838465.1:10750166-10751166	LOC109428592::NW_021838510.1:7381805-7382805
687	LOC109408741::NW_021838465.1:6855033-6856033	LOC115267735::NW_021838465.1:10780403-10781403
688	LOC109414909::NW_021838465.1:6422525-6423525	LOC115267748::NW_021838465.1:15818948-15819948
689	LOC109408711::NW_021838465.1:14029014-14030014	LOC115267751::NW_021838465.1:17889760-17890760
690	LOC109409855::NW_021838465.1:27204697-27205697	LOC115267792::NW_021838465.1:29841818-29842818
691	LOC109397010::NW_021838461.1:493080-494080	LOC115267809::NW_021838465.1:36060409-36061409
692	LOC109400795::NW_021838465.1:45310998-45311998	LOC115267837::NW_021838465.1:46571488-46572488
693	LOC115267847::NW_021838465.1:50782340-50783340	LOC109402416::NW_021838887.1:2202765-2203765
694	LOC115267848::NW_021838465.1:51206686-51207686	LOC115267849::NW_021838465.1:51650613-51651613
695	LOC115267859::NW_021838465.1:56869246-56870246	LOC109410565::NW_021838465.1:57917969-57918969
696	LOC115267860::NW_021838465.1:56963222-56964222	LOC109421151::NW_021838465.1:58027851-58028851
697	LOC115267865::NW_021838465.1:61340505-61341505	LOC109414407::NW_021838465.1:61927041-61928041
698	LOC109409194::NW_021837378.1:49795859-49796859	LOC115267969::NW_021838465.1:103811098-103812098
699	LOC115267973::NW_021838465.1:105361706-105362706	LOC115267976::NW_021838465.1:105970401-105971401
700	LOC115263792::NW_021837711.1:11584815-11585815	LOC115267982::NW_021838465.1:4383031-4384031
701	LOC115267990::NW_021837045.1:107577707-107578707	LOC109424018::NW_021837045.1:108097350-108098350
702	LOC115268014::NW_021838465.1:114596999-114597999	LOC109426059::NW_021838465.1:115949720-115950720
703	LOC115260698::NW_021837156.1:48351885-48352885	LOC115268026::NW_021838465.1:118528732-118529732
704	LOC115268031::NW_021838465.1:119850374-119851374	LOC109426019::NW_021838465.1:123693798-123694798
705	LOC109426018::NW_021838465.1:119865054-119866054	LOC115268051::NW_021838465.1:123700902-123701902
706	LOC109425973::NW_021838465.1:126013618-126014618	LOC115268086::NW_021838465.1:135029980-135030980
707	LOC115262195::NW_021837378.1:49791773-49792773	LOC115268186::NW_021838465.1:103807011-103808011
708	LOC109621439::NW_021837204.1:75536-76536	LOC115268350::NW_021838465.1:108623300-108624300
709	LOC115268394::NW_021838465.1:129771922-129772922	LOC109425886::NW_021838465.1:133204650-133205650
710	LOC115268456::NW_021838466.1:1565535-1566535	LOC109407939::NW_021839186.1:1741313-1742313
711	LOC115268495::NW_021838466.1:6537712-6538712	LOC109417986::NW_021839133.1:49397-50397
712	LOC115268497::NW_021838466.1:6748204-6749204	LOC109417989::NW_021838466.1:7287171-7288171
713	LOC115268547::NW_021838466.1:9972506-9973506	LOC109422072::NW_021838798.1:7649826-7650826
714	LOC115268609::NW_021838477.1:5884319-5885319	LOC109402493::NW_021838477.1:7258295-7259295
715	LOC115263778::NW_021837045.1:22875390-22876390	LOC115268620::NW_021838477.1:7741960-7742960
716	LOC115265466::NW_021837045.1:25004256-25005256	LOC115268620::NW_021838477.1:7741960-7742960
717	LOC115268623::NW_021838477.1:5897722-5898722	LOC109402479::NW_021838477.1:7276749-7277749
718	LOC109427995::NW_021838488.1:4266293-4267293	LOC115268733::NW_021838488.1:5175468-5176468
719	LOC115268756::NW_021837045.1:148708620-148709620	LOC109399355::NW_021837700.1:84395-85395
720	LOC109427674::NW_021837467.1:557195-558195	LOC115268763::NW_021838493.1:303446-304446
721	LOC109427703::NW_021837467.1:661685-662685	LOC115268764::NW_021838493.1:415343-416343
722	LOC115268801::NW_021837045.1:149360422-149361422	LOC109423289::NW_021838576.1:67343307-67344307
723	LOC115268850::NW_021838499.1:148383-149383	LOC109425258::NW_021839130.1:57321909-57322909
724	LOC115268886::NW_021838504.1:383761-384761	LOC109426333::NW_021838932.1:1691425-1692425
725	LOC115268934::NW_021838510.1:1873127-1874127	LOC109419441::NW_021838510.1:1962492-1963492
726	LOC115268993::NW_021838515.1:472999-473999	LOC115256160::NW_021838765.1:1503001-1504001
727	LOC115268995::NW_021838516.1:474878-475878	LOC109398842::NW_021839130.1:19029581-19030581
728	LOC115269054::NW_021838521.1:1314737-1315737	LOC109422144::NW_021838521.1:6827591-6828591
729	LOC115269067::NW_021838521.1:2452632-2453632	LOC109410330::NW_021838927.1:87096-88096
730	LOC109432607::NW_021838521.1:1477550-1478550	LOC115269098::NW_021838521.1:6740198-6741198
731	LOC115269107::NW_021838521.1:1961797-1962797	LOC109404727::NW_021838521.1:2239018-2240018
732	LOC115269146::NW_021838526.1:362241-363241	LOC115256801::NW_021838798.1:70371240-70372240
733	LOC115269155::NW_021838528.1:411477-412477	LOC109410166::NW_021838798.1:22494140-22495140
734	LOC109405423::NW_021838530.1:181520-182520	LOC115269183::NW_021838530.1:353220-354220
735	LOC115266641::NW_021837045.1:103252318-103253318	LOC115269191::NW_021838532.1:4874265-4875265
736	LOC115269264::NW_021838541.1:10805-11805	LOC109423138::NW_021838541.1:40878-41878
737	LOC115269276::NW_021838542.1:501975-502975	LOC109430914::NW_021838603.1:384035-385035
738	LOC115269278::NW_021838543.1:279803-280803	LOC115269280::NW_021838543.1:2653075-2654075
739	LOC109407870::NW_021837423.1:76178-77178	LOC115269289::NW_021838543.1:7607531-7608531
740	LOC115268712::NW_021838486.1:386586-387586	LOC115269289::NW_021838543.1:7607531-7608531
741	LOC109415300::NW_021837369.1:49505-50505	LOC115269301::NW_021838543.1:279143-280143
742	LOC115269301::NW_021838543.1:279143-280143	LOC115269279::NW_021838543.1:2652415-2653415
743	LOC115265401::NW_021838153.1:70643638-70644638	LOC115269304::NW_021838543.1:728418-729418
744	LOC109415298::NW_021838543.1:1942535-1943535	LOC115269309::NW_021838543.1:2711622-2712622
745	LOC109415284::NW_021838543.1:3761484-3762484	LOC115269314::NW_021838543.1:4060274-4061274
746	LOC115269354::NW_021838547.1:259997-260997	LOC109419765::NW_021838687.1:25260802-25261802
747	LOC115269399::NW_021838554.1:4985814-4986814	LOC115255851::NW_021838719.1:163141-164141
748	LOC115264313::NW_021837045.1:32450327-32451327	LOC115269427::NW_021837045.1:160189767-160190767
749	LOC115269440::NW_021838554.1:6823022-6824022	LOC109424525::NW_021838554.1:7154678-7155678
750	LOC109398594::NW_021837822.1:13620339-13621339	LOC115269452::NW_021838555.1:157313-158313
751	LOC115264162::NW_021837822.1:13579054-13580054	LOC115269453::NW_021838555.1:111145-112145
752	LOC115269454::NW_021838556.1:538514-539514	LOC115258482::NW_021839020.1:46968081-46969081
753	LOC115261314::NW_021837267.1:12353210-12354210	LOC115269502::NW_021838563.1:238331-239331
754	LOC109422825::NW_021838564.1:96330-97330	LOC115269504::NW_021838564.1:143421-144421
755	LOC115268109::NW_021838465.1:30472739-30473739	LOC115269523::NW_021838565.1:7109845-7110845
756	LOC115269756::NW_021838576.1:76032881-76033881	LOC115256618::NW_021837046.1:9849951-9850951
757	LOC115269775::NW_021838576.1:87450905-87451905	LOC115269785::NW_021838576.1:93450781-93451781
758	LOC109408645::NW_021838576.1:98543856-98544856	LOC115269806::NW_021838576.1:113997890-113998890
759	LOC115256092::NW_021837046.1:48682570-48683570	LOC115269882::NW_021838576.1:77071476-77072476
760	LOC115265139::NW_021838153.1:42718129-42719129	LOC115269930::NW_021838576.1:115670846-115671846
761	LOC115270053::NW_021838576.1:23246530-23247530	LOC109413197::NW_021838576.1:23254747-23255747
762	LOC115270055::NW_021838576.1:23295268-23296268	LOC109404547::NW_021838576.1:23305283-23306283
763	LOC115266976::NW_021838401.1:959829-960829	LOC115270056::NW_021838576.1:23298960-23299960
764	LOC109404554::NW_021838576.1:23303391-23304391	LOC115270058::NW_021838576.1:23312120-23313120
765	LOC115270062::NW_021838576.1:23329837-23330837	LOC109400639::NW_021838576.1:23401460-23402460
766	LOC115270063::NW_021838576.1:23332414-23333414	LOC109404523::NW_021838576.1:23395460-23396460
767	LOC115270067::NW_021838576.1:23344798-23345798	LOC115270064::NW_021838576.1:23336045-23337045
768	LOC115270068::NW_021838576.1:23347344-23348344	LOC109400639::NW_021838576.1:23401460-23402460
769	LOC115270069::NW_021838576.1:23346692-23347692	LOC109400638::NW_021838576.1:23400808-23401808
770	LOC115270066::NW_021838576.1:23341031-23342031	LOC115270070::NW_021838576.1:23349785-23350785
771	LOC115270064::NW_021838576.1:23336045-23337045	LOC115270071::NW_021838576.1:23353569-23354569
772	LOC115270076::NW_021838576.1:23383726-23384726	LOC109400638::NW_021838576.1:23400808-23401808
773	LOC115270076::NW_021838576.1:23383726-23384726	LOC109404520::NW_021838576.1:23392231-23393231
774	LOC115270079::NW_021838576.1:23362342-23363342	LOC115270067::NW_021838576.1:23344798-23345798
775	LOC115270082::NW_021838576.1:23404037-23405037	LOC109404523::NW_021838576.1:23395460-23396460
776	LOC115270084::NW_021838576.1:23409379-23410379	LOC109400638::NW_021838576.1:23400808-23401808
777	LOC109404524::NW_021838576.1:23390334-23391334	LOC115270086::NW_021838576.1:23407486-23408486
778	LOC109413179::NW_021838576.1:23325413-23326413	LOC115270086::NW_021838576.1:23407486-23408486
779	LOC109404524::NW_021838576.1:23390334-23391334	LOC115270087::NW_021838576.1:23398911-23399911
780	LOC115270087::NW_021838576.1:23398911-23399911	LOC115270086::NW_021838576.1:23407486-23408486
781	LOC115270094::NW_021838576.1:24490751-24491751	LOC115270086::NW_021838576.1:23407486-23408486
782	LOC115270098::NW_021838576.1:25271005-25272005	LOC115270115::NW_021838576.1:30857994-30858994
783	LOC115270130::NW_021838576.1:36203840-36204840	LOC109426947::NW_021838576.1:36246645-36247645
784	LOC109408066::NW_021838576.1:46703803-46704803	LOC115270159::NW_021838576.1:46813951-46814951
785	LOC109408065::NW_021838576.1:46758496-46759496	LOC115270160::NW_021838576.1:46872904-46873904
786	LOC109417488::NW_021838576.1:56827629-56828629	LOC115270239::NW_021838576.1:60978119-60979119
787	LOC109430681::NW_021838576.1:56833451-56834451	LOC115270241::NW_021838576.1:60982667-60983667
788	LOC109423842::NW_021838576.1:60226759-60227759	LOC115270253::NW_021838576.1:65987476-65988476
789	LOC115270274::NW_021838576.1:68360036-68361036	LOC109423799::NW_021838576.1:69272599-69273599
790	LOC115270276::NW_021837045.1:183280278-183281278	LOC109401064::NW_021837045.1:183785352-183786352
791	LOC109427064::NW_021838109.1:100763-101763	LOC115270283::NW_021838576.1:69557911-69558911
792	LOC115270284::NW_021838576.1:69857859-69858859	LOC115270290::NW_021838576.1:70597786-70598786
793	LOC109423781::NW_021837061.1:37036-38036	LOC115270301::NW_021838576.1:72573548-72574548
794	LOC115270300::NW_021838576.1:72382489-72383489	LOC115270301::NW_021838576.1:72573548-72574548
795	LOC115263504::NW_021837634.1:1388843-1389843	LOC115270320::NW_021838576.1:82832376-82833376
796	LOC115270328::NW_021838576.1:84384122-84385122	LOC115254262::NW_021838576.1:110324481-110325481
797	LOC109404304::NW_021838076.1:779320-780320	LOC115270366::NW_021838576.1:91751712-91752712
798	LOC109404373::NW_021838076.1:970619-971619	LOC115270368::NW_021838576.1:91929867-91930867
799	LOC109403077::NW_021838576.1:88353232-88354232	LOC115270392::NW_021838576.1:96660684-96661684
800	LOC115270394::NW_021838576.1:98503094-98504094	LOC109408647::NW_021838576.1:113960429-113961429
801	LOC115260538::NW_021837156.1:41482674-41483674	LOC115270397::NW_021838576.1:99680200-99681200
802	LOC115270431::NW_021838576.1:111585120-111586120	LOC115270433::NW_021838576.1:111612585-111613585
803	LOC109408644::NW_021838576.1:98546387-98547387	LOC115270438::NW_021838576.1:114000421-114001421
804	LOC109622200::NW_021838576.1:98549945-98550945	LOC115270439::NW_021838576.1:114003961-114004961
805	LOC109622202::NW_021838576.1:98583832-98584832	LOC115270440::NW_021838576.1:114022124-114023124
806	LOC109622204::NW_021838576.1:98663542-98664542	LOC115270441::NW_021838576.1:114066252-114067252
807	LOC109428245::NW_021838233.1:13488344-13489344	LOC115271029::NW_021838589.1:110145-111145
808	LOC109422671::NW_021838154.1:24382694-24383694	LOC115271068::NW_021838599.1:3634137-3635137

## Sheet: Twins_regions_5_1000bp
	Pos_1_gene_1	Pos_2_gene1
1	LOC109397473::NW_021838687.1:57117220-57118220	LOC109397475::NW_021838687.1:57124637-57125637
2	LOC109397482::NW_021838687.1:57112644-57113644	LOC109397487::NW_021838687.1:57127468-57128468
3	LOC109397503::NW_021838687.1:60343021-60344021	LOC109397481::NW_021838687.1:60350134-60351134
4	LOC109397504::NW_021838687.1:60342367-60343367	LOC109397494::NW_021838687.1:60349480-60350480
5	LOC109398559::NW_021837822.1:12004077-12005077	LOC109398360::NW_021837822.1:12776236-12777236
6	LOC109398053::NW_021838454.1:1721437-1722437	LOC109399439::NW_021838454.1:3584138-3585138
7	LOC109398011::NW_021838454.1:1666190-1667190	LOC109399467::NW_021838454.1:3547477-3548477
8	LOC109400382::NW_021838798.1:3431781-3432781	LOC109398400::NW_021838798.1:3662385-3663385
9	LOC109399676::NW_021838712.1:164131-165131	LOC109400467::NW_021838646.1:169887-170887
10	LOC109400689::NW_021838576.1:20243126-20244126	LOC109399383::NW_021838576.1:20830251-20831251
11	LOC109399591::NW_021838465.1:44320958-44321958	LOC109400785::NW_021838465.1:44813007-44814007
12	LOC109401443::NW_021838465.1:51704044-51705044	LOC109399665::NW_021838465.1:52146600-52147600
13	LOC109399657::NW_021838465.1:51940117-51941117	LOC109401597::NW_021838465.1:52355326-52356326
14	LOC109399720::NW_021837711.1:44979834-44980834	LOC109402022::NW_021837711.1:45205832-45206832
15	LOC109402722::NW_021839127.1:27895-28895	LOC109400722::NW_021838576.1:17889150-17890150
16	LOC109403153::NW_021838765.1:1215394-1216394	LOC109403151::NW_021837045.1:42567876-42568876
17	LOC109404163::NW_021837822.1:35525545-35526545	LOC109403940::NW_021837822.1:35625027-35626027
18	LOC109404276::NW_021838576.1:86541358-86542358	LOC109403127::NW_021838576.1:92660067-92661067
19	LOC109404310::NW_021838076.1:719218-720218	LOC109403106::NW_021838576.1:91653041-91654041
20	LOC109403124::NW_021838576.1:86194506-86195506	LOC109404336::NW_021838576.1:92501577-92502577
21	LOC109404520::NW_021838576.1:23390857-23391857	LOC109400638::NW_021838576.1:23399434-23400434
22	LOC109404521::NW_021838576.1:23391509-23392509	LOC109400639::NW_021838576.1:23400086-23401086
23	LOC109404558::NW_021838576.1:23249905-23250905	LOC109404553::NW_021838576.1:23271232-23272232
24	LOC109404569::NW_021838576.1:23385203-23386203	LOC109404523::NW_021838576.1:23393780-23394780
25	LOC109404650::NW_021837046.1:17782041-17783041	LOC109401431::NW_021837046.1:19209946-19210946
26	LOC109404843::NW_021839020.1:28886504-28887504	LOC109398702::NW_021839020.1:30657532-30658532
27	LOC109397817::NW_021838688.1:1835136-1836136	LOC109405354::NW_021838688.1:1040124-1041124
28	LOC109405370::NW_021838688.1:416972-417972	LOC109397829::NW_021838798.1:90172174-90173174
29	LOC109405472::NW_021838490.1:34469-35469	LOC109402397::NW_021838887.1:2937831-2938831
30	LOC109406121::NW_021837267.1:4182945-4183945	LOC109401751::NW_021837267.1:4919422-4920422
31	LOC109407712::NW_021837931.1:13164563-13165563	LOC109407713::NW_021837931.1:13164563-13165563
32	LOC109408236::NW_021839152.1:18600-19600	LOC109408897::NW_021838343.1:7631470-7632470
33	LOC109408900::NW_021839152.1:127192-128192	LOC109408240::NW_021838343.1:7737890-7738890
34	LOC109409427::NW_021838798.1:10647034-10648034	LOC109398391::NW_021838798.1:11100899-11101899
35	LOC109409509::NW_021837046.1:56938367-56939367	LOC109409479::NW_021837045.1:134589287-134590287
36	LOC109409864::NW_021838811.1:140990-141990	LOC109397086::NW_021838465.1:28330376-28331376
37	LOC109409947::NW_021838465.1:28484455-28485455	LOC109397064::NW_021838465.1:38123958-38124958
38	LOC109401451::NW_021837045.1:50269078-50270078	LOC109410471::NW_021837045.1:50984474-50985474
39	LOC109410730::NW_021837045.1:122973206-122974206	LOC109410889::NW_021837045.1:124653603-124654603
40	LOC109411037::NW_021838482.1:161991-162991	LOC109411035::NW_021837822.1:13620075-13621075
41	LOC109411089::NW_021838343.1:1840798-1841798	LOC109410268::NW_021838343.1:3676329-3677329
42	LOC109409988::NW_021837920.1:189961-190961	LOC109411515::NW_021838388.1:191938-192938
43	LOC109397928::NW_021838494.1:152485-153485	LOC109411589::NW_021838798.1:55906532-55907532
44	LOC109401827::NW_021838699.1:1044909-1045909	LOC109412092::NW_021838699.1:1094864-1095864
45	LOC109405810::NW_021837045.1:61508199-61509199	LOC109412341::NW_021838343.1:2942363-2943363
46	LOC109412725::NW_021839130.1:58711470-58712470	LOC109411862::NW_021839130.1:60110341-60111341
47	LOC109409534::NW_021838798.1:5073831-5074831	LOC109412988::NW_021838798.1:6324237-6325237
48	LOC109412996::NW_021838421.1:7431824-7432824	LOC109402217::NW_021838421.1:8427356-8428356
49	LOC109404554::NW_021838576.1:23302080-23303080	LOC109413179::NW_021838576.1:23324102-23325102
50	LOC109413189::NW_021838576.1:23262422-23263422	LOC109404553::NW_021838576.1:23271232-23272232
51	LOC109413239::NW_021838417.1:63384-64384	LOC109402166::NW_021838417.1:168770-169770
52	LOC109413309::NW_021838576.1:23354090-23355090	LOC109404534::NW_021838576.1:23336564-23337564
53	LOC109413376::NW_021837822.1:35334475-35335475	LOC109406760::NW_021837822.1:35534079-35535079
54	LOC109413381::NW_021837822.1:35457897-35458897	LOC109413382::NW_021837822.1:35759377-35760377
55	LOC109403941::NW_021837822.1:35724432-35725432	LOC109413414::NW_021837822.1:35623793-35624793
56	LOC109404088::NW_021837822.1:35524310-35525310	LOC109413414::NW_021837822.1:35623793-35624793
57	LOC109413503::NW_021838576.1:30120509-30121509	LOC109404936::NW_021838576.1:31276100-31277100
58	LOC109413553::NW_021837489.1:41424804-41425804	LOC109407902::NW_021837489.1:43934064-43935064
59	LOC109413555::NW_021837489.1:41438126-41439126	LOC109407907::NW_021837489.1:43946719-43947719
60	LOC109413608::NW_021837489.1:36706301-36707301	LOC109401236::NW_021837489.1:39887758-39888758
61	LOC109401249::NW_021837489.1:36004336-36005336	LOC109413613::NW_021837489.1:39232707-39233707
62	LOC109413841::NW_021838466.1:1434399-1435399	LOC109407940::NW_021839186.1:1555185-1556185
63	LOC109407924::NW_021838466.1:2295817-2296817	LOC109413865::NW_021838466.1:2772926-2773926
64	LOC109407257::NW_021839020.1:49714576-49715576	LOC109414325::NW_021839020.1:50834328-50835328
65	LOC109401902::NW_021838699.1:1938621-1939621	LOC109414693::NW_021838699.1:3176262-3177262
66	LOC109401899::NW_021838699.1:1781235-1782235	LOC109414694::NW_021838399.1:10580294-10581294
67	LOC109403605::NW_021838432.1:2824086-2825086	LOC109414760::NW_021838432.1:5449022-5450022
68	LOC109401945::NW_021837711.1:9553807-9554807	LOC109414846::NW_021838576.1:69351161-69352161
69	LOC109414950::NW_021839130.1:14108992-14109992	LOC109397184::NW_021839130.1:14525164-14526164
70	LOC109415097::NW_021837323.1:1083955-1084955	LOC109403000::NW_021837323.1:1224730-1225730
71	LOC109415315::NW_021838931.1:64837-65837	LOC109403536::NW_021838153.1:75670482-75671482
72	LOC109409390::NW_021837931.1:19499437-19500437	LOC109415893::NW_021837931.1:20883418-20884418
73	LOC109415912::NW_021837156.1:35592847-35593847	LOC109412955::NW_021837156.1:41786773-41787773
74	LOC109416070::NW_021837822.1:23958168-23959168	LOC109402926::NW_021837822.1:24555089-24556089
75	LOC109416112::NW_021837822.1:23724123-23725123	LOC109402910::NW_021837822.1:24329518-24330518
76	LOC109412350::NW_021837046.1:28195089-28196089	LOC109416190::NW_021837046.1:31104950-31105950
77	LOC109416522::NW_021838421.1:11778352-11779352	LOC109398535::NW_021839020.1:72633455-72634455
78	LOC109417340::NW_021838723.1:134300-135300	LOC109414141::NW_021837267.1:21353318-21354318
79	LOC109410223::NW_021838390.1:388381-389381	LOC109417539::NW_021838384.1:401448-402448
80	LOC109417709::NW_021838687.1:76290131-76291131	LOC109417700::NW_021838687.1:78014584-78015584
81	LOC109418026::NW_021838799.1:2202300-2203300	LOC109418024::NW_021838153.1:100370607-100371607
82	LOC109409633::NW_021838154.1:6340804-6341804	LOC109418390::NW_021838154.1:7396835-7397835
83	LOC109413084::NW_021838909.1:11673595-11674595	LOC109418512::NW_021838909.1:12954678-12955678
84	LOC109405279::NW_021838909.1:22241066-22242066	LOC109418619::NW_021838909.1:23091006-23092006
85	LOC109417077::NW_021838909.1:40109567-40110567	LOC109418811::NW_021838909.1:40242892-40243892
86	LOC109409313::NW_021839020.1:2342624-2343624	LOC109419114::NW_021839020.1:6430556-6431556
87	LOC109419136::NW_021837045.1:22171392-22172392	LOC109417514::NW_021837045.1:22668854-22669854
88	LOC109409296::NW_021839020.1:4279666-4280666	LOC109419529::NW_021839020.1:8375992-8376992
89	LOC109419565::NW_021839020.1:4775969-4776969	LOC109409352::NW_021839020.1:8942538-8943538
90	LOC109410019::NW_021838153.1:50686822-50687822	LOC109419667::NW_021838153.1:52458422-52459422
91	LOC109397337::NW_021838153.1:38144273-38145273	LOC109420256::NW_021838153.1:39441850-39442850
92	LOC109420465::NW_021837378.1:32211226-32212226	LOC109420463::NW_021837378.1:32219698-32220698
93	LOC109420466::NW_021837378.1:32206991-32207991	LOC109420464::NW_021837378.1:32215463-32216463
94	LOC109420474::NW_021837378.1:54884450-54885450	LOC109420483::NW_021837378.1:54888607-54889607
95	LOC109420483::NW_021837378.1:54888607-54889607	LOC109420486::NW_021837378.1:54892767-54893767
96	LOC109420492::NW_021838687.1:26014170-26015170	LOC109419733::NW_021838687.1:26916318-26917318
97	LOC109419940::NW_021838687.1:53194176-53195176	LOC109420736::NW_021838687.1:53830873-53831873
98	LOC109420738::NW_021838687.1:53203949-53204949	LOC109419942::NW_021838687.1:53840294-53841294
99	LOC109420739::NW_021838687.1:53223260-53224260	LOC109419943::NW_021838687.1:53855278-53856278
100	LOC109420740::NW_021838687.1:53221706-53222706	LOC109419944::NW_021838687.1:53853724-53854724
101	LOC109420743::NW_021838687.1:53275088-53276088	LOC109419949::NW_021838687.1:53898092-53899092
102	LOC109411065::NW_021838576.1:105314044-105315044	LOC109420861::NW_021838576.1:121289769-121290769
103	LOC109420908::NW_021838943.1:1124342-1125342	LOC109412694::NW_021838943.1:2349628-2350628
104	LOC109413900::NW_021838732.1:2715560-2716560	LOC109421118::NW_021838732.1:3526837-3527837
105	LOC109408842::NW_021838513.1:543390-544390	LOC109421121::NW_021838489.1:563685-564685
106	LOC109410556::NW_021838465.1:56997728-56998728	LOC109421148::NW_021838465.1:58063266-58064266
107	LOC109421150::NW_021838465.1:56963136-56964136	LOC109410579::NW_021838465.1:58027763-58028763
108	LOC109410563::NW_021838465.1:56894009-56895009	LOC109421163::NW_021838465.1:57954426-57955426
109	LOC109410568::NW_021838465.1:56795748-56796748	LOC109421166::NW_021838465.1:57832314-57833314
110	LOC109417180::NW_021838909.1:89406182-89407182	LOC109422440::NW_021838909.1:89775774-89776774
111	LOC109422764::NW_021837156.1:20619203-20620203	LOC109421828::NW_021837156.1:21129357-21130357
112	LOC109422812::NW_021837711.1:20824168-20825168	LOC109400888::NW_021837156.1:26200046-26201046
113	LOC109405329::NW_021837156.1:851628-852628	LOC109422992::NW_021837156.1:1161115-1162115
114	LOC109397273::NW_021838729.1:233413-234413	LOC109423180::NW_021838655.1:252586-253586
115	LOC109397254::NW_021837711.1:2231126-2232126	LOC109423229::NW_021837711.1:3050873-3051873
116	LOC109418354::NW_021838233.1:7850428-7851428	LOC109423406::NW_021838153.1:122417373-122418373
117	LOC109414546::NW_021837045.1:137989721-137990721	LOC109423417::NW_021837045.1:138687472-138688472
118	LOC109423887::NW_021838153.1:151582781-151583781	LOC109404823::NW_021838153.1:153368158-153369158
119	LOC109423910::NW_021838153.1:151975423-151976423	LOC109404787::NW_021838153.1:153797325-153798325
120	LOC109404786::NW_021838153.1:152053296-152054296	LOC109423912::NW_021838153.1:153871815-153872815
121	LOC109407870::NW_021837423.1:73949-74949	LOC109424310::NW_021838665.1:5501829-5502829
122	LOC109424318::NW_021839130.1:8613364-8614364	LOC109403740::NW_021839130.1:9033433-9034433
123	LOC109424461::NW_021838403.1:535513-536513	LOC109422365::NW_021839208.1:1265014-1266014
124	LOC109412946::NW_021837156.1:36362100-36363100	LOC109424758::NW_021837156.1:42463870-42464870
125	LOC109414641::NW_021837976.1:1153701-1154701	LOC109424800::NW_021837822.1:33871770-33872770
126	LOC109424808::NW_021837156.1:36016260-36017260	LOC109412950::NW_021837156.1:42143644-42144644
127	LOC109424851::NW_021837822.1:30035993-30036993	LOC109414593::NW_021837822.1:31306696-31307696
128	LOC109425145::NW_021838517.1:606922-607922	LOC109412438::NW_021838576.1:63899051-63900051
129	LOC109400333::NW_021838042.1:5437853-5438853	LOC109425183::NW_021838042.1:5867150-5868150
130	LOC109425391::NW_021837156.1:40981376-40982376	LOC109418683::NW_021837156.1:34736178-34737178
131	LOC109423388::NW_021839165.1:128534-129534	LOC109425728::NW_021837545.1:520706-521706
132	LOC109425767::NW_021839190.1:53639-54639	LOC109407506::NW_021837378.1:54816504-54817504
133	LOC109418414::NW_021837045.1:13285279-13286279	LOC109426145::NW_021837045.1:15890345-15891345
134	LOC109426157::NW_021838856.1:224937-225937	LOC109398034::NW_021838454.1:5918900-5919900
135	LOC109410282::NW_021838567.1:63209-64209	LOC109426252::NW_021838597.1:86616-87616
136	LOC109426534::NW_021838465.1:68261115-68262115	LOC109408363::NW_021838465.1:72864514-72865514
137	LOC109423891::NW_021838765.1:2113499-2114499	LOC109426562::NW_021838810.1:3578620-3579620
138	LOC109419885::NW_021838554.1:7094567-7095567	LOC109426615::NW_021838687.1:65117985-65118985
139	LOC109426636::NW_021838153.1:16071664-16072664	LOC109410530::NW_021838153.1:18338882-18339882
140	LOC109426637::NW_021838153.1:12145916-12146916	LOC109417608::NW_021838153.1:13458581-13459581
141	LOC109426658::NW_021838427.1:421099-422099	LOC109426659::NW_021838153.1:17362256-17363256
142	LOC109426687::NW_021838153.1:10904511-10905511	LOC109417784::NW_021838153.1:12841335-12842335
143	LOC109417789::NW_021838153.1:10770813-10771813	LOC109426690::NW_021838153.1:12699199-12700199
144	LOC109417854::NW_021838153.1:3923180-3924180	LOC109426815::NW_021838153.1:5349773-5350773
145	LOC109427120::NW_021837045.1:88229964-88230964	LOC109400204::NW_021837045.1:90174367-90175367
146	LOC109427198::NW_021838954.1:2241653-2242653	LOC109411671::NW_021837267.1:40947035-40948035
147	LOC109411618::NW_021837267.1:35487226-35488226	LOC109427250::NW_021837267.1:38014630-38015630
148	LOC109414720::NW_021838153.1:24580621-24581621	LOC109427302::NW_021838153.1:25585708-25586708
149	LOC109412097::NW_021838603.1:462165-463165	LOC109427354::NW_021838542.1:556362-557362
150	LOC109427826::NW_021837046.1:49859325-49860325	LOC109419980::NW_021838465.1:114408575-114409575
151	LOC109418218::NW_021838488.1:421827-422827	LOC109427979::NW_021838488.1:3874911-3875911
152	LOC109418273::NW_021837045.1:4126962-4127962	LOC109428051::NW_021837045.1:4862385-4863385
153	LOC109411639::NW_021837123.1:1482548-1483548	LOC109428129::NW_021837267.1:37014288-37015288
154	LOC109427959::NW_021838233.1:19000340-19001340	LOC109428277::NW_021838233.1:19163272-19164272
155	LOC109428758::NW_021838719.1:59397-60397	LOC109424533::NW_021838554.1:4893874-4894874
156	LOC109424527::NW_021838554.1:6774457-6775457	LOC109428766::NW_021838554.1:7112709-7113709
157	LOC109428792::NW_021838938.1:150980-151980	LOC109397784::NW_021838904.1:171939-172939
158	LOC109428866::NW_021838465.1:18943893-18944893	LOC109411436::NW_021838465.1:20297731-20298731
159	LOC109428919::NW_021838465.1:13963408-13964408	LOC109408712::NW_021838465.1:17782958-17783958
160	LOC109428949::NW_021838465.1:6936464-6937464	LOC109408737::NW_021838465.1:10850643-10851643
161	LOC109429076::NW_021837888.1:1034009-1035009	LOC109399284::NW_021838153.1:91135513-91136513
162	LOC109398784::NW_021837267.1:31301072-31302072	LOC109429154::NW_021837267.1:32071469-32072469
163	LOC109429187::NW_021837267.1:24710043-24711043	LOC109398834::NW_021837267.1:28309048-28310048
164	LOC109425117::NW_021838399.1:11779407-11780407	LOC109429380::NW_021838399.1:12692023-12693023
165	LOC109406842::NW_021837045.1:39132516-39133516	LOC109429499::NW_021837045.1:43778254-43779254
166	LOC109429717::NW_021838031.1:109706-110706	LOC109408549::NW_021837378.1:8488581-8489581
167	LOC109429841::NW_021838387.1:555421-556421	LOC109398295::NW_021837378.1:30205141-30206141
168	LOC109429927::NW_021838397.1:623329-624329	LOC109415439::NW_021837378.1:27657241-27658241
169	LOC109414742::NW_021838432.1:8700978-8701978	LOC109430017::NW_021838432.1:10250778-10251778
170	LOC109430451::NW_021837045.1:142404020-142405020	LOC109409570::NW_021837045.1:142633592-142634592
171	LOC109423813::NW_021838576.1:68075183-68076183	LOC109430616::NW_021838576.1:69030654-69031654
172	LOC109423071::NW_021837445.1:1093-2093	LOC109430683::NW_021837489.1:14208513-14209513
173	LOC109430784::NW_021837600.1:18733298-18734298	LOC109419421::NW_021837600.1:22125540-22126540
174	LOC109430828::NW_021837600.1:15825890-15826890	LOC109424158::NW_021837600.1:16397047-16398047
175	LOC109430902::NW_021838603.1:393781-394781	LOC109412100::NW_021838542.1:511606-512606
176	LOC109430926::NW_021838603.1:339790-340790	LOC109412105::NW_021838542.1:449546-450546
177	LOC109430953::NW_021838603.1:238186-239186	LOC109412112::NW_021838542.1:334059-335059
178	LOC109412116::NW_021838603.1:137999-138999	LOC109430970::NW_021838542.1:290264-291264
179	LOC109431002::NW_021838042.1:13519279-13520279	LOC109404231::NW_021838042.1:17380143-17381143
180	LOC109420145::NW_021837931.1:18177027-18178027	LOC109431252::NW_021837931.1:18635536-18636536
181	LOC109427644::NW_021837156.1:54190138-54191138	LOC109431502::NW_021837156.1:57085804-57086804
182	LOC109430927::NW_021839086.1:717807-718807	LOC109431669::NW_021838443.1:5077960-5078960
183	LOC109398026::NW_021838454.1:6960049-6961049	LOC109431685::NW_021838454.1:9157141-9158141
184	LOC109431715::NW_021838534.1:184705-185705	LOC109430060::NW_021838534.1:188133-189133
185	LOC109431749::NW_021837045.1:48701277-48702277	LOC109401450::NW_021837045.1:49836776-49837776
186	LOC109402951::NW_021837045.1:45816020-45817020	LOC109431763::NW_021837045.1:45816020-45817020
187	LOC109404407::NW_021838154.1:8229695-8230695	LOC109431916::NW_021838154.1:11104348-11105348
188	LOC109427086::NW_021837489.1:1793732-1794732	LOC109432083::NW_021838909.1:49574902-49575902
189	LOC109432097::NW_021837711.1:12283006-12284006	LOC109425408::NW_021837711.1:15509688-15510688
190	LOC109425434::NW_021837379.1:101563-102563	LOC109432218::NW_021837711.1:13369301-13370301
191	LOC109425437::NW_021837711.1:13574727-13575727	LOC109432219::NW_021837711.1:16695889-16696889
192	LOC109432222::NW_021837711.1:12772747-12773747	LOC109425431::NW_021837711.1:15946277-15947277
193	LOC109432241::NW_021838461.1:744081-745081	LOC109396981::NW_021838465.1:36298335-36299335
194	LOC109423064::NW_021838676.1:3091161-3092161	LOC109432360::NW_021837156.1:45157845-45158845
195	LOC109432507::NW_021837248.1:918-1918	LOC109421387::NW_021838153.1:117641917-117642917
196	LOC109432534::NW_021838153.1:119196098-119197098	LOC109421419::NW_021838153.1:126162347-126163347
197	LOC109421442::NW_021838153.1:117923225-117924225	LOC109432547::NW_021838153.1:124939356-124940356
198	LOC109432558::NW_021838153.1:118149613-118150613	LOC109421430::NW_021838153.1:125136531-125137531
199	LOC109432562::NW_021838153.1:117793074-117794074	LOC109421447::NW_021838153.1:124805928-124806928
200	LOC109432569::NW_021838153.1:117970627-117971627	LOC109421437::NW_021838153.1:124978844-124979844
201	LOC109421435::NW_021838153.1:117973610-117974610	LOC109432573::NW_021838153.1:124981826-124982826
202	LOC109432845::NW_021837267.1:53324748-53325748	LOC109416636::NW_021837267.1:55950510-55951510
203	LOC109401394::NW_021837046.1:14742793-14743793	LOC109432890::NW_021837046.1:16568954-16569954
204	LOC109432900::NW_021837046.1:14567287-14568287	LOC109401376::NW_021837046.1:16428733-16429733
205	LOC109411298::NW_021837046.1:1238285-1239285	LOC109433057::NW_021837046.1:7361744-7362744
206	LOC109404652::NW_021839230.1:100182-101182	LOC109433069::NW_021839032.1:157419-158419
207	LOC109420252::NW_021837046.1:1442945-1443945	LOC109433086::NW_021837046.1:5482852-5483852
208	LOC109433129::NW_021837046.1:11939693-11940693	LOC109411313::NW_021837046.1:12543688-12544688
209	LOC109433178::NW_021838909.1:61302072-61303072	LOC109402277::NW_021838909.1:69085997-69086997
210	LOC109410673::NW_021838465.1:99070645-99071645	LOC109433510::NW_021838465.1:99083771-99084771
211	LOC109433563::NW_021838388.1:10884386-10885386	LOC109430133::NW_021838388.1:11409684-11410684
212	LOC109433584::NW_021838388.1:8114324-8115324	LOC109430123::NW_021838388.1:9596148-9597148
213	LOC109621581::NW_021838450.1:650549-651549	LOC109400103::NW_021837711.1:32722235-32723235
214	LOC109430841::NW_021837931.1:10030465-10031465	LOC109621615::NW_021839020.1:18870751-18871751
215	LOC109621651::NW_021838576.1:23248005-23249005	LOC109404563::NW_021838576.1:23269341-23270341
216	LOC109404529::NW_021838576.1:23255644-23256644	LOC109621655::NW_021838576.1:23277293-23278293
217	LOC109404564::NW_021838576.1:23268690-23269690	LOC109621655::NW_021838576.1:23277293-23278293
218	LOC109621653::NW_021838401.1:954762-955762	LOC109621663::NW_021838401.1:965033-966033
219	LOC109621664::NW_021838576.1:23383004-23384004	LOC109400639::NW_021838576.1:23400086-23401086
220	LOC109621654::NW_021838401.1:955414-956414	LOC109621825::NW_021838576.1:23304561-23305561
221	LOC109621915::NW_021837489.1:16184074-16185074	LOC109397422::NW_021837489.1:17745702-17746702
222	LOC109417988::NW_021838466.1:6747340-6748340	LOC109621927::NW_021838466.1:7286307-7287307
223	LOC109621944::NW_021838042.1:15188794-15189794	LOC109404209::NW_021838042.1:19077900-19078900
224	LOC109404207::NW_021838042.1:15514064-15515064	LOC109621948::NW_021838042.1:19293125-19294125
225	LOC109415053::NW_021838042.1:15985169-15986169	LOC109621962::NW_021838042.1:19761755-19762755
226	LOC109622059::NW_021837045.1:160093394-160094394	LOC109405053::NW_021837045.1:162243382-162244382
227	LOC109622076::NW_021837045.1:154059707-154060707	LOC109413936::NW_021837045.1:162065436-162066436
228	LOC109622175::NW_021838576.1:98672411-98673411	LOC109408636::NW_021838576.1:113775707-113776707
229	LOC109622196::NW_021838576.1:113635638-113636638	LOC109408647::NW_021838576.1:113950228-113951228
230	LOC109431563::NW_021838190.1:295492-296492	LOC109622219::NW_021838465.1:82508854-82509854
231	LOC109622534::NW_021838508.1:619210-620210	LOC109414426::NW_021838233.1:9656384-9657384
232	LOC109622588::NW_021838042.1:15616307-15617307	LOC109415041::NW_021838042.1:19366409-19367409
233	LOC109622611::NW_021837489.1:19877535-19878535	LOC109622040::NW_021837489.1:23841485-23842485
234	LOC109622643::NW_021838289.1:658921-659921	LOC109429617::NW_021837378.1:11526681-11527681
235	LOC109429645::NW_021837378.1:211070-212070	LOC109622663::NW_021837378.1:13344052-13345052
236	LOC109622706::NW_021838562.1:198185-199185	LOC109419960::NW_021838562.1:215014-216014
237	LOC109417991::NW_021838466.1:6808408-6809408	LOC109622784::NW_021838466.1:7325943-7326943
238	LOC109397529::NW_021839020.1:13759707-13760707	LOC109622823::NW_021839020.1:14826353-14827353
239	LOC109429990::NW_021837045.1:170931292-170932292	LOC109622916::NW_021837045.1:171038437-171039437
240	LOC109622949::NW_021837909.1:676404-677404	LOC109421275::NW_021838153.1:123144761-123145761
241	LOC109623408::NW_021837378.1:108876-109876	LOC109429642::NW_021837378.1:13217061-13218061
242	LOC115253425::NW_021838576.1:106461928-106462928	LOC109401008::NW_021838576.1:122843453-122844453
243	LOC109399541::NW_021837931.1:1530949-1531949	LOC115253429::NW_021837931.1:3540324-3541324
244	LOC109422021::NW_021837976.1:635222-636222	LOC115253444::NW_021838798.1:29182134-29183134
245	LOC109400409::NW_021837316.1:1186-2186	LOC115253495::NW_021839130.1:64727318-64728318
246	LOC115253534::NW_021837168.1:832975-833975	LOC109402423::NW_021837168.1:1379070-1380070
247	LOC115253571::NW_021838909.1:69528591-69529591	LOC109402286::NW_021838909.1:71015812-71016812
248	LOC109425587::NW_021838465.1:72798470-72799470	LOC115253653::NW_021838465.1:69957890-69958890
249	LOC115253653::NW_021838465.1:69957890-69958890	LOC109621273::NW_021838465.1:70218286-70219286
250	LOC115253661::NW_021838687.1:77225364-77226364	LOC109417703::NW_021838687.1:80173409-80174409
251	LOC115253687::NW_021837156.1:43283877-43284877	LOC109412941::NW_021837156.1:43990888-43991888
252	LOC115253690::NW_021837123.1:1768111-1769111	LOC109411639::NW_021837123.1:1482548-1483548
253	LOC115253695::NW_021837045.1:64670531-64671531	LOC109411331::NW_021837045.1:66076271-66077271
254	LOC115253702::NW_021838153.1:152110671-152111671	LOC109423917::NW_021838153.1:153927501-153928501
255	LOC115253717::NW_021837489.1:41382591-41383591	LOC109407901::NW_021837489.1:43895029-43896029
256	LOC115253739::NW_021837931.1:1559614-1560614	LOC109405371::NW_021837931.1:3555805-3556805
257	LOC115253783::NW_021838687.1:78679851-78680851	LOC115253661::NW_021838687.1:77225364-77226364
258	LOC115253828::NW_021838687.1:28136740-28137740	LOC109420527::NW_021838687.1:28136740-28137740
259	LOC109414325::NW_021839020.1:50834328-50835328	LOC115253843::NW_021839020.1:52400360-52401360
260	LOC115253858::NW_021838343.1:2107480-2108480	LOC109411112::NW_021838343.1:2601535-2602535
261	LOC115253913::NW_021838598.1:167954-168954	LOC109429570::NW_021838598.1:363714-364714
262	LOC109419080::NW_021838586.1:389120-390120	LOC115253928::NW_021838632.1:4105432-4106432
263	LOC115253953::NW_021838712.1:12556-13556	LOC109403808::NW_021838465.1:50346925-50347925
264	LOC115253959::NW_021838754.1:255529-256529	LOC109414087::NW_021838754.1:801081-802081
265	LOC115253981::NW_021838832.1:2639790-2640790	LOC109402806::NW_021838832.1:2871703-2872703
266	LOC115254017::NW_021839020.1:18274994-18275994	LOC109621501::NW_021839020.1:18897381-18898381
267	LOC115254025::NW_021839020.1:29168903-29169903	LOC109404870::NW_021839020.1:29485347-29486347
268	LOC115254027::NW_021839020.1:67934748-67935748	LOC109428627::NW_021839020.1:69009827-69010827
269	LOC115254049::NW_021837156.1:21309668-21310668	LOC109422772::NW_021837156.1:27918231-27919231
270	LOC115254075::NW_021837267.1:39680401-39681401	LOC109427210::NW_021837267.1:44205778-44206778
271	LOC109430912::NW_021837600.1:9549220-9550220	LOC115254102::NW_021837600.1:11481843-11482843
272	LOC109402036::NW_021837711.1:44942599-44943599	LOC115254114::NW_021837711.1:45165483-45166483
273	LOC115254152::NW_021837045.1:64613997-64614997	LOC109411330::NW_021837045.1:66510782-66511782
274	LOC115254184::NW_021838432.1:7885347-7886347	LOC109416360::NW_021838432.1:9476969-9477969
275	LOC115254194::NW_021838465.1:44780517-44781517	LOC109399623::NW_021838465.1:45262517-45263517
276	LOC109423851::NW_021838576.1:55731834-55732834	LOC115254254::NW_021838576.1:56157002-56158002
277	LOC109399513::NW_021838947.1:218152-219152	LOC115254259::NW_021838576.1:88989025-88990025
278	LOC109429803::NW_021838645.1:310015-311015	LOC115254310::NW_021838610.1:6098840-6099840
279	LOC115254369::NW_021838610.1:5152751-5153751	LOC115253583::NW_021838610.1:5174021-5175021
280	LOC109414161::NW_021838865.1:833191-834191	LOC115254470::NW_021838621.1:5559870-5560870
281	LOC109423199::NW_021838406.1:681988-682988	LOC115254539::NW_021838632.1:1629604-1630604
282	LOC109419888::NW_021838586.1:377997-378997	LOC115254542::NW_021838632.1:4097928-4098928
283	LOC115254604::NW_021838643.1:3209805-3210805	LOC115254605::NW_021838643.1:3212764-3213764
284	LOC115254756::NW_021838665.1:2234550-2235550	LOC109422850::NW_021838665.1:3409060-3410060
285	LOC115254773::NW_021838665.1:2239143-2240143	LOC109422851::NW_021838665.1:3413714-3414714
286	LOC115254888::NW_021838687.1:57115302-57116302	LOC109397483::NW_021838687.1:57122709-57123709
287	LOC109423071::NW_021837445.1:1093-2093	LOC115255014::NW_021838687.1:20193626-20194626
288	LOC109430683::NW_021837489.1:14208513-14209513	LOC115255014::NW_021838687.1:20193626-20194626
289	LOC115255017::NW_021838687.1:21211272-21212272	LOC109419754::NW_021838687.1:22696251-22697251
290	LOC109407425::NW_021838687.1:28058038-28059038	LOC115255051::NW_021838687.1:28631723-28632723
291	LOC109420647::NW_021838687.1:36495806-36496806	LOC115255110::NW_021838687.1:42356995-42357995
292	LOC115255129::NW_021838687.1:46765636-46766636	LOC115255131::NW_021838687.1:46773809-46774809
293	LOC109429678::NW_021838798.1:19729260-19730260	LOC115255149::NW_021838687.1:49700225-49701225
294	LOC115255162::NW_021838687.1:53205782-53206782	LOC109419941::NW_021838687.1:53842127-53843127
295	LOC115255181::NW_021838687.1:57113298-57114298	LOC115253798::NW_021838687.1:57128122-57129122
296	LOC115255182::NW_021838687.1:57120705-57121705	LOC115253798::NW_021838687.1:57128122-57129122
297	LOC115255181::NW_021838687.1:57113298-57114298	LOC115255182::NW_021838687.1:57120705-57121705
298	LOC109397482::NW_021838687.1:57112644-57113644	LOC115255183::NW_021838687.1:57120051-57121051
299	LOC115255183::NW_021838687.1:57120051-57121051	LOC109397487::NW_021838687.1:57127468-57128468
300	LOC115255205::NW_021838687.1:59378055-59379055	LOC109397485::NW_021838687.1:59371052-59372052
301	LOC109397477::NW_021838687.1:59375308-59376308	LOC115255206::NW_021838687.1:59382310-59383310
302	LOC109407175::NW_021838687.1:59389323-59390323	LOC115255206::NW_021838687.1:59382310-59383310
303	LOC109397478::NW_021838687.1:59378709-59379709	LOC115255207::NW_021838687.1:59385709-59386709
304	LOC109397485::NW_021838687.1:59371052-59372052	LOC115255208::NW_021838687.1:59385055-59386055
305	LOC115255209::NW_021838687.1:59387695-59388695	LOC109407174::NW_021838687.1:60345025-60346025
306	LOC109397470::NW_021838687.1:57130122-57131122	LOC115255220::NW_021838687.1:60352139-60353139
307	LOC109407174::NW_021838687.1:60345025-60346025	LOC115255220::NW_021838687.1:60352139-60353139
308	LOC115255201::NW_021838687.1:59353457-59354457	LOC115255221::NW_021838687.1:60367303-60368303
309	LOC115255223::NW_021838687.1:60364820-60365820	LOC109407186::NW_021838687.1:60371918-60372918
310	LOC115255203::NW_021838687.1:59355473-59356473	LOC115255224::NW_021838687.1:60376432-60377432
311	LOC115255244::NW_021838687.1:62491648-62492648	LOC109417777::NW_021838687.1:63317048-63318048
312	LOC115255255::NW_021838687.1:64464583-64465583	LOC109419402::NW_021838687.1:65560693-65561693
313	LOC109426616::NW_021838687.1:65070133-65071133	LOC115255261::NW_021838687.1:66160291-66161291
314	LOC115255270::NW_021838687.1:67858562-67859562	LOC109417755::NW_021838687.1:69712012-69713012
315	LOC109420013::NW_021838687.1:67806504-67807504	LOC115255289::NW_021838687.1:69660117-69661117
316	LOC115255328::NW_021838687.1:77286533-77287533	LOC115253935::NW_021838687.1:80230701-80231701
317	LOC115255407::NW_021838687.1:91473637-91474637	LOC115254625::NW_021837045.1:138432594-138433594
318	LOC109407439::NW_021838687.1:28049215-28050215	LOC115255429::NW_021838687.1:28049215-28050215
319	LOC109407545::NW_021838687.1:27516013-27517013	LOC115255432::NW_021838687.1:28171620-28172620
320	LOC115255463::NW_021838687.1:53309604-53310604	LOC109419953::NW_021838687.1:53944104-53945104
321	LOC115255472::NW_021838687.1:60360206-60361206	LOC115255201::NW_021838687.1:59353457-59354457
322	LOC115255505::NW_021838687.1:79982077-79983077	LOC115255506::NW_021838687.1:79989818-79990818
323	LOC115255568::NW_021838687.1:48657317-48658317	LOC109420618::NW_021838687.1:49606146-49607146
324	LOC115255620::NW_021838688.1:557097-558097	LOC109405340::NW_021838688.1:1355524-1356524
325	LOC115255627::NW_021838688.1:1122385-1123385	LOC115255639::NW_021838688.1:1956944-1957944
326	LOC109405354::NW_021838688.1:1040124-1041124	LOC115255646::NW_021838688.1:2931910-2932910
327	LOC109412205::NW_021838699.1:1170494-1171494	LOC115255706::NW_021838699.1:1236645-1237645
328	LOC115255725::NW_021838699.1:4330756-4331756	LOC109412089::NW_021838699.1:5160521-5161521
329	LOC115255853::NW_021838719.1:305561-306561	LOC115255851::NW_021838719.1:151888-152888
330	LOC109408992::NW_021838743.1:8081-9081	LOC115256017::NW_021838743.1:3923446-3924446
331	LOC109426495::NW_021838743.1:222440-223440	LOC115256023::NW_021838743.1:4190791-4191791
332	LOC109414084::NW_021838754.1:301654-302654	LOC115256083::NW_021838754.1:874266-875266
333	LOC109414080::NW_021838754.1:317974-318974	LOC115256088::NW_021838754.1:888591-889591
334	LOC115256128::NW_021838755.1:279733-280733	LOC109410646::NW_021838465.1:97531335-97532335
335	LOC115256198::NW_021837046.1:55679826-55680826	LOC115256206::NW_021837046.1:56606379-56607379
336	LOC115256237::NW_021838787.1:786323-787323	LOC109421246::NW_021838787.1:1838964-1839964
337	LOC115256256::NW_021838787.1:181472-182472	LOC109410819::NW_021838395.1:913492-914492
338	LOC115256404::NW_021838798.1:61028501-61029501	LOC109428498::NW_021838798.1:61040614-61041614
339	LOC115256435::NW_021837046.1:4629555-4630555	LOC115254960::NW_021838687.1:6311725-6312725
340	LOC115256472::NW_021838798.1:3500577-3501577	LOC109398413::NW_021838798.1:3994555-3995555
341	LOC115256496::NW_021838798.1:28393881-28394881	LOC109422020::NW_021838798.1:29147702-29148702
342	LOC115256548::NW_021838798.1:61037384-61038384	LOC109430064::NW_021838798.1:61045796-61046796
343	LOC115256555::NW_021838798.1:3745050-3746050	LOC109398413::NW_021838798.1:3994555-3995555
344	LOC115255481::NW_021837046.1:5326295-5327295	LOC115256635::NW_021838798.1:7760417-7761417
345	LOC115256647::NW_021838798.1:48375626-48376626	LOC109402618::NW_021838798.1:49919438-49920438
346	LOC115256674::NW_021838798.1:23628810-23629810	LOC115256547::NW_021838798.1:23632535-23633535
347	LOC115256774::NW_021838798.1:62054928-62055928	LOC109428498::NW_021838798.1:61040614-61041614
348	LOC115256839::NW_021838798.1:61479371-61480371	LOC109428491::NW_021838798.1:62501964-62502964
349	LOC115256948::NW_021838804.1:265410-266410	LOC109407623::NW_021838465.1:129553016-129554016
350	LOC115256988::NW_021838810.1:1624328-1625328	LOC109420915::NW_021837931.1:25237345-25238345
351	LOC115257029::NW_021838821.1:18323-19323	LOC109426897::NW_021837489.1:30435511-30436511
352	LOC115257056::NW_021837046.1:18738906-18739906	LOC109398811::NW_021837046.1:18840243-18841243
353	LOC115257207::NW_021838865.1:833594-834594	LOC115254472::NW_021838621.1:5560273-5561273
354	LOC109408803::NW_021838153.1:34204749-34205749	LOC115257208::NW_021838865.1:169273-170273
355	LOC115257208::NW_021838865.1:169273-170273	LOC109426711::NW_021838153.1:9328464-9329464
356	LOC115257322::NW_021838896.1:56660-57660	LOC109403335::NW_021837267.1:8971685-8972685
357	LOC115257327::NW_021838898.1:2869969-2870969	LOC115256439::NW_021838798.1:59922072-59923072
358	LOC109428616::NW_021837136.1:28859-29859	LOC115257329::NW_021838898.1:2895964-2896964
359	LOC115257415::NW_021838909.1:7462964-7463964	LOC115255149::NW_021838687.1:49700225-49701225
360	LOC109429947::NW_021838909.1:6796470-6797470	LOC115257422::NW_021838909.1:7612894-7613894
361	LOC115257440::NW_021838909.1:70526829-70527829	LOC109433178::NW_021838909.1:61302072-61303072
362	LOC115257456::NW_021837046.1:29994101-29995101	LOC109400991::NW_021837046.1:32169416-32170416
363	LOC109418692::NW_021839193.1:82553-83553	LOC115257489::NW_021838909.1:29307715-29308715
364	LOC109430749::NW_021838598.1:255022-256022	LOC115257514::NW_021838909.1:9693484-9694484
365	LOC109403448::NW_021838909.1:78734149-78735149	LOC115257534::NW_021838909.1:80231393-80232393
366	LOC115257473::NW_021838909.1:77720279-77721279	LOC115257570::NW_021838909.1:77742598-77743598
367	LOC115257610::NW_021838909.1:74433581-74434581	LOC115257554::NW_021838909.1:74447343-74448343
368	LOC115257627::NW_021838909.1:60389365-60390365	LOC109420394::NW_021838909.1:64921739-64922739
369	LOC115257652::NW_021838909.1:2228979-2229979	LOC109430221::NW_021838909.1:3621962-3622962
370	LOC115257717::NW_021838909.1:32325379-32326379	LOC109415957::NW_021838909.1:33149862-33150862
371	LOC115257747::NW_021837046.1:35220762-35221762	LOC109407802::NW_021837046.1:38809694-38810694
372	LOC115257758::NW_021838909.1:61751531-61752531	LOC115257551::NW_021838909.1:70976962-70977962
373	LOC115257761::NW_021838909.1:61789966-61790966	LOC115253571::NW_021838909.1:69528591-69529591
374	LOC109408247::NW_021838832.1:1221112-1222112	LOC115257791::NW_021838909.1:41982646-41983646
375	LOC115257800::NW_021838909.1:31797922-31798922	LOC115257804::NW_021838909.1:34569212-34570212
376	LOC109399985::NW_021838909.1:75844885-75845885	LOC115257866::NW_021838909.1:85508414-85509414
377	LOC115257872::NW_021838909.1:92135675-92136675	LOC109407714::NW_021838465.1:108498251-108499251
378	LOC115257422::NW_021838909.1:7612894-7613894	LOC115257901::NW_021838909.1:10764940-10765940
379	LOC115257956::NW_021837046.1:41244944-41245944	LOC109622862::NW_021837046.1:42620025-42621025
380	LOC115258013::NW_021838919.1:13290-14290	LOC109622876::NW_021837046.1:44376540-44377540
381	LOC115258029::NW_021838921.1:3131476-3132476	LOC115258030::NW_021838921.1:3147629-3148629
382	LOC115258129::NW_021838939.1:83804-84804	LOC109430717::NW_021838909.1:7944354-7945354
383	LOC115258177::NW_021838948.1:129374-130374	LOC109411177::NW_021838432.1:695373-696373
384	LOC115258183::NW_021838953.1:106592-107592	LOC109407892::NW_021838576.1:89470006-89471006
385	LOC115258275::NW_021838976.1:1207456-1208456	LOC109406378::NW_021838976.1:1865100-1866100
386	LOC115258472::NW_021839020.1:41388265-41389265	LOC109406828::NW_021839020.1:40661630-40662630
387	LOC109421041::NW_021838736.1:47294-48294	LOC115258570::NW_021839020.1:61928855-61929855
388	LOC115258576::NW_021837046.1:51869319-51870319	LOC109622904::NW_021837046.1:52599025-52600025
389	LOC109406828::NW_021839020.1:40661630-40662630	LOC115258619::NW_021839020.1:42421635-42422635
390	LOC109409302::NW_021839020.1:3957891-3958891	LOC115258653::NW_021839020.1:8081251-8082251
391	LOC115258782::NW_021839020.1:61516774-61517774	LOC109421473::NW_021839130.1:62101428-62102428
392	LOC109429119::NW_021838479.1:672888-673888	LOC115258794::NW_021839020.1:59122325-59123325
393	LOC115258785::NW_021839020.1:61975815-61976815	LOC115258806::NW_021839020.1:61979008-61980008
394	LOC109410106::NW_021837267.1:3773161-3774161	LOC115258818::NW_021839020.1:76892205-76893205
395	LOC109417522::NW_021839020.1:79077869-79078869	LOC115258845::NW_021839020.1:79241129-79242129
396	LOC109417525::NW_021839020.1:79628260-79629260	LOC115258889::NW_021839020.1:80181519-80182519
397	LOC109410213::NW_021839020.1:79648986-79649986	LOC115258890::NW_021839020.1:80203441-80204441
398	LOC109410214::NW_021839020.1:79650702-79651702	LOC115258891::NW_021839020.1:80205158-80206158
399	LOC109417528::NW_021839020.1:81535142-81536142	LOC115258891::NW_021839020.1:80205158-80206158
400	LOC109417526::NW_021839020.1:79627657-79628657	LOC115258892::NW_021839020.1:80180916-80181916
401	LOC115258940::NW_021839020.1:22965402-22966402	LOC109418447::NW_021839020.1:26967859-26968859
402	LOC115259047::NW_021837046.1:58799162-58800162	LOC115259056::NW_021837046.1:58813568-58814568
403	LOC115259212::NW_021839065.1:1518151-1519151	LOC109423655::NW_021839065.1:1852608-1853608
404	LOC115259273::NW_021839086.1:350889-351889	LOC109430927::NW_021839086.1:717807-718807
405	LOC115259368::NW_021839119.1:451528-452528	LOC109409509::NW_021837046.1:56938367-56939367
406	LOC115259459::NW_021839130.1:59664044-59665044	LOC115259462::NW_021839130.1:61103685-61104685
407	LOC109412731::NW_021839130.1:59499056-59500056	LOC115259469::NW_021839130.1:60981858-60982858
408	LOC109433466::NW_021837888.1:1194962-1195962	LOC115259542::NW_021839130.1:17431008-17432008
409	LOC109429308::NW_021837711.1:2477966-2478966	LOC115259583::NW_021839130.1:24889967-24890967
410	LOC115259606::NW_021839130.1:10396779-10397779	LOC109420587::NW_021837378.1:41337452-41338452
411	LOC115258299::NW_021837045.1:13334506-13335506	LOC115259623::NW_021837048.1:90864-91864
412	LOC109622705::NW_021839130.1:13279020-13280020	LOC115259702::NW_021839130.1:13667616-13668616
413	LOC115259586::NW_021839130.1:51312383-51313383	LOC115259767::NW_021839130.1:51659534-51660534
414	LOC109412730::NW_021839130.1:59480675-59481675	LOC115259783::NW_021839130.1:60963093-60964093
415	LOC115260030::NW_021839177.1:11690-12690	LOC109411496::NW_021837822.1:19310742-19311742
416	LOC115260148::NW_021839230.1:1587464-1588464	LOC109409781::NW_021837045.1:34967965-34968965
417	LOC115260226::NW_021837083.1:107879-108879	LOC109400056::NW_021838610.1:3717748-3718748
418	LOC109432629::NW_021838666.1:369320-370320	LOC115260607::NW_021837045.1:56057730-56058730
419	LOC115260620::NW_021837156.1:20518566-20519566	LOC109422800::NW_021837156.1:21043719-21044719
420	LOC109422801::NW_021837156.1:20504168-20505168	LOC115260628::NW_021837156.1:21015057-21016057
421	LOC109415796::NW_021838909.1:37166602-37167602	LOC115260638::NW_021837045.1:59361582-59362582
422	LOC115260643::NW_021837045.1:59508066-59509066	LOC115260640::NW_021837045.1:59472475-59473475
423	LOC115260667::NW_021837045.1:66374086-66375086	LOC115254153::NW_021837045.1:66899251-66900251
424	LOC115260702::NW_021837156.1:49460185-49461185	LOC109427777::NW_021837156.1:51078804-51079804
425	LOC115260500::NW_021837156.1:49378700-49379700	LOC115260702::NW_021837156.1:49460185-49461185
426	LOC109419911::NW_021838443.1:9249383-9250383	LOC115260722::NW_021837156.1:51771586-51772586
427	LOC109427666::NW_021837156.1:54719681-54720681	LOC115260732::NW_021837156.1:56296393-56297393
428	LOC109403491::NW_021838559.1:473701-474701	LOC115260772::NW_021837156.1:16220221-16221221
429	LOC115260806::NW_021837166.1:80477-81477	LOC115257388::NW_021838909.1:83046832-83047832
430	LOC115260910::NW_021837199.1:46653-47653	LOC109415593::NW_021837156.1:59235857-59236857
431	LOC115260849::NW_021837045.1:88414917-88415917	LOC115260912::NW_021837045.1:93345552-93346552
432	LOC115260992::NW_021837230.1:10086-11086	LOC109422692::NW_021838599.1:1239785-1240785
433	LOC115261021::NW_021837234.1:905435-906435	LOC109430156::NW_021837234.1:1184824-1185824
434	LOC109424936::NW_021838610.1:558886-559886	LOC115261128::NW_021837045.1:112890955-112891955
435	LOC115257611::NW_021838909.1:21702484-21703484	LOC115261128::NW_021837045.1:112890955-112891955
436	LOC115261205::NW_021837267.1:2940079-2941079	LOC109622892::NW_021837046.1:50593445-50594445
437	LOC109406152::NW_021837267.1:3842582-3843582	LOC115261211::NW_021837267.1:4556702-4557702
438	LOC109621522::NW_021837267.1:6421624-6422624	LOC115261229::NW_021837267.1:6484077-6485077
439	LOC115261230::NW_021837267.1:6444428-6445428	LOC115261229::NW_021837267.1:6484077-6485077
440	LOC115261231::NW_021837267.1:6476970-6477970	LOC115261229::NW_021837267.1:6484077-6485077
441	LOC109621522::NW_021837267.1:6421624-6422624	LOC115261232::NW_021837267.1:6501884-6502884
442	LOC115261229::NW_021837267.1:6484077-6485077	LOC115261232::NW_021837267.1:6501884-6502884
443	LOC115261230::NW_021837267.1:6444428-6445428	LOC115261232::NW_021837267.1:6501884-6502884
444	LOC115261231::NW_021837267.1:6476970-6477970	LOC115261232::NW_021837267.1:6501884-6502884
445	LOC115261233::NW_021837267.1:6451528-6452528	LOC115261229::NW_021837267.1:6484077-6485077
446	LOC115261233::NW_021837267.1:6451528-6452528	LOC115261232::NW_021837267.1:6501884-6502884
447	LOC115261234::NW_021837267.1:6384088-6385088	LOC115261229::NW_021837267.1:6484077-6485077
448	LOC115261234::NW_021837267.1:6384088-6385088	LOC115261232::NW_021837267.1:6501884-6502884
449	LOC115261235::NW_021837267.1:6464006-6465006	LOC115261232::NW_021837267.1:6501884-6502884
450	LOC109417477::NW_021837267.1:6472827-6473827	LOC115261249::NW_021837267.1:6555686-6556686
451	LOC115261239::NW_021837267.1:6440319-6441319	LOC115261249::NW_021837267.1:6555686-6556686
452	LOC115261240::NW_021837267.1:6488852-6489852	LOC115261249::NW_021837267.1:6555686-6556686
453	LOC115261241::NW_021837267.1:6497756-6498756	LOC115261249::NW_021837267.1:6555686-6556686
454	LOC115261242::NW_021837267.1:6548572-6549572	LOC115261249::NW_021837267.1:6555686-6556686
455	LOC115261243::NW_021837267.1:6479959-6480959	LOC115261249::NW_021837267.1:6555686-6556686
456	LOC115261244::NW_021837267.1:6504873-6505873	LOC115261249::NW_021837267.1:6555686-6556686
457	LOC115261245::NW_021837267.1:6511972-6512972	LOC115261249::NW_021837267.1:6555686-6556686
458	LOC115261246::NW_021837267.1:6519418-6520418	LOC115261249::NW_021837267.1:6555686-6556686
459	LOC115261248::NW_021837267.1:6526520-6527520	LOC115261249::NW_021837267.1:6555686-6556686
460	LOC109417477::NW_021837267.1:6472827-6473827	LOC115261250::NW_021837267.1:6562796-6563796
461	LOC115261239::NW_021837267.1:6440319-6441319	LOC115261250::NW_021837267.1:6562796-6563796
462	LOC115261240::NW_021837267.1:6488852-6489852	LOC115261250::NW_021837267.1:6562796-6563796
463	LOC115261241::NW_021837267.1:6497756-6498756	LOC115261250::NW_021837267.1:6562796-6563796
464	LOC115261242::NW_021837267.1:6548572-6549572	LOC115261250::NW_021837267.1:6562796-6563796
465	LOC115261243::NW_021837267.1:6479959-6480959	LOC115261250::NW_021837267.1:6562796-6563796
466	LOC115261244::NW_021837267.1:6504873-6505873	LOC115261250::NW_021837267.1:6562796-6563796
467	LOC115261245::NW_021837267.1:6511972-6512972	LOC115261250::NW_021837267.1:6562796-6563796
468	LOC115261246::NW_021837267.1:6519418-6520418	LOC115261250::NW_021837267.1:6562796-6563796
469	LOC115261248::NW_021837267.1:6526520-6527520	LOC115261250::NW_021837267.1:6562796-6563796
470	LOC115261249::NW_021837267.1:6555686-6556686	LOC115261250::NW_021837267.1:6562796-6563796
471	LOC115261251::NW_021837267.1:6569890-6570890	LOC115261250::NW_021837267.1:6562796-6563796
472	LOC115261258::NW_021837267.1:6374740-6375740	LOC115261256::NW_021837267.1:6396828-6397828
473	LOC115261261::NW_021837267.1:6454517-6455517	LOC115261249::NW_021837267.1:6555686-6556686
474	LOC115261261::NW_021837267.1:6454517-6455517	LOC115261250::NW_021837267.1:6562796-6563796
475	LOC115261262::NW_021837267.1:6392942-6393942	LOC115261249::NW_021837267.1:6555686-6556686
476	LOC115261262::NW_021837267.1:6392942-6393942	LOC115261250::NW_021837267.1:6562796-6563796
477	LOC115261225::NW_021837267.1:6249283-6250283	LOC115261264::NW_021837267.1:6299148-6300148
478	LOC115261257::NW_021837267.1:6294198-6295198	LOC115261266::NW_021837267.1:6309535-6310535
479	LOC115261270::NW_021837267.1:6424613-6425613	LOC115261249::NW_021837267.1:6555686-6556686
480	LOC115261270::NW_021837267.1:6424613-6425613	LOC115261250::NW_021837267.1:6562796-6563796
481	LOC115261271::NW_021837267.1:6533969-6534969	LOC115261249::NW_021837267.1:6555686-6556686
482	LOC115261271::NW_021837267.1:6533969-6534969	LOC115261250::NW_021837267.1:6562796-6563796
483	LOC115261228::NW_021837267.1:6575355-6576355	LOC115261273::NW_021837267.1:6568262-6569262
484	LOC115261268::NW_021837267.1:6545159-6546159	LOC115261273::NW_021837267.1:6568262-6569262
485	LOC115261275::NW_021837267.1:6532342-6533342	LOC115261273::NW_021837267.1:6568262-6569262
486	LOC115261276::NW_021837267.1:6503246-6504246	LOC115261273::NW_021837267.1:6568262-6569262
487	LOC115261277::NW_021837267.1:6510345-6511345	LOC115261273::NW_021837267.1:6568262-6569262
488	LOC115261278::NW_021837267.1:6517791-6518791	LOC115261273::NW_021837267.1:6568262-6569262
489	LOC115261279::NW_021837267.1:6524893-6525893	LOC115261273::NW_021837267.1:6568262-6569262
490	LOC115261280::NW_021837267.1:6554059-6555059	LOC115261273::NW_021837267.1:6568262-6569262
491	LOC115261268::NW_021837267.1:6545159-6546159	LOC115261281::NW_021837267.1:6561169-6562169
492	LOC115261281::NW_021837267.1:6561169-6562169	LOC115261273::NW_021837267.1:6568262-6569262
493	LOC115261275::NW_021837267.1:6532342-6533342	LOC115261281::NW_021837267.1:6561169-6562169
494	LOC115261276::NW_021837267.1:6503246-6504246	LOC115261281::NW_021837267.1:6561169-6562169
495	LOC115261277::NW_021837267.1:6510345-6511345	LOC115261281::NW_021837267.1:6561169-6562169
496	LOC115261278::NW_021837267.1:6517791-6518791	LOC115261281::NW_021837267.1:6561169-6562169
497	LOC115261279::NW_021837267.1:6524893-6525893	LOC115261281::NW_021837267.1:6561169-6562169
498	LOC115261280::NW_021837267.1:6554059-6555059	LOC115261281::NW_021837267.1:6561169-6562169
499	LOC109403619::NW_021837931.1:1700265-1701265	LOC115261313::NW_021837267.1:12253961-12254961
500	LOC109403275::NW_021838563.1:239204-240204	LOC115261315::NW_021837267.1:12354085-12355085
501	LOC115260082::NW_021839197.1:746201-747201	LOC115261360::NW_021837267.1:22639246-22640246
502	LOC109429217::NW_021839197.1:1008387-1009387	LOC115261363::NW_021837267.1:22846545-22847545
503	LOC109409010::NW_021837267.1:32863386-32864386	LOC115261401::NW_021837267.1:33635304-33636304
504	LOC109429124::NW_021837267.1:33032403-33033403	LOC115261402::NW_021837267.1:33788968-33789968
505	LOC115255518::NW_021838687.1:91478975-91479975	LOC115261405::NW_021837045.1:138434935-138435935
506	LOC115261420::NW_021837267.1:36101366-36102366	LOC109427242::NW_021837267.1:38665762-38666762
507	LOC109411636::NW_021837123.1:1638180-1639180	LOC115261433::NW_021837267.1:37185209-37186209
508	LOC109411619::NW_021837267.1:35443700-35444700	LOC115261440::NW_021837267.1:37894333-37895333
509	LOC115261474::NW_021837267.1:45042659-45043659	LOC109406317::NW_021837267.1:45111635-45112635
510	LOC115261497::NW_021837045.1:149576223-149577223	LOC115261499::NW_021837045.1:149582532-149583532
511	LOC109416160::NW_021837379.1:1023665-1024665	LOC115261539::NW_021837267.1:54519942-54520942
512	LOC115261559::NW_021837267.1:56426508-56427508	LOC109416618::NW_021837267.1:58397053-58398053
513	LOC109432819::NW_021837267.1:55314359-55315359	LOC115261572::NW_021837267.1:58281376-58282376
514	LOC109416616::NW_021837267.1:56732159-56733159	LOC115261574::NW_021837267.1:58448171-58449171
515	LOC115261592::NW_021837267.1:6445790-6446790	LOC115261273::NW_021837267.1:6568262-6569262
516	LOC115261592::NW_021837267.1:6445790-6446790	LOC115261281::NW_021837267.1:6561169-6562169
517	LOC115261255::NW_021837267.1:6440958-6441958	LOC115261594::NW_021837267.1:6480598-6481598
518	LOC115261595::NW_021837267.1:6485439-6486439	LOC115261273::NW_021837267.1:6568262-6569262
519	LOC115261595::NW_021837267.1:6485439-6486439	LOC115261281::NW_021837267.1:6561169-6562169
520	LOC115261255::NW_021837267.1:6440958-6441958	LOC115261597::NW_021837267.1:6563435-6564435
521	LOC115261289::NW_021837267.1:6871364-6872364	LOC115261597::NW_021837267.1:6563435-6564435
522	LOC115261594::NW_021837267.1:6480598-6481598	LOC115261597::NW_021837267.1:6563435-6564435
523	LOC115261621::NW_021837267.1:25739736-25740736	LOC109398786::NW_021837267.1:29331794-29332794
524	LOC115258858::NW_021839020.1:29740717-29741717	LOC115261651::NW_021837267.1:52895900-52896900
525	LOC115261678::NW_021837268.1:157534-158534	LOC109418683::NW_021837156.1:34736178-34737178
526	LOC115261757::NW_021837294.1:65968-66968	LOC109422596::NW_021838576.1:1417157-1418157
527	LOC109402861::NW_021839124.1:11967-12967	LOC115261823::NW_021837045.1:187832394-187833394
528	LOC115262053::NW_021837378.1:1903849-1904849	LOC109406528::NW_021837378.1:1796733-1797733
529	LOC109406541::NW_021837378.1:1601952-1602952	LOC115262110::NW_021837378.1:14140978-14141978
530	LOC109406528::NW_021837378.1:1796733-1797733	LOC115262112::NW_021837378.1:14344180-14345180
531	LOC109418321::NW_021837045.1:527846-528846	LOC115262136::NW_021837045.1:1858123-1859123
532	LOC109426199::NW_021837045.1:21899032-21900032	LOC115262178::NW_021837045.1:24576536-24577536
533	LOC115262224::NW_021837378.1:55167977-55168977	LOC109425769::NW_021837378.1:55373235-55374235
534	LOC115259623::NW_021837048.1:90864-91864	LOC115262248::NW_021837378.1:14286594-14287594
535	LOC109427772::NW_021838493.1:605682-606682	LOC115262469::NW_021837467.1:791509-792509
536	LOC109427045::NW_021837112.1:1967239-1968239	LOC115262670::NW_021837489.1:21256283-21257283
537	LOC115262666::NW_021837489.1:20770806-20771806	LOC115262674::NW_021837489.1:24766288-24767288
538	LOC115262699::NW_021837489.1:32351646-32352646	LOC109623311::NW_021837489.1:33582357-33583357
539	LOC109623382::NW_021837489.1:32158392-32159392	LOC115262704::NW_021837489.1:33349100-33350100
540	LOC109623307::NW_021837489.1:32445963-32446963	LOC115262709::NW_021837489.1:33684188-33685188
541	LOC115262749::NW_021837489.1:41371346-41372346	LOC109407900::NW_021837489.1:43883006-43884006
542	LOC109413556::NW_021837489.1:41381207-41382207	LOC115262757::NW_021837489.1:43893625-43894625
543	LOC115262813::NW_021837489.1:35475783-35476783	LOC115262818::NW_021837489.1:35489610-35490610
544	LOC115262817::NW_021837489.1:35484914-35485914	LOC115262818::NW_021837489.1:35489610-35490610
545	LOC115262868::NW_021837497.1:2959-3959	LOC109415278::NW_021838715.1:71103-72103
546	LOC115262908::NW_021837523.1:1495852-1496852	LOC115258579::NW_021839020.1:6370682-6371682
547	LOC109418397::NW_021837045.1:11519250-11520250	LOC115262950::NW_021837045.1:14075668-14076668
548	LOC109423380::NW_021839165.1:37427-38427	LOC115262956::NW_021837545.1:449178-450178
549	LOC115262979::NW_021837045.1:32744935-32745935	LOC115258764::NW_021839020.1:70025135-70026135
550	LOC115263030::NW_021837578.1:962410-963410	LOC109414253::NW_021839020.1:81044362-81045362
551	LOC115263032::NW_021837578.1:1059382-1060382	LOC109417534::NW_021837578.1:1097829-1098829
552	LOC115263048::NW_021837589.1:761325-762325	LOC115263051::NW_021837589.1:761325-762325
553	LOC109424182::NW_021837600.1:20066985-20067985	LOC115263093::NW_021837600.1:22819632-22820632
554	LOC115263151::NW_021837600.1:1361445-1362445	LOC109431739::NW_021837600.1:2288080-2289080
555	LOC115263196::NW_021837600.1:15926935-15927935	LOC109424155::NW_021837600.1:16504367-16505367
556	LOC109430839::NW_021837600.1:15095262-15096262	LOC115263215::NW_021837600.1:18121160-18122160
557	LOC109430804::NW_021837600.1:20153193-20154193	LOC115263238::NW_021837600.1:22940463-22941463
558	LOC109430805::NW_021837600.1:20155207-20156207	LOC115263239::NW_021837600.1:22942478-22943478
559	LOC115263245::NW_021837600.1:25819116-25820116	LOC115255559::NW_021838687.1:43552340-43553340
560	LOC115263258::NW_021837600.1:31231537-31232537	LOC109432574::NW_021837045.1:142451339-142452339
561	LOC109418596::NW_021838153.1:16527-17527	LOC115263330::NW_021837600.1:2180739-2181739
562	LOC109426888::NW_021838991.1:70502-71502	LOC115263334::NW_021837600.1:6956148-6957148
563	LOC115263358::NW_021837600.1:17706869-17707869	LOC109404515::NW_021837045.1:106123116-106124116
564	LOC109430775::NW_021837600.1:20032308-20033308	LOC115263362::NW_021837600.1:22775520-22776520
565	LOC115263429::NW_021837623.1:1074723-1075723	LOC109399190::NW_021838153.1:96784955-96785955
566	LOC115263678::NW_021837711.1:1010871-1011871	LOC115256825::NW_021838798.1:24994854-24995854
567	LOC109432198::NW_021837711.1:13179085-13180085	LOC115263717::NW_021837711.1:16350954-16351954
568	LOC115262275::NW_021837379.1:120792-121792	LOC115263719::NW_021837711.1:16568546-16569546
569	LOC109425439::NW_021837711.1:13910073-13911073	LOC115263724::NW_021837711.1:17006173-17007173
570	LOC109432147::NW_021837711.1:11042276-11043276	LOC115263729::NW_021837711.1:20014522-20015522
571	LOC115263732::NW_021837711.1:20911573-20912573	LOC115254915::NW_021838687.1:80488531-80489531
572	LOC115263799::NW_021837711.1:14848034-14849034	LOC115256750::NW_021838798.1:50924620-50925620
573	LOC109422451::NW_021838754.1:51324-52324	LOC115263801::NW_021837711.1:15224300-15225300
574	LOC115255836::NW_021838715.1:71534-72534	LOC115263804::NW_021837711.1:15626263-15627263
575	LOC109621764::NW_021838715.1:73274-74274	LOC115263805::NW_021837711.1:15627996-15628996
576	LOC109423472::NW_021837711.1:11085357-11086357	LOC115263811::NW_021837711.1:20045866-20046866
577	LOC109427900::NW_021837767.1:204043-205043	LOC115263996::NW_021837767.1:894419-895419
578	LOC109414598::NW_021837822.1:30005117-30006117	LOC115264072::NW_021837822.1:31292177-31293177
579	LOC109398580::NW_021838954.1:2903797-2904797	LOC115264133::NW_021837822.1:8412111-8413111
580	LOC115264133::NW_021837822.1:8412111-8413111	LOC115264142::NW_021837822.1:10456014-10457014
581	LOC109411044::NW_021838482.1:256125-257125	LOC115264163::NW_021837822.1:13711035-13712035
582	LOC109416069::NW_021837822.1:24091638-24092638	LOC115264192::NW_021837822.1:24735595-24736595
583	LOC109414592::NW_021837822.1:30088475-30089475	LOC115264211::NW_021837822.1:31364281-31365281
584	LOC115264252::NW_021837822.1:35382424-35383424	LOC109413361::NW_021837822.1:35597249-35598249
585	LOC115264256::NW_021837822.1:35245251-35246251	LOC109413389::NW_021837822.1:35628667-35629667
586	LOC115264262::NW_021837822.1:35330171-35331171	LOC109413389::NW_021837822.1:35628667-35629667
587	LOC109403935::NW_021837822.1:35496722-35497722	LOC115264268::NW_021837822.1:35695645-35696645
588	LOC115264270::NW_021837822.1:35303104-35304104	LOC115264269::NW_021837822.1:35383209-35384209
589	LOC115264419::NW_021837845.1:98611-99611	LOC115256670::NW_021838798.1:75414318-75415318
590	LOC109426103::NW_021838933.1:163504-164504	LOC115264449::NW_021837045.1:36015750-36016750
591	LOC109397643::NW_021838518.1:508870-509870	LOC115264467::NW_021837045.1:36094833-36095833
592	LOC115264536::NW_021837931.1:1304024-1305024	LOC109400174::NW_021837931.1:5180228-5181228
593	LOC115264537::NW_021837931.1:1640160-1641160	LOC115259067::NW_021837046.1:58969266-58970266
594	LOC115264538::NW_021837931.1:1636416-1637416	LOC109405347::NW_021837931.1:3658794-3659794
595	LOC109431230::NW_021837931.1:18200083-18201083	LOC115264615::NW_021837931.1:18694269-18695269
596	LOC115264607::NW_021837931.1:18262157-18263157	LOC115264629::NW_021837931.1:18703860-18704860
597	LOC115264657::NW_021837931.1:25284031-25285031	LOC109412635::NW_021837931.1:25315460-25316460
598	LOC109401535::NW_021837931.1:23937745-23938745	LOC115264686::NW_021837931.1:32539305-32540305
599	LOC115259959::NW_021839153.1:1551329-1552329	LOC115264697::NW_021837931.1:36076505-36077505
600	LOC109405779::NW_021837931.1:1778006-1779006	LOC115264713::NW_021837931.1:3812976-3813976
601	LOC115253860::NW_021837965.1:951305-952305	LOC115264836::NW_021837965.1:1035922-1036922
602	LOC109409006::NW_021838042.1:16046437-16047437	LOC115264943::NW_021838042.1:19812536-19813536
603	LOC115265017::NW_021838043.1:446642-447642	LOC109425728::NW_021837545.1:520706-521706
604	LOC115265054::NW_021838076.1:779416-780416	LOC109404300::NW_021838576.1:91751808-91752808
605	LOC115265072::NW_021838076.1:1043569-1044569	LOC109403093::NW_021838576.1:91779096-91780096
606	LOC115265140::NW_021838153.1:46386631-46387631	LOC115260638::NW_021837045.1:59361582-59362582
607	LOC109412341::NW_021838343.1:2942363-2943363	LOC115265150::NW_021838153.1:60712331-60713331
608	LOC115265176::NW_021838153.1:98822504-98823504	LOC115263799::NW_021837711.1:14848034-14849034
609	LOC115265236::NW_021838153.1:17157-18157	LOC115263152::NW_021837600.1:2181369-2182369
610	LOC109426674::NW_021838153.1:16153456-16154456	LOC115265274::NW_021838153.1:18434931-18435931
611	LOC109426672::NW_021838153.1:16175362-16176362	LOC115265276::NW_021838153.1:18539957-18540957
612	LOC115265295::NW_021838153.1:24675432-24676432	LOC109426918::NW_021838153.1:25640138-25641138
613	LOC109419927::NW_021838576.1:28827164-28828164	LOC115265360::NW_021838153.1:53842553-53843553
614	LOC115265378::NW_021838153.1:60082160-60083160	LOC109401747::NW_021838153.1:60094412-60095412
615	LOC109402257::NW_021838366.1:536309-537309	LOC115265434::NW_021837045.1:59469344-59470344
616	LOC115265434::NW_021837045.1:59469344-59470344	LOC115265435::NW_021837045.1:59504934-59505934
617	LOC109407714::NW_021838465.1:108498251-108499251	LOC115265503::NW_021838153.1:115187790-115188790
618	LOC109419927::NW_021838576.1:28827164-28828164	LOC115265503::NW_021838153.1:115187790-115188790
619	LOC109432869::NW_021837845.1:970528-971528	LOC115265503::NW_021838153.1:115187790-115188790
620	LOC109622914::NW_021838153.1:143402114-143403114	LOC115265503::NW_021838153.1:115187790-115188790
621	LOC115264298::NW_021837822.1:7119801-7120801	LOC115265503::NW_021838153.1:115187790-115188790
622	LOC115265360::NW_021838153.1:53842553-53843553	LOC115265503::NW_021838153.1:115187790-115188790
623	LOC115265513::NW_021838153.1:117753972-117754972	LOC109432552::NW_021838153.1:124763585-124764585
624	LOC109409158::NW_021838821.1:1007870-1008870	LOC115265579::NW_021838153.1:131660454-131661454
625	LOC115261182::NW_021837267.1:50592990-50593990	LOC115265579::NW_021838153.1:131660454-131661454
626	LOC115265602::NW_021838153.1:148725880-148726880	LOC109423876::NW_021838153.1:151093119-151094119
627	LOC109423944::NW_021838153.1:156231516-156232516	LOC115265635::NW_021838153.1:157743828-157744828
628	LOC115254600::NW_021838643.1:981174-982174	LOC115265676::NW_021838153.1:20858542-20859542
629	LOC115260876::NW_021837045.1:90968035-90969035	LOC115265676::NW_021838153.1:20858542-20859542
630	LOC115265694::NW_021838153.1:17667499-17668499	LOC115265698::NW_021838153.1:18832076-18833076
631	LOC109426625::NW_021838153.1:17690184-17691184	LOC115265700::NW_021838153.1:18861234-18862234
632	LOC109403026::NW_021837378.1:44210971-44211971	LOC115265840::NW_021838153.1:130827061-130828061
633	LOC109424039::NW_021838540.1:302185-303185	LOC115266033::NW_021838154.1:780374-781374
634	LOC115260420::NW_021837145.1:873956-874956	LOC115266046::NW_021838154.1:4441129-4442129
635	LOC115266050::NW_021838154.1:5424956-5425956	LOC109404393::NW_021838154.1:7403372-7404372
636	LOC109416414::NW_021838608.1:137613-138613	LOC115266053::NW_021838154.1:5955215-5956215
637	LOC109424021::NW_021838154.1:2164502-2165502	LOC115266053::NW_021838154.1:5955215-5956215
638	LOC115253755::NW_021838154.1:4044640-4045640	LOC115266053::NW_021838154.1:5955215-5956215
639	LOC115266055::NW_021838154.1:6093232-6094232	LOC109418390::NW_021838154.1:7396835-7397835
640	LOC115264061::NW_021837811.1:696172-697172	LOC115266181::NW_021837045.1:85254533-85255533
641	LOC109427117::NW_021837045.1:88003276-88004276	LOC115266261::NW_021837045.1:89944798-89945798
642	LOC115266293::NW_021838233.1:3004823-3005823	LOC109414446::NW_021838233.1:3343294-3344294
643	LOC109414440::NW_021838233.1:3120782-3121782	LOC115266301::NW_021838233.1:3975555-3976555
644	LOC115266290::NW_021838233.1:2803859-2804859	LOC115266301::NW_021838233.1:3975555-3976555
645	LOC109414433::NW_021838233.1:2315299-2316299	LOC115266336::NW_021838233.1:9440732-9441732
646	LOC115266359::NW_021838233.1:14910084-14911084	LOC109418804::NW_021838576.1:100010334-100011334
647	LOC115266381::NW_021838233.1:19422571-19423571	LOC109428278::NW_021838233.1:20819229-20820229
648	LOC115266696::NW_021838343.1:20374536-20375536	LOC109397273::NW_021838729.1:233413-234413
649	LOC109399355::NW_021837700.1:25986-26986	LOC115266707::NW_021838355.1:1071972-1072972
650	LOC115266718::NW_021838366.1:539440-540440	LOC115260640::NW_021837045.1:59472475-59473475
651	LOC109401327::NW_021838453.1:699304-700304	LOC115266736::NW_021838382.1:777735-778735
652	LOC115266752::NW_021838385.1:998965-999965	LOC109412544::NW_021838576.1:102912465-102913465
653	LOC115266842::NW_021838391.1:587943-588943	LOC109408801::NW_021838465.1:9057372-9058372
654	LOC115266852::NW_021838393.1:250116-251116	LOC109409531::NW_021838524.1:596005-597005
655	LOC115266879::NW_021838396.1:462009-463009	LOC115266878::NW_021838396.1:470096-471096
656	LOC115266912::NW_021838399.1:200699-201699	LOC109408115::NW_021838399.1:2758328-2759328
657	LOC115266943::NW_021838399.1:12769952-12770952	LOC109422945::NW_021838576.1:111590942-111591942
658	LOC115266957::NW_021838399.1:7467003-7468003	LOC115266965::NW_021838399.1:11347651-11348651
659	LOC115266977::NW_021838401.1:965685-966685	LOC109621825::NW_021838576.1:23304561-23305561
660	LOC115266999::NW_021838406.1:212921-213921	LOC109423177::NW_021838632.1:1260371-1261371
661	LOC115267034::NW_021838410.1:12445244-12446244	LOC109403150::NW_021837045.1:62365462-62366462
662	LOC115267044::NW_021838410.1:5991367-5992367	LOC115267045::NW_021838410.1:5994585-5995585
663	LOC115267055::NW_021838410.1:7601067-7602067	LOC109399827::NW_021838410.1:8523068-8524068
664	LOC109425596::NW_021837045.1:116036909-116037909	LOC115267144::NW_021837045.1:116439728-116440728
665	LOC115267088::NW_021837045.1:115986713-115987713	LOC115267146::NW_021837045.1:116387734-116388734
666	LOC115267235::NW_021838421.1:10359533-10360533	LOC115264702::NW_021837931.1:36681377-36682377
667	LOC109417206::NW_021838423.1:631378-632378	LOC115267263::NW_021838423.1:850022-851022
668	LOC109411099::NW_021837045.1:118785015-118786015	LOC115267336::NW_021837045.1:119204772-119205772
669	LOC109416385::NW_021838432.1:8304001-8305001	LOC115267390::NW_021838432.1:9862772-9863772
670	LOC109416386::NW_021838432.1:9817598-9818598	LOC115267395::NW_021838432.1:11223175-11224175
671	LOC115267425::NW_021838437.1:388404-389404	LOC109421672::NW_021837822.1:26343633-26344633
672	LOC115267428::NW_021838438.1:57510-58510	LOC109432107::NW_021837965.1:780249-781249
673	LOC109430934::NW_021839086.1:794117-795117	LOC115267494::NW_021838443.1:5166044-5167044
674	LOC109431616::NW_021838443.1:40997-41997	LOC115267520::NW_021838443.1:9324209-9325209
675	LOC109399530::NW_021838454.1:485523-486523	LOC115267594::NW_021838454.1:2890451-2891451
676	LOC109426171::NW_021838454.1:5735223-5736223	LOC115267613::NW_021838454.1:7521555-7522555
677	LOC115260212::NW_021837075.1:77878-78878	LOC115267660::NW_021838460.1:675941-676941
678	LOC115261199::NW_021837267.1:1166880-1167880	LOC115267724::NW_021838465.1:8669280-8670280
679	LOC115267024::NW_021838410.1:2808586-2809586	LOC115267725::NW_021838465.1:8662532-8663532
680	LOC109428592::NW_021838510.1:7379739-7380739	LOC115267733::NW_021838465.1:10748100-10749100
681	LOC109408741::NW_021838465.1:6851913-6852913	LOC115267735::NW_021838465.1:10776377-10777377
682	LOC109408825::NW_021838465.1:6867437-6868437	LOC115267736::NW_021838465.1:10791865-10792865
683	LOC109408711::NW_021838465.1:14002588-14003588	LOC115267751::NW_021838465.1:17859908-17860908
684	LOC115267757::NW_021838465.1:18991632-18992632	LOC109411433::NW_021838465.1:20343291-20344291
685	LOC109397010::NW_021838461.1:490971-491971	LOC115267809::NW_021838465.1:36058300-36059300
686	LOC109409861::NW_021838465.1:28622413-28623413	LOC115267815::NW_021838465.1:38255687-38256687
687	LOC115267828::NW_021838465.1:44692725-44693725	LOC109400801::NW_021838465.1:45202727-45203727
688	LOC109402416::NW_021838887.1:2200900-2201900	LOC115267847::NW_021838465.1:50780475-50781475
689	LOC115264417::NW_021837845.1:843135-844135	LOC115267854::NW_021838465.1:54690294-54691294
690	LOC115267859::NW_021838465.1:56866936-56867936	LOC109410565::NW_021838465.1:57915659-57916659
691	LOC109408363::NW_021838465.1:72864514-72865514	LOC115267881::NW_021838465.1:73357210-73358210
692	LOC109409194::NW_021837378.1:49792826-49793826	LOC115267969::NW_021838465.1:103808064-103809064
693	LOC115267973::NW_021838465.1:105359884-105360884	LOC115267976::NW_021838465.1:105968575-105969575
694	LOC115268014::NW_021838465.1:114591974-114592974	LOC109426059::NW_021838465.1:115944689-115945689
695	LOC109401643::NW_021839130.1:48042957-48043957	LOC115268017::NW_021838465.1:115298694-115299694
696	LOC115268018::NW_021838465.1:6279371-6280371	LOC109426711::NW_021838153.1:9328464-9329464
697	LOC109426054::NW_021838465.1:116969947-116970947	LOC115268023::NW_021838465.1:118054749-118055749
698	LOC115260698::NW_021837156.1:48349032-48350032	LOC115268026::NW_021838465.1:118525879-118526879
699	LOC115268031::NW_021838465.1:119829854-119830854	LOC109426019::NW_021838465.1:123680695-123681695
700	LOC109426018::NW_021838465.1:119863172-119864172	LOC115268051::NW_021838465.1:123699020-123700020
701	LOC109425976::NW_021838465.1:125229046-125230046	LOC115268083::NW_021838465.1:134186942-134187942
702	LOC115268136::NW_021838465.1:56063537-56064537	LOC115268139::NW_021838465.1:56439139-56440139
703	LOC115268150::NW_021838465.1:66020079-66021079	LOC109419980::NW_021838465.1:114408575-114409575
704	LOC115265348::NW_021838153.1:51635288-51636288	LOC115268187::NW_021838465.1:104382558-104383558
705	LOC109621439::NW_021837204.1:74147-75147	LOC115268350::NW_021838465.1:108621911-108622911
706	LOC115268457::NW_021837045.1:143550204-143551204	LOC109409584::NW_021837045.1:144975698-144976698
707	LOC109411602::NW_021838466.1:4229337-4230337	LOC115268529::NW_021838466.1:4916553-4917553
708	LOC115268534::NW_021838466.1:7739285-7740285	LOC109422909::NW_021838909.1:81236564-81237564
709	LOC115268557::NW_021838468.1:283211-284211	LOC115263234::NW_021837600.1:21741785-21742785
710	LOC115268567::NW_021838470.1:343190-344190	LOC109426615::NW_021838687.1:65117985-65118985
711	LOC115268685::NW_021838482.1:194390-195390	LOC109398586::NW_021837822.1:13645858-13646858
712	LOC115268768::NW_021838494.1:246699-247699	LOC109424591::NW_021838798.1:55989626-55990626
713	LOC115268782::NW_021838495.1:39055-40055	LOC109407094::NW_021838987.1:1293051-1294051
714	LOC109399803::NW_021838718.1:1196-2196	LOC115268788::NW_021838497.1:18058-19058
715	LOC115268813::NW_021838499.1:6986422-6987422	LOC115259067::NW_021837046.1:58969266-58970266
716	LOC109621778::NW_021838499.1:7725756-7726756	LOC115268824::NW_021838499.1:7912775-7913775
717	LOC115268836::NW_021838499.1:4334484-4335484	LOC109404515::NW_021837045.1:106123116-106124116
718	LOC115268849::NW_021838499.1:16649-17649	LOC115268830::NW_021838499.1:508105-509105
719	LOC115268875::NW_021838503.1:661985-662985	LOC115257165::NW_021838854.1:1981437-1982437
720	LOC115268886::NW_021838504.1:381391-382391	LOC109426333::NW_021838932.1:1689055-1690055
721	LOC115268980::NW_021838512.1:364199-365199	LOC109426568::NW_021838153.1:19775419-19776419
722	LOC109432607::NW_021838521.1:1475206-1476206	LOC115269098::NW_021838521.1:6737854-6738854
723	LOC115269146::NW_021838526.1:338144-339144	LOC115256800::NW_021838798.1:70344649-70345649
724	LOC115269152::NW_021838528.1:10630-11630	LOC109427440::NW_021838798.1:22132859-22133859
725	LOC115269202::NW_021837045.1:157241251-157242251	LOC109413932::NW_021837045.1:161744810-161745810
726	LOC115269264::NW_021838541.1:9367-10367	LOC109423138::NW_021838541.1:39440-40440
727	LOC115269304::NW_021838543.1:726500-727500	LOC115265401::NW_021838153.1:70641720-70642720
728	LOC109623211::NW_021838543.1:3862669-3863669	LOC115269315::NW_021838543.1:4156991-4157991
729	LOC115269319::NW_021838543.1:4386297-4387297	LOC109408278::NW_021838543.1:5355975-5356975
730	LOC115269342::NW_021838544.1:563455-564455	LOC115261838::NW_021837323.1:692263-693263
731	LOC115269353::NW_021838547.1:18057-19057	LOC115255312::NW_021838687.1:23229540-23230540
732	LOC109428818::NW_021838904.1:17891-18891	LOC115269394::NW_021838554.1:2357781-2358781
733	LOC115255851::NW_021838719.1:151888-152888	LOC115269399::NW_021838554.1:4980286-4981286
734	LOC115269452::NW_021838555.1:155584-156584	LOC109398594::NW_021837822.1:13618610-13619610
735	LOC115269458::NW_021838557.1:72812-73812	LOC109427935::NW_021838491.1:625520-626520
736	LOC115268169::NW_021838465.1:92448411-92449411	LOC115269458::NW_021838557.1:72812-73812
737	LOC115269500::NW_021838563.1:241045-242045	LOC115253464::NW_021837267.1:12355925-12356925
738	LOC115269523::NW_021838565.1:7108057-7109057	LOC115268109::NW_021838465.1:30470951-30471951
739	LOC115269554::NW_021838565.1:2298291-2299291	LOC109397697::NW_021838565.1:4233491-4234491
740	LOC115269609::NW_021838572.1:481715-482715	LOC115263766::NW_021837711.1:36177658-36178658
741	LOC115269784::NW_021837045.1:166800823-166801823	LOC115259067::NW_021837046.1:58969266-58970266
742	LOC115269832::NW_021838576.1:32322348-32323348	LOC115260651::NW_021837045.1:62509378-62510378
743	LOC115269849::NW_021838576.1:44863587-44864587	LOC109405120::NW_021838576.1:47261781-47262781
744	LOC115269914::NW_021838576.1:97957841-97958841	LOC115267034::NW_021838410.1:12445244-12446244
745	LOC115260651::NW_021837045.1:62509378-62510378	LOC115269920::NW_021838576.1:104183760-104184760
746	LOC115260092::NW_021839199.1:2120-3120	LOC115269929::NW_021838576.1:114606152-114607152
747	LOC109408471::NW_021838233.1:1951475-1952475	LOC115269975::NW_021837045.1:174180977-174181977
748	LOC115269982::NW_021838576.1:7632705-7633705	LOC115269663::NW_021838576.1:9410979-9411979
749	LOC115269657::NW_021838576.1:7555177-7556177	LOC115269989::NW_021838576.1:9339509-9340509
750	LOC109404546::NW_021838576.1:23266111-23267111	LOC115270053::NW_021838576.1:23244850-23245850
751	LOC115270053::NW_021838576.1:23244850-23245850	LOC109413197::NW_021838576.1:23253067-23254067
752	LOC115270055::NW_021838576.1:23293894-23294894	LOC109621653::NW_021838401.1:954762-955762
753	LOC109413175::NW_021838576.1:23307296-23308296	LOC115270056::NW_021838576.1:23297280-23298280
754	LOC115266976::NW_021838401.1:958149-959149	LOC115270056::NW_021838576.1:23297280-23298280
755	LOC109404547::NW_021838576.1:23303909-23304909	LOC115270057::NW_021838576.1:23312638-23313638
756	LOC115270058::NW_021838576.1:23310809-23311809	LOC109404554::NW_021838576.1:23302080-23303080
757	LOC115270062::NW_021838576.1:23328463-23329463	LOC109400639::NW_021838576.1:23400086-23401086
758	LOC115270061::NW_021838576.1:23326582-23327582	LOC115270062::NW_021838576.1:23328463-23329463
759	LOC115270068::NW_021838576.1:23345970-23346970	LOC109404593::NW_021838576.1:23408657-23409657
760	LOC109404534::NW_021838576.1:23336564-23337564	LOC115270069::NW_021838576.1:23345317-23346317
761	LOC115270070::NW_021838576.1:23348240-23349240	LOC115270066::NW_021838576.1:23339486-23340486
762	LOC115270064::NW_021838576.1:23334734-23335734	LOC115270071::NW_021838576.1:23352258-23353258
763	LOC115270076::NW_021838576.1:23382352-23383352	LOC109400638::NW_021838576.1:23399434-23400434
764	LOC115270064::NW_021838576.1:23334734-23335734	LOC115270079::NW_021838576.1:23361031-23362031
765	LOC115270067::NW_021838576.1:23343487-23344487	LOC115270079::NW_021838576.1:23361031-23362031
766	LOC115270071::NW_021838576.1:23352258-23353258	LOC115270079::NW_021838576.1:23361031-23362031
767	LOC109404523::NW_021838576.1:23393780-23394780	LOC115270082::NW_021838576.1:23402357-23403357
768	LOC109404569::NW_021838576.1:23385203-23386203	LOC115270082::NW_021838576.1:23402357-23403357
769	LOC115270059::NW_021838576.1:23320587-23321587	LOC115270082::NW_021838576.1:23402357-23403357
770	LOC115270063::NW_021838576.1:23330734-23331734	LOC115270082::NW_021838576.1:23402357-23403357
771	LOC115270066::NW_021838576.1:23339486-23340486	LOC115270082::NW_021838576.1:23402357-23403357
772	LOC115270083::NW_021838576.1:23410918-23411918	LOC115270082::NW_021838576.1:23402357-23403357
773	LOC115270084::NW_021838576.1:23408005-23409005	LOC109621653::NW_021838401.1:954762-955762
774	LOC115270060::NW_021838576.1:23325931-23326931	LOC115270084::NW_021838576.1:23408005-23409005
775	LOC115270086::NW_021838576.1:23406175-23407175	LOC115270079::NW_021838576.1:23361031-23362031
776	LOC109404524::NW_021838576.1:23389023-23390023	LOC115270087::NW_021838576.1:23397600-23398600
777	LOC109400614::NW_021838576.1:29454856-29455856	LOC115270114::NW_021838576.1:30584882-30585882
778	LOC109400621::NW_021838576.1:29523568-29524568	LOC115270115::NW_021838576.1:30646921-30647921
779	LOC109413495::NW_021838671.1:147219-148219	LOC115270119::NW_021838576.1:32804823-32805823
780	LOC115270130::NW_021838576.1:36166763-36167763	LOC109426947::NW_021838576.1:36212708-36213708
781	LOC115258365::NW_021838980.1:46482-47482	LOC115270149::NW_021838576.1:41505574-41506574
782	LOC115257143::NW_021838851.1:254423-255423	LOC115270152::NW_021838576.1:42162798-42163798
783	LOC109408065::NW_021838576.1:46756789-46757789	LOC115270160::NW_021838576.1:46871197-46872197
784	LOC115270164::NW_021838576.1:49049437-49050437	LOC109407350::NW_021838576.1:88168715-88169715
785	LOC115268020::NW_021837045.1:138782178-138783178	LOC115270164::NW_021838576.1:49049437-49050437
786	LOC109405136::NW_021838576.1:46027573-46028573	LOC115270165::NW_021838576.1:49069457-49070457
787	LOC109423849::NW_021838576.1:56233406-56234406	LOC115270211::NW_021838576.1:56430149-56431149
788	LOC109430681::NW_021838576.1:56828010-56829010	LOC115270241::NW_021838576.1:60978500-60979500
789	LOC109401945::NW_021837711.1:9553807-9554807	LOC115270278::NW_021838576.1:69309501-69310501
790	LOC115270278::NW_021838576.1:69309501-69310501	LOC109414846::NW_021838576.1:69351161-69352161
791	LOC115270297::NW_021838576.1:72589124-72590124	LOC109423782::NW_021837061.1:61367-62367
792	LOC109423782::NW_021837061.1:61367-62367	LOC115270298::NW_021838576.1:72396136-72397136
793	LOC115270342::NW_021838576.1:86973577-86974577	LOC109404271::NW_021838576.1:92900654-92901654
794	LOC109403128::NW_021838576.1:86377317-86378317	LOC115270345::NW_021838576.1:86542443-86543443
795	LOC115270351::NW_021838576.1:88353715-88354715	LOC109408677::NW_021838576.1:96661168-96662168
796	LOC109404373::NW_021838076.1:968989-969989	LOC115270368::NW_021838576.1:91928237-91929237
797	LOC109420812::NW_021838910.1:2499311-2500311	LOC115270400::NW_021838576.1:100765599-100766599
798	LOC109401015::NW_021838484.1:280806-281806	LOC115270414::NW_021838576.1:106889653-106890653
799	LOC115270430::NW_021838576.1:110617538-110618538	LOC109428684::NW_021838576.1:110624509-110625509
800	LOC109408644::NW_021838576.1:98544022-98545022	LOC115270438::NW_021838576.1:113998056-113999056
801	LOC115270908::NW_021838577.1:1557036-1558036	LOC115256799::NW_021838798.1:82712268-82713268
802	LOC109409472::NW_021838588.1:4685107-4686107	LOC115271021::NW_021838588.1:6738815-6739815
803	LOC115271055::NW_021838597.1:384328-385328	LOC109410299::NW_021838567.1:392776-393776
804	LOC115271068::NW_021838599.1:3631629-3632629	LOC109422671::NW_021838154.1:24380186-24381186
805	LOC109422526::NW_021838142.1:360961-361961	LOC115271097::NW_021838599.1:6060246-6061246
806	LOC115271118::NW_021838602.1:176438-177438	LOC109416703::NW_021838510.1:2202213-2203213

## Sheet: Twins_regions_3_500bp
	Pos_1_gene_1	Pos_2_gene1
1	LOC109397473::NW_021838687.1:57118900-57119400	LOC109397475::NW_021838687.1:57126317-57126817
2	LOC109397482::NW_021838687.1:57114018-57114518	LOC109397494::NW_021838687.1:60350854-60351354
3	LOC109397487::NW_021838687.1:57128842-57129342	LOC109397494::NW_021838687.1:60350854-60351354
4	LOC109397503::NW_021838687.1:60344395-60344895	LOC109397481::NW_021838687.1:60351508-60352008
5	LOC109397482::NW_021838687.1:57114018-57114518	LOC109397504::NW_021838687.1:60343741-60344241
6	LOC109397487::NW_021838687.1:57128842-57129342	LOC109397504::NW_021838687.1:60343741-60344241
7	LOC109397504::NW_021838687.1:60343741-60344241	LOC109397494::NW_021838687.1:60350854-60351354
8	LOC109398559::NW_021837822.1:12173436-12173936	LOC109398360::NW_021837822.1:12915521-12916021
9	LOC109397037::NW_021838153.1:156537522-156538022	LOC109398598::NW_021838532.1:67798-68298
10	LOC109398729::NW_021839020.1:29913262-29913762	LOC109398673::NW_021839020.1:31388516-31389016
11	LOC109399267::NW_021838466.1:7586112-7586612	LOC109398598::NW_021838532.1:67798-68298
12	LOC109399330::NW_021837045.1:152957324-152957824	LOC109399335::NW_021837045.1:152957324-152957824
13	LOC109399533::NW_021838454.1:481038-481538	LOC109398113::NW_021838454.1:2886210-2886710
14	LOC109400226::NW_021837600.1:2192252-2192752	LOC109400233::NW_021838153.1:28043-28543
15	LOC109400382::NW_021838798.1:3473222-3473722	LOC109398400::NW_021838798.1:3711905-3712405
16	LOC109400467::NW_021838646.1:171829-172329	LOC109399676::NW_021838712.1:166073-166573
17	LOC109400689::NW_021838576.1:20245224-20245724	LOC109399383::NW_021838576.1:20832349-20832849
18	LOC109400736::NW_021839130.1:15085131-15085631	LOC109397127::NW_021839130.1:15650580-15651080
19	LOC109399591::NW_021838465.1:44683272-44683772	LOC109400785::NW_021838465.1:45181834-45182334
20	LOC109400976::NW_021838465.1:50958310-50958810	LOC109399660::NW_021838646.1:358538-359038
21	LOC109399720::NW_021837711.1:45007392-45007892	LOC109402022::NW_021837711.1:45230712-45231212
22	LOC109403393::NW_021838909.1:77801310-77801810	LOC109403394::NW_021838909.1:81949612-81950112
23	LOC109398931::NW_021837267.1:6846882-6847382	LOC109403725::NW_021837267.1:6988981-6989481
24	LOC109403738::NW_021837267.1:7188417-7188917	LOC109398941::NW_021838765.1:4531442-4531942
25	LOC109404088::NW_021837822.1:35526016-35526516	LOC109403941::NW_021837822.1:35726138-35726638
26	LOC109404276::NW_021838576.1:86679201-86679701	LOC109403127::NW_021838576.1:92793713-92794213
27	LOC109404302::NW_021838076.1:911404-911904	LOC109403098::NW_021838576.1:91880132-91880632
28	LOC109404306::NW_021838076.1:822674-823174	LOC109403110::NW_021838576.1:91779478-91779978
29	LOC109403100::NW_021838076.1:676015-676515	LOC109404307::NW_021838576.1:91613958-91614458
30	LOC109403124::NW_021838576.1:86273427-86273927	LOC109404336::NW_021838576.1:92584976-92585476
31	LOC109404520::NW_021838576.1:23392231-23392731	LOC109400638::NW_021838576.1:23400808-23401308
32	LOC109404521::NW_021838576.1:23392883-23393383	LOC109400639::NW_021838576.1:23401460-23401960
33	LOC109404534::NW_021838576.1:23337938-23338438	LOC109400638::NW_021838576.1:23400808-23401308
34	LOC109404558::NW_021838576.1:23251216-23251716	LOC109404553::NW_021838576.1:23272543-23273043
35	LOC109404569::NW_021838576.1:23386883-23387383	LOC109404523::NW_021838576.1:23395460-23395960
36	LOC109404593::NW_021838576.1:23410031-23410531	LOC109400639::NW_021838576.1:23401460-23401960
37	LOC109404650::NW_021837046.1:17784881-17785381	LOC109401431::NW_021837046.1:19212784-19213284
38	LOC109400357::NW_021838233.1:14319814-14320314	LOC109404969::NW_021838909.1:22880298-22880798
39	LOC109405034::NW_021837045.1:160237062-160237562	LOC109405037::NW_021837045.1:162354683-162355183
40	LOC109399598::NW_021837931.1:1636664-1637164	LOC109405327::NW_021837931.1:3659042-3659542
41	LOC109405344::NW_021838688.1:1659516-1660016	LOC109397804::NW_021838688.1:856656-857156
42	LOC109397817::NW_021838688.1:1865945-1866445	LOC109405354::NW_021838688.1:1053751-1054251
43	LOC109405370::NW_021838688.1:436625-437125	LOC109397829::NW_021838798.1:90188891-90189391
44	LOC109405455::NW_021837111.1:1153-1653	LOC109402413::NW_021837168.1:700307-700807
45	LOC109405473::NW_021837168.1:725137-725637	LOC109402437::NW_021837168.1:1304048-1304548
46	LOC109403775::NW_021837600.1:49225966-49226466	LOC109405971::NW_021838506.1:217680-218180
47	LOC109406116::NW_021837267.1:3951145-3951645	LOC109401743::NW_021837267.1:4654996-4655496
48	LOC109406122::NW_021837267.1:4278513-4279013	LOC109401744::NW_021837267.1:5065616-5066116
49	LOC109406132::NW_021837267.1:4444170-4444670	LOC109401764::NW_021837267.1:5190227-5190727
50	LOC109406300::NW_021837267.1:45308597-45309097	LOC109404468::NW_021837267.1:46366312-46366812
51	LOC109406348::NW_021838976.1:149770-150270	LOC109397614::NW_021839166.1:109668-110168
52	LOC109405301::NW_021838976.1:2371622-2372122	LOC109406359::NW_021838976.1:2660083-2660583
53	LOC109405312::NW_021838976.1:2273142-2273642	LOC109406383::NW_021838976.1:2581504-2582004
54	LOC109406517::NW_021837267.1:12186681-12187181	LOC109403312::NW_021838563.1:28019-28519
55	LOC109402619::NW_021838798.1:48357001-48357501	LOC109406596::NW_021838798.1:49903128-49903628
56	LOC109402647::NW_021838798.1:48305043-48305543	LOC109406600::NW_021838798.1:49862544-49863044
57	LOC109406857::NW_021837778.1:18429-18929	LOC109398692::NW_021839020.1:40883078-40883578
58	LOC109404443::NW_021837267.1:48470774-48471274	LOC109406888::NW_021838501.1:309939-310439
59	LOC109406987::NW_021838638.1:98517-99017	LOC109397888::NW_021838798.1:53861201-53861701
60	LOC109407066::NW_021837045.1:176293373-176293873	LOC109398985::NW_021838798.1:79129874-79130374
61	LOC109397477::NW_021838687.1:59376988-59377488	LOC109407175::NW_021838687.1:59391003-59391503
62	LOC109397491::NW_021838687.1:60341247-60341747	LOC109407180::NW_021838687.1:60348363-60348863
63	LOC109408016::NW_021838576.1:46077351-46077851	LOC109405149::NW_021838576.1:49136743-49137243
64	LOC109405145::NW_021838576.1:45391946-45392446	LOC109408030::NW_021838576.1:48367967-48368467
65	LOC109408410::NW_021837045.1:183401025-183401525	LOC109401042::NW_021837045.1:183952931-183953431
66	LOC109403044::NW_021838576.1:88678767-88679267	LOC109408667::NW_021838576.1:96931381-96931881
67	LOC109403058::NW_021838576.1:88615582-88616082	LOC109408669::NW_021838576.1:96882163-96882663
68	LOC109403082::NW_021838576.1:88591380-88591880	LOC109408671::NW_021838576.1:96864555-96865055
69	LOC109408676::NW_021838576.1:88478628-88479128	LOC109403048::NW_021838576.1:96764996-96765496
70	LOC109403069::NW_021838576.1:88211073-88211573	LOC109408684::NW_021838576.1:96453195-96453695
71	LOC109408775::NW_021838465.1:4325067-4325567	LOC109408774::NW_021838465.1:5424959-5425459
72	LOC109408802::NW_021838391.1:587504-588004	LOC109408804::NW_021838465.1:9056933-9057433
73	LOC109408897::NW_021838343.1:7721318-7721818	LOC109408236::NW_021839152.1:112310-112810
74	LOC109409854::NW_021838465.1:27344563-27345063	LOC109397116::NW_021838465.1:30005177-30005677
75	LOC109410161::NW_021837329.1:54281-54781	LOC109407831::NW_021838153.1:71403363-71403863
76	LOC109410424::NW_021837045.1:50581012-50581512	LOC109401462::NW_021837045.1:51275746-51276246
77	LOC109410440::NW_021837045.1:54801966-54802466	LOC109401457::NW_021838795.1:270510-271010
78	LOC109410465::NW_021837045.1:50450544-50451044	LOC109401485::NW_021837045.1:51179403-51179903
79	LOC109411083::NW_021837045.1:118830081-118830581	LOC109410903::NW_021837045.1:119254721-119255221
80	LOC109411089::NW_021838343.1:1871209-1871709	LOC109410268::NW_021838343.1:3705329-3705829
81	LOC109411109::NW_021837045.1:118785867-118786367	LOC109410905::NW_021837045.1:119205624-119206124
82	LOC109411128::NW_021838343.1:8927647-8928147	LOC109408195::NW_021839191.1:13049-13549
83	LOC109407912::NW_021838466.1:2930492-2930992	LOC109411405::NW_021838466.1:9800125-9800625
84	LOC109401827::NW_021838699.1:1049172-1049672	LOC109412092::NW_021838699.1:1099129-1099629
85	LOC109405810::NW_021837045.1:61511055-61511555	LOC109412341::NW_021838343.1:2945219-2945719
86	LOC109412539::NW_021838385.1:777793-778293	LOC109412590::NW_021838576.1:102759038-102759538
87	LOC109412620::NW_021837931.1:24377573-24378073	LOC109401558::NW_021837931.1:24644601-24645101
88	LOC109409534::NW_021838798.1:5076009-5076509	LOC109412988::NW_021838798.1:6326415-6326915
89	LOC109409468::NW_021838588.1:6191303-6191803	LOC109412989::NW_021838588.1:6633886-6634386
90	LOC109409507::NW_021838576.1:120167062-120167562	LOC109413017::NW_021838588.1:6273707-6274207
91	LOC109413111::NW_021838909.1:16756419-16756919	LOC109413112::NW_021838909.1:17710889-17711389
92	LOC109413165::NW_021837600.1:46946949-46947449	LOC109408146::NW_021839153.1:1227258-1227758
93	LOC109413177::NW_021838576.1:23261905-23262405	LOC109404563::NW_021838576.1:23270715-23271215
94	LOC109413189::NW_021838576.1:23263733-23264233	LOC109404553::NW_021838576.1:23272543-23273043
95	LOC109413199::NW_021838576.1:23248727-23249227	LOC109404564::NW_021838576.1:23270063-23270563
96	LOC109413239::NW_021838417.1:65412-65912	LOC109402166::NW_021838417.1:170798-171298
97	LOC109404546::NW_021838576.1:23267791-23268291	LOC109413299::NW_021838576.1:23276396-23276896
98	LOC109413197::NW_021838576.1:23254747-23255247	LOC109413299::NW_021838576.1:23276396-23276896
99	LOC109413309::NW_021838576.1:23355464-23355964	LOC109400638::NW_021838576.1:23400808-23401308
100	LOC109413378::NW_021837822.1:35589602-35590102	LOC109413358::NW_021837822.1:35682668-35683168
101	LOC109413414::NW_021837822.1:35625499-35625999	LOC109403941::NW_021837822.1:35726138-35726638
102	LOC109404947::NW_021838576.1:30064333-30064833	LOC109413507::NW_021838576.1:31209399-31209899
103	LOC109413554::NW_021837489.1:41439036-41439536	LOC109407903::NW_021837489.1:43947629-43948129
104	LOC109413581::NW_021837489.1:37706109-37706609	LOC109401225::NW_021837489.1:40859578-40860078
105	LOC109413608::NW_021837489.1:36720770-36721270	LOC109401236::NW_021837489.1:39907826-39908326
106	LOC109407929::NW_021838466.1:2120008-2120508	LOC109413857::NW_021838466.1:2592496-2592996
107	LOC109413859::NW_021838466.1:2133745-2134245	LOC109408070::NW_021838466.1:2609106-2609606
108	LOC109407934::NW_021838466.1:1903964-1904464	LOC109413869::NW_021839186.1:2107665-2108165
109	LOC109413878::NW_021838466.1:2004305-2004805	LOC109408071::NW_021839186.1:2197375-2197875
110	LOC109413987::NW_021837623.1:1239555-1240055	LOC109399190::NW_021838153.1:96828403-96828903
111	LOC109404233::NW_021838042.1:17304676-17305176	LOC109414032::NW_021838383.1:450933-451433
112	LOC109414034::NW_021838042.1:13471895-13472395	LOC109404241::NW_021838042.1:17326522-17327022
113	LOC109407247::NW_021839020.1:50580835-50581335	LOC109414315::NW_021839020.1:52194083-52194583
114	LOC109414404::NW_021838465.1:61295761-61296261	LOC109410590::NW_021838465.1:61872507-61873007
115	LOC109414708::NW_021838699.1:4036998-4037498	LOC109401879::NW_021838699.1:4844187-4844687
116	LOC109403605::NW_021838432.1:2844010-2844510	LOC109414760::NW_021838432.1:5472885-5473385
117	LOC109401945::NW_021837711.1:9560905-9561405	LOC109414846::NW_021838576.1:69359942-69360442
118	LOC109403285::NW_021837267.1:17326420-17326920	LOC109415064::NW_021837267.1:17714918-17715418
119	LOC109415098::NW_021837323.1:1085935-1086435	LOC109403000::NW_021837323.1:1225981-1226481
120	LOC109400859::NW_021837045.1:129080785-129081285	LOC109415500::NW_021837045.1:130068192-130068692
121	LOC109400807::NW_021837045.1:130448495-130448995	LOC109415509::NW_021837045.1:130752439-130752939
122	LOC109401332::NW_021837045.1:100928713-100929213	LOC109415782::NW_021837045.1:101770300-101770800
123	LOC109415796::NW_021838909.1:37168677-37169177	LOC109398678::NW_021839130.1:46917218-46917718
124	LOC109415911::NW_021837931.1:25505126-25505626	LOC109412644::NW_021837931.1:25685160-25685660
125	LOC109415912::NW_021837156.1:35851776-35852276	LOC109412955::NW_021837156.1:41990398-41990898
126	LOC109415922::NW_021837822.1:19817570-19818070	LOC109411503::NW_021837822.1:20275691-20276191
127	LOC109415927::NW_021837822.1:19887578-19888078	LOC109411505::NW_021837822.1:20350172-20350672
128	LOC109416077::NW_021837822.1:23859934-23860434	LOC109402947::NW_021837822.1:24480860-24481360
129	LOC109416112::NW_021837822.1:23735907-23736407	LOC109402910::NW_021837822.1:24339741-24340241
130	LOC109404996::NW_021837267.1:54520368-54520868	LOC109416158::NW_021837379.1:1024091-1024591
131	LOC109404975::NW_021837267.1:54235069-54235569	LOC109416160::NW_021837379.1:1027030-1027530
132	LOC109416185::NW_021837267.1:51251630-51252130	LOC109404461::NW_021837333.1:1826-2326
133	LOC109412353::NW_021837046.1:27514292-27514792	LOC109416188::NW_021837046.1:31073937-31074437
134	LOC109412350::NW_021837046.1:28240814-28241314	LOC109416190::NW_021837046.1:31155073-31155573
135	LOC109416591::NW_021837046.1:26194054-26194554	LOC109412354::NW_021837046.1:30483229-30483729
136	LOC109416680::NW_021838343.1:14623117-14623617	LOC109416493::NW_021838343.1:14739741-14740241
137	LOC109415608::NW_021839130.1:39194016-39194516	LOC109416911::NW_021839130.1:40011631-40012131
138	LOC109416931::NW_021837600.1:49107721-49108221	LOC109403770::NW_021838506.1:111445-111945
139	LOC109417539::NW_021838384.1:403476-403976	LOC109410223::NW_021838390.1:390409-390909
140	LOC109410231::NW_021838384.1:582830-583330	LOC109417548::NW_021838390.1:572654-573154
141	LOC109417710::NW_021838687.1:76290322-76290822	LOC109417761::NW_021838687.1:78014772-78015272
142	LOC109418218::NW_021838488.1:437204-437704	LOC109418216::NW_021838488.1:3885856-3886356
143	LOC109418287::NW_021837600.1:8537061-8537561	LOC109412464::NW_021838419.1:745440-745940
144	LOC109413079::NW_021838909.1:11878958-11879458	LOC109418506::NW_021838909.1:13132208-13132708
145	LOC109418536::NW_021838909.1:16465967-16466467	LOC109413096::NW_021838909.1:17447665-17448165
146	LOC109418548::NW_021838909.1:17736524-17737024	LOC109413113::NW_021839046.1:16076-16576
147	LOC109418775::NW_021838909.1:38183175-38183675	LOC109415835::NW_021839108.1:222876-223376
148	LOC109417077::NW_021838909.1:40111818-40112318	LOC109418811::NW_021838909.1:40245140-40245640
149	LOC109418952::NW_021837541.1:10569-11069	LOC109399650::NW_021838465.1:54219366-54219866
150	LOC109419038::NW_021837523.1:754442-754942	LOC109419054::NW_021839020.1:5623792-5624292
151	LOC109419096::NW_021837523.1:441826-442326	LOC109409328::NW_021839020.1:5360277-5360777
152	LOC109419117::NW_021839020.1:2603571-2604071	LOC109409311::NW_021839020.1:6688378-6688878
153	LOC109407487::NW_021837045.1:29411921-29412421	LOC109419226::NW_021837331.1:30156-30656
154	LOC109419238::NW_021837045.1:30275069-30275569	LOC109407476::NW_021837045.1:30519894-30520394
155	LOC109408461::NW_021837045.1:174703616-174704116	LOC109419338::NW_021837045.1:175136240-175136740
156	LOC109409296::NW_021839020.1:4348198-4348698	LOC109419529::NW_021839020.1:8455669-8456169
157	LOC109419551::NW_021839020.1:4643556-4644056	LOC109409378::NW_021839020.1:8779170-8779670
158	LOC109409286::NW_021839020.1:4891732-4892232	LOC109419566::NW_021839020.1:9052223-9052723
159	LOC109419636::NW_021837909.1:1215559-1216059	LOC109408505::NW_021838637.1:223170-223670
160	LOC109410012::NW_021838153.1:50631854-50632354	LOC109419661::NW_021838153.1:52411318-52411818
161	LOC109398225::NW_021838687.1:16819397-16819897	LOC109419776::NW_021838687.1:18506732-18507232
162	LOC109420208::NW_021838687.1:23496773-23497273	LOC109419765::NW_021838687.1:25260802-25261302
163	LOC109401669::NW_021838909.1:47233704-47234204	LOC109420297::NW_021838909.1:51244937-51245437
164	LOC109401673::NW_021838909.1:50496451-50496951	LOC109420344::NW_021838909.1:52466636-52467136
165	LOC109420362::NW_021838909.1:53955882-53956382	LOC109401661::NW_021838909.1:54971228-54971728
166	LOC109420419::NW_021838909.1:65542574-65543074	LOC109402331::NW_021838909.1:68323515-68324015
167	LOC109420424::NW_021838444.1:319041-319541	LOC109402341::NW_021838909.1:65384529-65385029
168	LOC109420464::NW_021837378.1:32216914-32217414	LOC109420463::NW_021837378.1:32221149-32221649
169	LOC109420465::NW_021837378.1:32212677-32213177	LOC109420463::NW_021837378.1:32221149-32221649
170	LOC109420465::NW_021837378.1:32212677-32213177	LOC109420464::NW_021837378.1:32216914-32217414
171	LOC109420466::NW_021837378.1:32208442-32208942	LOC109420463::NW_021837378.1:32221149-32221649
172	LOC109420466::NW_021837378.1:32208442-32208942	LOC109420464::NW_021837378.1:32216914-32217414
173	LOC109420474::NW_021837378.1:54885886-54886386	LOC109420483::NW_021837378.1:54890043-54890543
174	LOC109420474::NW_021837378.1:54885886-54886386	LOC109420486::NW_021837378.1:54894203-54894703
175	LOC109420483::NW_021837378.1:54890043-54890543	LOC109420486::NW_021837378.1:54894203-54894703
176	LOC109420489::NW_021838687.1:27524784-27525284	LOC109407535::NW_021838687.1:28180393-28180893
177	LOC109420492::NW_021838687.1:26023278-26023778	LOC109419733::NW_021838687.1:26931222-26931722
178	LOC109414117::NW_021838687.1:44520718-44521218	LOC109420686::NW_021838687.1:47436004-47436504
179	LOC109414276::NW_021838595.1:184452-184952	LOC109420700::NW_021838687.1:44755099-44755599
180	LOC109420738::NW_021838687.1:53206482-53206982	LOC109419942::NW_021838687.1:53842827-53843327
181	LOC109420739::NW_021838687.1:53267329-53267829	LOC109419943::NW_021838687.1:53887808-53888308
182	LOC109420740::NW_021838687.1:53224196-53224696	LOC109419944::NW_021838687.1:53856214-53856714
183	LOC109407199::NW_021837834.1:1157580-1158080	LOC109420749::NW_021838153.1:41856427-41856927
184	LOC109412534::NW_021838385.1:480593-481093	LOC109420836::NW_021838576.1:102434565-102435065
185	LOC109412541::NW_021838385.1:949979-950479	LOC109420845::NW_021838576.1:102862198-102862698
186	LOC109411065::NW_021838576.1:105317163-105317663	LOC109420861::NW_021838576.1:121292886-121293386
187	LOC109420863::NW_021838576.1:106460645-106461145	LOC109401007::NW_021838576.1:122842167-122842667
188	LOC109413895::NW_021837104.1:56790-57290	LOC109421114::NW_021838732.1:2449797-2450297
189	LOC109421121::NW_021838489.1:594441-594941	LOC109408842::NW_021838513.1:572499-572999
190	LOC109421150::NW_021838465.1:56980228-56980728	LOC109410579::NW_021838465.1:58047560-58048060
191	LOC109421161::NW_021838465.1:56936506-56937006	LOC109410561::NW_021838465.1:57992113-57992613
192	LOC109410563::NW_021838465.1:56904463-56904963	LOC109421163::NW_021838465.1:57964908-57965408
193	LOC109410820::NW_021838395.1:900772-901272	LOC109421170::NW_021838787.1:311592-312092
194	LOC109410819::NW_021838395.1:916074-916574	LOC109421242::NW_021838787.1:328597-329097
195	LOC109397041::NW_021838687.1:49633952-49634452	LOC109421473::NW_021839130.1:62103331-62103831
196	LOC109421825::NW_021837156.1:27735140-27735640	LOC109421820::NW_021837156.1:21129891-21130391
197	LOC109421869::NW_021837047.1:277766-278266	LOC109413798::NW_021837156.1:31074238-31074738
198	LOC109421903::NW_021837489.1:1286296-1286796	LOC109408615::NW_021837489.1:3135108-3135608
199	LOC109421946::NW_021837489.1:1397352-1397852	LOC109408611::NW_021837489.1:3265519-3266019
200	LOC109401455::NW_021838643.1:1662168-1662668	LOC109422218::NW_021838643.1:4771266-4771766
201	LOC109422344::NW_021837545.1:242194-242694	LOC109401330::NW_021838043.1:252709-253209
202	LOC109417184::NW_021838200.1:418327-418827	LOC109422424::NW_021838909.1:90186312-90186812
203	LOC109422425::NW_021838909.1:88605472-88605972	LOC109417180::NW_021838909.1:89484151-89484651
204	LOC109422440::NW_021838909.1:89852380-89852880	LOC109417180::NW_021838909.1:89484151-89484651
205	LOC109422444::NW_021838909.1:88271230-88271730	LOC109400000::NW_021838909.1:89560459-89560959
206	LOC109422628::NW_021838142.1:52307-52807	LOC109402823::NW_021838599.1:485112-485612
207	LOC109422686::NW_021838154.1:23217538-23218038	LOC109401131::NW_021838599.1:2400958-2401458
208	LOC109422687::NW_021838154.1:23191423-23191923	LOC109401128::NW_021838599.1:2353681-2354181
209	LOC109422764::NW_021837156.1:20620769-20621269	LOC109421828::NW_021837156.1:21130926-21131426
210	LOC109422769::NW_021837156.1:22228366-22228866	LOC109421845::NW_021837156.1:28590711-28591211
211	LOC109422780::NW_021837156.1:21156502-21157002	LOC109421834::NW_021837156.1:27766536-27767036
212	LOC109422823::NW_021837156.1:18874372-18874872	LOC109400930::NW_021837156.1:25840415-25840915
213	LOC109422847::NW_021837267.1:29991340-29991840	LOC109421473::NW_021839130.1:62103331-62103831
214	LOC109400577::NW_021837489.1:26060702-26061202	LOC109422884::NW_021838450.1:45072-45572
215	LOC109405329::NW_021837156.1:900961-901461	LOC109422992::NW_021837156.1:1208999-1209499
216	LOC109423072::NW_021837445.1:1558-2058	LOC109405778::NW_021838687.1:20194091-20194591
217	LOC109419444::NW_021838533.1:256289-256789	LOC109423120::NW_021838632.1:5892849-5893349
218	LOC109419389::NW_021838533.1:32450-32950	LOC109423122::NW_021838632.1:5681260-5681760
219	LOC109423167::NW_021838781.1:287031-287531	LOC109422203::NW_021838503.1:52258-52758
220	LOC109397289::NW_021838406.1:519135-519635	LOC109423201::NW_021838632.1:1551583-1552083
221	LOC109423223::NW_021837711.1:1963822-1964322	LOC109397270::NW_021837711.1:2803379-2803879
222	LOC109397254::NW_021837711.1:2233673-2234173	LOC109423229::NW_021837711.1:3053420-3053920
223	LOC109423244::NW_021837323.1:1354726-1355226	LOC109408245::NW_021838632.1:142947-143447
224	LOC109423406::NW_021838153.1:122447052-122447552	LOC109418354::NW_021838233.1:7873451-7873951
225	LOC109402464::NW_021837822.1:809345-809845	LOC109423578::NW_021838434.1:94665-95165
226	LOC109400251::NW_021837822.1:5172219-5172719	LOC109423612::NW_021838321.1:417258-417758
227	LOC109398576::NW_021837822.1:9070000-9070500	LOC109423642::NW_021837822.1:9734322-9734822
228	LOC109399803::NW_021838718.1:10989-11489	LOC109423727::NW_021838465.1:56731371-56731871
229	LOC109423727::NW_021838465.1:56731371-56731871	LOC109423728::NW_021838576.1:28433459-28433959
230	LOC109408595::NW_021838576.1:54566786-54567286	LOC109423828::NW_021838576.1:55251703-55252203
231	LOC109423907::NW_021837045.1:101089056-101089556	LOC109415778::NW_021837045.1:101851363-101851863
232	LOC109423910::NW_021838153.1:152002698-152003198	LOC109404787::NW_021838153.1:153831263-153831763
233	LOC109423916::NW_021838153.1:152097812-152098312	LOC109404805::NW_021838153.1:153924652-153925152
234	LOC109424015::NW_021838154.1:4256196-4256696	LOC109416410::NW_021838154.1:6259157-6259657
235	LOC109398776::NW_021838343.1:5527732-5528232	LOC109424308::NW_021838508.1:585854-586354
236	LOC109424310::NW_021838665.1:5504058-5504558	LOC109407870::NW_021837423.1:76178-76678
237	LOC109424433::NW_021838654.1:2361125-2361625	LOC109422335::NW_021838654.1:2993950-2994450
238	LOC109422358::NW_021838403.1:847288-847788	LOC109424456::NW_021839208.1:1573076-1573576
239	LOC109422366::NW_021838403.1:513384-513884	LOC109424462::NW_021839208.1:1248765-1249265
240	LOC109422370::NW_021838403.1:289246-289746	LOC109424463::NW_021839208.1:1036924-1037424
241	LOC109422393::NW_021837045.1:153349384-153349884	LOC109424490::NW_021837311.1:10949-11449
242	LOC109424810::NW_021837822.1:33476607-33477107	LOC109414634::NW_021837976.1:191328-191828
243	LOC109424851::NW_021837822.1:30038952-30039452	LOC109414593::NW_021837822.1:31309655-31310155
244	LOC109425145::NW_021838517.1:611289-611789	LOC109412438::NW_021838576.1:63903413-63903913
245	LOC109400338::NW_021838042.1:5349315-5349815	LOC109425186::NW_021838042.1:5763567-5764067
246	LOC109399828::NW_021838410.1:8740310-8740810	LOC109425278::NW_021838410.1:9112317-9112817
247	LOC109419814::NW_021839130.1:55036643-55037143	LOC109425312::NW_021839130.1:55432338-55432838
248	LOC109425372::NW_021838410.1:6988135-6988635	LOC109399856::NW_021838410.1:7688781-7689281
249	LOC109399839::NW_021838410.1:7172881-7173381	LOC109425375::NW_021838410.1:7871712-7872212
250	LOC109398974::NW_021838998.1:2754965-2755465	LOC109425529::NW_021839130.1:39639810-39640310
251	LOC109425571::NW_021837045.1:113702953-113703453	LOC109411551::NW_021837045.1:114188205-114188705
252	LOC109407585::NW_021838538.1:378588-379088	LOC109425849::NW_021838538.1:529608-530108
253	LOC109418407::NW_021837045.1:12475626-12476126	LOC109426122::NW_021837734.1:126705-127205
254	LOC109418414::NW_021837045.1:13286707-13287207	LOC109426145::NW_021837045.1:15891773-15892273
255	LOC109426146::NW_021837045.1:13330409-13330909	LOC109418415::NW_021837045.1:15923377-15923877
256	LOC109398096::NW_021838856.1:209116-209616	LOC109426171::NW_021838454.1:5904739-5905239
257	LOC109398084::NW_021838454.1:5684402-5684902	LOC109426188::NW_021838454.1:7460512-7461012
258	LOC109410282::NW_021838567.1:189203-189703	LOC109426252::NW_021838597.1:220534-221034
259	LOC109410291::NW_021838567.1:365740-366240	LOC109426262::NW_021838597.1:358436-358936
260	LOC109410292::NW_021838567.1:331347-331847	LOC109426263::NW_021838597.1:330114-330614
261	LOC109426388::NW_021838454.1:1853503-1854003	LOC109398042::NW_021838454.1:3713497-3713997
262	LOC109426403::NW_021838454.1:1780183-1780683	LOC109398022::NW_021838454.1:3618679-3619179
263	LOC109426530::NW_021838465.1:73308516-73309016	LOC109408340::NW_021838465.1:73835737-73836237
264	LOC109399075::NW_021837623.1:1093706-1094206	LOC109426543::NW_021837623.1:1102653-1103153
265	LOC109426659::NW_021838153.1:17389468-17389968	LOC109426658::NW_021838427.1:456346-456846
266	LOC109426683::NW_021838153.1:12020836-12021336	LOC109417780::NW_021838153.1:13293750-13294250
267	LOC109426687::NW_021838153.1:11101666-11102166	LOC109417784::NW_021838153.1:13043431-13043931
268	LOC109417786::NW_021838153.1:10845002-10845502	LOC109426688::NW_021838153.1:12775589-12776089
269	LOC109426711::NW_021838153.1:9331320-9331820	LOC109408803::NW_021838153.1:34207605-34208105
270	LOC109417868::NW_021838153.1:3262524-3263024	LOC109426825::NW_021838153.1:4626572-4627072
271	LOC109426840::NW_021838153.1:930133-930633	LOC109417952::NW_021838153.1:1874247-1874747
272	LOC109413631::NW_021837489.1:30516542-30517042	LOC109426881::NW_021838821.1:139168-139668
273	LOC109426888::NW_021838991.1:76892-77392	LOC109426889::NW_021838643.1:5870206-5870706
274	LOC109411331::NW_021837045.1:66276030-66276530	LOC109427072::NW_021837045.1:66798224-66798724
275	LOC109427121::NW_021837045.1:88267851-88268351	LOC109400194::NW_021837045.1:90201373-90201873
276	LOC109427242::NW_021837267.1:38693981-38694481	LOC109411608::NW_021839070.1:164625-165125
277	LOC109411624::NW_021837123.1:458858-459358	LOC109427260::NW_021837267.1:34862363-34862863
278	LOC109427301::NW_021837045.1:7344978-7345478	LOC109418332::NW_021837045.1:8748714-8749214
279	LOC109427342::NW_021838542.1:585658-586158	LOC109412094::NW_021838603.1:490397-490897
280	LOC109427354::NW_021838542.1:577588-578088	LOC109412097::NW_021838603.1:483033-483533
281	LOC109414739::NW_021838153.1:24429746-24430246	LOC109427362::NW_021838419.1:829248-829748
282	LOC109425923::NW_021838798.1:51690949-51691449	LOC109427623::NW_021838909.1:27291658-27292158
283	LOC109418235::NW_021837390.1:1309329-1309829	LOC109428008::NW_021838707.1:32472-32972
284	LOC109428047::NW_021837045.1:4563810-4564310	LOC109418268::NW_021837045.1:5320827-5321327
285	LOC109411640::NW_021837123.1:1480903-1481403	LOC109428133::NW_021837123.1:1766468-1766968
286	LOC109427929::NW_021838233.1:13352296-13352796	LOC109428250::NW_021838233.1:17156438-17156938
287	LOC109428484::NW_021838798.1:63511262-63511762	LOC109412976::NW_021838798.1:64323710-64324210
288	LOC109428600::NW_021838798.1:59939375-59939875	LOC109416950::NW_021838898.1:2896924-2897424
289	LOC109416959::NW_021837136.1:29819-30319	LOC109428600::NW_021838798.1:59939375-59939875
290	LOC109428605::NW_021837045.1:87416681-87417181	LOC109397588::NW_021838576.1:59325455-59325955
291	LOC109422496::NW_021837290.1:1578823-1579323	LOC109428631::NW_021838576.1:108283596-108284096
292	LOC109428661::NW_021838576.1:85593678-85594178	LOC109422469::NW_021838576.1:109503941-109504441
293	LOC109424276::NW_021837634.1:366946-367446	LOC109428705::NW_021838576.1:81990446-81990946
294	LOC109424533::NW_021838554.1:4918092-4918592	LOC109428758::NW_021838719.1:89971-90471
295	LOC109397781::NW_021837223.1:29748-30248	LOC109428784::NW_021838554.1:2915324-2915824
296	LOC109428787::NW_021837223.1:61896-62396	LOC109405081::NW_021838554.1:2934716-2935216
297	LOC109428946::NW_021838465.1:7255275-7255775	LOC109408734::NW_021838465.1:11148624-11149124
298	LOC109408740::NW_021838465.1:6867518-6868018	LOC109428952::NW_021838465.1:10791947-10792447
299	LOC109408744::NW_021838465.1:6825622-6826122	LOC109428955::NW_021838465.1:10710799-10711299
300	LOC109429132::NW_021837267.1:32813369-32813869	LOC109409019::NW_021837267.1:33586864-33587364
301	LOC109398801::NW_021837267.1:24751612-24752112	LOC109429182::NW_021837267.1:28343199-28343699
302	LOC109398849::NW_021837267.1:24101506-24102006	LOC109429201::NW_021838544.1:576461-576961
303	LOC109398783::NW_021837267.1:19686737-19687237	LOC109429211::NW_021837267.1:23427146-23427646
304	LOC109400865::NW_021837711.1:2512828-2513328	LOC109429309::NW_021839130.1:24919294-24919794
305	LOC109409623::NW_021838399.1:6636804-6637304	LOC109429367::NW_021838399.1:9529097-9529597
306	LOC109409635::NW_021838399.1:11557773-11558273	LOC109429378::NW_021838399.1:12417631-12418131
307	LOC109425117::NW_021838399.1:11835632-11836132	LOC109429380::NW_021838399.1:12753741-12754241
308	LOC109429382::NW_021838399.1:11842823-11843323	LOC109425118::NW_021838399.1:12762636-12763136
309	LOC109429459::NW_021838687.1:36379297-36379797	LOC109420651::NW_021838687.1:42266797-42267297
310	LOC109429485::NW_021837045.1:40070986-40071486	LOC109415726::NW_021838786.1:12039-12539
311	LOC109406840::NW_021837045.1:39132766-39133266	LOC109429498::NW_021837045.1:43778502-43779002
312	LOC109429586::NW_021837378.1:8420327-8420827	LOC109408551::NW_021838031.1:36226-36726
313	LOC109406510::NW_021837378.1:2016503-2017003	LOC109429657::NW_021837378.1:14425775-14426275
314	LOC109408549::NW_021837378.1:8490579-8491079	LOC109429717::NW_021838031.1:111704-112204
315	LOC109429745::NW_021837378.1:11105234-11105734	LOC109397937::NW_021838289.1:196115-196615
316	LOC109429844::NW_021837378.1:30031668-30032168	LOC109398308::NW_021838387.1:324779-325279
317	LOC109416368::NW_021838432.1:6453506-6454006	LOC109430001::NW_021838432.1:7538394-7538894
318	LOC109414744::NW_021838432.1:8701280-8701780	LOC109430018::NW_021838432.1:10251080-10251580
319	LOC109416351::NW_021838432.1:8222201-8222701	LOC109430024::NW_021838432.1:11191295-11191795
320	LOC109416369::NW_021838432.1:6437062-6437562	LOC109430044::NW_021838432.1:7508022-7508522
321	LOC109430219::NW_021838909.1:2467668-2468168	LOC109410077::NW_021838909.1:3856558-3857058
322	LOC109430451::NW_021837045.1:142435311-142435811	LOC109409570::NW_021837045.1:142652408-142652908
323	LOC109409590::NW_021837045.1:145547232-145547732	LOC109430464::NW_021837045.1:146599855-146600355
324	LOC109430468::NW_021837045.1:143517296-143517796	LOC109409582::NW_021837045.1:144954153-144954653
325	LOC109430515::NW_021838405.1:875236-875736	LOC109428430::NW_021838798.1:68492031-68492531
326	LOC109430611::NW_021838576.1:68271822-68272322	LOC109423808::NW_021838576.1:69185992-69186492
327	LOC109430692::NW_021838909.1:8228208-8228708	LOC109430644::NW_021838925.1:63668-64168
328	LOC109430697::NW_021837489.1:14208978-14209478	LOC109405778::NW_021838687.1:20194091-20194591
329	LOC109423072::NW_021837445.1:1558-2058	LOC109430697::NW_021837489.1:14208978-14209478
330	LOC109429975::NW_021838909.1:6729005-6729505	LOC109430704::NW_021838909.1:10328444-10328944
331	LOC109429778::NW_021838153.1:110798950-110799450	LOC109430728::NW_021838909.1:8375166-8375666
332	LOC109424178::NW_021837600.1:19826202-19826702	LOC109430803::NW_021837600.1:20173585-20174085
333	LOC109424174::NW_021837600.1:20304639-20305139	LOC109430812::NW_021837600.1:23117555-23118055
334	LOC109424156::NW_021837600.1:15916083-15916583	LOC109430835::NW_021837600.1:16494021-16494521
335	LOC109430836::NW_021837600.1:16063236-16063736	LOC109424150::NW_021837600.1:16641995-16642495
336	LOC109430840::NW_021838854.1:3364618-3365118	LOC109402721::NW_021839130.1:43678040-43678540
337	LOC109430882::NW_021838542.1:552871-553371	LOC109427356::NW_021838603.1:449224-449724
338	LOC109412105::NW_021838542.1:481188-481688	LOC109430926::NW_021838603.1:362919-363419
339	LOC109430936::NW_021838542.1:419379-419879	LOC109412106::NW_021838603.1:300775-301275
340	LOC109412111::NW_021838542.1:384102-384602	LOC109430943::NW_021838603.1:276669-277169
341	LOC109412112::NW_021838542.1:355088-355588	LOC109430953::NW_021838603.1:245044-245544
342	LOC109431002::NW_021838042.1:13767424-13767924	LOC109404231::NW_021838042.1:17640225-17640725
343	LOC109412120::NW_021838542.1:205980-206480	LOC109431022::NW_021838603.1:50847-51347
344	LOC109415837::NW_021838798.1:80574487-80574987	LOC109431177::NW_021838798.1:92689520-92690020
345	LOC109420122::NW_021837931.1:18665926-18666426	LOC109431192::NW_021837931.1:18677075-18677575
346	LOC109431228::NW_021837931.1:18202912-18203412	LOC109431225::NW_021837931.1:18246788-18247288
347	LOC109431254::NW_021837931.1:13733771-13734271	LOC109407701::NW_021838847.1:101642-102142
348	LOC109427757::NW_021837156.1:49677537-49678037	LOC109431346::NW_021837156.1:51290319-51290819
349	LOC109431537::NW_021838909.1:90292353-90292853	LOC109422419::NW_021838909.1:90666420-90666920
350	LOC109398026::NW_021838454.1:6967658-6968158	LOC109431685::NW_021838454.1:9164677-9165177
351	LOC109430942::NW_021838443.1:5838874-5839374	LOC109431686::NW_021839086.1:1430902-1431402
352	LOC109431693::NW_021838443.1:424911-425411	LOC109398056::NW_021838443.1:9685583-9686083
353	LOC109398072::NW_021838454.1:7060675-7061175	LOC109431710::NW_021838454.1:9294102-9294602
354	LOC109402951::NW_021837045.1:46291370-46291870	LOC109431763::NW_021837045.1:45838135-45838635
355	LOC109416203::NW_021838687.1:7947456-7947956	LOC109431805::NW_021838687.1:8342391-8342891
356	LOC109409735::NW_021838153.1:61168045-61168545	LOC109431917::NW_021838153.1:62372661-62373161
357	LOC109407712::NW_021837931.1:13222742-13223242	LOC109431971::NW_021837931.1:15047723-15048223
358	LOC109431292::NW_021837931.1:12551209-12551709	LOC109431990::NW_021838763.1:64432-64932
359	LOC109403972::NW_021837822.1:36043123-36043623	LOC109432032::NW_021837822.1:38800606-38801106
360	LOC109409753::NW_021838153.1:61539575-61540075	LOC109432077::NW_021838153.1:62751487-62751987
361	LOC109427086::NW_021837489.1:1796350-1796850	LOC109432083::NW_021838909.1:49577520-49578020
362	LOC109430369::NW_021838884.1:50594-51094	LOC109432116::NW_021838909.1:4818308-4818808
363	LOC109404935::NW_021837156.1:58900723-58901223	LOC109432117::NW_021838798.1:72387248-72387748
364	LOC109423475::NW_021837711.1:11046083-11046583	LOC109432146::NW_021837711.1:20018393-20018893
365	LOC109423060::NW_021838676.1:3252960-3253460	LOC109432358::NW_021837156.1:45714300-45714800
366	LOC109423064::NW_021838676.1:3119957-3120457	LOC109432360::NW_021837156.1:45193043-45193543
367	LOC109432368::NW_021837156.1:45865274-45865774	LOC109423056::NW_021838676.1:3383349-3383849
368	LOC109432529::NW_021838153.1:118068105-118068605	LOC109421433::NW_021838153.1:125076555-125077055
369	LOC109432535::NW_021838153.1:117793679-117794179	LOC109421448::NW_021838153.1:124806533-124807033
370	LOC109421440::NW_021838153.1:117970336-117970836	LOC109432537::NW_021838153.1:124978541-124979041
371	LOC109432543::NW_021838153.1:119151936-119152436	LOC109421420::NW_021838153.1:126145762-126146262
372	LOC109421451::NW_021838153.1:117740683-117741183	LOC109432557::NW_021838153.1:124757425-124757925
373	LOC109432562::NW_021838153.1:117795702-117796202	LOC109421447::NW_021838153.1:124811954-124812454
374	LOC109432569::NW_021838153.1:117973274-117973774	LOC109421437::NW_021838153.1:124981490-124981990
375	LOC109421435::NW_021838153.1:117992342-117992842	LOC109432573::NW_021838153.1:124988223-124988723
376	LOC109408421::NW_021838153.1:94857374-94857874	LOC109432577::NW_021838687.1:29720898-29721398
377	LOC109432602::NW_021837045.1:30479134-30479634	LOC109419343::NW_021837489.1:9109917-9110417
378	LOC109432765::NW_021838776.1:4203672-4204172	LOC109407890::NW_021838776.1:4336856-4337356
379	LOC109416620::NW_021837267.1:56409696-56410196	LOC109432816::NW_021837267.1:58374878-58375378
380	LOC109432818::NW_021837267.1:57489752-57490252	LOC109416607::NW_021837267.1:57829407-57829907
381	LOC109432845::NW_021837267.1:53369750-53370250	LOC109416636::NW_021837267.1:56003871-56004371
382	LOC109401369::NW_021837046.1:21923019-21923519	LOC109432873::NW_021838863.1:44590-45090
383	LOC109432956::NW_021838565.1:2581384-2581884	LOC109397684::NW_021838565.1:4509427-4509927
384	LOC109432996::NW_021838565.1:3983075-3983575	LOC109397575::NW_021838706.1:54679-55179
385	LOC109411315::NW_021837046.1:12144725-12145225	LOC109433042::NW_021837046.1:12859862-12860362
386	LOC109433068::NW_021839032.1:328800-329300	LOC109404651::NW_021839230.1:267835-268335
387	LOC109433069::NW_021839032.1:172944-173444	LOC109404652::NW_021839230.1:126293-126793
388	LOC109411275::NW_021837046.1:12063487-12063987	LOC109433070::NW_021837046.1:12674055-12674555
389	LOC109420252::NW_021837046.1:1453364-1453864	LOC109433086::NW_021837046.1:5493205-5493705
390	LOC109420215::NW_021837046.1:1979876-1980376	LOC109433090::NW_021837046.1:6179905-6180405
391	LOC109404663::NW_021839032.1:152122-152622	LOC109433130::NW_021839230.1:92364-92864
392	LOC109402266::NW_021838909.1:69349466-69349966	LOC109433171::NW_021838909.1:70832447-70832947
393	LOC109433206::NW_021838909.1:62047340-62047840	LOC109402290::NW_021838909.1:71238634-71239134
394	LOC109424435::NW_021837046.1:54720587-54721087	LOC109433263::NW_021839093.1:155675-156175
395	LOC109433264::NW_021837046.1:55028064-55028564	LOC109424282::NW_021837046.1:55431916-55432416
396	LOC109433364::NW_021837045.1:149673955-149674455	LOC109399347::NW_021837700.1:1085526-1086026
397	LOC109410673::NW_021838465.1:99074090-99074590	LOC109433510::NW_021838465.1:99087216-99087716
398	LOC109412587::NW_021839130.1:16776524-16777024	LOC109433602::NW_021839130.1:17984724-17985224
399	LOC109621263::NW_021838042.1:15364713-15365213	LOC109404201::NW_021838042.1:19249253-19249753
400	LOC109621273::NW_021838465.1:70221694-70222194	LOC109425587::NW_021838465.1:72801881-72802381
401	LOC109422856::NW_021838665.1:2278506-2279006	LOC109621280::NW_021838665.1:3436570-3437070
402	LOC109405048::NW_021837045.1:160078042-160078542	LOC109621306::NW_021837045.1:162222000-162222500
403	LOC109621310::NW_021838153.1:78495251-78495751	LOC109408584::NW_021838514.1:161920-162420
404	LOC109621320::NW_021838465.1:88711404-88711904	LOC109431564::NW_021838693.1:366304-366804
405	LOC109621579::NW_021838610.1:224788-225288	LOC109400097::NW_021838610.1:3340568-3341068
406	LOC109430841::NW_021837931.1:10044787-10045287	LOC109621615::NW_021839020.1:18883847-18884347
407	LOC109400054::NW_021837083.1:83792-84292	LOC109621621::NW_021838610.1:3672035-3672535
408	LOC109400053::NW_021837083.1:106389-106889	LOC109621622::NW_021838610.1:3701238-3701738
409	LOC109621653::NW_021838401.1:956136-956636	LOC109404547::NW_021838576.1:23305283-23305783
410	LOC109621663::NW_021838401.1:966407-966907	LOC109404547::NW_021838576.1:23305283-23305783
411	LOC109621653::NW_021838401.1:956136-956636	LOC109621663::NW_021838401.1:966407-966907
412	LOC109621664::NW_021838576.1:23384378-23384878	LOC109400639::NW_021838576.1:23401460-23401960
413	LOC109404203::NW_021838042.1:15166164-15166664	LOC109621803::NW_021838042.1:19056545-19057045
414	LOC109621654::NW_021838401.1:956788-957288	LOC109621825::NW_021838576.1:23305935-23306435
415	LOC109621915::NW_021837489.1:16186879-16187379	LOC109397422::NW_021837489.1:17748507-17749007
416	LOC109417987::NW_021838466.1:6721329-6721829	LOC109621925::NW_021838466.1:7262012-7262512
417	LOC109621931::NW_021838466.1:6857815-6858315	LOC109417993::NW_021838466.1:7369983-7370483
418	LOC109415048::NW_021838042.1:15808745-15809245	LOC109621958::NW_021838042.1:19564576-19565076
419	LOC109415051::NW_021838042.1:15969504-15970004	LOC109621961::NW_021838042.1:19747828-19748328
420	LOC109622063::NW_021837045.1:160501651-160502151	LOC109405054::NW_021837045.1:162667898-162668398
421	LOC109622097::NW_021837045.1:153652916-153653416	LOC109413927::NW_021837045.1:161584138-161584638
422	LOC109408648::NW_021838576.1:98497911-98498411	LOC109622197::NW_021838576.1:113951155-113951655
423	LOC109408643::NW_021838576.1:113676811-113677311	LOC109622200::NW_021838576.1:98549945-98550445
424	LOC109622250::NW_021838233.1:2458985-2459485	LOC109414432::NW_021838233.1:9593388-9593888
425	LOC109414455::NW_021838233.1:5978295-5978795	LOC109622262::NW_021838233.1:8370708-8371208
426	LOC109622263::NW_021838233.1:5961490-5961990	LOC109414456::NW_021838233.1:8348355-8348855
427	LOC109414462::NW_021838233.1:5802000-5802500	LOC109622267::NW_021838233.1:8179249-8179749
428	LOC109622269::NW_021838233.1:5707629-5708129	LOC109414464::NW_021838233.1:8073432-8073932
429	LOC109416440::NW_021837045.1:164908259-164908759	LOC109622371::NW_021838410.1:12230314-12230814
430	LOC109414426::NW_021838233.1:9670202-9670702	LOC109622534::NW_021838508.1:629852-630352
431	LOC109429644::NW_021837378.1:175638-176138	LOC109622651::NW_021837378.1:13301532-13302032
432	LOC109622652::NW_021837378.1:265693-266193	LOC109429646::NW_021837378.1:13388810-13389310
433	LOC109622706::NW_021838562.1:200915-201415	LOC109419960::NW_021838562.1:217736-218236
434	LOC109422857::NW_021838665.1:2253770-2254270	LOC109622707::NW_021838665.1:3420469-3420969
435	LOC109419975::NW_021838153.1:100166924-100167424	LOC109622845::NW_021838799.1:2032291-2032791
436	LOC109409074::NW_021838909.1:45572785-45573285	LOC109622975::NW_021838909.1:46300664-46301164
437	LOC109420580::NW_021837046.1:2254850-2255350	LOC109623154::NW_021837046.1:3001467-3001967
438	LOC109420635::NW_021837046.1:2121607-2122107	LOC109623155::NW_021837046.1:2850923-2851423
439	LOC109433293::NW_021838681.1:356303-356803	LOC109623165::NW_021838909.1:65427974-65428474
440	LOC109623401::NW_021837378.1:11554813-11555313	LOC109429618::NW_021838289.1:698749-699249
441	LOC115253425::NW_021838576.1:106463686-106464186	LOC109401008::NW_021838576.1:122845211-122845711
442	LOC109399541::NW_021837931.1:1533534-1534034	LOC115253429::NW_021837931.1:3543367-3543867
443	LOC115253439::NW_021837878.1:48287-48787	LOC109402206::NW_021838421.1:4806887-4807387
444	LOC115253442::NW_021838646.1:147048-147548	LOC109400309::NW_021838712.1:141933-142433
445	LOC115253475::NW_021837083.1:71071-71571	LOC109621269::NW_021838610.1:3659611-3660111
446	LOC109407510::NW_021838687.1:27545943-27546443	LOC115253476::NW_021838711.1:271900-272400
447	LOC109420509::NW_021838687.1:28195477-28195977	LOC115253476::NW_021838711.1:271900-272400
448	LOC109426017::NW_021838465.1:119879377-119879877	LOC115253491::NW_021838465.1:123715303-123715803
449	LOC109400409::NW_021837316.1:18552-19052	LOC115253495::NW_021839130.1:64744724-64745224
450	LOC109405016::NW_021837045.1:157964105-157964605	LOC115253496::NW_021837045.1:159008532-159009032
451	LOC109430035::NW_021838432.1:7879041-7879541	LOC115253499::NW_021838432.1:9463954-9464454
452	LOC115253502::NW_021838736.1:46961-47461	LOC109421066::NW_021839020.1:61928520-61929020
453	LOC115253540::NW_021837045.1:1097667-1098167	LOC109418306::NW_021838517.1:168583-169083
454	LOC109422424::NW_021838909.1:90186312-90186812	LOC115253551::NW_021838909.1:90609794-90610294
455	LOC109411630::NW_021837267.1:34938687-34939187	LOC115253574::NW_021837267.1:37390622-37391122
456	LOC115253592::NW_021838576.1:100828986-100829486	LOC109420811::NW_021838910.1:2556334-2556834
457	LOC115253599::NW_021837267.1:32595861-32596361	LOC109409022::NW_021837267.1:33342287-33342787
458	LOC115253602::NW_021837267.1:27360120-27360620	LOC109429157::NW_021837267.1:30824427-30824927
459	LOC115253605::NW_021838576.1:70879988-70880488	LOC109423771::NW_021838576.1:72193332-72193832
460	LOC115253614::NW_021838925.1:146762-147262	LOC109429778::NW_021838153.1:110798950-110799450
461	LOC115253616::NW_021838687.1:48135676-48136176	LOC109420724::NW_021838687.1:49083045-49083545
462	LOC115253648::NW_021838576.1:86750196-86750696	LOC109404269::NW_021838576.1:86902203-86902703
463	LOC109397804::NW_021838688.1:856656-857156	LOC115253654::NW_021838688.1:2794595-2795095
464	LOC115253661::NW_021838687.1:77270769-77271269	LOC109417703::NW_021838687.1:80217003-80217503
465	LOC115253664::NW_021838909.1:78247454-78247954	LOC109403404::NW_021838909.1:79745552-79746052
466	LOC109398046::NW_021837149.1:8917-9417	LOC115253668::NW_021838454.1:7781301-7781801
467	LOC109426115::NW_021838454.1:5990051-5990551	LOC115253668::NW_021838454.1:7781301-7781801
468	LOC115253670::NW_021838798.1:44224035-44224535	LOC109427533::NW_021838798.1:45261943-45262443
469	LOC109419400::NW_021838687.1:64876743-64877243	LOC115253681::NW_021838687.1:65987244-65987744
470	LOC109411639::NW_021837123.1:1589583-1590083	LOC115253690::NW_021837123.1:1883029-1883529
471	LOC115253695::NW_021837045.1:64884350-64884850	LOC109411331::NW_021837045.1:66276030-66276530
472	LOC115253717::NW_021837489.1:41409153-41409653	LOC109407901::NW_021837489.1:43920146-43920646
473	LOC115253722::NW_021838687.1:52081460-52081960	LOC109419933::NW_021838687.1:53132336-53132836
474	LOC109420733::NW_021838687.1:53771758-53772258	LOC115253722::NW_021838687.1:52081460-52081960
475	LOC109408342::NW_021838465.1:74605540-74606040	LOC115253736::NW_021838465.1:75971852-75972352
476	LOC109399713::NW_021837711.1:40728745-40729245	LOC115253738::NW_021837711.1:45632961-45633461
477	LOC109427925::NW_021838233.1:13469556-13470056	LOC115253749::NW_021838233.1:17536480-17536980
478	LOC109428244::NW_021838589.1:94330-94830	LOC115253750::NW_021838233.1:17231415-17231915
479	LOC115253750::NW_021838233.1:17231415-17231915	LOC115253749::NW_021838233.1:17536480-17536980
480	LOC109411332::NW_021837045.1:64946784-64947284	LOC115253766::NW_021837045.1:66859165-66859665
481	LOC109427070::NW_021837045.1:66336107-66336607	LOC115253766::NW_021837045.1:66859165-66859665
482	LOC115253778::NW_021838909.1:11791280-11791780	LOC109413081::NW_021838909.1:13041462-13041962
483	LOC109415839::NW_021838909.1:38576958-38577458	LOC115253781::NW_021839108.1:902777-903277
484	LOC115253783::NW_021838687.1:78719176-78719676	LOC115253661::NW_021838687.1:77270769-77271269
485	LOC109400192::NW_021837045.1:87968092-87968592	LOC115253789::NW_021837045.1:89920416-89920916
486	LOC109409579::NW_021837045.1:143229935-143230435	LOC115253790::NW_021837045.1:144665262-144665762
487	LOC109428240::NW_021838233.1:14160660-14161160	LOC115253791::NW_021838233.1:18609493-18609993
488	LOC115253815::NW_021838098.1:621792-622292	LOC109409366::NW_021838399.1:1157577-1158077
489	LOC115253820::NW_021838233.1:2100349-2100849	LOC109622253::NW_021838233.1:9295303-9295803
490	LOC109420505::NW_021838687.1:27491800-27492300	LOC115253828::NW_021838687.1:28149206-28149706
491	LOC109398973::NW_021838472.1:359317-359817	LOC115253841::NW_021838569.1:272580-273080
492	LOC109430913::NW_021837600.1:9482664-9483164	LOC115253853::NW_021837600.1:11430998-11431498
493	LOC115253880::NW_021838233.1:5598249-5598749	LOC109621255::NW_021838233.1:7965746-7966246
494	LOC115253911::NW_021838688.1:884949-885449	LOC109397811::NW_021838688.1:1701644-1702144
495	LOC115253927::NW_021838621.1:5099847-5100347	LOC109426368::NW_021838865.1:232171-232671
496	LOC109419080::NW_021838586.1:392145-392645	LOC115253928::NW_021838632.1:4109174-4109674
497	LOC115253929::NW_021838646.1:216287-216787	LOC109399667::NW_021838712.1:210037-210537
498	LOC109420559::NW_021838595.1:517670-518170	LOC115253937::NW_021838687.1:45100146-45100646
499	LOC115253950::NW_021838687.1:84273119-84273619	LOC109622164::NW_021838687.1:84582623-84583123
500	LOC109403808::NW_021838465.1:50348375-50348875	LOC115253953::NW_021838712.1:14006-14506
501	LOC115253981::NW_021838832.1:2661782-2662282	LOC109402806::NW_021838832.1:2891674-2892174
502	LOC115253986::NW_021837046.1:27333610-27334110	LOC109412376::NW_021837046.1:30909061-30909561
503	LOC115253987::NW_021838909.1:45677825-45678325	LOC109622970::NW_021838909.1:46403866-46404366
504	LOC109399999::NW_021838909.1:88202082-88202582	LOC115253992::NW_021838909.1:94251092-94251592
505	LOC109422445::NW_021838909.1:87751770-87752270	LOC115253992::NW_021838909.1:94251092-94251592
506	LOC109622882::NW_021837046.1:44627771-44628271	LOC115254005::NW_021837046.1:45118766-45119266
507	LOC115254008::NW_021837046.1:49135812-49136312	LOC109428226::NW_021838233.1:14453375-14453875
508	LOC109623304::NW_021837489.1:34052542-34053042	LOC115254011::NW_021839011.1:144985-145485
509	LOC115253667::NW_021837489.1:32788226-32788726	LOC115254011::NW_021839011.1:144985-145485
510	LOC109414327::NW_021839020.1:50834907-50835407	LOC115254012::NW_021839020.1:52400939-52401439
511	LOC115254017::NW_021839020.1:18296353-18296853	LOC109621501::NW_021839020.1:18926093-18926593
512	LOC115254025::NW_021839020.1:29177985-29178485	LOC109404870::NW_021839020.1:29506988-29507488
513	LOC115254045::NW_021837123.1:1693051-1693551	LOC109411665::NW_021837267.1:37232558-37233058
514	LOC115254049::NW_021837156.1:21490363-21490863	LOC109422772::NW_021837156.1:28068939-28069439
515	LOC109427762::NW_021837156.1:49574335-49574835	LOC115254055::NW_021837156.1:51176562-51177062
516	LOC109410890::NW_021837045.1:122919780-122920280	LOC115254065::NW_021837045.1:124575401-124575901
517	LOC115254069::NW_021837267.1:35444619-35445119	LOC109411620::NW_021837267.1:37895252-37895752
518	LOC115254071::NW_021837267.1:37012648-37013148	LOC109411640::NW_021837123.1:1480903-1481403
519	LOC115254074::NW_021837267.1:39680741-39681241	LOC109427211::NW_021837267.1:44206118-44206618
520	LOC109404470::NW_021837267.1:45271934-45272434	LOC115254076::NW_021837267.1:46330329-46330829
521	LOC109406325::NW_021837267.1:45437452-45437952	LOC115254078::NW_021837267.1:46520338-46520838
522	LOC115254094::NW_021837045.1:7505286-7505786	LOC109418203::NW_021837045.1:8912437-8912937
523	LOC115254111::NW_021837711.1:11255015-11255515	LOC109432127::NW_021837711.1:20188448-20188948
524	LOC109402036::NW_021837711.1:44961379-44961879	LOC115254114::NW_021837711.1:45182059-45182559
525	LOC109414597::NW_021837822.1:30005795-30006295	LOC115254116::NW_021837822.1:31292855-31293355
526	LOC109429591::NW_021837378.1:8506099-8506599	LOC115254140::NW_021838031.1:137885-138385
527	LOC115254141::NW_021838042.1:5455129-5455629	LOC109425181::NW_021838042.1:5886672-5887172
528	LOC109431766::NW_021837045.1:46112147-46112647	LOC115254142::NW_021837045.1:47498807-47499307
529	LOC109432528::NW_021838153.1:118004613-118005113	LOC115254154::NW_021838153.1:125011441-125011941
530	LOC115254178::NW_021837045.1:102272165-102272665	LOC109423854::NW_021837045.1:103036078-103036578
531	LOC115254198::NW_021838465.1:50780897-50781397	LOC109405470::NW_021838887.1:2201322-2201822
532	LOC109425935::NW_021838465.1:130680131-130680631	LOC115254207::NW_021838465.1:134070453-134070953
533	LOC115254217::NW_021838504.1:399720-400220	LOC109426332::NW_021838932.1:1703942-1704442
534	LOC115254230::NW_021838554.1:4980771-4981271	LOC109424538::NW_021838719.1:152374-152874
535	LOC115254243::NW_021838576.1:15381769-15382269	LOC109402733::NW_021838576.1:17621417-17621917
536	LOC115254254::NW_021838576.1:56166897-56167397	LOC109408591::NW_021838576.1:56315528-56316028
537	LOC109430605::NW_021837315.1:22412-22912	LOC115254256::NW_021838576.1:69370340-69370840
538	LOC115254261::NW_021838576.1:98594516-98595016	LOC109408640::NW_021838576.1:113728665-113729165
539	LOC109622167::NW_021838576.1:114036771-114037271	LOC115254261::NW_021838576.1:98594516-98595016
540	LOC109404375::NW_021838576.1:90431857-90432357	LOC115254264::NW_021838576.1:118337091-118337591
541	LOC109419874::NW_021838595.1:240400-240900	LOC115254266::NW_021838595.1:258039-258539
542	LOC115254293::NW_021838609.1:22602-23102	LOC109397264::NW_021838632.1:313255-313755
543	LOC115254310::NW_021838610.1:6101671-6102171	LOC109429803::NW_021838645.1:312846-313346
544	LOC115254345::NW_021838610.1:2272650-2273150	LOC109413561::NW_021839020.1:69891931-69892431
545	LOC115254485::NW_021838624.1:222745-223245	LOC109427440::NW_021838798.1:22203183-22203683
546	LOC109430395::NW_021837156.1:61036371-61036871	LOC115254515::NW_021838628.1:378750-379250
547	LOC115254517::NW_021838628.1:481966-482466	LOC109427421::NW_021838798.1:21246290-21246790
548	LOC109423210::NW_021838406.1:213505-214005	LOC115254535::NW_021838632.1:1260955-1261455
549	LOC115254603::NW_021838643.1:3210185-3210685	LOC115254604::NW_021838643.1:3213144-3213644
550	LOC115254603::NW_021838643.1:3210185-3210685	LOC115254605::NW_021838643.1:3216103-3216603
551	LOC115254604::NW_021838643.1:3213144-3213644	LOC115254605::NW_021838643.1:3216103-3216603
552	LOC109424914::NW_021837600.1:26878993-26879493	LOC115254615::NW_021838643.1:4595692-4596192
553	LOC115254659::NW_021838654.1:1947676-1948176	LOC115254660::NW_021838654.1:2009144-2009644
554	LOC109424441::NW_021838654.1:2573076-2573576	LOC115254683::NW_021838654.1:3842661-3843161
555	LOC109422349::NW_021838654.1:3758335-3758835	LOC115254695::NW_021838654.1:5067462-5067962
556	LOC109397296::NW_021838343.1:20218652-20219152	LOC115254707::NW_021838655.1:143415-143915
557	LOC115254756::NW_021838665.1:2236086-2236586	LOC109422850::NW_021838665.1:3410596-3411096
558	LOC109422853::NW_021838665.1:2239278-2239778	LOC115254779::NW_021838665.1:3413851-3414351
559	LOC109422854::NW_021838665.1:2237725-2238225	LOC115254780::NW_021838665.1:3412297-3412797
560	LOC109410801::NW_021838576.1:32805679-32806179	LOC115254797::NW_021838671.1:148075-148575
561	LOC109407442::NW_021837600.1:36010121-36010621	LOC115254860::NW_021838682.1:64818-65318
562	LOC109416681::NW_021837600.1:36178428-36178928	LOC115254863::NW_021838682.1:178170-178670
563	LOC109407398::NW_021838682.1:275490-275990	LOC115254870::NW_021838682.1:367376-367876
564	LOC115254888::NW_021838687.1:57116613-57117113	LOC109397483::NW_021838687.1:57124020-57124520
565	LOC109428093::NW_021838404.1:199054-199554	LOC115254947::NW_021838687.1:3160081-3160581
566	LOC109419911::NW_021838443.1:9256984-9257484	LOC115254960::NW_021838687.1:6319322-6319822
567	LOC115254972::NW_021838687.1:12657911-12658411	LOC115254988::NW_021838687.1:13913922-13914422
568	LOC115255001::NW_021838687.1:16142138-16142638	LOC109398259::NW_021838687.1:17184797-17185297
569	LOC109419784::NW_021838687.1:16723092-16723592	LOC115255008::NW_021838687.1:17789330-17789830
570	LOC115255011::NW_021838687.1:18384409-18384909	LOC109419784::NW_021838687.1:16723092-16723592
571	LOC115255017::NW_021838687.1:21213082-21213582	LOC109419754::NW_021838687.1:22698060-22698560
572	LOC115253936::NW_021838687.1:23542941-23543441	LOC115255044::NW_021838687.1:25331725-25332225
573	LOC115255129::NW_021838687.1:46766954-46767454	LOC115255131::NW_021838687.1:46775127-46775627
574	LOC115255161::NW_021838687.1:53195096-53195596	LOC109420569::NW_021838687.1:53831793-53832293
575	LOC115255162::NW_021838687.1:53208285-53208785	LOC109419941::NW_021838687.1:53844630-53845130
576	LOC109419932::NW_021838687.1:51987354-51987854	LOC115255165::NW_021838687.1:53713527-53714027
577	LOC109419951::NW_021838687.1:53300496-53300996	LOC115255169::NW_021838687.1:53935146-53935646
578	LOC109419958::NW_021838687.1:54582548-54583048	LOC115255172::NW_021838687.1:54988369-54988869
579	LOC115253798::NW_021838687.1:57129496-57129996	LOC115255182::NW_021838687.1:57122079-57122579
580	LOC115255181::NW_021838687.1:57114672-57115172	LOC115255182::NW_021838687.1:57122079-57122579
581	LOC115255183::NW_021838687.1:57121425-57121925	LOC109397494::NW_021838687.1:60350854-60351354
582	LOC115255183::NW_021838687.1:57121425-57121925	LOC109397504::NW_021838687.1:60343741-60344241
583	LOC109397485::NW_021838687.1:59372426-59372926	LOC115255205::NW_021838687.1:59379429-59379929
584	LOC109397477::NW_021838687.1:59376988-59377488	LOC115255206::NW_021838687.1:59383990-59384490
585	LOC115255206::NW_021838687.1:59383990-59384490	LOC109407175::NW_021838687.1:59391003-59391503
586	LOC109397478::NW_021838687.1:59380083-59380583	LOC115255207::NW_021838687.1:59387083-59387583
587	LOC109397485::NW_021838687.1:59372426-59372926	LOC115255208::NW_021838687.1:59386429-59386929
588	LOC115255205::NW_021838687.1:59379429-59379929	LOC115255208::NW_021838687.1:59386429-59386929
589	LOC115255201::NW_021838687.1:59355137-59355637	LOC115255221::NW_021838687.1:60368983-60369483
590	LOC115255223::NW_021838687.1:60366193-60366693	LOC109407186::NW_021838687.1:60373292-60373792
591	LOC115255230::NW_021838687.1:60873211-60873711	LOC109415073::NW_021838687.1:61316609-61317109
592	LOC109417757::NW_021838687.1:69379766-69380266	LOC115255285::NW_021838687.1:69667657-69668157
593	LOC109417758::NW_021838687.1:69373815-69374315	LOC115255289::NW_021838687.1:69661692-69662192
594	LOC109420013::NW_021838687.1:67808079-67808579	LOC115255289::NW_021838687.1:69661692-69662192
595	LOC115255328::NW_021838687.1:77288393-77288893	LOC109417702::NW_021838687.1:78730038-78730538
596	LOC109417704::NW_021838687.1:78236084-78236584	LOC115255343::NW_021838687.1:78671957-78672457
597	LOC115255431::NW_021838687.1:28083208-28083708	LOC109407410::NW_021838687.1:28665919-28666419
598	LOC115255204::NW_021838687.1:59375003-59375503	LOC115255469::NW_021838687.1:59382006-59382506
599	LOC115255209::NW_021838687.1:59389006-59389506	LOC115255469::NW_021838687.1:59382006-59382506
600	LOC109410239::NW_021838687.1:93164552-93165052	LOC115255525::NW_021838687.1:99030974-99031474
601	LOC109416200::NW_021838687.1:7937166-7937666	LOC115255534::NW_021838687.1:8331903-8332403
602	LOC115255622::NW_021838688.1:870989-871489	LOC109405346::NW_021838688.1:2820744-2821244
603	LOC109405351::NW_021838688.1:649542-650042	LOC115255632::NW_021838688.1:1467995-1468495
604	LOC109405342::NW_021838688.1:1305702-1306202	LOC115255641::NW_021838688.1:2063774-2064274
605	LOC115255642::NW_021838688.1:2613429-2613929	LOC109405351::NW_021838688.1:649542-650042
606	LOC109405354::NW_021838688.1:1053751-1054251	LOC115255646::NW_021838688.1:2952194-2952694
607	LOC109413635::NW_021837600.1:18703564-18704064	LOC115255658::NW_021838688.1:831796-832296
608	LOC115255686::NW_021838694.1:76493-76993	LOC109402290::NW_021838909.1:71238634-71239134
609	LOC109412205::NW_021838699.1:1172032-1172532	LOC115255706::NW_021838699.1:1238183-1238683
610	LOC115255855::NW_021838719.1:306046-306546	LOC109424538::NW_021838719.1:152374-152874
611	LOC109403694::NW_021838721.1:2425950-2426450	LOC115255897::NW_021838721.1:2348190-2348690
612	LOC109414137::NW_021837267.1:21238101-21238601	LOC115255905::NW_021838723.1:71834-72334
613	LOC115255379::NW_021838687.1:82914112-82914612	LOC115256013::NW_021838743.1:3133194-3133694
614	LOC109408992::NW_021838743.1:24055-24555	LOC115256017::NW_021838743.1:3939367-3939867
615	LOC109414079::NW_021838754.1:318617-319117	LOC115256087::NW_021838754.1:889234-889734
616	LOC109414080::NW_021838754.1:355252-355752	LOC115256088::NW_021838754.1:917927-918427
617	LOC115256057::NW_021838753.1:248506-249006	LOC115256168::NW_021838765.1:3387948-3388448
618	LOC109423289::NW_021838576.1:67343307-67343807	LOC115256200::NW_021838776.1:3346527-3347027
619	LOC115256255::NW_021838787.1:172742-173242	LOC109410820::NW_021838395.1:900772-901272
620	LOC115256256::NW_021838787.1:184056-184556	LOC109410819::NW_021838395.1:916074-916574
621	LOC109430093::NW_021838798.1:60832095-60832595	LOC115256340::NW_021838798.1:61775991-61776491
622	LOC115256387::NW_021838798.1:21171800-21172300	LOC109413561::NW_021839020.1:69891931-69892431
623	LOC115256435::NW_021837046.1:4635790-4636290	LOC109401747::NW_021838153.1:60102012-60102512
624	LOC115256527::NW_021838798.1:27774675-27775175	LOC115256568::NW_021838798.1:28494597-28495097
625	LOC115256597::NW_021838798.1:43703611-43704111	LOC109427548::NW_021838798.1:42899076-42899576
626	LOC109411294::NW_021837046.1:8706229-8706729	LOC115256606::NW_021837046.1:9489667-9490167
627	LOC115256616::NW_021838798.1:62961162-62961662	LOC115253775::NW_021838798.1:63865917-63866417
628	LOC115255630::NW_021838688.1:1327859-1328359	LOC115256618::NW_021837046.1:9849951-9850451
629	LOC115256674::NW_021838798.1:23630628-23631128	LOC115256547::NW_021838798.1:23634353-23634853
630	LOC115256666::NW_021837046.1:10376527-10377027	LOC115256687::NW_021837046.1:10709388-10709888
631	LOC115256721::NW_021838798.1:27786265-27786765	LOC115256724::NW_021838798.1:28523048-28523548
632	LOC115256787::NW_021838798.1:76099270-76099770	LOC109408146::NW_021839153.1:1227258-1227758
633	LOC115256864::NW_021838798.1:94430218-94430718	LOC115253826::NW_021838798.1:94972223-94972723
634	LOC115256865::NW_021837046.1:14528310-14528810	LOC109432892::NW_021837046.1:16394907-16395407
635	LOC109418021::NW_021838153.1:100311685-100312185	LOC115256935::NW_021838799.1:2153481-2153981
636	LOC115256946::NW_021838803.1:19213-19713	LOC109420358::NW_021838909.1:53588829-53589329
637	LOC109407623::NW_021838465.1:129554606-129555106	LOC115256948::NW_021838804.1:267000-267500
638	LOC109412679::NW_021838798.1:46558590-46559090	LOC115256959::NW_021838807.1:110218-110718
639	LOC109420915::NW_021837931.1:25239836-25240336	LOC115256988::NW_021838810.1:1627846-1628346
640	LOC115257141::NW_021838851.1:93480-93980	LOC109427421::NW_021838798.1:21246290-21246790
641	LOC109422203::NW_021838503.1:52258-52758	LOC115257163::NW_021838854.1:1145846-1146346
642	LOC109414156::NW_021838621.1:5328016-5328516	LOC115257194::NW_021838865.1:466990-467490
643	LOC109414154::NW_021838621.1:5270088-5270588	LOC115257197::NW_021838865.1:416778-417278
644	LOC109414159::NW_021838621.1:5556568-5557068	LOC115257198::NW_021838865.1:829302-829802
645	LOC115257193::NW_021838865.1:78089-78589	LOC115257201::NW_021838865.1:89533-90033
646	LOC115254472::NW_021838621.1:5561676-5562176	LOC115257207::NW_021838865.1:834997-835497
647	LOC109408803::NW_021838153.1:34207605-34208105	LOC115257208::NW_021838865.1:172129-172629
648	LOC109420798::NW_021838576.1:100094770-100095270	LOC115257234::NW_021838874.1:214425-214925
649	LOC115257249::NW_021837046.1:24057525-24058025	LOC109418287::NW_021837600.1:8537061-8537561
650	LOC115257102::NW_021838843.1:3491909-3492409	LOC115257259::NW_021838881.1:32901-33401
651	LOC109415355::NW_021838687.1:60534691-60535191	LOC115257262::NW_021838882.1:27853-28353
652	LOC109429250::NW_021837045.1:19696572-19697072	LOC115257321::NW_021838896.1:3752-4252
653	LOC109622686::NW_021838684.1:416408-416908	LOC115257321::NW_021838896.1:3752-4252
654	LOC109431111::NW_021838410.1:5496529-5497029	LOC115257393::NW_021838909.1:29998659-29999159
655	LOC115257399::NW_021838909.1:61713800-61714300	LOC109433189::NW_021838909.1:70934005-70934505
656	LOC115257405::NW_021838909.1:45536050-45536550	LOC109409076::NW_021838909.1:46268608-46269108
657	LOC115257413::NW_021838909.1:7517622-7518122	LOC109430704::NW_021838909.1:10328444-10328944
658	LOC115257414::NW_021838909.1:7439033-7439533	LOC109430705::NW_021838909.1:10248017-10248517
659	LOC115257418::NW_021838909.1:69441977-69442477	LOC109433189::NW_021838909.1:70934005-70934505
660	LOC109429947::NW_021838909.1:7035175-7035675	LOC115257422::NW_021838909.1:7783991-7784491
661	LOC109403273::NW_021838909.1:40114696-40115196	LOC115257427::NW_021838909.1:40253546-40254046
662	LOC109402277::NW_021838909.1:69139389-69139889	LOC115257440::NW_021838909.1:70583054-70583554
663	LOC115257445::NW_021838909.1:78632053-78632553	LOC109403450::NW_021838909.1:80135821-80136321
664	LOC115257450::NW_021838909.1:61650701-61651201	LOC109402270::NW_021838909.1:70863444-70863944
665	LOC115257454::NW_021838909.1:78511095-78511595	LOC109403413::NW_021838909.1:80026591-80027091
666	LOC109403539::NW_021837600.1:18881535-18882035	LOC115257462::NW_021838909.1:67238097-67238597
667	LOC115257485::NW_021838909.1:78403714-78404214	LOC115257446::NW_021838909.1:79908908-79909408
668	LOC109403448::NW_021838909.1:78746426-78746926	LOC115257534::NW_021838909.1:80248254-80248754
669	LOC115257428::NW_021837046.1:29667399-29667899	LOC115257540::NW_021837046.1:32139430-32139930
670	LOC109406151::NW_021838153.1:71038447-71038947	LOC115257542::NW_021838909.1:76999657-77000157
671	LOC109414318::NW_021838343.1:6789733-6790233	LOC115257568::NW_021838909.1:1454629-1455129
672	LOC109416733::NW_021838909.1:76615927-76616427	LOC115257573::NW_021838909.1:79218816-79219316
673	LOC115257574::NW_021838909.1:2447715-2448215	LOC109410078::NW_021838909.1:3841124-3841624
674	LOC109400007::NW_021837578.1:1071032-1071532	LOC115257584::NW_021838909.1:86643241-86643741
675	LOC115257605::NW_021838909.1:19751888-19752388	LOC109422451::NW_021838754.1:57794-58294
676	LOC115257652::NW_021838909.1:2311997-2312497	LOC109430221::NW_021838909.1:3701144-3701644
677	LOC109415466::NW_021838821.1:1485723-1486223	LOC115257667::NW_021838909.1:20725632-20726132
678	LOC109418717::NW_021838576.1:95524012-95524512	LOC115257678::NW_021838909.1:77457054-77457554
679	LOC109403387::NW_021838909.1:77020753-77021253	LOC115257705::NW_021838909.1:82413452-82413952
680	LOC115257717::NW_021838909.1:32391016-32391516	LOC109415957::NW_021838909.1:33201141-33201641
681	LOC115257750::NW_021838909.1:89700289-89700789	LOC115257751::NW_021838909.1:89305685-89306185
682	LOC115257760::NW_021838909.1:61790462-61790962	LOC109433186::NW_021838909.1:69529091-69529591
683	LOC109413132::NW_021838909.1:18814945-18815445	LOC115257787::NW_021838909.1:18846700-18847200
684	LOC109408247::NW_021838832.1:1223499-1223999	LOC115257791::NW_021838909.1:41985033-41985533
685	LOC109433186::NW_021838909.1:69529091-69529591	LOC115257839::NW_021838909.1:71016309-71016809
686	LOC115257473::NW_021838909.1:77723639-77724139	LOC115257851::NW_021838909.1:77745958-77746458
687	LOC109399985::NW_021838909.1:75846436-75846936	LOC115257866::NW_021838909.1:85509965-85510465
688	LOC115257867::NW_021838909.1:85669633-85670133	LOC115254960::NW_021838687.1:6319322-6319822
689	LOC115257874::NW_021838909.1:92523066-92523566	LOC109399985::NW_021838909.1:75846436-75846936
690	LOC109402267::NW_021838909.1:69370809-69371309	LOC115257878::NW_021838909.1:70849238-70849738
691	LOC115257385::NW_021838909.1:78347724-78348224	LOC115257883::NW_021838909.1:79814807-79815307
692	LOC115257894::NW_021838909.1:69380803-69381303	LOC109402270::NW_021838909.1:70863444-70863944
693	LOC115257901::NW_021838909.1:10938103-10938603	LOC109429947::NW_021838909.1:7035175-7035675
694	LOC115257903::NW_021838909.1:2199056-2199556	LOC109410081::NW_021838909.1:3566406-3566906
695	LOC109622862::NW_021837046.1:43054188-43054688	LOC115257965::NW_021837046.1:43562352-43562852
696	LOC115257976::NW_021838910.1:1732015-1732515	LOC115257978::NW_021838910.1:2904969-2905469
697	LOC109412548::NW_021838576.1:101134057-101134557	LOC115257992::NW_021838910.1:1405227-1405727
698	LOC109412507::NW_021838910.1:1631396-1631896	LOC115257996::NW_021838910.1:2806998-2807498
699	LOC109622876::NW_021837046.1:44566465-44566965	LOC115258013::NW_021838919.1:223904-224404
700	LOC115258029::NW_021838921.1:3134806-3135306	LOC115258030::NW_021838921.1:3150963-3151463
701	LOC115257989::NW_021837046.1:43413198-43413698	LOC115258081::NW_021837046.1:43930053-43930553
702	LOC109397783::NW_021838554.1:2586659-2587159	LOC115258128::NW_021838938.1:219503-220003
703	LOC109411177::NW_021838432.1:708661-709161	LOC115258177::NW_021838948.1:148331-148831
704	LOC115258223::NW_021838965.1:2074887-2075387	LOC109621765::NW_021839020.1:1516953-1517453
705	LOC109423521::NW_021837489.1:21212422-21212922	LOC115258234::NW_021838969.1:23797-24297
706	LOC115258243::NW_021837046.1:48513229-48513729	LOC109622896::NW_021837046.1:49503920-49504420
707	LOC115258275::NW_021838976.1:1270627-1271127	LOC109406378::NW_021838976.1:1933816-1934316
708	LOC109405306::NW_021838976.1:1428455-1428955	LOC115258289::NW_021838976.1:2092067-2092567
709	LOC115258276::NW_021838976.1:1337829-1338329	LOC115258291::NW_021838976.1:1991498-1991998
710	LOC115258466::NW_021839020.1:36846922-36847422	LOC109407264::NW_021839020.1:39432269-39432769
711	LOC109410837::NW_021838477.1:2791257-2791757	LOC115258482::NW_021839020.1:46968081-46968581
712	LOC115255196::NW_021838687.1:11506222-11506722	LOC115258482::NW_021839020.1:46968081-46968581
713	LOC115255524::NW_021838687.1:97922840-97923340	LOC115258482::NW_021839020.1:46968081-46968581
714	LOC109405884::NW_021839020.1:43057935-43058435	LOC115258484::NW_021839020.1:47587665-47588165
715	LOC115258464::NW_021837046.1:49528634-49529134	LOC115258518::NW_021837046.1:49897539-49898039
716	LOC109397524::NW_021837489.1:7546338-7546838	LOC115258553::NW_021839020.1:14177242-14177742
717	LOC109421041::NW_021838736.1:48729-49229	LOC115258570::NW_021839020.1:61930640-61931140
718	LOC115258587::NW_021839020.1:30962704-30963204	LOC109404870::NW_021839020.1:29506988-29507488
719	LOC109419106::NW_021837523.1:667702-668202	LOC115258589::NW_021839020.1:5530120-5530620
720	LOC115258600::NW_021839020.1:18274917-18275417	LOC109397528::NW_021839020.1:18897307-18897807
721	LOC115258602::NW_021839020.1:1214641-1215141	LOC109409328::NW_021839020.1:5360277-5360777
722	LOC109407248::NW_021839020.1:50589588-50590088	LOC115258624::NW_021839020.1:52214325-52214825
723	LOC109409302::NW_021839020.1:4041371-4041871	LOC115258653::NW_021839020.1:8162293-8162793
724	LOC109414334::NW_021839020.1:53142586-53143086	LOC115258667::NW_021839020.1:54396681-54397181
725	LOC115258683::NW_021839020.1:34833027-34833527	LOC109398683::NW_021839020.1:31470947-31471447
726	LOC115258689::NW_021837046.1:54673149-54673649	LOC109424450::NW_021839093.1:90279-90779
727	LOC115258702::NW_021839020.1:29975069-29975569	LOC109398683::NW_021839020.1:31470947-31471447
728	LOC115258706::NW_021839020.1:57376489-57376989	LOC109408505::NW_021838637.1:223170-223670
729	LOC109397515::NW_021837045.1:171644599-171645099	LOC115258799::NW_021839020.1:76041912-76042412
730	LOC109414323::NW_021839020.1:50819398-50819898	LOC115258805::NW_021839020.1:52362070-52362570
731	LOC109417522::NW_021839020.1:79079991-79080491	LOC115258845::NW_021839020.1:79243251-79243751
732	LOC109410213::NW_021839020.1:79651614-79652114	LOC115258890::NW_021839020.1:80206069-80206569
733	LOC109417526::NW_021839020.1:79628965-79629465	LOC115258892::NW_021839020.1:80182224-80182724
734	LOC115258940::NW_021839020.1:23043187-23043687	LOC109418447::NW_021839020.1:27034621-27035121
735	LOC115259068::NW_021839032.1:837368-837868	LOC109433025::NW_021839230.1:985515-986015
736	LOC115259076::NW_021839032.1:393546-394046	LOC109433120::NW_021839230.1:362223-362723
737	LOC109432222::NW_021837711.1:12853026-12853526	LOC115259336::NW_021839103.1:77174-77674
738	LOC109409509::NW_021837046.1:56951476-56951976	LOC115259368::NW_021839119.1:467630-468130
739	LOC115259394::NW_021837046.1:17549354-17549854	LOC115259399::NW_021837046.1:17562055-17562555
740	LOC115259406::NW_021839130.1:54100483-54100983	LOC109403762::NW_021838510.1:2655259-2655759
741	LOC115259426::NW_021837046.1:21577979-21578479	LOC109413165::NW_021837600.1:46946949-46947449
742	LOC115259459::NW_021839130.1:59667884-59668384	LOC115259462::NW_021839130.1:61107525-61108025
743	LOC109412731::NW_021839130.1:59501078-59501578	LOC115259469::NW_021839130.1:60983881-60984381
744	LOC109420821::NW_021839130.1:39378510-39379010	LOC115259507::NW_021839130.1:39388255-39388755
745	LOC115259526::NW_021839130.1:8577307-8577807	LOC109417118::NW_021839130.1:8994473-8994973
746	LOC115259581::NW_021839130.1:24858373-24858873	LOC115259582::NW_021839130.1:24858373-24858873
747	LOC115259586::NW_021839130.1:51313945-51314445	LOC115259587::NW_021839130.1:51319404-51319904
748	LOC109411878::NW_021838449.1:709658-710158	LOC115259631::NW_021839130.1:61639496-61639996
749	LOC109403741::NW_021839130.1:8600342-8600842	LOC115259632::NW_021839130.1:9015894-9016394
750	LOC115259653::NW_021839130.1:39811489-39811989	LOC109415613::NW_021839130.1:38797173-38797673
751	LOC109399005::NW_021839130.1:30922072-30922572	LOC115259774::NW_021839130.1:34335701-34336201
752	LOC109411857::NW_021839130.1:59480860-59481360	LOC115259782::NW_021839130.1:60963279-60963779
753	LOC115259977::NW_021839163.1:125138-125638	LOC109420798::NW_021838576.1:100094770-100095270
754	LOC109423256::NW_021837545.1:520321-520821	LOC115259992::NW_021839165.1:128142-128642
755	LOC109403762::NW_021838510.1:2655259-2655759	LOC115260043::NW_021839185.1:141264-141764
756	LOC109416242::NW_021839076.1:1569978-1570478	LOC115260067::NW_021839193.1:123051-123551
757	LOC115260072::NW_021839197.1:1524594-1525094	LOC109429222::NW_021839197.1:1682423-1682923
758	LOC115260194::NW_021837069.1:1089179-1089679	LOC109433615::NW_021838798.1:77513957-77514457
759	LOC115260215::NW_021837080.1:536865-537365	LOC115256572::NW_021838798.1:74439739-74440239
760	LOC115260390::NW_021837131.1:89642-90142	LOC109400102::NW_021838610.1:2205481-2205981
761	LOC109432360::NW_021837156.1:45193043-45193543	LOC115260541::NW_021837156.1:45539979-45540479
762	LOC115260550::NW_021837156.1:54439776-54440276	LOC109431502::NW_021837156.1:57184330-57184830
763	LOC109422989::NW_021837156.1:1491206-1491706	LOC115260566::NW_021837156.1:1784954-1785454
764	LOC115260570::NW_021837156.1:2146828-2147328	LOC109422977::NW_021837156.1:2720249-2720749
765	LOC115260579::NW_021837156.1:3746963-3747463	LOC109403575::NW_021837156.1:4853937-4854437
766	LOC115260580::NW_021837156.1:3954043-3954543	LOC109422955::NW_021837156.1:5086473-5086973
767	LOC115260601::NW_021837156.1:15565096-15565596	LOC115260602::NW_021837156.1:15752795-15753295
768	LOC115260604::NW_021837156.1:16240124-16240624	LOC109400902::NW_021837156.1:24522353-24522853
769	LOC115260605::NW_021837156.1:16484657-16485157	LOC109400931::NW_021837156.1:24746078-24746578
770	LOC115260620::NW_021837156.1:20533820-20534320	LOC109422800::NW_021837156.1:21061928-21062428
771	LOC115260621::NW_021837156.1:20619737-20620237	LOC109421820::NW_021837156.1:21129891-21130391
772	LOC109422801::NW_021837156.1:20518691-20519191	LOC115260628::NW_021837156.1:21043842-21044342
773	LOC115260640::NW_021837045.1:59474263-59474763	LOC115260643::NW_021837045.1:59509854-59510354
774	LOC109424901::NW_021837156.1:34617420-34617920	LOC115260679::NW_021837156.1:40880118-40880618
775	LOC115260692::NW_021837156.1:45357022-45357522	LOC109432358::NW_021837156.1:45714300-45714800
776	LOC109431337::NW_021837156.1:49608020-49608520	LOC115260720::NW_021837156.1:51199311-51199811
777	LOC115260722::NW_021837156.1:51779183-51779683	LOC109419911::NW_021838443.1:9256984-9257484
778	LOC115260722::NW_021837156.1:51779183-51779683	LOC115254960::NW_021838687.1:6319322-6319822
779	LOC115260724::NW_021837156.1:53159956-53160456	LOC109406370::NW_021838554.1:5041762-5042262
780	LOC115260727::NW_021837156.1:54321391-54321891	LOC109427648::NW_021837156.1:57034616-57035116
781	LOC109431461::NW_021837156.1:54140842-54141342	LOC115260727::NW_021837156.1:54321391-54321891
782	LOC115260728::NW_021837156.1:55046975-55047475	LOC109427689::NW_021838184.1:1054810-1055310
783	LOC115260788::NW_021837045.1:83854213-83854713	LOC115257381::NW_021838909.1:80134439-80134939
784	LOC115260806::NW_021837166.1:85325-85825	LOC115257388::NW_021838909.1:83051680-83052180
785	LOC115260811::NW_021837168.1:1278662-1279162	LOC109402413::NW_021837168.1:700307-700807
786	LOC115260869::NW_021837190.1:1072405-1072905	LOC115260870::NW_021837190.1:1075048-1075548
787	LOC115260901::NW_021837045.1:92260173-92260673	LOC115260907::NW_021837045.1:92265299-92265799
788	LOC115260849::NW_021837045.1:88418305-88418805	LOC115260912::NW_021837045.1:93348940-93349440
789	LOC109412969::NW_021837156.1:36227778-36228278	LOC115260961::NW_021837212.1:1480617-1481117
790	LOC115260999::NW_021837234.1:257080-257580	LOC115261002::NW_021837234.1:442497-442997
791	LOC115261045::NW_021837245.1:979049-979549	LOC115255079::NW_021838687.1:32760804-32761304
792	LOC115261046::NW_021837248.1:50012-50512	LOC109421452::NW_021838153.1:117683916-117684416
793	LOC115261070::NW_021837259.1:40237-40737	LOC109431629::NW_021838443.1:6180134-6180634
794	LOC115261107::NW_021837267.1:4222705-4223205	LOC109406119::NW_021837267.1:4982328-4982828
795	LOC109406123::NW_021837267.1:4232876-4233376	LOC115261111::NW_021837267.1:4993267-4993767
796	LOC115261146::NW_021837045.1:114213712-114214212	LOC115254303::NW_021838610.1:698335-698835
797	LOC109428134::NW_021837123.1:1439377-1439877	LOC115261161::NW_021837267.1:36973663-36974163
798	LOC109401786::NW_021837267.1:4380762-4381262	LOC115261213::NW_021837267.1:5119313-5119813
799	LOC109621522::NW_021837267.1:6423343-6423843	LOC115261229::NW_021837267.1:6485796-6486296
800	LOC115261230::NW_021837267.1:6446147-6446647	LOC115261229::NW_021837267.1:6485796-6486296
801	LOC115261231::NW_021837267.1:6478689-6479189	LOC115261229::NW_021837267.1:6485796-6486296
802	LOC109621522::NW_021837267.1:6423343-6423843	LOC115261232::NW_021837267.1:6503603-6504103
803	LOC115261229::NW_021837267.1:6485796-6486296	LOC115261232::NW_021837267.1:6503603-6504103
804	LOC115261230::NW_021837267.1:6446147-6446647	LOC115261232::NW_021837267.1:6503603-6504103
805	LOC115261231::NW_021837267.1:6478689-6479189	LOC115261232::NW_021837267.1:6503603-6504103
806	LOC115261233::NW_021837267.1:6453247-6453747	LOC115261229::NW_021837267.1:6485796-6486296
807	LOC115261233::NW_021837267.1:6453247-6453747	LOC115261232::NW_021837267.1:6503603-6504103
808	LOC115261234::NW_021837267.1:6385807-6386307	LOC115261229::NW_021837267.1:6485796-6486296
809	LOC115261234::NW_021837267.1:6385807-6386307	LOC115261232::NW_021837267.1:6503603-6504103
810	LOC109417477::NW_021837267.1:6474420-6474920	LOC115261249::NW_021837267.1:6557279-6557779
811	LOC115261239::NW_021837267.1:6441912-6442412	LOC115261249::NW_021837267.1:6557279-6557779
812	LOC115261240::NW_021837267.1:6490445-6490945	LOC115261249::NW_021837267.1:6557279-6557779
813	LOC115261241::NW_021837267.1:6499349-6499849	LOC115261249::NW_021837267.1:6557279-6557779
814	LOC115261242::NW_021837267.1:6550165-6550665	LOC115261249::NW_021837267.1:6557279-6557779
815	LOC115261243::NW_021837267.1:6481552-6482052	LOC115261249::NW_021837267.1:6557279-6557779
816	LOC115261244::NW_021837267.1:6506466-6506966	LOC115261249::NW_021837267.1:6557279-6557779
817	LOC115261245::NW_021837267.1:6513565-6514065	LOC115261249::NW_021837267.1:6557279-6557779
818	LOC115261246::NW_021837267.1:6521011-6521511	LOC115261249::NW_021837267.1:6557279-6557779
819	LOC115261248::NW_021837267.1:6528113-6528613	LOC115261249::NW_021837267.1:6557279-6557779
820	LOC109417477::NW_021837267.1:6474420-6474920	LOC115261250::NW_021837267.1:6564389-6564889
821	LOC115261239::NW_021837267.1:6441912-6442412	LOC115261250::NW_021837267.1:6564389-6564889
822	LOC115261240::NW_021837267.1:6490445-6490945	LOC115261250::NW_021837267.1:6564389-6564889
823	LOC115261241::NW_021837267.1:6499349-6499849	LOC115261250::NW_021837267.1:6564389-6564889
824	LOC115261242::NW_021837267.1:6550165-6550665	LOC115261250::NW_021837267.1:6564389-6564889
825	LOC115261243::NW_021837267.1:6481552-6482052	LOC115261250::NW_021837267.1:6564389-6564889
826	LOC115261244::NW_021837267.1:6506466-6506966	LOC115261250::NW_021837267.1:6564389-6564889
827	LOC115261245::NW_021837267.1:6513565-6514065	LOC115261250::NW_021837267.1:6564389-6564889
828	LOC115261246::NW_021837267.1:6521011-6521511	LOC115261250::NW_021837267.1:6564389-6564889
829	LOC115261248::NW_021837267.1:6528113-6528613	LOC115261250::NW_021837267.1:6564389-6564889
830	LOC115261249::NW_021837267.1:6557279-6557779	LOC115261250::NW_021837267.1:6564389-6564889
831	LOC115261251::NW_021837267.1:6571483-6571983	LOC115261250::NW_021837267.1:6564389-6564889
832	LOC115261223::NW_021837267.1:6245719-6246219	LOC115261257::NW_021837267.1:6295587-6296087
833	LOC115261224::NW_021837267.1:6239984-6240484	LOC115261263::NW_021837267.1:6284868-6285368
834	LOC115261273::NW_021837267.1:6569573-6570073	LOC109401799::NW_021837267.1:6870409-6870909
835	LOC115261269::NW_021837267.1:6290930-6291430	LOC115261274::NW_021837267.1:6306271-6306771
836	LOC115261275::NW_021837267.1:6533653-6534153	LOC109401799::NW_021837267.1:6870409-6870909
837	LOC115261276::NW_021837267.1:6504557-6505057	LOC109401799::NW_021837267.1:6870409-6870909
838	LOC115261277::NW_021837267.1:6511656-6512156	LOC109401799::NW_021837267.1:6870409-6870909
839	LOC115261278::NW_021837267.1:6519102-6519602	LOC109401799::NW_021837267.1:6870409-6870909
840	LOC115261279::NW_021837267.1:6526204-6526704	LOC109401799::NW_021837267.1:6870409-6870909
841	LOC115261280::NW_021837267.1:6555370-6555870	LOC109401799::NW_021837267.1:6870409-6870909
842	LOC115261281::NW_021837267.1:6562480-6562980	LOC109401799::NW_021837267.1:6870409-6870909
843	LOC115261275::NW_021837267.1:6533653-6534153	LOC115261281::NW_021837267.1:6562480-6562980
844	LOC115261276::NW_021837267.1:6504557-6505057	LOC115261281::NW_021837267.1:6562480-6562980
845	LOC115261277::NW_021837267.1:6511656-6512156	LOC115261281::NW_021837267.1:6562480-6562980
846	LOC115261278::NW_021837267.1:6519102-6519602	LOC115261281::NW_021837267.1:6562480-6562980
847	LOC115261279::NW_021837267.1:6526204-6526704	LOC115261281::NW_021837267.1:6562480-6562980
848	LOC115261280::NW_021837267.1:6555370-6555870	LOC115261281::NW_021837267.1:6562480-6562980
849	LOC115261315::NW_021837267.1:12356635-12357135	LOC109403275::NW_021838563.1:241754-242254
850	LOC115261342::NW_021837267.1:19633402-19633902	LOC109429213::NW_021837267.1:23372890-23373390
851	LOC115261372::NW_021837267.1:24806485-24806985	LOC109398800::NW_021837267.1:28411864-28412364
852	LOC115261379::NW_021837045.1:134216346-134216846	LOC109400829::NW_021839130.1:17735976-17736476
853	LOC109398772::NW_021837267.1:25562023-25562523	LOC115261383::NW_021837267.1:29192545-29193045
854	LOC109398839::NW_021837267.1:25882811-25883311	LOC115261386::NW_021837267.1:29440475-29440975
855	LOC109409010::NW_021837267.1:32865274-32865774	LOC115261401::NW_021837267.1:33637192-33637692
856	LOC109427253::NW_021837123.1:193223-193723	LOC115261409::NW_021837267.1:34676620-34677120
857	LOC115261413::NW_021837267.1:35101028-35101528	LOC109427261::NW_021837267.1:37520643-37521143
858	LOC115261415::NW_021837267.1:35341622-35342122	LOC109427256::NW_021837267.1:37782974-37783474
859	LOC115261420::NW_021837267.1:36150897-36151397	LOC109411608::NW_021839070.1:164625-165125
860	LOC115261432::NW_021837267.1:37159886-37160386	LOC109622686::NW_021838684.1:416408-416908
861	LOC109411636::NW_021837123.1:1641212-1641712	LOC115261433::NW_021837267.1:37190646-37191146
862	LOC109427207::NW_021837267.1:39790873-39791373	LOC115261473::NW_021837267.1:44280440-44280940
863	LOC115261474::NW_021837267.1:45060796-45061296	LOC109406317::NW_021837267.1:45130227-45130727
864	LOC115261480::NW_021837267.1:45427501-45428001	LOC109406323::NW_021837267.1:46498389-46498889
865	LOC115261514::NW_021837267.1:50446797-50447297	LOC115259988::NW_021839164.1:1596179-1596679
866	LOC115261536::NW_021837267.1:54247049-54247549	LOC109404974::NW_021837267.1:54555419-54555919
867	LOC109404993::NW_021837267.1:54294534-54295034	LOC115261538::NW_021837267.1:54606782-54607282
868	LOC115261539::NW_021837267.1:54535303-54535803	LOC109416160::NW_021837379.1:1027030-1027530
869	LOC115261550::NW_021837267.1:55613442-55613942	LOC109416636::NW_021837267.1:56003871-56004371
870	LOC109432845::NW_021837267.1:53369750-53370250	LOC115261550::NW_021837267.1:55613442-55613942
871	LOC115261552::NW_021837267.1:55691547-55692047	LOC109432847::NW_021837267.1:56061549-56062049
872	LOC109416633::NW_021837267.1:55718889-55719389	LOC115261557::NW_021837267.1:56101896-56102396
873	LOC115261559::NW_021837267.1:56458505-56459005	LOC109416618::NW_021837267.1:58416298-58416798
874	LOC109409968::NW_021837091.1:58545-59045	LOC115261565::NW_021837267.1:57659432-57659932
875	LOC109432819::NW_021837267.1:55348406-55348906	LOC115261572::NW_021837267.1:58298105-58298605
876	LOC109416616::NW_021837267.1:56807384-56807884	LOC115261574::NW_021837267.1:58503871-58504371
877	LOC115261590::NW_021837267.1:6413847-6414347	LOC109415129::NW_021838965.1:2067000-2067500
878	LOC115261592::NW_021837267.1:6454201-6454701	LOC109401799::NW_021837267.1:6870409-6870909
879	LOC115261592::NW_021837267.1:6454201-6454701	LOC115261281::NW_021837267.1:6562480-6562980
880	LOC115261593::NW_021837267.1:6479643-6480143	LOC109401799::NW_021837267.1:6870409-6870909
881	LOC115261593::NW_021837267.1:6479643-6480143	LOC115261281::NW_021837267.1:6562480-6562980
882	LOC115261255::NW_021837267.1:6442347-6442847	LOC115261594::NW_021837267.1:6481987-6482487
883	LOC115261256::NW_021837267.1:6398217-6398717	LOC115261594::NW_021837267.1:6481987-6482487
884	LOC115261595::NW_021837267.1:6495653-6496153	LOC115261268::NW_021837267.1:6546470-6546970
885	LOC115261254::NW_021837267.1:6461923-6462423	LOC115261597::NW_021837267.1:6564824-6565324
886	LOC115261255::NW_021837267.1:6442347-6442847	LOC115261597::NW_021837267.1:6564824-6565324
887	LOC115261256::NW_021837267.1:6398217-6398717	LOC115261597::NW_021837267.1:6564824-6565324
888	LOC115261258::NW_021837267.1:6376129-6376629	LOC115261597::NW_021837267.1:6564824-6565324
889	LOC115261594::NW_021837267.1:6481987-6482487	LOC115261597::NW_021837267.1:6564824-6565324
890	LOC115261757::NW_021837294.1:67360-67860	LOC109422596::NW_021838576.1:1418549-1419049
891	LOC115261814::NW_021837045.1:183860338-183860838	LOC115260776::NW_021837156.1:19649389-19649889
892	LOC115261816::NW_021837312.1:236956-237456	LOC109414797::NW_021838600.1:119304-119804
893	LOC115261819::NW_021837045.1:19639443-19639943	LOC109413475::NW_021837256.1:1258033-1258533
894	LOC115261823::NW_021837045.1:187840138-187840638	LOC109402861::NW_021839124.1:19748-20248
895	LOC115261851::NW_021837334.1:1062687-1063187	LOC109417639::NW_021838687.1:5062086-5062586
896	LOC115262101::NW_021837378.1:9344682-9345182	LOC109429599::NW_021838031.1:966122-966622
897	LOC109406528::NW_021837378.1:1799004-1799504	LOC115262112::NW_021837378.1:14346451-14346951
898	LOC115262171::NW_021837378.1:41073729-41074229	LOC115262170::NW_021837378.1:41084091-41084591
899	LOC115262185::NW_021837378.1:47068317-47068817	LOC115262189::NW_021837378.1:47664200-47664700
900	LOC109419136::NW_021837045.1:22185567-22186067	LOC115262190::NW_021837045.1:24816383-24816883
901	LOC115262191::NW_021837378.1:49384488-49384988	LOC109411217::NW_021837378.1:49819745-49820245
902	LOC115262192::NW_021837378.1:49415088-49415588	LOC109411218::NW_021837378.1:49841445-49841945
903	LOC109411225::NW_021837378.1:49664485-49664985	LOC115262203::NW_021837378.1:50111409-50111909
904	LOC115262291::NW_021837390.1:715370-715870	LOC109428007::NW_021838605.1:395351-395851
905	LOC115262292::NW_021837390.1:1445338-1445838	LOC109427971::NW_021838707.1:133463-133963
906	LOC115262467::NW_021837467.1:736519-737019	LOC109427761::NW_021838493.1:470822-471322
907	LOC115262468::NW_021837467.1:756167-756667	LOC109427750::NW_021838493.1:570383-570883
908	LOC115262469::NW_021837467.1:821176-821676	LOC109427772::NW_021838493.1:629826-630326
909	LOC115262495::NW_021837478.1:353882-354382	LOC115257621::NW_021838909.1:25661927-25662427
910	LOC115262501::NW_021837478.1:426187-426687	LOC115257707::NW_021838909.1:25714401-25714901
911	LOC115262504::NW_021837478.1:367297-367797	LOC115257617::NW_021838909.1:25671022-25671522
912	LOC115262585::NW_021837489.1:29303709-29304209	LOC109426919::NW_021837489.1:30742366-30742866
913	LOC109623308::NW_021837489.1:32432128-32432628	LOC115262594::NW_021837489.1:33666383-33666883
914	LOC109412062::NW_021837489.1:582909-583409	LOC115262627::NW_021837489.1:2054572-2055072
915	LOC115262647::NW_021837489.1:7531940-7532440	LOC109622815::NW_021839020.1:14162714-14163214
916	LOC115262664::NW_021837489.1:18321800-18322300	LOC109404291::NW_021837489.1:18862362-18862862
917	LOC115262666::NW_021837489.1:20772516-20773016	LOC115262674::NW_021837489.1:24767998-24768498
918	LOC109404246::NW_021837489.1:19875092-19875592	LOC115262675::NW_021837489.1:23839109-23839609
919	LOC115262690::NW_021837489.1:30732914-30733414	LOC115254963::NW_021838687.1:7844712-7845212
920	LOC109623382::NW_021837489.1:32169347-32169847	LOC115262704::NW_021837489.1:33371826-33372326
921	LOC109623316::NW_021837489.1:32247514-32248014	LOC115262705::NW_021837489.1:33448804-33449304
922	LOC115262721::NW_021837489.1:35887340-35887840	LOC109401245::NW_021837489.1:39115503-39116003
923	LOC115262731::NW_021837489.1:37339508-37340008	LOC109401265::NW_021837489.1:40524755-40525255
924	LOC109401306::NW_021837489.1:36667760-36668260	LOC115262744::NW_021837489.1:39834460-39834960
925	LOC115262749::NW_021837489.1:41374914-41375414	LOC109407900::NW_021837489.1:43886575-43887075
926	LOC115262791::NW_021837489.1:11423114-11423614	LOC115255657::NW_021838688.1:539264-539764
927	LOC115262817::NW_021837489.1:35488287-35488787	LOC115262818::NW_021837489.1:35492983-35493483
928	LOC115262949::NW_021837545.1:448156-448656	LOC109423372::NW_021839165.1:35495-35995
929	LOC109418397::NW_021837045.1:11523075-11523575	LOC115262950::NW_021837045.1:14079496-14079996
930	LOC115263032::NW_021837578.1:1061090-1061590	LOC109417534::NW_021837578.1:1099538-1100038
931	LOC109413653::NW_021837867.1:14193-14693	LOC115263074::NW_021837600.1:6960811-6961311
932	LOC115263074::NW_021837600.1:6960811-6961311	LOC109426889::NW_021838643.1:5870206-5870706
933	LOC115263088::NW_021837600.1:20057779-20058279	LOC109430778::NW_021837600.1:22810113-22810613
934	LOC109430764::NW_021837600.1:20092518-20093018	LOC115263094::NW_021837600.1:22861099-22861599
935	LOC115263111::NW_021837600.1:36108101-36108601	LOC109416608::NW_021838682.1:125535-126035
936	LOC115263165::NW_021837600.1:8165743-8166243	LOC115255536::NW_021838687.1:12422801-12423301
937	LOC115263187::NW_021837600.1:13163991-13164491	LOC109430905::NW_021837600.1:14646451-14646951
938	LOC115263190::NW_021837600.1:14086427-14086927	LOC109430839::NW_021837600.1:15104763-15105263
939	LOC115263196::NW_021837600.1:15975952-15976452	LOC109424155::NW_021837600.1:16534648-16535148
940	LOC109418450::NW_021837045.1:16681608-16682108	LOC115263207::NW_021837045.1:17080208-17080708
941	LOC109430818::NW_021837600.1:16162928-16163428	LOC115263210::NW_021837600.1:16720774-16721274
942	LOC115263215::NW_021837600.1:18133676-18134176	LOC109430839::NW_021837600.1:15104763-15105263
943	LOC115263233::NW_021837600.1:20271393-20271893	LOC109430802::NW_021837600.1:23057806-23058306
944	LOC109430804::NW_021837600.1:20154951-20155451	LOC115263238::NW_021837600.1:22942221-22942721
945	LOC109430805::NW_021837600.1:20156609-20157109	LOC115263239::NW_021837600.1:22943880-22944380
946	LOC109421491::NW_021837045.1:173105020-173105520	LOC115263245::NW_021837600.1:25820601-25821101
947	LOC109415948::NW_021837600.1:26315432-26315932	LOC115263250::NW_021837600.1:27742589-27743089
948	LOC115263132::NW_021837600.1:30989274-30989774	LOC115263279::NW_021837600.1:34825835-34826335
949	LOC115263264::NW_021837600.1:32859266-32859766	LOC115263299::NW_021837600.1:39014102-39014602
950	LOC109403802::NW_021837600.1:33032127-33032627	LOC115263301::NW_021837600.1:39156336-39156836
951	LOC115263319::NW_021837600.1:46617713-46618213	LOC109415869::NW_021838810.1:1586906-1587406
952	LOC115263330::NW_021837600.1:2182119-2182619	LOC109418596::NW_021838153.1:17907-18407
953	LOC115263343::NW_021837600.1:9279126-9279626	LOC109397614::NW_021839166.1:109668-110168
954	LOC109430912::NW_021837600.1:9767385-9767885	LOC115263346::NW_021837600.1:10117593-10118093
955	LOC109430775::NW_021837600.1:20033744-20034244	LOC115263362::NW_021837600.1:22776956-22777456
956	LOC115263429::NW_021837623.1:1126099-1126599	LOC109399190::NW_021838153.1:96828403-96828903
957	LOC109400233::NW_021838153.1:28043-28543	LOC115263569::NW_021837689.1:951723-952223
958	LOC115263569::NW_021837689.1:951723-952223	LOC115257678::NW_021838909.1:77457054-77457554
959	LOC109397255::NW_021837711.1:2147347-2147847	LOC115263682::NW_021837711.1:2979996-2980496
960	LOC109423228::NW_021839187.1:38242-38742	LOC115263682::NW_021837711.1:2979996-2980496
961	LOC115263700::NW_021837045.1:22696048-22696548	LOC115262218::NW_021837045.1:24824375-24824875
962	LOC109425434::NW_021837379.1:119734-120234	LOC115263718::NW_021837711.1:16567488-16567988
963	LOC115263710::NW_021837711.1:13526673-13527173	LOC115263719::NW_021837711.1:16631131-16631631
964	LOC115263732::NW_021837711.1:20913377-20913877	LOC115254915::NW_021838687.1:80490336-80490836
965	LOC115263756::NW_021837711.1:31680749-31681249	LOC109401747::NW_021838153.1:60102012-60102512
966	LOC115263770::NW_021837711.1:39233381-39233881	LOC109413260::NW_021838278.1:814000-814500
967	LOC115262913::NW_021837523.1:1518684-1519184	LOC115263786::NW_021837711.1:5710039-5710539
968	LOC115263801::NW_021837711.1:15229532-15230032	LOC109422451::NW_021838754.1:57794-58294
969	LOC115263804::NW_021837711.1:15627862-15628362	LOC115255836::NW_021838715.1:73133-73633
970	LOC115263805::NW_021837711.1:15635625-15636125	LOC109621764::NW_021838715.1:80900-81400
971	LOC115263837::NW_021837711.1:15627212-15627712	LOC109415278::NW_021838715.1:72483-72983
972	LOC115263870::NW_021837045.1:26723032-26723532	LOC109415967::NW_021837045.1:27369729-27370229
973	LOC109418409::NW_021837734.1:567897-568397	LOC115263947::NW_021837734.1:727902-728402
974	LOC115263964::NW_021837747.1:6878-7378	LOC109424468::NW_021839208.1:956499-956999
975	LOC115263987::NW_021837767.1:65437-65937	LOC109427898::NW_021837767.1:844582-845082
976	LOC109402459::NW_021837822.1:2471426-2471926	LOC115264100::NW_021837822.1:3516167-3516667
977	LOC115264126::NW_021837822.1:7777259-7777759	LOC109400262::NW_021837822.1:8308984-8309484
978	LOC115264164::NW_021837822.1:13589968-13590468	LOC109411039::NW_021838555.1:130182-130682
979	LOC115264188::NW_021837045.1:30327618-30328118	LOC109419239::NW_021837045.1:30560655-30561155
980	LOC109416068::NW_021837822.1:24092128-24092628	LOC115264191::NW_021837822.1:24736084-24736584
981	LOC109424852::NW_021837822.1:30165293-30165793	LOC115264212::NW_021837822.1:31434900-31435400
982	LOC115264218::NW_021837822.1:33675833-33676333	LOC109424807::NW_021837976.1:465150-465650
983	LOC115264248::NW_021837822.1:35491724-35492224	LOC115264249::NW_021837822.1:35686101-35686601
984	LOC115264252::NW_021837822.1:35384068-35384568	LOC109413361::NW_021837822.1:35598893-35599393
985	LOC115264077::NW_021837822.1:35333753-35334253	LOC115264255::NW_021837822.1:35732860-35733360
986	LOC109413407::NW_021837822.1:35595982-35596482	LOC115264259::NW_021837822.1:35689055-35689555
987	LOC115264318::NW_021837822.1:20877363-20877863	LOC115258054::NW_021838923.1:97322-97822
988	LOC115264392::NW_021837834.1:636078-636578	LOC109432711::NW_021838465.1:8605336-8605836
989	LOC115264397::NW_021837834.1:58545-59045	LOC115255483::NW_021838687.1:66064428-66064928
990	LOC115264416::NW_021837845.1:7327-7827	LOC115256584::NW_021838798.1:75326738-75327238
991	LOC115257931::NW_021837046.1:40378269-40378769	LOC115264431::NW_021837045.1:34954875-34955375
992	LOC115264467::NW_021837045.1:36097194-36097694	LOC109397643::NW_021838518.1:511231-511731
993	LOC115264515::NW_021837931.1:30374823-30375323	LOC115264516::NW_021837931.1:30444611-30445111
994	LOC109420152::NW_021837931.1:18058363-18058863	LOC115264609::NW_021837931.1:18509333-18509833
995	LOC109420123::NW_021837931.1:18262308-18262808	LOC115264616::NW_021837931.1:18704005-18704505
996	LOC115264640::NW_021837931.1:21557467-21557967	LOC109415896::NW_021839150.1:25212-25712
997	LOC109429484::NW_021837045.1:38780184-38780684	LOC115264647::NW_021837045.1:39855406-39855906
998	LOC109412634::NW_021837931.1:25297263-25297763	LOC115264659::NW_021837931.1:25328723-25329223
999	LOC115264666::NW_021837931.1:27440574-27441074	LOC109401553::NW_021837931.1:33460016-33460516
1000	LOC109401533::NW_021837931.1:27283404-27283904	LOC115264689::NW_021837931.1:33323145-33323645
1001	LOC115264696::NW_021837931.1:35948030-35948530	LOC109422261::NW_021839153.1:1382975-1383475
1002	LOC115264719::NW_021837931.1:12368674-12369174	LOC115259745::NW_021839130.1:12188435-12188935
1003	LOC115253860::NW_021837965.1:953310-953810	LOC115264836::NW_021837965.1:1037927-1038427
1004	LOC115264857::NW_021837987.1:1091323-1091823	LOC109427513::NW_021838798.1:46806946-46807446
1005	LOC109403728::NW_021837267.1:7857689-7858189	LOC115264884::NW_021838009.1:906071-906571
1006	LOC115261296::NW_021837267.1:8435888-8436388	LOC115264884::NW_021838009.1:906071-906571
1007	LOC109429594::NW_021837378.1:8472817-8473317	LOC115264896::NW_021838031.1:88607-89107
1008	LOC109408545::NW_021837378.1:8477363-8477863	LOC115264897::NW_021838031.1:97549-98049
1009	LOC115264926::NW_021838042.1:13443888-13444388	LOC109404233::NW_021838042.1:17304676-17305176
1010	LOC109402890::NW_021837045.1:46071437-46071937	LOC115264930::NW_021837045.1:47447958-47448458
1011	LOC109431761::NW_021837045.1:46480746-46481246	LOC115264930::NW_021837045.1:47447958-47448458
1012	LOC115264933::NW_021838042.1:16763640-16764140	LOC109414031::NW_021838383.1:179650-180150
1013	LOC115264925::NW_021838042.1:12867468-12867968	LOC115264933::NW_021838042.1:16763640-16764140
1014	LOC109404215::NW_021838042.1:14938245-14938745	LOC115264937::NW_021838042.1:18735636-18736136
1015	LOC109621934::NW_021838042.1:15075164-15075664	LOC115264939::NW_021838042.1:18930611-18931111
1016	LOC115264991::NW_021838042.1:2562630-2563130	LOC115259319::NW_021839097.1:894774-895274
1017	LOC115265004::NW_021838042.1:17719893-17720393	LOC115259745::NW_021839130.1:12188435-12188935
1018	LOC109425728::NW_021837545.1:522284-522784	LOC115265017::NW_021838043.1:448220-448720
1019	LOC115265065::NW_021838076.1:648156-648656	LOC115263786::NW_021837711.1:5710039-5710539
1020	LOC115265071::NW_021838076.1:1043951-1044451	LOC109403110::NW_021838576.1:91779478-91779978
1021	LOC115265072::NW_021838076.1:1045226-1045726	LOC109403093::NW_021838576.1:91780680-91781180
1022	LOC115265099::NW_021838109.1:271896-272396	LOC109398688::NW_021838109.1:566444-566944
1023	LOC115265120::NW_021838142.1:190639-191139	LOC109422632::NW_021838599.1:584257-584757
1024	LOC115260638::NW_021837045.1:59363657-59364157	LOC115265140::NW_021838153.1:46388706-46389206
1025	LOC115263152::NW_021837600.1:2182755-2183255	LOC115265236::NW_021838153.1:18543-19043
1026	LOC115265247::NW_021838153.1:3810728-3811228	LOC109426821::NW_021838153.1:5245820-5246320
1027	LOC115264431::NW_021837045.1:34954875-34955375	LOC115265262::NW_021838153.1:13253422-13253922
1028	LOC115265268::NW_021838153.1:17187378-17187878	LOC109426668::NW_021838427.1:170890-171390
1029	LOC109426672::NW_021838153.1:16313123-16313623	LOC115265276::NW_021838153.1:18690723-18691223
1030	LOC109411811::NW_021838153.1:51673382-51673882	LOC115265357::NW_021838153.1:53240298-53240798
1031	LOC109409789::NW_021838153.1:55075585-55076085	LOC115265375::NW_021838153.1:56460678-56461178
1032	LOC115265434::NW_021837045.1:59473472-59473972	LOC109402257::NW_021838366.1:540437-540937
1033	LOC115265435::NW_021837045.1:59509063-59509563	LOC109402257::NW_021838366.1:540437-540937
1034	LOC115265434::NW_021837045.1:59473472-59473972	LOC115265435::NW_021837045.1:59509063-59509563
1035	LOC115265498::NW_021838153.1:110928041-110928541	LOC115256601::NW_021838798.1:48745379-48745879
1036	LOC115265505::NW_021837045.1:67385091-67385591	LOC115257772::NW_021838909.1:91359827-91360327
1037	LOC115265513::NW_021838153.1:117764037-117764537	LOC109432552::NW_021838153.1:124782605-124783105
1038	LOC115265515::NW_021838153.1:117924157-117924657	LOC109432548::NW_021838153.1:124940288-124940788
1039	LOC109421431::NW_021838153.1:118139705-118140205	LOC115265560::NW_021838153.1:125123667-125124167
1040	LOC109432525::NW_021838153.1:118310203-118310703	LOC115265563::NW_021838153.1:125305537-125306037
1041	LOC109432544::NW_021838153.1:118979195-118979695	LOC115265565::NW_021838153.1:125951461-125951961
1042	LOC115261182::NW_021837267.1:50594713-50595213	LOC115265579::NW_021838153.1:131662177-131662677
1043	LOC115265601::NW_021838153.1:148497137-148497637	LOC109404800::NW_021838153.1:150931563-150932063
1044	LOC115265604::NW_021838153.1:149796705-149797205	LOC109623251::NW_021838424.1:222314-222814
1045	LOC109430988::NW_021838153.1:156231853-156232353	LOC115265634::NW_021838153.1:157744167-157744667
1046	LOC115265643::NW_021838153.1:161175850-161176350	LOC115257026::NW_021838821.1:1272878-1273378
1047	LOC115265693::NW_021838153.1:17663864-17664364	LOC109426626::NW_021838153.1:18828442-18828942
1048	LOC115265694::NW_021838153.1:17669172-17669672	LOC115265698::NW_021838153.1:18833748-18834248
1049	LOC115265695::NW_021838153.1:17681043-17681543	LOC115265699::NW_021838153.1:18852259-18852759
1050	LOC109426625::NW_021838153.1:17691550-17692050	LOC115265700::NW_021838153.1:18862600-18863100
1051	LOC115265812::NW_021838153.1:120621277-120621777	LOC109421221::NW_021839087.1:82246-82746
1052	LOC115266038::NW_021838154.1:2154817-2155317	LOC109416415::NW_021838608.1:135227-135727
1053	LOC115266049::NW_021838154.1:5347997-5348497	LOC109431912::NW_021838154.1:7321642-7322142
1054	LOC115266079::NW_021838154.1:13102716-13103216	LOC115256668::NW_021838798.1:68319468-68319968
1055	LOC109422540::NW_021837987.1:577985-578485	LOC115266099::NW_021838154.1:17979707-17980207
1056	LOC109406715::NW_021837316.1:25325-25825	LOC115266121::NW_021838154.1:1306787-1307287
1057	LOC109427117::NW_021837045.1:88042450-88042950	LOC115266261::NW_021837045.1:89978501-89979001
1058	LOC115266115::NW_021837045.1:88250825-88251325	LOC115266272::NW_021837045.1:90195810-90196310
1059	LOC115266293::NW_021838233.1:3008770-3009270	LOC109414446::NW_021838233.1:3347376-3347876
1060	LOC115266296::NW_021838233.1:3272684-3273184	LOC109621322::NW_021838233.1:4147957-4148457
1061	LOC115266300::NW_021838233.1:3929017-3929517	LOC109622261::NW_021838233.1:4713524-4714024
1062	LOC115266290::NW_021838233.1:2846443-2846943	LOC115266301::NW_021838233.1:4033286-4033786
1063	LOC109621250::NW_021838233.1:5877471-5877971	LOC115266328::NW_021838233.1:8248726-8249226
1064	LOC109414457::NW_021838233.1:5940945-5941445	LOC115266329::NW_021838233.1:8322815-8323315
1065	LOC115266340::NW_021838233.1:11118079-11118579	LOC109397797::NW_021837867.1:88696-89196
1066	LOC109428229::NW_021837046.1:49075770-49076270	LOC115266356::NW_021838233.1:14393900-14394400
1067	LOC109428219::NW_021837767.1:721409-721909	LOC115266358::NW_021838233.1:14815456-14815956
1068	LOC115266359::NW_021838233.1:14912001-14912501	LOC109418804::NW_021838576.1:100012251-100012751
1069	LOC115266327::NW_021838233.1:8187871-8188371	LOC115266361::NW_021838233.1:15617977-15618477
1070	LOC115266369::NW_021838233.1:17245423-17245923	LOC109427926::NW_021838233.1:17554802-17555302
1071	LOC115266382::NW_021837045.1:87720580-87721080	LOC115259495::NW_021839130.1:16183120-16183620
1072	LOC109397797::NW_021837867.1:88696-89196	LOC115266389::NW_021838233.1:21897194-21897694
1073	LOC115266476::NW_021838278.1:1003681-1004181	LOC115266474::NW_021838278.1:1003681-1004181
1074	LOC115254173::NW_021838310.1:379306-379806	LOC115266498::NW_021838310.1:416981-417481
1075	LOC109417111::NW_021838332.1:668261-668761	LOC115266522::NW_021838332.1:697228-697728
1076	LOC115266549::NW_021837045.1:99735663-99736163	LOC109401328::NW_021837045.1:99923600-99924100
1077	LOC109411115::NW_021838343.1:2090374-2090874	LOC115266551::NW_021838343.1:2588169-2588669
1078	LOC109408200::NW_021837122.1:89258-89758	LOC115266567::NW_021838343.1:6351776-6352276
1079	LOC115266573::NW_021838343.1:7058130-7058630	LOC109411158::NW_021838343.1:11137486-11137986
1080	LOC115266580::NW_021838343.1:8995128-8995628	LOC109408189::NW_021839191.1:84108-84608
1081	LOC115266587::NW_021838343.1:10570034-10570534	LOC109433157::NW_021838798.1:6441644-6442144
1082	LOC109416502::NW_021838343.1:13421894-13422394	LOC115266601::NW_021838343.1:14236373-14236873
1083	LOC109416500::NW_021838343.1:12039566-12040066	LOC115266603::NW_021838343.1:13989664-13990164
1084	LOC115266623::NW_021838343.1:18843639-18844139	LOC115254827::NW_021838676.1:60412-60912
1085	LOC109416689::NW_021838343.1:12808534-12809034	LOC115266655::NW_021838343.1:13274626-13275126
1086	LOC115266664::NW_021838343.1:20267317-20267817	LOC115254705::NW_021838655.1:149610-150110
1087	LOC109416489::NW_021838343.1:14823042-14823542	LOC115266688::NW_021838343.1:14832184-14832684
1088	LOC109422516::NW_021837179.1:1826519-1827019	LOC115266694::NW_021838343.1:16598935-16599435
1089	LOC115266747::NW_021838384.1:240611-241111	LOC109417537::NW_021838390.1:235677-236177
1090	LOC115266750::NW_021838385.1:342772-343272	LOC109412528::NW_021838576.1:102279236-102279736
1091	LOC115266751::NW_021838385.1:554989-555489	LOC109420842::NW_021838576.1:102537289-102537789
1092	LOC115261556::NW_021837045.1:162807346-162807846	LOC115266783::NW_021838388.1:10384678-10385178
1093	LOC109430135::NW_021838388.1:10966862-10967362	LOC115266796::NW_021838388.1:11480020-11480520
1094	LOC115265394::NW_021838153.1:68323707-68324207	LOC115266801::NW_021838388.1:11729354-11729854
1095	LOC115266842::NW_021838391.1:608936-609436	LOC109408801::NW_021838465.1:9077038-9077538
1096	LOC109621396::NW_021838054.1:47575-48075	LOC115266862::NW_021838395.1:512529-513029
1097	LOC109410846::NW_021837723.1:1119605-1120105	LOC115266865::NW_021838395.1:625808-626308
1098	LOC115266878::NW_021838396.1:471518-472018	LOC115266879::NW_021838396.1:463431-463931
1099	LOC115266885::NW_021838396.1:455344-455844	LOC115266879::NW_021838396.1:463431-463931
1100	LOC115266912::NW_021838399.1:335450-335950	LOC109408115::NW_021838399.1:2899794-2900294
1101	LOC115266939::NW_021838399.1:11039356-11039856	LOC109425119::NW_021838399.1:12786675-12787175
1102	LOC115258573::NW_021837046.1:51716584-51717084	LOC115266960::NW_021838399.1:8776971-8777471
1103	LOC115266957::NW_021838399.1:7474872-7475372	LOC115266965::NW_021838399.1:11352004-11352504
1104	LOC115266977::NW_021838401.1:967059-967559	LOC109621825::NW_021838576.1:23305935-23306435
1105	LOC115266987::NW_021838404.1:93987-94487	LOC109427537::NW_021838687.1:3043020-3043520
1106	LOC115267077::NW_021838410.1:11075309-11075809	LOC109399946::NW_021838410.1:11849608-11850108
1107	LOC115267130::NW_021837045.1:116462310-116462810	LOC109425563::NW_021837045.1:117161203-117161703
1108	LOC109411254::NW_021837045.1:115987485-115987985	LOC115267156::NW_021837045.1:116388506-116389006
1109	LOC115267200::NW_021838421.1:1248070-1248570	LOC109432247::NW_021838465.1:30932152-30932652
1110	LOC115267261::NW_021838423.1:639147-639647	LOC115267262::NW_021838423.1:857447-857947
1111	LOC109421032::NW_021837711.1:32532696-32533196	LOC115267334::NW_021838432.1:6545836-6546336
1112	LOC115267338::NW_021838432.1:7362262-7362762	LOC115257590::NW_021838909.1:9634504-9635004
1113	LOC115267361::NW_021838432.1:8921291-8921791	LOC115267371::NW_021838432.1:11885505-11886005
1114	LOC115267387::NW_021838432.1:8242461-8242961	LOC109429993::NW_021838432.1:9786144-9786644
1115	LOC109416385::NW_021838432.1:8306151-8306651	LOC115267390::NW_021838432.1:9864922-9865422
1116	LOC115267456::NW_021838442.1:53117-53617	LOC109421136::NW_021838465.1:58608652-58609152
1117	LOC115264714::NW_021837931.1:4003484-4003984	LOC115267465::NW_021838443.1:1438568-1439068
1118	LOC115267468::NW_021838443.1:4448626-4449126	LOC109408146::NW_021839153.1:1227258-1227758
1119	LOC109397949::NW_021837301.1:813411-813911	LOC115267489::NW_021838443.1:2862869-2863369
1120	LOC115267494::NW_021838443.1:5186740-5187240	LOC109430934::NW_021839086.1:817899-818399
1121	LOC115267476::NW_021838443.1:60910-61410	LOC115267500::NW_021838443.1:9347133-9347633
1122	LOC115267511::NW_021838443.1:3222816-3223316	LOC115258698::NW_021839020.1:7422978-7423478
1123	LOC115267516::NW_021838443.1:5155731-5156231	LOC115254031::NW_021839086.1:789025-789525
1124	LOC109397962::NW_021838443.1:176682-177182	LOC115267521::NW_021838443.1:9473778-9474278
1125	LOC115262125::NW_021837378.1:17802165-17802665	LOC115267561::NW_021838452.1:368526-369026
1126	LOC115267599::NW_021838454.1:5133134-5133634	LOC115258206::NW_021838959.1:9403-9903
1127	LOC115267609::NW_021838454.1:6993189-6993689	LOC109431688::NW_021838454.1:9185604-9186104
1128	LOC109426171::NW_021838454.1:5904739-5905239	LOC115267613::NW_021838454.1:7700587-7701087
1129	LOC109426095::NW_021838454.1:6159113-6159613	LOC115267615::NW_021838454.1:7953668-7954168
1130	LOC109401962::NW_021838465.1:1233757-1234257	LOC115267706::NW_021838465.1:2250463-2250963
1131	LOC115261199::NW_021837267.1:1172351-1172851	LOC115267724::NW_021838465.1:8675329-8675829
1132	LOC115267733::NW_021838465.1:10750166-10750666	LOC109428592::NW_021838510.1:7381805-7382305
1133	LOC109408741::NW_021838465.1:6855033-6855533	LOC115267735::NW_021838465.1:10780403-10780903
1134	LOC109414909::NW_021838465.1:6422525-6423025	LOC115267748::NW_021838465.1:15818948-15819448
1135	LOC109408711::NW_021838465.1:14029014-14029514	LOC115267751::NW_021838465.1:17889760-17890260
1136	LOC109409855::NW_021838465.1:27204697-27205197	LOC115267792::NW_021838465.1:29841818-29842318
1137	LOC109397010::NW_021838461.1:493080-493580	LOC115267809::NW_021838465.1:36060409-36060909
1138	LOC115267829::NW_021838465.1:44781342-44781842	LOC109399622::NW_021838465.1:45263342-45263842
1139	LOC109400795::NW_021838465.1:45310998-45311498	LOC115267837::NW_021838465.1:46571488-46571988
1140	LOC115267847::NW_021838465.1:50782340-50782840	LOC109402416::NW_021838887.1:2202765-2203265
1141	LOC115267848::NW_021838465.1:51206686-51207186	LOC115267849::NW_021838465.1:51650613-51651113
1142	LOC115267859::NW_021838465.1:56869246-56869746	LOC109410565::NW_021838465.1:57917969-57918469
1143	LOC115267860::NW_021838465.1:56963222-56963722	LOC109421151::NW_021838465.1:58027851-58028351
1144	LOC115267865::NW_021838465.1:61340505-61341005	LOC109414407::NW_021838465.1:61927041-61927541
1145	LOC109426534::NW_021838465.1:68264003-68264503	LOC115267881::NW_021838465.1:73360097-73360597
1146	LOC109409194::NW_021837378.1:49795859-49796359	LOC115267969::NW_021838465.1:103811098-103811598
1147	LOC115267973::NW_021838465.1:105361706-105362206	LOC115267976::NW_021838465.1:105970401-105970901
1148	LOC109410676::NW_021838465.1:105348294-105348794	LOC115267978::NW_021838465.1:105956184-105956684
1149	LOC115263792::NW_021837711.1:11584815-11585315	LOC115267982::NW_021838465.1:4383031-4383531
1150	LOC115267990::NW_021837045.1:107577707-107578207	LOC109424018::NW_021837045.1:108097350-108097850
1151	LOC115268014::NW_021838465.1:114596999-114597499	LOC109426059::NW_021838465.1:115949720-115950220
1152	LOC109426054::NW_021838465.1:116973165-116973665	LOC115268023::NW_021838465.1:118059459-118059959
1153	LOC115260698::NW_021837156.1:48351885-48352385	LOC115268026::NW_021838465.1:118528732-118529232
1154	LOC115268031::NW_021838465.1:119850374-119850874	LOC109426019::NW_021838465.1:123693798-123694298
1155	LOC109426018::NW_021838465.1:119865054-119865554	LOC115268051::NW_021838465.1:123700902-123701402
1156	LOC109426010::NW_021838465.1:120459970-120460470	LOC115268054::NW_021838465.1:124286163-124286663
1157	LOC109425973::NW_021838465.1:126013618-126014118	LOC115268086::NW_021838465.1:135029980-135030480
1158	LOC109410591::NW_021838465.1:61308233-61308733	LOC115268149::NW_021838465.1:61881710-61882210
1159	LOC115262195::NW_021837378.1:49791773-49792273	LOC115268186::NW_021838465.1:103807011-103807511
1160	LOC115268243::NW_021837045.1:142314525-142315025	LOC109409567::NW_021837045.1:142557415-142557915
1161	LOC109430621::NW_021837045.1:88677116-88677616	LOC115268271::NW_021838465.1:39787067-39787567
1162	LOC109399624::NW_021838465.1:44778790-44779290	LOC115268277::NW_021838465.1:45261049-45261549
1163	LOC109400801::NW_021838465.1:45216441-45216941	LOC115268278::NW_021838465.1:46487452-46487952
1164	LOC109410588::NW_021838153.1:665807-666307	LOC115268308::NW_021838465.1:61165565-61166065
1165	LOC109621439::NW_021837204.1:75536-76036	LOC115268350::NW_021838465.1:108623300-108623800
1166	LOC109400596::NW_021837045.1:50676714-50677214	LOC115268359::NW_021838465.1:110574273-110574773
1167	LOC115268394::NW_021838465.1:129771922-129772422	LOC109425886::NW_021838465.1:133204650-133205150
1168	LOC115268456::NW_021838466.1:1565535-1566035	LOC109407939::NW_021839186.1:1741313-1741813
1169	LOC115268493::NW_021838466.1:6217359-6217859	LOC109410420::NW_021838466.1:9224044-9224544
1170	LOC115268497::NW_021838466.1:6748204-6748704	LOC109417989::NW_021838466.1:7287171-7287671
1171	LOC115268498::NW_021838466.1:7069665-7070165	LOC109417986::NW_021839133.1:49397-49897
1172	LOC115268502::NW_021838466.1:7755115-7755615	LOC109415089::NW_021838466.1:7763654-7764154
1173	LOC115268547::NW_021838466.1:9972506-9973006	LOC109422072::NW_021838798.1:7649826-7650326
1174	LOC115268609::NW_021838477.1:5884319-5884819	LOC109402493::NW_021838477.1:7258295-7258795
1175	LOC115263778::NW_021837045.1:22875390-22875890	LOC115268620::NW_021838477.1:7741960-7742460
1176	LOC115265466::NW_021837045.1:25004256-25004756	LOC115268620::NW_021838477.1:7741960-7742460
1177	LOC115268623::NW_021838477.1:5897722-5898222	LOC109402479::NW_021838477.1:7276749-7277249
1178	LOC115268720::NW_021838488.1:4092622-4093122	LOC109418222::NW_021838488.1:5003206-5003706
1179	LOC109427995::NW_021838488.1:4266293-4266793	LOC115268733::NW_021838488.1:5175468-5175968
1180	LOC115268756::NW_021837045.1:148708620-148709120	LOC109399355::NW_021837700.1:84395-84895
1181	LOC109427674::NW_021837467.1:557195-557695	LOC115268763::NW_021838493.1:303446-303946
1182	LOC109427703::NW_021837467.1:661685-662185	LOC115268764::NW_021838493.1:415343-415843
1183	LOC115268782::NW_021838495.1:42151-42651	LOC109407094::NW_021838987.1:1296147-1296647
1184	LOC115268801::NW_021837045.1:149360422-149360922	LOC109423289::NW_021838576.1:67343307-67343807
1185	LOC115268850::NW_021838499.1:148383-148883	LOC109425258::NW_021839130.1:57321909-57322409
1186	LOC115268886::NW_021838504.1:383761-384261	LOC109426333::NW_021838932.1:1691425-1691925
1187	LOC109403769::NW_021837600.1:49095960-49096460	LOC115268895::NW_021838506.1:93417-93917
1188	LOC115268929::NW_021838510.1:19529-20029	LOC115268931::NW_021838510.1:524776-525276
1189	LOC115268934::NW_021838510.1:1873127-1873627	LOC109419441::NW_021838510.1:1962492-1962992
1190	LOC115268993::NW_021838515.1:472999-473499	LOC115256160::NW_021838765.1:1503001-1503501
1191	LOC115268995::NW_021838516.1:474878-475378	LOC109398842::NW_021839130.1:19029581-19030081
1192	LOC115269025::NW_021838518.1:453249-453749	LOC115264714::NW_021837931.1:4003484-4003984
1193	LOC115269054::NW_021838521.1:1314737-1315237	LOC109422144::NW_021838521.1:6827591-6828091
1194	LOC115269067::NW_021838521.1:2452632-2453132	LOC109410330::NW_021838927.1:87096-87596
1195	LOC109432607::NW_021838521.1:1477550-1478050	LOC115269098::NW_021838521.1:6740198-6740698
1196	LOC109422147::NW_021838521.1:1521928-1522428	LOC115269102::NW_021838521.1:6763974-6764474
1197	LOC115269107::NW_021838521.1:1961797-1962297	LOC109404727::NW_021838521.1:2239018-2239518
1198	LOC115269146::NW_021838526.1:362241-362741	LOC115256801::NW_021838798.1:70371240-70371740
1199	LOC115269155::NW_021838528.1:411477-411977	LOC109410166::NW_021838798.1:22494140-22494640
1200	LOC115269172::NW_021838529.1:17488-17988	LOC109423424::NW_021838529.1:185462-185962
1201	LOC109405423::NW_021838530.1:181520-182020	LOC115269183::NW_021838530.1:353220-353720
1202	LOC115269264::NW_021838541.1:10805-11305	LOC109423138::NW_021838541.1:40878-41378
1203	LOC115269274::NW_021838542.1:274658-275158	LOC109430995::NW_021838603.1:130222-130722
1204	LOC115269276::NW_021838542.1:501975-502475	LOC109430914::NW_021838603.1:384035-384535
1205	LOC109415300::NW_021837369.1:49505-50005	LOC115269279::NW_021838543.1:2652415-2652915
1206	LOC115269278::NW_021838543.1:279803-280303	LOC115269280::NW_021838543.1:2653075-2653575
1207	LOC109407870::NW_021837423.1:76178-76678	LOC115269289::NW_021838543.1:7607531-7608031
1208	LOC115268712::NW_021838486.1:386586-387086	LOC115269289::NW_021838543.1:7607531-7608031
1209	LOC115269301::NW_021838543.1:279143-279643	LOC115269279::NW_021838543.1:2652415-2652915
1210	LOC115265401::NW_021838153.1:70643638-70644138	LOC115269304::NW_021838543.1:728418-728918
1211	LOC109415284::NW_021838543.1:3761484-3761984	LOC115269314::NW_021838543.1:4060274-4060774
1212	LOC109623211::NW_021838543.1:3868743-3869243	LOC115269315::NW_021838543.1:4163073-4163573
1213	LOC115269319::NW_021838543.1:4527729-4528229	LOC109408278::NW_021838543.1:5462874-5463374
1214	LOC115269354::NW_021838547.1:259997-260497	LOC109419765::NW_021838687.1:25260802-25261302
1215	LOC115269356::NW_021838547.1:596251-596751	LOC109419769::NW_021838687.1:23812413-23812913
1216	LOC115269372::NW_021838552.1:302743-303243	LOC109427548::NW_021838798.1:42899076-42899576
1217	LOC115269399::NW_021838554.1:4985814-4986314	LOC115255851::NW_021838719.1:163141-163641
1218	LOC115264313::NW_021837045.1:32450327-32450827	LOC115269427::NW_021837045.1:160189767-160190267
1219	LOC109428751::NW_021838525.1:480851-481351	LOC115269432::NW_021838554.1:6403762-6404262
1220	LOC115269440::NW_021838554.1:6823022-6823522	LOC109424525::NW_021838554.1:7154678-7155178
1221	LOC115269444::NW_021838554.1:6901368-6901868	LOC109428772::NW_021838554.1:7232671-7233171
1222	LOC109411053::NW_021837822.1:13555174-13555674	LOC115269451::NW_021838555.1:86031-86531
1223	LOC109398594::NW_021837822.1:13620339-13620839	LOC115269452::NW_021838555.1:157313-157813
1224	LOC115264162::NW_021837822.1:13579054-13579554	LOC115269453::NW_021838555.1:111145-111645
1225	LOC115269454::NW_021838556.1:538514-539014	LOC115258482::NW_021839020.1:46968081-46968581
1226	LOC115261314::NW_021837267.1:12353210-12353710	LOC115269502::NW_021838563.1:238331-238831
1227	LOC109422825::NW_021838564.1:96330-96830	LOC115269504::NW_021838564.1:143421-143921
1228	LOC115268109::NW_021838465.1:30472739-30473239	LOC115269523::NW_021838565.1:7109845-7110345
1229	LOC109404849::NW_021837045.1:153813297-153813797	LOC115269552::NW_021837045.1:161745497-161745997
1230	LOC109622073::NW_021837045.1:157241939-157242439	LOC115269552::NW_021837045.1:161745497-161745997
1231	LOC109622075::NW_021837045.1:153913989-153914489	LOC115269560::NW_021837045.1:161874271-161874771
1232	LOC109432959::NW_021838565.1:2408783-2409283	LOC115269562::NW_021838565.1:4339200-4339700
1233	LOC115269590::NW_021838567.1:242423-242923	LOC109426259::NW_021838597.1:248347-248847
1234	LOC115269621::NW_021838575.1:43017-43517	LOC109423853::NW_021838576.1:54281546-54282046
1235	LOC109400574::NW_021838576.1:29259638-29260138	LOC115269691::NW_021838576.1:30393459-30393959
1236	LOC115269714::NW_021838576.1:46748627-46749127	LOC115269715::NW_021838576.1:46863015-46863515
1237	LOC115269749::NW_021838576.1:67914587-67915087	LOC109430577::NW_021838576.1:68836102-68836602
1238	LOC115256618::NW_021837046.1:9849951-9850451	LOC115269756::NW_021838576.1:76032881-76033381
1239	LOC115269775::NW_021838576.1:87450905-87451405	LOC115269785::NW_021838576.1:93450781-93451281
1240	LOC109408645::NW_021838576.1:98543856-98544356	LOC115269806::NW_021838576.1:113997890-113998390
1241	LOC109622166::NW_021838576.1:98602727-98603227	LOC115269807::NW_021838576.1:114052453-114052953
1242	LOC115269617::NW_021838575.1:380043-380543	LOC115269857::NW_021838576.1:52297228-52297728
1243	LOC115256092::NW_021837046.1:48682570-48683070	LOC115269882::NW_021838576.1:77071476-77071976
1244	LOC115269910::NW_021838576.1:95495512-95496012	LOC109403065::NW_021838765.1:2963283-2963783
1245	LOC115265139::NW_021838153.1:42718129-42718629	LOC115269930::NW_021838576.1:115670846-115671346
1246	LOC115269964::NW_021838576.1:1560787-1561287	LOC109425698::NW_021838576.1:2937860-2938360
1247	LOC109400730::NW_021838576.1:15067618-15068118	LOC115270025::NW_021838576.1:17498641-17499141
1248	LOC109399405::NW_021838576.1:20560446-20560946	LOC115270035::NW_021838576.1:21118925-21119425
1249	LOC109400696::NW_021838576.1:20696965-20697465	LOC115270044::NW_021838576.1:21262436-21262936
1250	LOC115270053::NW_021838576.1:23246530-23247030	LOC109413197::NW_021838576.1:23254747-23255247
1251	LOC115270053::NW_021838576.1:23246530-23247030	LOC109413299::NW_021838576.1:23276396-23276896
1252	LOC115270055::NW_021838576.1:23295268-23295768	LOC109404547::NW_021838576.1:23305283-23305783
1253	LOC115266976::NW_021838401.1:959829-960329	LOC115270056::NW_021838576.1:23298960-23299460
1254	LOC115270059::NW_021838576.1:23322267-23322767	LOC115270056::NW_021838576.1:23298960-23299460
1255	LOC115270060::NW_021838576.1:23327305-23327805	LOC109621652::NW_021838576.1:24492641-24493141
1256	LOC115270062::NW_021838576.1:23329837-23330337	LOC109400639::NW_021838576.1:23401460-23401960
1257	LOC115270062::NW_021838576.1:23329837-23330337	LOC109404521::NW_021838576.1:23392883-23393383
1258	LOC115270064::NW_021838576.1:23336045-23336545	LOC115270067::NW_021838576.1:23344798-23345298
1259	LOC115270068::NW_021838576.1:23347344-23347844	LOC109400639::NW_021838576.1:23401460-23401960
1260	LOC115270069::NW_021838576.1:23346692-23347192	LOC109400638::NW_021838576.1:23400808-23401308
1261	LOC115270066::NW_021838576.1:23341031-23341531	LOC115270070::NW_021838576.1:23349785-23350285
1262	LOC115270064::NW_021838576.1:23336045-23336545	LOC115270071::NW_021838576.1:23353569-23354069
1263	LOC115270067::NW_021838576.1:23344798-23345298	LOC115270071::NW_021838576.1:23353569-23354069
1264	LOC115270076::NW_021838576.1:23383726-23384226	LOC109400638::NW_021838576.1:23400808-23401308
1265	LOC115270079::NW_021838576.1:23362342-23362842	LOC115270071::NW_021838576.1:23353569-23354069
1266	LOC109404523::NW_021838576.1:23395460-23395960	LOC115270082::NW_021838576.1:23404037-23404537
1267	LOC109404569::NW_021838576.1:23386883-23387383	LOC115270082::NW_021838576.1:23404037-23404537
1268	LOC115266975::NW_021838401.1:951069-951569	LOC115270082::NW_021838576.1:23404037-23404537
1269	LOC115270063::NW_021838576.1:23332414-23332914	LOC115270082::NW_021838576.1:23404037-23404537
1270	LOC109400638::NW_021838576.1:23400808-23401308	LOC115270084::NW_021838576.1:23409379-23409879
1271	LOC109404520::NW_021838576.1:23392231-23392731	LOC115270084::NW_021838576.1:23409379-23409879
1272	LOC109404534::NW_021838576.1:23337938-23338438	LOC115270084::NW_021838576.1:23409379-23409879
1273	LOC109404592::NW_021838576.1:23329186-23329686	LOC115270084::NW_021838576.1:23409379-23409879
1274	LOC109413309::NW_021838576.1:23355464-23355964	LOC115270084::NW_021838576.1:23409379-23409879
1275	LOC109621652::NW_021838576.1:24492641-24493141	LOC115270084::NW_021838576.1:23409379-23409879
1276	LOC115270069::NW_021838576.1:23346692-23347192	LOC115270084::NW_021838576.1:23409379-23409879
1277	LOC115270076::NW_021838576.1:23383726-23384226	LOC115270084::NW_021838576.1:23409379-23409879
1278	LOC109404524::NW_021838576.1:23390334-23390834	LOC115270086::NW_021838576.1:23407486-23407986
1279	LOC109404554::NW_021838576.1:23303391-23303891	LOC115270086::NW_021838576.1:23407486-23407986
1280	LOC109413179::NW_021838576.1:23325413-23325913	LOC115270086::NW_021838576.1:23407486-23407986
1281	LOC115270058::NW_021838576.1:23312120-23312620	LOC115270086::NW_021838576.1:23407486-23407986
1282	LOC109404524::NW_021838576.1:23390334-23390834	LOC115270087::NW_021838576.1:23398911-23399411
1283	LOC109404554::NW_021838576.1:23303391-23303891	LOC115270087::NW_021838576.1:23398911-23399411
1284	LOC109413179::NW_021838576.1:23325413-23325913	LOC115270087::NW_021838576.1:23398911-23399411
1285	LOC115270087::NW_021838576.1:23398911-23399411	LOC115270086::NW_021838576.1:23407486-23407986
1286	LOC115270094::NW_021838576.1:24490751-24491251	LOC115270086::NW_021838576.1:23407486-23407986
1287	LOC109400614::NW_021838576.1:29481051-29481551	LOC115270114::NW_021838576.1:30605456-30605956
1288	LOC115270130::NW_021838576.1:36203840-36204340	LOC109426947::NW_021838576.1:36246645-36247145
1289	LOC109408066::NW_021838576.1:46703803-46704303	LOC115270159::NW_021838576.1:46813951-46814451
1290	LOC109408065::NW_021838576.1:46758496-46758996	LOC115270160::NW_021838576.1:46872904-46873404
1291	LOC109405136::NW_021838576.1:46038231-46038731	LOC115270165::NW_021838576.1:49090199-49090699
1292	LOC115270166::NW_021838576.1:49363093-49363593	LOC109428708::NW_021838576.1:50130605-50131105
1293	LOC115270199::NW_021838576.1:54108742-54109242	LOC109423853::NW_021838576.1:54281546-54282046
1294	LOC115270219::NW_021838576.1:56836988-56837488	LOC115270218::NW_021838576.1:56909278-56909778
1295	LOC109417488::NW_021838576.1:56827629-56828129	LOC115270239::NW_021838576.1:60978119-60978619
1296	LOC115270213::NW_021838576.1:56811034-56811534	LOC115270240::NW_021838576.1:60970500-60971000
1297	LOC109430681::NW_021838576.1:56833451-56833951	LOC115270241::NW_021838576.1:60982667-60983167
1298	LOC115270217::NW_021838576.1:56900524-56901024	LOC115270241::NW_021838576.1:60982667-60983167
1299	LOC109430620::NW_021838576.1:65802167-65802667	LOC115270253::NW_021838576.1:65987476-65987976
1300	LOC115270257::NW_021838576.1:66916681-66917181	LOC109430643::NW_021838576.1:69769374-69769874
1301	LOC115270274::NW_021838576.1:68360036-68360536	LOC109423799::NW_021838576.1:69272599-69273099
1302	LOC115270276::NW_021837045.1:183280278-183280778	LOC109401064::NW_021837045.1:183785352-183785852
1303	LOC115270278::NW_021838576.1:69318282-69318782	LOC109414846::NW_021838576.1:69359942-69360442
1304	LOC109427064::NW_021838109.1:100763-101263	LOC115270283::NW_021838576.1:69557911-69558411
1305	LOC115270284::NW_021838576.1:69857859-69858359	LOC115270290::NW_021838576.1:70597786-70598286
1306	LOC115270291::NW_021838576.1:70956375-70956875	LOC109423770::NW_021838576.1:72058459-72058959
1307	LOC115270300::NW_021838576.1:72382489-72382989	LOC109423781::NW_021837061.1:37036-37536
1308	LOC109423781::NW_021837061.1:37036-37536	LOC115270301::NW_021838576.1:72573548-72574048
1309	LOC109408418::NW_021837045.1:183133169-183133669	LOC115270313::NW_021837045.1:183653546-183654046
1310	LOC115263504::NW_021837634.1:1388843-1389343	LOC115270320::NW_021838576.1:82832376-82832876
1311	LOC115270328::NW_021838576.1:84384122-84384622	LOC115254262::NW_021838576.1:110324481-110324981
1312	LOC109403128::NW_021838576.1:86379202-86379702	LOC115270345::NW_021838576.1:86544328-86544828
1313	LOC115270346::NW_021838576.1:87042004-87042504	LOC109404267::NW_021838576.1:92984592-92985092
1314	LOC109404304::NW_021838076.1:779320-779820	LOC115270366::NW_021838576.1:91751712-91752212
1315	LOC109404373::NW_021838076.1:970619-971119	LOC115270368::NW_021838576.1:91929867-91930367
1316	LOC109403105::NW_021838076.1:865195-865695	LOC115270370::NW_021838576.1:91824687-91825187
1317	LOC109403077::NW_021838576.1:88353232-88353732	LOC115270392::NW_021838576.1:96660684-96661184
1318	LOC115270394::NW_021838576.1:98503094-98503594	LOC109408647::NW_021838576.1:113960429-113960929
1319	LOC115260538::NW_021837156.1:41482674-41483174	LOC115270397::NW_021838576.1:99680200-99680700
1320	LOC115270399::NW_021838576.1:100613378-100613878	LOC109420807::NW_021838910.1:2352273-2352773
1321	LOC115270431::NW_021838576.1:111585120-111585620	LOC115270433::NW_021838576.1:111612585-111613085
1322	LOC109408644::NW_021838576.1:98546387-98546887	LOC115270438::NW_021838576.1:114000421-114000921
1323	LOC109622200::NW_021838576.1:98549945-98550445	LOC115270439::NW_021838576.1:114003961-114004461
1324	LOC109622202::NW_021838576.1:98583832-98584332	LOC115270440::NW_021838576.1:114022124-114022624
1325	LOC115270469::NW_021838576.1:121948040-121948540	LOC115256668::NW_021838798.1:68319468-68319968
1326	LOC115270915::NW_021838577.1:6931939-6932439	LOC115253974::NW_021838798.1:94542514-94543014
1327	LOC109428245::NW_021838233.1:13488344-13488844	LOC115271029::NW_021838589.1:110145-110645
1328	LOC109422671::NW_021838154.1:24382694-24383194	LOC115271068::NW_021838599.1:3634137-3634637
1329	LOC115260553::NW_021837045.1:40421933-40422433	LOC115271103::NW_021838600.1:467244-467744

## Sheet: Twins_regions_5_500bp
	Pos_1_gene_1	Pos_2_gene1
1	LOC109397473::NW_021838687.1:57118900-57119400	LOC109397475::NW_021838687.1:57126317-57126817
2	LOC109397482::NW_021838687.1:57114018-57114518	LOC109397494::NW_021838687.1:60350854-60351354
3	LOC109397487::NW_021838687.1:57128842-57129342	LOC109397494::NW_021838687.1:60350854-60351354
4	LOC109397503::NW_021838687.1:60344395-60344895	LOC109397481::NW_021838687.1:60351508-60352008
5	LOC109397482::NW_021838687.1:57114018-57114518	LOC109397504::NW_021838687.1:60343741-60344241
6	LOC109397487::NW_021838687.1:57128842-57129342	LOC109397504::NW_021838687.1:60343741-60344241
7	LOC109397504::NW_021838687.1:60343741-60344241	LOC109397494::NW_021838687.1:60350854-60351354
8	LOC109398559::NW_021837822.1:12173436-12173936	LOC109398360::NW_021837822.1:12915521-12916021
9	LOC109397037::NW_021838153.1:156537522-156538022	LOC109398598::NW_021838532.1:67798-68298
10	LOC109398729::NW_021839020.1:29913262-29913762	LOC109398673::NW_021839020.1:31388516-31389016
11	LOC109399267::NW_021838466.1:7586112-7586612	LOC109398598::NW_021838532.1:67798-68298
12	LOC109399330::NW_021837045.1:152957324-152957824	LOC109399335::NW_021837045.1:152957324-152957824
13	LOC109399533::NW_021838454.1:481038-481538	LOC109398113::NW_021838454.1:2886210-2886710
14	LOC109400226::NW_021837600.1:2192252-2192752	LOC109400233::NW_021838153.1:28043-28543
15	LOC109400382::NW_021838798.1:3473222-3473722	LOC109398400::NW_021838798.1:3711905-3712405
16	LOC109400467::NW_021838646.1:171829-172329	LOC109399676::NW_021838712.1:166073-166573
17	LOC109400689::NW_021838576.1:20245224-20245724	LOC109399383::NW_021838576.1:20832349-20832849
18	LOC109400736::NW_021839130.1:15085131-15085631	LOC109397127::NW_021839130.1:15650580-15651080
19	LOC109399591::NW_021838465.1:44683272-44683772	LOC109400785::NW_021838465.1:45181834-45182334
20	LOC109400976::NW_021838465.1:50958310-50958810	LOC109399660::NW_021838646.1:358538-359038
21	LOC109399720::NW_021837711.1:45007392-45007892	LOC109402022::NW_021837711.1:45230712-45231212
22	LOC109403393::NW_021838909.1:77801310-77801810	LOC109403394::NW_021838909.1:81949612-81950112
23	LOC109398931::NW_021837267.1:6846882-6847382	LOC109403725::NW_021837267.1:6988981-6989481
24	LOC109403738::NW_021837267.1:7188417-7188917	LOC109398941::NW_021838765.1:4531442-4531942
25	LOC109404088::NW_021837822.1:35526016-35526516	LOC109403941::NW_021837822.1:35726138-35726638
26	LOC109404276::NW_021838576.1:86679201-86679701	LOC109403127::NW_021838576.1:92793713-92794213
27	LOC109404302::NW_021838076.1:911404-911904	LOC109403098::NW_021838576.1:91880132-91880632
28	LOC109404306::NW_021838076.1:822674-823174	LOC109403110::NW_021838576.1:91779478-91779978
29	LOC109403100::NW_021838076.1:676015-676515	LOC109404307::NW_021838576.1:91613958-91614458
30	LOC109403124::NW_021838576.1:86273427-86273927	LOC109404336::NW_021838576.1:92584976-92585476
31	LOC109404520::NW_021838576.1:23392231-23392731	LOC109400638::NW_021838576.1:23400808-23401308
32	LOC109404521::NW_021838576.1:23392883-23393383	LOC109400639::NW_021838576.1:23401460-23401960
33	LOC109404534::NW_021838576.1:23337938-23338438	LOC109400638::NW_021838576.1:23400808-23401308
34	LOC109404558::NW_021838576.1:23251216-23251716	LOC109404553::NW_021838576.1:23272543-23273043
35	LOC109404569::NW_021838576.1:23386883-23387383	LOC109404523::NW_021838576.1:23395460-23395960
36	LOC109404593::NW_021838576.1:23410031-23410531	LOC109400639::NW_021838576.1:23401460-23401960
37	LOC109404650::NW_021837046.1:17784881-17785381	LOC109401431::NW_021837046.1:19212784-19213284
38	LOC109400357::NW_021838233.1:14319814-14320314	LOC109404969::NW_021838909.1:22880298-22880798
39	LOC109405034::NW_021837045.1:160237062-160237562	LOC109405037::NW_021837045.1:162354683-162355183
40	LOC109399598::NW_021837931.1:1636664-1637164	LOC109405327::NW_021837931.1:3659042-3659542
41	LOC109405344::NW_021838688.1:1659516-1660016	LOC109397804::NW_021838688.1:856656-857156
42	LOC109397817::NW_021838688.1:1865945-1866445	LOC109405354::NW_021838688.1:1053751-1054251
43	LOC109405370::NW_021838688.1:436625-437125	LOC109397829::NW_021838798.1:90188891-90189391
44	LOC109405455::NW_021837111.1:1153-1653	LOC109402413::NW_021837168.1:700307-700807
45	LOC109405473::NW_021837168.1:725137-725637	LOC109402437::NW_021837168.1:1304048-1304548
46	LOC109403775::NW_021837600.1:49225966-49226466	LOC109405971::NW_021838506.1:217680-218180
47	LOC109406116::NW_021837267.1:3951145-3951645	LOC109401743::NW_021837267.1:4654996-4655496
48	LOC109406122::NW_021837267.1:4278513-4279013	LOC109401744::NW_021837267.1:5065616-5066116
49	LOC109406132::NW_021837267.1:4444170-4444670	LOC109401764::NW_021837267.1:5190227-5190727
50	LOC109406300::NW_021837267.1:45308597-45309097	LOC109404468::NW_021837267.1:46366312-46366812
51	LOC109406348::NW_021838976.1:149770-150270	LOC109397614::NW_021839166.1:109668-110168
52	LOC109405301::NW_021838976.1:2371622-2372122	LOC109406359::NW_021838976.1:2660083-2660583
53	LOC109405312::NW_021838976.1:2273142-2273642	LOC109406383::NW_021838976.1:2581504-2582004
54	LOC109406517::NW_021837267.1:12186681-12187181	LOC109403312::NW_021838563.1:28019-28519
55	LOC109402619::NW_021838798.1:48357001-48357501	LOC109406596::NW_021838798.1:49903128-49903628
56	LOC109402647::NW_021838798.1:48305043-48305543	LOC109406600::NW_021838798.1:49862544-49863044
57	LOC109406857::NW_021837778.1:18429-18929	LOC109398692::NW_021839020.1:40883078-40883578
58	LOC109404443::NW_021837267.1:48470774-48471274	LOC109406888::NW_021838501.1:309939-310439
59	LOC109406987::NW_021838638.1:98517-99017	LOC109397888::NW_021838798.1:53861201-53861701
60	LOC109407066::NW_021837045.1:176293373-176293873	LOC109398985::NW_021838798.1:79129874-79130374
61	LOC109397477::NW_021838687.1:59376988-59377488	LOC109407175::NW_021838687.1:59391003-59391503
62	LOC109397491::NW_021838687.1:60341247-60341747	LOC109407180::NW_021838687.1:60348363-60348863
63	LOC109408016::NW_021838576.1:46077351-46077851	LOC109405149::NW_021838576.1:49136743-49137243
64	LOC109405145::NW_021838576.1:45391946-45392446	LOC109408030::NW_021838576.1:48367967-48368467
65	LOC109408410::NW_021837045.1:183401025-183401525	LOC109401042::NW_021837045.1:183952931-183953431
66	LOC109403044::NW_021838576.1:88678767-88679267	LOC109408667::NW_021838576.1:96931381-96931881
67	LOC109403058::NW_021838576.1:88615582-88616082	LOC109408669::NW_021838576.1:96882163-96882663
68	LOC109403082::NW_021838576.1:88591380-88591880	LOC109408671::NW_021838576.1:96864555-96865055
69	LOC109408676::NW_021838576.1:88478628-88479128	LOC109403048::NW_021838576.1:96764996-96765496
70	LOC109403069::NW_021838576.1:88211073-88211573	LOC109408684::NW_021838576.1:96453195-96453695
71	LOC109408775::NW_021838465.1:4325067-4325567	LOC109408774::NW_021838465.1:5424959-5425459
72	LOC109408802::NW_021838391.1:587504-588004	LOC109408804::NW_021838465.1:9056933-9057433
73	LOC109408897::NW_021838343.1:7721318-7721818	LOC109408236::NW_021839152.1:112310-112810
74	LOC109409854::NW_021838465.1:27344563-27345063	LOC109397116::NW_021838465.1:30005177-30005677
75	LOC109410161::NW_021837329.1:54281-54781	LOC109407831::NW_021838153.1:71403363-71403863
76	LOC109410424::NW_021837045.1:50581012-50581512	LOC109401462::NW_021837045.1:51275746-51276246
77	LOC109410440::NW_021837045.1:54801966-54802466	LOC109401457::NW_021838795.1:270510-271010
78	LOC109410465::NW_021837045.1:50450544-50451044	LOC109401485::NW_021837045.1:51179403-51179903
79	LOC109411083::NW_021837045.1:118830081-118830581	LOC109410903::NW_021837045.1:119254721-119255221
80	LOC109411089::NW_021838343.1:1871209-1871709	LOC109410268::NW_021838343.1:3705329-3705829
81	LOC109411109::NW_021837045.1:118785867-118786367	LOC109410905::NW_021837045.1:119205624-119206124
82	LOC109411128::NW_021838343.1:8927647-8928147	LOC109408195::NW_021839191.1:13049-13549
83	LOC109407912::NW_021838466.1:2930492-2930992	LOC109411405::NW_021838466.1:9800125-9800625
84	LOC109401827::NW_021838699.1:1049172-1049672	LOC109412092::NW_021838699.1:1099129-1099629
85	LOC109405810::NW_021837045.1:61511055-61511555	LOC109412341::NW_021838343.1:2945219-2945719
86	LOC109412539::NW_021838385.1:777793-778293	LOC109412590::NW_021838576.1:102759038-102759538
87	LOC109412620::NW_021837931.1:24377573-24378073	LOC109401558::NW_021837931.1:24644601-24645101
88	LOC109409534::NW_021838798.1:5076009-5076509	LOC109412988::NW_021838798.1:6326415-6326915
89	LOC109409468::NW_021838588.1:6191303-6191803	LOC109412989::NW_021838588.1:6633886-6634386
90	LOC109409507::NW_021838576.1:120167062-120167562	LOC109413017::NW_021838588.1:6273707-6274207
91	LOC109413111::NW_021838909.1:16756419-16756919	LOC109413112::NW_021838909.1:17710889-17711389
92	LOC109413165::NW_021837600.1:46946949-46947449	LOC109408146::NW_021839153.1:1227258-1227758
93	LOC109413177::NW_021838576.1:23261905-23262405	LOC109404563::NW_021838576.1:23270715-23271215
94	LOC109413189::NW_021838576.1:23263733-23264233	LOC109404553::NW_021838576.1:23272543-23273043
95	LOC109413199::NW_021838576.1:23248727-23249227	LOC109404564::NW_021838576.1:23270063-23270563
96	LOC109413239::NW_021838417.1:65412-65912	LOC109402166::NW_021838417.1:170798-171298
97	LOC109404546::NW_021838576.1:23267791-23268291	LOC109413299::NW_021838576.1:23276396-23276896
98	LOC109413197::NW_021838576.1:23254747-23255247	LOC109413299::NW_021838576.1:23276396-23276896
99	LOC109413309::NW_021838576.1:23355464-23355964	LOC109400638::NW_021838576.1:23400808-23401308
100	LOC109413378::NW_021837822.1:35589602-35590102	LOC109413358::NW_021837822.1:35682668-35683168
101	LOC109413414::NW_021837822.1:35625499-35625999	LOC109403941::NW_021837822.1:35726138-35726638
102	LOC109404947::NW_021838576.1:30064333-30064833	LOC109413507::NW_021838576.1:31209399-31209899
103	LOC109413554::NW_021837489.1:41439036-41439536	LOC109407903::NW_021837489.1:43947629-43948129
104	LOC109413581::NW_021837489.1:37706109-37706609	LOC109401225::NW_021837489.1:40859578-40860078
105	LOC109413608::NW_021837489.1:36720770-36721270	LOC109401236::NW_021837489.1:39907826-39908326
106	LOC109407929::NW_021838466.1:2120008-2120508	LOC109413857::NW_021838466.1:2592496-2592996
107	LOC109413859::NW_021838466.1:2133745-2134245	LOC109408070::NW_021838466.1:2609106-2609606
108	LOC109407934::NW_021838466.1:1903964-1904464	LOC109413869::NW_021839186.1:2107665-2108165
109	LOC109413878::NW_021838466.1:2004305-2004805	LOC109408071::NW_021839186.1:2197375-2197875
110	LOC109413987::NW_021837623.1:1239555-1240055	LOC109399190::NW_021838153.1:96828403-96828903
111	LOC109404233::NW_021838042.1:17304676-17305176	LOC109414032::NW_021838383.1:450933-451433
112	LOC109414034::NW_021838042.1:13471895-13472395	LOC109404241::NW_021838042.1:17326522-17327022
113	LOC109407247::NW_021839020.1:50580835-50581335	LOC109414315::NW_021839020.1:52194083-52194583
114	LOC109414404::NW_021838465.1:61295761-61296261	LOC109410590::NW_021838465.1:61872507-61873007
115	LOC109414708::NW_021838699.1:4036998-4037498	LOC109401879::NW_021838699.1:4844187-4844687
116	LOC109403605::NW_021838432.1:2844010-2844510	LOC109414760::NW_021838432.1:5472885-5473385
117	LOC109401945::NW_021837711.1:9560905-9561405	LOC109414846::NW_021838576.1:69359942-69360442
118	LOC109403285::NW_021837267.1:17326420-17326920	LOC109415064::NW_021837267.1:17714918-17715418
119	LOC109415098::NW_021837323.1:1085935-1086435	LOC109403000::NW_021837323.1:1225981-1226481
120	LOC109400859::NW_021837045.1:129080785-129081285	LOC109415500::NW_021837045.1:130068192-130068692
121	LOC109400807::NW_021837045.1:130448495-130448995	LOC109415509::NW_021837045.1:130752439-130752939
122	LOC109401332::NW_021837045.1:100928713-100929213	LOC109415782::NW_021837045.1:101770300-101770800
123	LOC109415796::NW_021838909.1:37168677-37169177	LOC109398678::NW_021839130.1:46917218-46917718
124	LOC109415911::NW_021837931.1:25505126-25505626	LOC109412644::NW_021837931.1:25685160-25685660
125	LOC109415912::NW_021837156.1:35851776-35852276	LOC109412955::NW_021837156.1:41990398-41990898
126	LOC109415922::NW_021837822.1:19817570-19818070	LOC109411503::NW_021837822.1:20275691-20276191
127	LOC109415927::NW_021837822.1:19887578-19888078	LOC109411505::NW_021837822.1:20350172-20350672
128	LOC109416077::NW_021837822.1:23859934-23860434	LOC109402947::NW_021837822.1:24480860-24481360
129	LOC109416112::NW_021837822.1:23735907-23736407	LOC109402910::NW_021837822.1:24339741-24340241
130	LOC109404996::NW_021837267.1:54520368-54520868	LOC109416158::NW_021837379.1:1024091-1024591
131	LOC109404975::NW_021837267.1:54235069-54235569	LOC109416160::NW_021837379.1:1027030-1027530
132	LOC109416185::NW_021837267.1:51251630-51252130	LOC109404461::NW_021837333.1:1826-2326
133	LOC109412353::NW_021837046.1:27514292-27514792	LOC109416188::NW_021837046.1:31073937-31074437
134	LOC109412350::NW_021837046.1:28240814-28241314	LOC109416190::NW_021837046.1:31155073-31155573
135	LOC109416591::NW_021837046.1:26194054-26194554	LOC109412354::NW_021837046.1:30483229-30483729
136	LOC109416680::NW_021838343.1:14623117-14623617	LOC109416493::NW_021838343.1:14739741-14740241
137	LOC109415608::NW_021839130.1:39194016-39194516	LOC109416911::NW_021839130.1:40011631-40012131
138	LOC109416931::NW_021837600.1:49107721-49108221	LOC109403770::NW_021838506.1:111445-111945
139	LOC109417539::NW_021838384.1:403476-403976	LOC109410223::NW_021838390.1:390409-390909
140	LOC109410231::NW_021838384.1:582830-583330	LOC109417548::NW_021838390.1:572654-573154
141	LOC109417710::NW_021838687.1:76290322-76290822	LOC109417761::NW_021838687.1:78014772-78015272
142	LOC109418218::NW_021838488.1:437204-437704	LOC109418216::NW_021838488.1:3885856-3886356
143	LOC109418287::NW_021837600.1:8537061-8537561	LOC109412464::NW_021838419.1:745440-745940
144	LOC109413079::NW_021838909.1:11878958-11879458	LOC109418506::NW_021838909.1:13132208-13132708
145	LOC109418536::NW_021838909.1:16465967-16466467	LOC109413096::NW_021838909.1:17447665-17448165
146	LOC109418548::NW_021838909.1:17736524-17737024	LOC109413113::NW_021839046.1:16076-16576
147	LOC109418775::NW_021838909.1:38183175-38183675	LOC109415835::NW_021839108.1:222876-223376
148	LOC109417077::NW_021838909.1:40111818-40112318	LOC109418811::NW_021838909.1:40245140-40245640
149	LOC109418952::NW_021837541.1:10569-11069	LOC109399650::NW_021838465.1:54219366-54219866
150	LOC109419038::NW_021837523.1:754442-754942	LOC109419054::NW_021839020.1:5623792-5624292
151	LOC109419096::NW_021837523.1:441826-442326	LOC109409328::NW_021839020.1:5360277-5360777
152	LOC109419117::NW_021839020.1:2603571-2604071	LOC109409311::NW_021839020.1:6688378-6688878
153	LOC109407487::NW_021837045.1:29411921-29412421	LOC109419226::NW_021837331.1:30156-30656
154	LOC109419238::NW_021837045.1:30275069-30275569	LOC109407476::NW_021837045.1:30519894-30520394
155	LOC109408461::NW_021837045.1:174703616-174704116	LOC109419338::NW_021837045.1:175136240-175136740
156	LOC109409296::NW_021839020.1:4348198-4348698	LOC109419529::NW_021839020.1:8455669-8456169
157	LOC109419551::NW_021839020.1:4643556-4644056	LOC109409378::NW_021839020.1:8779170-8779670
158	LOC109409286::NW_021839020.1:4891732-4892232	LOC109419566::NW_021839020.1:9052223-9052723
159	LOC109419636::NW_021837909.1:1215559-1216059	LOC109408505::NW_021838637.1:223170-223670
160	LOC109410012::NW_021838153.1:50631854-50632354	LOC109419661::NW_021838153.1:52411318-52411818
161	LOC109398225::NW_021838687.1:16819397-16819897	LOC109419776::NW_021838687.1:18506732-18507232
162	LOC109420208::NW_021838687.1:23496773-23497273	LOC109419765::NW_021838687.1:25260802-25261302
163	LOC109401669::NW_021838909.1:47233704-47234204	LOC109420297::NW_021838909.1:51244937-51245437
164	LOC109401673::NW_021838909.1:50496451-50496951	LOC109420344::NW_021838909.1:52466636-52467136
165	LOC109420362::NW_021838909.1:53955882-53956382	LOC109401661::NW_021838909.1:54971228-54971728
166	LOC109420419::NW_021838909.1:65542574-65543074	LOC109402331::NW_021838909.1:68323515-68324015
167	LOC109420424::NW_021838444.1:319041-319541	LOC109402341::NW_021838909.1:65384529-65385029
168	LOC109420464::NW_021837378.1:32216914-32217414	LOC109420463::NW_021837378.1:32221149-32221649
169	LOC109420465::NW_021837378.1:32212677-32213177	LOC109420463::NW_021837378.1:32221149-32221649
170	LOC109420465::NW_021837378.1:32212677-32213177	LOC109420464::NW_021837378.1:32216914-32217414
171	LOC109420466::NW_021837378.1:32208442-32208942	LOC109420463::NW_021837378.1:32221149-32221649
172	LOC109420466::NW_021837378.1:32208442-32208942	LOC109420464::NW_021837378.1:32216914-32217414
173	LOC109420474::NW_021837378.1:54885886-54886386	LOC109420483::NW_021837378.1:54890043-54890543
174	LOC109420474::NW_021837378.1:54885886-54886386	LOC109420486::NW_021837378.1:54894203-54894703
175	LOC109420483::NW_021837378.1:54890043-54890543	LOC109420486::NW_021837378.1:54894203-54894703
176	LOC109420489::NW_021838687.1:27524784-27525284	LOC109407535::NW_021838687.1:28180393-28180893
177	LOC109420492::NW_021838687.1:26023278-26023778	LOC109419733::NW_021838687.1:26931222-26931722
178	LOC109414117::NW_021838687.1:44520718-44521218	LOC109420686::NW_021838687.1:47436004-47436504
179	LOC109414276::NW_021838595.1:184452-184952	LOC109420700::NW_021838687.1:44755099-44755599
180	LOC109420738::NW_021838687.1:53206482-53206982	LOC109419942::NW_021838687.1:53842827-53843327
181	LOC109420739::NW_021838687.1:53267329-53267829	LOC109419943::NW_021838687.1:53887808-53888308
182	LOC109420740::NW_021838687.1:53224196-53224696	LOC109419944::NW_021838687.1:53856214-53856714
183	LOC109407199::NW_021837834.1:1157580-1158080	LOC109420749::NW_021838153.1:41856427-41856927
184	LOC109412534::NW_021838385.1:480593-481093	LOC109420836::NW_021838576.1:102434565-102435065
185	LOC109412541::NW_021838385.1:949979-950479	LOC109420845::NW_021838576.1:102862198-102862698
186	LOC109411065::NW_021838576.1:105317163-105317663	LOC109420861::NW_021838576.1:121292886-121293386
187	LOC109420863::NW_021838576.1:106460645-106461145	LOC109401007::NW_021838576.1:122842167-122842667
188	LOC109413895::NW_021837104.1:56790-57290	LOC109421114::NW_021838732.1:2449797-2450297
189	LOC109421121::NW_021838489.1:594441-594941	LOC109408842::NW_021838513.1:572499-572999
190	LOC109421150::NW_021838465.1:56980228-56980728	LOC109410579::NW_021838465.1:58047560-58048060
191	LOC109421161::NW_021838465.1:56936506-56937006	LOC109410561::NW_021838465.1:57992113-57992613
192	LOC109410563::NW_021838465.1:56904463-56904963	LOC109421163::NW_021838465.1:57964908-57965408
193	LOC109410820::NW_021838395.1:900772-901272	LOC109421170::NW_021838787.1:311592-312092
194	LOC109410819::NW_021838395.1:916074-916574	LOC109421242::NW_021838787.1:328597-329097
195	LOC109397041::NW_021838687.1:49633952-49634452	LOC109421473::NW_021839130.1:62103331-62103831
196	LOC109421825::NW_021837156.1:27735140-27735640	LOC109421820::NW_021837156.1:21129891-21130391
197	LOC109421869::NW_021837047.1:277766-278266	LOC109413798::NW_021837156.1:31074238-31074738
198	LOC109421903::NW_021837489.1:1286296-1286796	LOC109408615::NW_021837489.1:3135108-3135608
199	LOC109421946::NW_021837489.1:1397352-1397852	LOC109408611::NW_021837489.1:3265519-3266019
200	LOC109401455::NW_021838643.1:1662168-1662668	LOC109422218::NW_021838643.1:4771266-4771766
201	LOC109422344::NW_021837545.1:242194-242694	LOC109401330::NW_021838043.1:252709-253209
202	LOC109417184::NW_021838200.1:418327-418827	LOC109422424::NW_021838909.1:90186312-90186812
203	LOC109422425::NW_021838909.1:88605472-88605972	LOC109417180::NW_021838909.1:89484151-89484651
204	LOC109422440::NW_021838909.1:89852380-89852880	LOC109417180::NW_021838909.1:89484151-89484651
205	LOC109422444::NW_021838909.1:88271230-88271730	LOC109400000::NW_021838909.1:89560459-89560959
206	LOC109422628::NW_021838142.1:52307-52807	LOC109402823::NW_021838599.1:485112-485612
207	LOC109422686::NW_021838154.1:23217538-23218038	LOC109401131::NW_021838599.1:2400958-2401458
208	LOC109422687::NW_021838154.1:23191423-23191923	LOC109401128::NW_021838599.1:2353681-2354181
209	LOC109422764::NW_021837156.1:20620769-20621269	LOC109421828::NW_021837156.1:21130926-21131426
210	LOC109422769::NW_021837156.1:22228366-22228866	LOC109421845::NW_021837156.1:28590711-28591211
211	LOC109422780::NW_021837156.1:21156502-21157002	LOC109421834::NW_021837156.1:27766536-27767036
212	LOC109422823::NW_021837156.1:18874372-18874872	LOC109400930::NW_021837156.1:25840415-25840915
213	LOC109422847::NW_021837267.1:29991340-29991840	LOC109421473::NW_021839130.1:62103331-62103831
214	LOC109400577::NW_021837489.1:26060702-26061202	LOC109422884::NW_021838450.1:45072-45572
215	LOC109405329::NW_021837156.1:900961-901461	LOC109422992::NW_021837156.1:1208999-1209499
216	LOC109423072::NW_021837445.1:1558-2058	LOC109405778::NW_021838687.1:20194091-20194591
217	LOC109419444::NW_021838533.1:256289-256789	LOC109423120::NW_021838632.1:5892849-5893349
218	LOC109419389::NW_021838533.1:32450-32950	LOC109423122::NW_021838632.1:5681260-5681760
219	LOC109423167::NW_021838781.1:287031-287531	LOC109422203::NW_021838503.1:52258-52758
220	LOC109397289::NW_021838406.1:519135-519635	LOC109423201::NW_021838632.1:1551583-1552083
221	LOC109423223::NW_021837711.1:1963822-1964322	LOC109397270::NW_021837711.1:2803379-2803879
222	LOC109397254::NW_021837711.1:2233673-2234173	LOC109423229::NW_021837711.1:3053420-3053920
223	LOC109423244::NW_021837323.1:1354726-1355226	LOC109408245::NW_021838632.1:142947-143447
224	LOC109423406::NW_021838153.1:122447052-122447552	LOC109418354::NW_021838233.1:7873451-7873951
225	LOC109402464::NW_021837822.1:809345-809845	LOC109423578::NW_021838434.1:94665-95165
226	LOC109400251::NW_021837822.1:5172219-5172719	LOC109423612::NW_021838321.1:417258-417758
227	LOC109398576::NW_021837822.1:9070000-9070500	LOC109423642::NW_021837822.1:9734322-9734822
228	LOC109399803::NW_021838718.1:10989-11489	LOC109423727::NW_021838465.1:56731371-56731871
229	LOC109423727::NW_021838465.1:56731371-56731871	LOC109423728::NW_021838576.1:28433459-28433959
230	LOC109408595::NW_021838576.1:54566786-54567286	LOC109423828::NW_021838576.1:55251703-55252203
231	LOC109423907::NW_021837045.1:101089056-101089556	LOC109415778::NW_021837045.1:101851363-101851863
232	LOC109423910::NW_021838153.1:152002698-152003198	LOC109404787::NW_021838153.1:153831263-153831763
233	LOC109423916::NW_021838153.1:152097812-152098312	LOC109404805::NW_021838153.1:153924652-153925152
234	LOC109424015::NW_021838154.1:4256196-4256696	LOC109416410::NW_021838154.1:6259157-6259657
235	LOC109398776::NW_021838343.1:5527732-5528232	LOC109424308::NW_021838508.1:585854-586354
236	LOC109424310::NW_021838665.1:5504058-5504558	LOC109407870::NW_021837423.1:76178-76678
237	LOC109424433::NW_021838654.1:2361125-2361625	LOC109422335::NW_021838654.1:2993950-2994450
238	LOC109422358::NW_021838403.1:847288-847788	LOC109424456::NW_021839208.1:1573076-1573576
239	LOC109422366::NW_021838403.1:513384-513884	LOC109424462::NW_021839208.1:1248765-1249265
240	LOC109422370::NW_021838403.1:289246-289746	LOC109424463::NW_021839208.1:1036924-1037424
241	LOC109422393::NW_021837045.1:153349384-153349884	LOC109424490::NW_021837311.1:10949-11449
242	LOC109424810::NW_021837822.1:33476607-33477107	LOC109414634::NW_021837976.1:191328-191828
243	LOC109424851::NW_021837822.1:30038952-30039452	LOC109414593::NW_021837822.1:31309655-31310155
244	LOC109425145::NW_021838517.1:611289-611789	LOC109412438::NW_021838576.1:63903413-63903913
245	LOC109400338::NW_021838042.1:5349315-5349815	LOC109425186::NW_021838042.1:5763567-5764067
246	LOC109399828::NW_021838410.1:8740310-8740810	LOC109425278::NW_021838410.1:9112317-9112817
247	LOC109419814::NW_021839130.1:55036643-55037143	LOC109425312::NW_021839130.1:55432338-55432838
248	LOC109425372::NW_021838410.1:6988135-6988635	LOC109399856::NW_021838410.1:7688781-7689281
249	LOC109399839::NW_021838410.1:7172881-7173381	LOC109425375::NW_021838410.1:7871712-7872212
250	LOC109398974::NW_021838998.1:2754965-2755465	LOC109425529::NW_021839130.1:39639810-39640310
251	LOC109425571::NW_021837045.1:113702953-113703453	LOC109411551::NW_021837045.1:114188205-114188705
252	LOC109407585::NW_021838538.1:378588-379088	LOC109425849::NW_021838538.1:529608-530108
253	LOC109418407::NW_021837045.1:12475626-12476126	LOC109426122::NW_021837734.1:126705-127205
254	LOC109418414::NW_021837045.1:13286707-13287207	LOC109426145::NW_021837045.1:15891773-15892273
255	LOC109426146::NW_021837045.1:13330409-13330909	LOC109418415::NW_021837045.1:15923377-15923877
256	LOC109398096::NW_021838856.1:209116-209616	LOC109426171::NW_021838454.1:5904739-5905239
257	LOC109398084::NW_021838454.1:5684402-5684902	LOC109426188::NW_021838454.1:7460512-7461012
258	LOC109410282::NW_021838567.1:189203-189703	LOC109426252::NW_021838597.1:220534-221034
259	LOC109410291::NW_021838567.1:365740-366240	LOC109426262::NW_021838597.1:358436-358936
260	LOC109410292::NW_021838567.1:331347-331847	LOC109426263::NW_021838597.1:330114-330614
261	LOC109426388::NW_021838454.1:1853503-1854003	LOC109398042::NW_021838454.1:3713497-3713997
262	LOC109426403::NW_021838454.1:1780183-1780683	LOC109398022::NW_021838454.1:3618679-3619179
263	LOC109426530::NW_021838465.1:73308516-73309016	LOC109408340::NW_021838465.1:73835737-73836237
264	LOC109399075::NW_021837623.1:1093706-1094206	LOC109426543::NW_021837623.1:1102653-1103153
265	LOC109426659::NW_021838153.1:17389468-17389968	LOC109426658::NW_021838427.1:456346-456846
266	LOC109426683::NW_021838153.1:12020836-12021336	LOC109417780::NW_021838153.1:13293750-13294250
267	LOC109426687::NW_021838153.1:11101666-11102166	LOC109417784::NW_021838153.1:13043431-13043931
268	LOC109417786::NW_021838153.1:10845002-10845502	LOC109426688::NW_021838153.1:12775589-12776089
269	LOC109426711::NW_021838153.1:9331320-9331820	LOC109408803::NW_021838153.1:34207605-34208105
270	LOC109417868::NW_021838153.1:3262524-3263024	LOC109426825::NW_021838153.1:4626572-4627072
271	LOC109426840::NW_021838153.1:930133-930633	LOC109417952::NW_021838153.1:1874247-1874747
272	LOC109413631::NW_021837489.1:30516542-30517042	LOC109426881::NW_021838821.1:139168-139668
273	LOC109426888::NW_021838991.1:76892-77392	LOC109426889::NW_021838643.1:5870206-5870706
274	LOC109411331::NW_021837045.1:66276030-66276530	LOC109427072::NW_021837045.1:66798224-66798724
275	LOC109427121::NW_021837045.1:88267851-88268351	LOC109400194::NW_021837045.1:90201373-90201873
276	LOC109427242::NW_021837267.1:38693981-38694481	LOC109411608::NW_021839070.1:164625-165125
277	LOC109411624::NW_021837123.1:458858-459358	LOC109427260::NW_021837267.1:34862363-34862863
278	LOC109427301::NW_021837045.1:7344978-7345478	LOC109418332::NW_021837045.1:8748714-8749214
279	LOC109427342::NW_021838542.1:585658-586158	LOC109412094::NW_021838603.1:490397-490897
280	LOC109427354::NW_021838542.1:577588-578088	LOC109412097::NW_021838603.1:483033-483533
281	LOC109414739::NW_021838153.1:24429746-24430246	LOC109427362::NW_021838419.1:829248-829748
282	LOC109425923::NW_021838798.1:51690949-51691449	LOC109427623::NW_021838909.1:27291658-27292158
283	LOC109418235::NW_021837390.1:1309329-1309829	LOC109428008::NW_021838707.1:32472-32972
284	LOC109428047::NW_021837045.1:4563810-4564310	LOC109418268::NW_021837045.1:5320827-5321327
285	LOC109411640::NW_021837123.1:1480903-1481403	LOC109428133::NW_021837123.1:1766468-1766968
286	LOC109427929::NW_021838233.1:13352296-13352796	LOC109428250::NW_021838233.1:17156438-17156938
287	LOC109428484::NW_021838798.1:63511262-63511762	LOC109412976::NW_021838798.1:64323710-64324210
288	LOC109428600::NW_021838798.1:59939375-59939875	LOC109416950::NW_021838898.1:2896924-2897424
289	LOC109416959::NW_021837136.1:29819-30319	LOC109428600::NW_021838798.1:59939375-59939875
290	LOC109428605::NW_021837045.1:87416681-87417181	LOC109397588::NW_021838576.1:59325455-59325955
291	LOC109422496::NW_021837290.1:1578823-1579323	LOC109428631::NW_021838576.1:108283596-108284096
292	LOC109428661::NW_021838576.1:85593678-85594178	LOC109422469::NW_021838576.1:109503941-109504441
293	LOC109424276::NW_021837634.1:366946-367446	LOC109428705::NW_021838576.1:81990446-81990946
294	LOC109424533::NW_021838554.1:4918092-4918592	LOC109428758::NW_021838719.1:89971-90471
295	LOC109397781::NW_021837223.1:29748-30248	LOC109428784::NW_021838554.1:2915324-2915824
296	LOC109428787::NW_021837223.1:61896-62396	LOC109405081::NW_021838554.1:2934716-2935216
297	LOC109428946::NW_021838465.1:7255275-7255775	LOC109408734::NW_021838465.1:11148624-11149124
298	LOC109408740::NW_021838465.1:6867518-6868018	LOC109428952::NW_021838465.1:10791947-10792447
299	LOC109408744::NW_021838465.1:6825622-6826122	LOC109428955::NW_021838465.1:10710799-10711299
300	LOC109429132::NW_021837267.1:32813369-32813869	LOC109409019::NW_021837267.1:33586864-33587364
301	LOC109398801::NW_021837267.1:24751612-24752112	LOC109429182::NW_021837267.1:28343199-28343699
302	LOC109398849::NW_021837267.1:24101506-24102006	LOC109429201::NW_021838544.1:576461-576961
303	LOC109398783::NW_021837267.1:19686737-19687237	LOC109429211::NW_021837267.1:23427146-23427646
304	LOC109400865::NW_021837711.1:2512828-2513328	LOC109429309::NW_021839130.1:24919294-24919794
305	LOC109409623::NW_021838399.1:6636804-6637304	LOC109429367::NW_021838399.1:9529097-9529597
306	LOC109409635::NW_021838399.1:11557773-11558273	LOC109429378::NW_021838399.1:12417631-12418131
307	LOC109425117::NW_021838399.1:11835632-11836132	LOC109429380::NW_021838399.1:12753741-12754241
308	LOC109429382::NW_021838399.1:11842823-11843323	LOC109425118::NW_021838399.1:12762636-12763136
309	LOC109429459::NW_021838687.1:36379297-36379797	LOC109420651::NW_021838687.1:42266797-42267297
310	LOC109429485::NW_021837045.1:40070986-40071486	LOC109415726::NW_021838786.1:12039-12539
311	LOC109406840::NW_021837045.1:39132766-39133266	LOC109429498::NW_021837045.1:43778502-43779002
312	LOC109429586::NW_021837378.1:8420327-8420827	LOC109408551::NW_021838031.1:36226-36726
313	LOC109406510::NW_021837378.1:2016503-2017003	LOC109429657::NW_021837378.1:14425775-14426275
314	LOC109408549::NW_021837378.1:8490579-8491079	LOC109429717::NW_021838031.1:111704-112204
315	LOC109429745::NW_021837378.1:11105234-11105734	LOC109397937::NW_021838289.1:196115-196615
316	LOC109429844::NW_021837378.1:30031668-30032168	LOC109398308::NW_021838387.1:324779-325279
317	LOC109416368::NW_021838432.1:6453506-6454006	LOC109430001::NW_021838432.1:7538394-7538894
318	LOC109414744::NW_021838432.1:8701280-8701780	LOC109430018::NW_021838432.1:10251080-10251580
319	LOC109416351::NW_021838432.1:8222201-8222701	LOC109430024::NW_021838432.1:11191295-11191795
320	LOC109416369::NW_021838432.1:6437062-6437562	LOC109430044::NW_021838432.1:7508022-7508522
321	LOC109430219::NW_021838909.1:2467668-2468168	LOC109410077::NW_021838909.1:3856558-3857058
322	LOC109430451::NW_021837045.1:142435311-142435811	LOC109409570::NW_021837045.1:142652408-142652908
323	LOC109409590::NW_021837045.1:145547232-145547732	LOC109430464::NW_021837045.1:146599855-146600355
324	LOC109430468::NW_021837045.1:143517296-143517796	LOC109409582::NW_021837045.1:144954153-144954653
325	LOC109430515::NW_021838405.1:875236-875736	LOC109428430::NW_021838798.1:68492031-68492531
326	LOC109430611::NW_021838576.1:68271822-68272322	LOC109423808::NW_021838576.1:69185992-69186492
327	LOC109430692::NW_021838909.1:8228208-8228708	LOC109430644::NW_021838925.1:63668-64168
328	LOC109430697::NW_021837489.1:14208978-14209478	LOC109405778::NW_021838687.1:20194091-20194591
329	LOC109423072::NW_021837445.1:1558-2058	LOC109430697::NW_021837489.1:14208978-14209478
330	LOC109429975::NW_021838909.1:6729005-6729505	LOC109430704::NW_021838909.1:10328444-10328944
331	LOC109429778::NW_021838153.1:110798950-110799450	LOC109430728::NW_021838909.1:8375166-8375666
332	LOC109424178::NW_021837600.1:19826202-19826702	LOC109430803::NW_021837600.1:20173585-20174085
333	LOC109424174::NW_021837600.1:20304639-20305139	LOC109430812::NW_021837600.1:23117555-23118055
334	LOC109424156::NW_021837600.1:15916083-15916583	LOC109430835::NW_021837600.1:16494021-16494521
335	LOC109430836::NW_021837600.1:16063236-16063736	LOC109424150::NW_021837600.1:16641995-16642495
336	LOC109430840::NW_021838854.1:3364618-3365118	LOC109402721::NW_021839130.1:43678040-43678540
337	LOC109430882::NW_021838542.1:552871-553371	LOC109427356::NW_021838603.1:449224-449724
338	LOC109412105::NW_021838542.1:481188-481688	LOC109430926::NW_021838603.1:362919-363419
339	LOC109430936::NW_021838542.1:419379-419879	LOC109412106::NW_021838603.1:300775-301275
340	LOC109412111::NW_021838542.1:384102-384602	LOC109430943::NW_021838603.1:276669-277169
341	LOC109412112::NW_021838542.1:355088-355588	LOC109430953::NW_021838603.1:245044-245544
342	LOC109431002::NW_021838042.1:13767424-13767924	LOC109404231::NW_021838042.1:17640225-17640725
343	LOC109412120::NW_021838542.1:205980-206480	LOC109431022::NW_021838603.1:50847-51347
344	LOC109415837::NW_021838798.1:80574487-80574987	LOC109431177::NW_021838798.1:92689520-92690020
345	LOC109420122::NW_021837931.1:18665926-18666426	LOC109431192::NW_021837931.1:18677075-18677575
346	LOC109431228::NW_021837931.1:18202912-18203412	LOC109431225::NW_021837931.1:18246788-18247288
347	LOC109431254::NW_021837931.1:13733771-13734271	LOC109407701::NW_021838847.1:101642-102142
348	LOC109427757::NW_021837156.1:49677537-49678037	LOC109431346::NW_021837156.1:51290319-51290819
349	LOC109431537::NW_021838909.1:90292353-90292853	LOC109422419::NW_021838909.1:90666420-90666920
350	LOC109398026::NW_021838454.1:6967658-6968158	LOC109431685::NW_021838454.1:9164677-9165177
351	LOC109430942::NW_021838443.1:5838874-5839374	LOC109431686::NW_021839086.1:1430902-1431402
352	LOC109431693::NW_021838443.1:424911-425411	LOC109398056::NW_021838443.1:9685583-9686083
353	LOC109398072::NW_021838454.1:7060675-7061175	LOC109431710::NW_021838454.1:9294102-9294602
354	LOC109402951::NW_021837045.1:46291370-46291870	LOC109431763::NW_021837045.1:45838135-45838635
355	LOC109416203::NW_021838687.1:7947456-7947956	LOC109431805::NW_021838687.1:8342391-8342891
356	LOC109409735::NW_021838153.1:61168045-61168545	LOC109431917::NW_021838153.1:62372661-62373161
357	LOC109407712::NW_021837931.1:13222742-13223242	LOC109431971::NW_021837931.1:15047723-15048223
358	LOC109431292::NW_021837931.1:12551209-12551709	LOC109431990::NW_021838763.1:64432-64932
359	LOC109403972::NW_021837822.1:36043123-36043623	LOC109432032::NW_021837822.1:38800606-38801106
360	LOC109409753::NW_021838153.1:61539575-61540075	LOC109432077::NW_021838153.1:62751487-62751987
361	LOC109427086::NW_021837489.1:1796350-1796850	LOC109432083::NW_021838909.1:49577520-49578020
362	LOC109430369::NW_021838884.1:50594-51094	LOC109432116::NW_021838909.1:4818308-4818808
363	LOC109404935::NW_021837156.1:58900723-58901223	LOC109432117::NW_021838798.1:72387248-72387748
364	LOC109423475::NW_021837711.1:11046083-11046583	LOC109432146::NW_021837711.1:20018393-20018893
365	LOC109423060::NW_021838676.1:3252960-3253460	LOC109432358::NW_021837156.1:45714300-45714800
366	LOC109423064::NW_021838676.1:3119957-3120457	LOC109432360::NW_021837156.1:45193043-45193543
367	LOC109432368::NW_021837156.1:45865274-45865774	LOC109423056::NW_021838676.1:3383349-3383849
368	LOC109432529::NW_021838153.1:118068105-118068605	LOC109421433::NW_021838153.1:125076555-125077055
369	LOC109432535::NW_021838153.1:117793679-117794179	LOC109421448::NW_021838153.1:124806533-124807033
370	LOC109421440::NW_021838153.1:117970336-117970836	LOC109432537::NW_021838153.1:124978541-124979041
371	LOC109432543::NW_021838153.1:119151936-119152436	LOC109421420::NW_021838153.1:126145762-126146262
372	LOC109421451::NW_021838153.1:117740683-117741183	LOC109432557::NW_021838153.1:124757425-124757925
373	LOC109432562::NW_021838153.1:117795702-117796202	LOC109421447::NW_021838153.1:124811954-124812454
374	LOC109432569::NW_021838153.1:117973274-117973774	LOC109421437::NW_021838153.1:124981490-124981990
375	LOC109421435::NW_021838153.1:117992342-117992842	LOC109432573::NW_021838153.1:124988223-124988723
376	LOC109408421::NW_021838153.1:94857374-94857874	LOC109432577::NW_021838687.1:29720898-29721398
377	LOC109432602::NW_021837045.1:30479134-30479634	LOC109419343::NW_021837489.1:9109917-9110417
378	LOC109432765::NW_021838776.1:4203672-4204172	LOC109407890::NW_021838776.1:4336856-4337356
379	LOC109416620::NW_021837267.1:56409696-56410196	LOC109432816::NW_021837267.1:58374878-58375378
380	LOC109432818::NW_021837267.1:57489752-57490252	LOC109416607::NW_021837267.1:57829407-57829907
381	LOC109432845::NW_021837267.1:53369750-53370250	LOC109416636::NW_021837267.1:56003871-56004371
382	LOC109401369::NW_021837046.1:21923019-21923519	LOC109432873::NW_021838863.1:44590-45090
383	LOC109432956::NW_021838565.1:2581384-2581884	LOC109397684::NW_021838565.1:4509427-4509927
384	LOC109432996::NW_021838565.1:3983075-3983575	LOC109397575::NW_021838706.1:54679-55179
385	LOC109411315::NW_021837046.1:12144725-12145225	LOC109433042::NW_021837046.1:12859862-12860362
386	LOC109433068::NW_021839032.1:328800-329300	LOC109404651::NW_021839230.1:267835-268335
387	LOC109433069::NW_021839032.1:172944-173444	LOC109404652::NW_021839230.1:126293-126793
388	LOC109411275::NW_021837046.1:12063487-12063987	LOC109433070::NW_021837046.1:12674055-12674555
389	LOC109420252::NW_021837046.1:1453364-1453864	LOC109433086::NW_021837046.1:5493205-5493705
390	LOC109420215::NW_021837046.1:1979876-1980376	LOC109433090::NW_021837046.1:6179905-6180405
391	LOC109404663::NW_021839032.1:152122-152622	LOC109433130::NW_021839230.1:92364-92864
392	LOC109402266::NW_021838909.1:69349466-69349966	LOC109433171::NW_021838909.1:70832447-70832947
393	LOC109433206::NW_021838909.1:62047340-62047840	LOC109402290::NW_021838909.1:71238634-71239134
394	LOC109424435::NW_021837046.1:54720587-54721087	LOC109433263::NW_021839093.1:155675-156175
395	LOC109433264::NW_021837046.1:55028064-55028564	LOC109424282::NW_021837046.1:55431916-55432416
396	LOC109433364::NW_021837045.1:149673955-149674455	LOC109399347::NW_021837700.1:1085526-1086026
397	LOC109410673::NW_021838465.1:99074090-99074590	LOC109433510::NW_021838465.1:99087216-99087716
398	LOC109412587::NW_021839130.1:16776524-16777024	LOC109433602::NW_021839130.1:17984724-17985224
399	LOC109621263::NW_021838042.1:15364713-15365213	LOC109404201::NW_021838042.1:19249253-19249753
400	LOC109621273::NW_021838465.1:70221694-70222194	LOC109425587::NW_021838465.1:72801881-72802381
401	LOC109422856::NW_021838665.1:2278506-2279006	LOC109621280::NW_021838665.1:3436570-3437070
402	LOC109405048::NW_021837045.1:160078042-160078542	LOC109621306::NW_021837045.1:162222000-162222500
403	LOC109621310::NW_021838153.1:78495251-78495751	LOC109408584::NW_021838514.1:161920-162420
404	LOC109621320::NW_021838465.1:88711404-88711904	LOC109431564::NW_021838693.1:366304-366804
405	LOC109621579::NW_021838610.1:224788-225288	LOC109400097::NW_021838610.1:3340568-3341068
406	LOC109430841::NW_021837931.1:10044787-10045287	LOC109621615::NW_021839020.1:18883847-18884347
407	LOC109400054::NW_021837083.1:83792-84292	LOC109621621::NW_021838610.1:3672035-3672535
408	LOC109400053::NW_021837083.1:106389-106889	LOC109621622::NW_021838610.1:3701238-3701738
409	LOC109621653::NW_021838401.1:956136-956636	LOC109404547::NW_021838576.1:23305283-23305783
410	LOC109621663::NW_021838401.1:966407-966907	LOC109404547::NW_021838576.1:23305283-23305783
411	LOC109621653::NW_021838401.1:956136-956636	LOC109621663::NW_021838401.1:966407-966907
412	LOC109621664::NW_021838576.1:23384378-23384878	LOC109400639::NW_021838576.1:23401460-23401960
413	LOC109404203::NW_021838042.1:15166164-15166664	LOC109621803::NW_021838042.1:19056545-19057045
414	LOC109621654::NW_021838401.1:956788-957288	LOC109621825::NW_021838576.1:23305935-23306435
415	LOC109621915::NW_021837489.1:16186879-16187379	LOC109397422::NW_021837489.1:17748507-17749007
416	LOC109417987::NW_021838466.1:6721329-6721829	LOC109621925::NW_021838466.1:7262012-7262512
417	LOC109621931::NW_021838466.1:6857815-6858315	LOC109417993::NW_021838466.1:7369983-7370483
418	LOC109415048::NW_021838042.1:15808745-15809245	LOC109621958::NW_021838042.1:19564576-19565076
419	LOC109415051::NW_021838042.1:15969504-15970004	LOC109621961::NW_021838042.1:19747828-19748328
420	LOC109622063::NW_021837045.1:160501651-160502151	LOC109405054::NW_021837045.1:162667898-162668398
421	LOC109622097::NW_021837045.1:153652916-153653416	LOC109413927::NW_021837045.1:161584138-161584638
422	LOC109408648::NW_021838576.1:98497911-98498411	LOC109622197::NW_021838576.1:113951155-113951655
423	LOC109408643::NW_021838576.1:113676811-113677311	LOC109622200::NW_021838576.1:98549945-98550445
424	LOC109622250::NW_021838233.1:2458985-2459485	LOC109414432::NW_021838233.1:9593388-9593888
425	LOC109414455::NW_021838233.1:5978295-5978795	LOC109622262::NW_021838233.1:8370708-8371208
426	LOC109622263::NW_021838233.1:5961490-5961990	LOC109414456::NW_021838233.1:8348355-8348855
427	LOC109414462::NW_021838233.1:5802000-5802500	LOC109622267::NW_021838233.1:8179249-8179749
428	LOC109622269::NW_021838233.1:5707629-5708129	LOC109414464::NW_021838233.1:8073432-8073932
429	LOC109416440::NW_021837045.1:164908259-164908759	LOC109622371::NW_021838410.1:12230314-12230814
430	LOC109414426::NW_021838233.1:9670202-9670702	LOC109622534::NW_021838508.1:629852-630352
431	LOC109429644::NW_021837378.1:175638-176138	LOC109622651::NW_021837378.1:13301532-13302032
432	LOC109622652::NW_021837378.1:265693-266193	LOC109429646::NW_021837378.1:13388810-13389310
433	LOC109622706::NW_021838562.1:200915-201415	LOC109419960::NW_021838562.1:217736-218236
434	LOC109422857::NW_021838665.1:2253770-2254270	LOC109622707::NW_021838665.1:3420469-3420969
435	LOC109419975::NW_021838153.1:100166924-100167424	LOC109622845::NW_021838799.1:2032291-2032791
436	LOC109409074::NW_021838909.1:45572785-45573285	LOC109622975::NW_021838909.1:46300664-46301164
437	LOC109420580::NW_021837046.1:2254850-2255350	LOC109623154::NW_021837046.1:3001467-3001967
438	LOC109420635::NW_021837046.1:2121607-2122107	LOC109623155::NW_021837046.1:2850923-2851423
439	LOC109433293::NW_021838681.1:356303-356803	LOC109623165::NW_021838909.1:65427974-65428474
440	LOC109623401::NW_021837378.1:11554813-11555313	LOC109429618::NW_021838289.1:698749-699249
441	LOC115253425::NW_021838576.1:106463686-106464186	LOC109401008::NW_021838576.1:122845211-122845711
442	LOC109399541::NW_021837931.1:1533534-1534034	LOC115253429::NW_021837931.1:3543367-3543867
443	LOC115253439::NW_021837878.1:48287-48787	LOC109402206::NW_021838421.1:4806887-4807387
444	LOC115253442::NW_021838646.1:147048-147548	LOC109400309::NW_021838712.1:141933-142433
445	LOC115253475::NW_021837083.1:71071-71571	LOC109621269::NW_021838610.1:3659611-3660111
446	LOC109407510::NW_021838687.1:27545943-27546443	LOC115253476::NW_021838711.1:271900-272400
447	LOC109420509::NW_021838687.1:28195477-28195977	LOC115253476::NW_021838711.1:271900-272400
448	LOC109426017::NW_021838465.1:119879377-119879877	LOC115253491::NW_021838465.1:123715303-123715803
449	LOC109400409::NW_021837316.1:18552-19052	LOC115253495::NW_021839130.1:64744724-64745224
450	LOC109405016::NW_021837045.1:157964105-157964605	LOC115253496::NW_021837045.1:159008532-159009032
451	LOC109430035::NW_021838432.1:7879041-7879541	LOC115253499::NW_021838432.1:9463954-9464454
452	LOC115253502::NW_021838736.1:46961-47461	LOC109421066::NW_021839020.1:61928520-61929020
453	LOC115253540::NW_021837045.1:1097667-1098167	LOC109418306::NW_021838517.1:168583-169083
454	LOC109422424::NW_021838909.1:90186312-90186812	LOC115253551::NW_021838909.1:90609794-90610294
455	LOC109411630::NW_021837267.1:34938687-34939187	LOC115253574::NW_021837267.1:37390622-37391122
456	LOC115253592::NW_021838576.1:100828986-100829486	LOC109420811::NW_021838910.1:2556334-2556834
457	LOC115253599::NW_021837267.1:32595861-32596361	LOC109409022::NW_021837267.1:33342287-33342787
458	LOC115253602::NW_021837267.1:27360120-27360620	LOC109429157::NW_021837267.1:30824427-30824927
459	LOC115253605::NW_021838576.1:70879988-70880488	LOC109423771::NW_021838576.1:72193332-72193832
460	LOC115253614::NW_021838925.1:146762-147262	LOC109429778::NW_021838153.1:110798950-110799450
461	LOC115253616::NW_021838687.1:48135676-48136176	LOC109420724::NW_021838687.1:49083045-49083545
462	LOC115253648::NW_021838576.1:86750196-86750696	LOC109404269::NW_021838576.1:86902203-86902703
463	LOC109397804::NW_021838688.1:856656-857156	LOC115253654::NW_021838688.1:2794595-2795095
464	LOC115253661::NW_021838687.1:77270769-77271269	LOC109417703::NW_021838687.1:80217003-80217503
465	LOC115253664::NW_021838909.1:78247454-78247954	LOC109403404::NW_021838909.1:79745552-79746052
466	LOC109398046::NW_021837149.1:8917-9417	LOC115253668::NW_021838454.1:7781301-7781801
467	LOC109426115::NW_021838454.1:5990051-5990551	LOC115253668::NW_021838454.1:7781301-7781801
468	LOC115253670::NW_021838798.1:44224035-44224535	LOC109427533::NW_021838798.1:45261943-45262443
469	LOC109419400::NW_021838687.1:64876743-64877243	LOC115253681::NW_021838687.1:65987244-65987744
470	LOC109411639::NW_021837123.1:1589583-1590083	LOC115253690::NW_021837123.1:1883029-1883529
471	LOC115253695::NW_021837045.1:64884350-64884850	LOC109411331::NW_021837045.1:66276030-66276530
472	LOC115253717::NW_021837489.1:41409153-41409653	LOC109407901::NW_021837489.1:43920146-43920646
473	LOC115253722::NW_021838687.1:52081460-52081960	LOC109419933::NW_021838687.1:53132336-53132836
474	LOC109420733::NW_021838687.1:53771758-53772258	LOC115253722::NW_021838687.1:52081460-52081960
475	LOC109408342::NW_021838465.1:74605540-74606040	LOC115253736::NW_021838465.1:75971852-75972352
476	LOC109399713::NW_021837711.1:40728745-40729245	LOC115253738::NW_021837711.1:45632961-45633461
477	LOC109427925::NW_021838233.1:13469556-13470056	LOC115253749::NW_021838233.1:17536480-17536980
478	LOC109428244::NW_021838589.1:94330-94830	LOC115253750::NW_021838233.1:17231415-17231915
479	LOC115253750::NW_021838233.1:17231415-17231915	LOC115253749::NW_021838233.1:17536480-17536980
480	LOC109411332::NW_021837045.1:64946784-64947284	LOC115253766::NW_021837045.1:66859165-66859665
481	LOC109427070::NW_021837045.1:66336107-66336607	LOC115253766::NW_021837045.1:66859165-66859665
482	LOC115253778::NW_021838909.1:11791280-11791780	LOC109413081::NW_021838909.1:13041462-13041962
483	LOC109415839::NW_021838909.1:38576958-38577458	LOC115253781::NW_021839108.1:902777-903277
484	LOC115253783::NW_021838687.1:78719176-78719676	LOC115253661::NW_021838687.1:77270769-77271269
485	LOC109400192::NW_021837045.1:87968092-87968592	LOC115253789::NW_021837045.1:89920416-89920916
486	LOC109409579::NW_021837045.1:143229935-143230435	LOC115253790::NW_021837045.1:144665262-144665762
487	LOC109428240::NW_021838233.1:14160660-14161160	LOC115253791::NW_021838233.1:18609493-18609993
488	LOC115253815::NW_021838098.1:621792-622292	LOC109409366::NW_021838399.1:1157577-1158077
489	LOC115253820::NW_021838233.1:2100349-2100849	LOC109622253::NW_021838233.1:9295303-9295803
490	LOC109420505::NW_021838687.1:27491800-27492300	LOC115253828::NW_021838687.1:28149206-28149706
491	LOC109398973::NW_021838472.1:359317-359817	LOC115253841::NW_021838569.1:272580-273080
492	LOC109430913::NW_021837600.1:9482664-9483164	LOC115253853::NW_021837600.1:11430998-11431498
493	LOC115253880::NW_021838233.1:5598249-5598749	LOC109621255::NW_021838233.1:7965746-7966246
494	LOC115253911::NW_021838688.1:884949-885449	LOC109397811::NW_021838688.1:1701644-1702144
495	LOC115253927::NW_021838621.1:5099847-5100347	LOC109426368::NW_021838865.1:232171-232671
496	LOC109419080::NW_021838586.1:392145-392645	LOC115253928::NW_021838632.1:4109174-4109674
497	LOC115253929::NW_021838646.1:216287-216787	LOC109399667::NW_021838712.1:210037-210537
498	LOC109420559::NW_021838595.1:517670-518170	LOC115253937::NW_021838687.1:45100146-45100646
499	LOC115253950::NW_021838687.1:84273119-84273619	LOC109622164::NW_021838687.1:84582623-84583123
500	LOC109403808::NW_021838465.1:50348375-50348875	LOC115253953::NW_021838712.1:14006-14506
501	LOC115253981::NW_021838832.1:2661782-2662282	LOC109402806::NW_021838832.1:2891674-2892174
502	LOC115253986::NW_021837046.1:27333610-27334110	LOC109412376::NW_021837046.1:30909061-30909561
503	LOC115253987::NW_021838909.1:45677825-45678325	LOC109622970::NW_021838909.1:46403866-46404366
504	LOC109399999::NW_021838909.1:88202082-88202582	LOC115253992::NW_021838909.1:94251092-94251592
505	LOC109422445::NW_021838909.1:87751770-87752270	LOC115253992::NW_021838909.1:94251092-94251592
506	LOC109622882::NW_021837046.1:44627771-44628271	LOC115254005::NW_021837046.1:45118766-45119266
507	LOC115254008::NW_021837046.1:49135812-49136312	LOC109428226::NW_021838233.1:14453375-14453875
508	LOC109623304::NW_021837489.1:34052542-34053042	LOC115254011::NW_021839011.1:144985-145485
509	LOC115253667::NW_021837489.1:32788226-32788726	LOC115254011::NW_021839011.1:144985-145485
510	LOC109414327::NW_021839020.1:50834907-50835407	LOC115254012::NW_021839020.1:52400939-52401439
511	LOC115254017::NW_021839020.1:18296353-18296853	LOC109621501::NW_021839020.1:18926093-18926593
512	LOC115254025::NW_021839020.1:29177985-29178485	LOC109404870::NW_021839020.1:29506988-29507488
513	LOC115254045::NW_021837123.1:1693051-1693551	LOC109411665::NW_021837267.1:37232558-37233058
514	LOC115254049::NW_021837156.1:21490363-21490863	LOC109422772::NW_021837156.1:28068939-28069439
515	LOC109427762::NW_021837156.1:49574335-49574835	LOC115254055::NW_021837156.1:51176562-51177062
516	LOC109410890::NW_021837045.1:122919780-122920280	LOC115254065::NW_021837045.1:124575401-124575901
517	LOC115254069::NW_021837267.1:35444619-35445119	LOC109411620::NW_021837267.1:37895252-37895752
518	LOC115254071::NW_021837267.1:37012648-37013148	LOC109411640::NW_021837123.1:1480903-1481403
519	LOC115254074::NW_021837267.1:39680741-39681241	LOC109427211::NW_021837267.1:44206118-44206618
520	LOC109404470::NW_021837267.1:45271934-45272434	LOC115254076::NW_021837267.1:46330329-46330829
521	LOC109406325::NW_021837267.1:45437452-45437952	LOC115254078::NW_021837267.1:46520338-46520838
522	LOC115254094::NW_021837045.1:7505286-7505786	LOC109418203::NW_021837045.1:8912437-8912937
523	LOC115254111::NW_021837711.1:11255015-11255515	LOC109432127::NW_021837711.1:20188448-20188948
524	LOC109402036::NW_021837711.1:44961379-44961879	LOC115254114::NW_021837711.1:45182059-45182559
525	LOC109414597::NW_021837822.1:30005795-30006295	LOC115254116::NW_021837822.1:31292855-31293355
526	LOC109429591::NW_021837378.1:8506099-8506599	LOC115254140::NW_021838031.1:137885-138385
527	LOC115254141::NW_021838042.1:5455129-5455629	LOC109425181::NW_021838042.1:5886672-5887172
528	LOC109431766::NW_021837045.1:46112147-46112647	LOC115254142::NW_021837045.1:47498807-47499307
529	LOC109432528::NW_021838153.1:118004613-118005113	LOC115254154::NW_021838153.1:125011441-125011941
530	LOC115254178::NW_021837045.1:102272165-102272665	LOC109423854::NW_021837045.1:103036078-103036578
531	LOC115254198::NW_021838465.1:50780897-50781397	LOC109405470::NW_021838887.1:2201322-2201822
532	LOC109425935::NW_021838465.1:130680131-130680631	LOC115254207::NW_021838465.1:134070453-134070953
533	LOC115254217::NW_021838504.1:399720-400220	LOC109426332::NW_021838932.1:1703942-1704442
534	LOC115254230::NW_021838554.1:4980771-4981271	LOC109424538::NW_021838719.1:152374-152874
535	LOC115254243::NW_021838576.1:15381769-15382269	LOC109402733::NW_021838576.1:17621417-17621917
536	LOC115254254::NW_021838576.1:56166897-56167397	LOC109408591::NW_021838576.1:56315528-56316028
537	LOC109430605::NW_021837315.1:22412-22912	LOC115254256::NW_021838576.1:69370340-69370840
538	LOC115254261::NW_021838576.1:98594516-98595016	LOC109408640::NW_021838576.1:113728665-113729165
539	LOC109622167::NW_021838576.1:114036771-114037271	LOC115254261::NW_021838576.1:98594516-98595016
540	LOC109404375::NW_021838576.1:90431857-90432357	LOC115254264::NW_021838576.1:118337091-118337591
541	LOC109419874::NW_021838595.1:240400-240900	LOC115254266::NW_021838595.1:258039-258539
542	LOC115254293::NW_021838609.1:22602-23102	LOC109397264::NW_021838632.1:313255-313755
543	LOC115254310::NW_021838610.1:6101671-6102171	LOC109429803::NW_021838645.1:312846-313346
544	LOC115254345::NW_021838610.1:2272650-2273150	LOC109413561::NW_021839020.1:69891931-69892431
545	LOC115254485::NW_021838624.1:222745-223245	LOC109427440::NW_021838798.1:22203183-22203683
546	LOC109430395::NW_021837156.1:61036371-61036871	LOC115254515::NW_021838628.1:378750-379250
547	LOC115254517::NW_021838628.1:481966-482466	LOC109427421::NW_021838798.1:21246290-21246790
548	LOC109423210::NW_021838406.1:213505-214005	LOC115254535::NW_021838632.1:1260955-1261455
549	LOC115254603::NW_021838643.1:3210185-3210685	LOC115254604::NW_021838643.1:3213144-3213644
550	LOC115254603::NW_021838643.1:3210185-3210685	LOC115254605::NW_021838643.1:3216103-3216603
551	LOC115254604::NW_021838643.1:3213144-3213644	LOC115254605::NW_021838643.1:3216103-3216603
552	LOC109424914::NW_021837600.1:26878993-26879493	LOC115254615::NW_021838643.1:4595692-4596192
553	LOC115254659::NW_021838654.1:1947676-1948176	LOC115254660::NW_021838654.1:2009144-2009644
554	LOC109424441::NW_021838654.1:2573076-2573576	LOC115254683::NW_021838654.1:3842661-3843161
555	LOC109422349::NW_021838654.1:3758335-3758835	LOC115254695::NW_021838654.1:5067462-5067962
556	LOC109397296::NW_021838343.1:20218652-20219152	LOC115254707::NW_021838655.1:143415-143915
557	LOC115254756::NW_021838665.1:2236086-2236586	LOC109422850::NW_021838665.1:3410596-3411096
558	LOC109422853::NW_021838665.1:2239278-2239778	LOC115254779::NW_021838665.1:3413851-3414351
559	LOC109422854::NW_021838665.1:2237725-2238225	LOC115254780::NW_021838665.1:3412297-3412797
560	LOC109410801::NW_021838576.1:32805679-32806179	LOC115254797::NW_021838671.1:148075-148575
561	LOC109407442::NW_021837600.1:36010121-36010621	LOC115254860::NW_021838682.1:64818-65318
562	LOC109416681::NW_021837600.1:36178428-36178928	LOC115254863::NW_021838682.1:178170-178670
563	LOC109407398::NW_021838682.1:275490-275990	LOC115254870::NW_021838682.1:367376-367876
564	LOC115254888::NW_021838687.1:57116613-57117113	LOC109397483::NW_021838687.1:57124020-57124520
565	LOC109428093::NW_021838404.1:199054-199554	LOC115254947::NW_021838687.1:3160081-3160581
566	LOC109419911::NW_021838443.1:9256984-9257484	LOC115254960::NW_021838687.1:6319322-6319822
567	LOC115254972::NW_021838687.1:12657911-12658411	LOC115254988::NW_021838687.1:13913922-13914422
568	LOC115255001::NW_021838687.1:16142138-16142638	LOC109398259::NW_021838687.1:17184797-17185297
569	LOC109419784::NW_021838687.1:16723092-16723592	LOC115255008::NW_021838687.1:17789330-17789830
570	LOC115255011::NW_021838687.1:18384409-18384909	LOC109419784::NW_021838687.1:16723092-16723592
571	LOC115255017::NW_021838687.1:21213082-21213582	LOC109419754::NW_021838687.1:22698060-22698560
572	LOC115253936::NW_021838687.1:23542941-23543441	LOC115255044::NW_021838687.1:25331725-25332225
573	LOC115255129::NW_021838687.1:46766954-46767454	LOC115255131::NW_021838687.1:46775127-46775627
574	LOC115255161::NW_021838687.1:53195096-53195596	LOC109420569::NW_021838687.1:53831793-53832293
575	LOC115255162::NW_021838687.1:53208285-53208785	LOC109419941::NW_021838687.1:53844630-53845130
576	LOC109419932::NW_021838687.1:51987354-51987854	LOC115255165::NW_021838687.1:53713527-53714027
577	LOC109419951::NW_021838687.1:53300496-53300996	LOC115255169::NW_021838687.1:53935146-53935646
578	LOC109419958::NW_021838687.1:54582548-54583048	LOC115255172::NW_021838687.1:54988369-54988869
579	LOC115253798::NW_021838687.1:57129496-57129996	LOC115255182::NW_021838687.1:57122079-57122579
580	LOC115255181::NW_021838687.1:57114672-57115172	LOC115255182::NW_021838687.1:57122079-57122579
581	LOC115255183::NW_021838687.1:57121425-57121925	LOC109397494::NW_021838687.1:60350854-60351354
582	LOC115255183::NW_021838687.1:57121425-57121925	LOC109397504::NW_021838687.1:60343741-60344241
583	LOC109397485::NW_021838687.1:59372426-59372926	LOC115255205::NW_021838687.1:59379429-59379929
584	LOC109397477::NW_021838687.1:59376988-59377488	LOC115255206::NW_021838687.1:59383990-59384490
585	LOC115255206::NW_021838687.1:59383990-59384490	LOC109407175::NW_021838687.1:59391003-59391503
586	LOC109397478::NW_021838687.1:59380083-59380583	LOC115255207::NW_021838687.1:59387083-59387583
587	LOC109397485::NW_021838687.1:59372426-59372926	LOC115255208::NW_021838687.1:59386429-59386929
588	LOC115255205::NW_021838687.1:59379429-59379929	LOC115255208::NW_021838687.1:59386429-59386929
589	LOC115255201::NW_021838687.1:59355137-59355637	LOC115255221::NW_021838687.1:60368983-60369483
590	LOC115255223::NW_021838687.1:60366193-60366693	LOC109407186::NW_021838687.1:60373292-60373792
591	LOC115255230::NW_021838687.1:60873211-60873711	LOC109415073::NW_021838687.1:61316609-61317109
592	LOC109417757::NW_021838687.1:69379766-69380266	LOC115255285::NW_021838687.1:69667657-69668157
593	LOC109417758::NW_021838687.1:69373815-69374315	LOC115255289::NW_021838687.1:69661692-69662192
594	LOC109420013::NW_021838687.1:67808079-67808579	LOC115255289::NW_021838687.1:69661692-69662192
595	LOC115255328::NW_021838687.1:77288393-77288893	LOC109417702::NW_021838687.1:78730038-78730538
596	LOC109417704::NW_021838687.1:78236084-78236584	LOC115255343::NW_021838687.1:78671957-78672457
597	LOC115255431::NW_021838687.1:28083208-28083708	LOC109407410::NW_021838687.1:28665919-28666419
598	LOC115255204::NW_021838687.1:59375003-59375503	LOC115255469::NW_021838687.1:59382006-59382506
599	LOC115255209::NW_021838687.1:59389006-59389506	LOC115255469::NW_021838687.1:59382006-59382506
600	LOC109410239::NW_021838687.1:93164552-93165052	LOC115255525::NW_021838687.1:99030974-99031474
601	LOC109416200::NW_021838687.1:7937166-7937666	LOC115255534::NW_021838687.1:8331903-8332403
602	LOC115255622::NW_021838688.1:870989-871489	LOC109405346::NW_021838688.1:2820744-2821244
603	LOC109405351::NW_021838688.1:649542-650042	LOC115255632::NW_021838688.1:1467995-1468495
604	LOC109405342::NW_021838688.1:1305702-1306202	LOC115255641::NW_021838688.1:2063774-2064274
605	LOC115255642::NW_021838688.1:2613429-2613929	LOC109405351::NW_021838688.1:649542-650042
606	LOC109405354::NW_021838688.1:1053751-1054251	LOC115255646::NW_021838688.1:2952194-2952694
607	LOC109413635::NW_021837600.1:18703564-18704064	LOC115255658::NW_021838688.1:831796-832296
608	LOC115255686::NW_021838694.1:76493-76993	LOC109402290::NW_021838909.1:71238634-71239134
609	LOC109412205::NW_021838699.1:1172032-1172532	LOC115255706::NW_021838699.1:1238183-1238683
610	LOC115255855::NW_021838719.1:306046-306546	LOC109424538::NW_021838719.1:152374-152874
611	LOC109403694::NW_021838721.1:2425950-2426450	LOC115255897::NW_021838721.1:2348190-2348690
612	LOC109414137::NW_021837267.1:21238101-21238601	LOC115255905::NW_021838723.1:71834-72334
613	LOC115255379::NW_021838687.1:82914112-82914612	LOC115256013::NW_021838743.1:3133194-3133694
614	LOC109408992::NW_021838743.1:24055-24555	LOC115256017::NW_021838743.1:3939367-3939867
615	LOC109414079::NW_021838754.1:318617-319117	LOC115256087::NW_021838754.1:889234-889734
616	LOC109414080::NW_021838754.1:355252-355752	LOC115256088::NW_021838754.1:917927-918427
617	LOC115256057::NW_021838753.1:248506-249006	LOC115256168::NW_021838765.1:3387948-3388448
618	LOC109423289::NW_021838576.1:67343307-67343807	LOC115256200::NW_021838776.1:3346527-3347027
619	LOC115256255::NW_021838787.1:172742-173242	LOC109410820::NW_021838395.1:900772-901272
620	LOC115256256::NW_021838787.1:184056-184556	LOC109410819::NW_021838395.1:916074-916574
621	LOC109430093::NW_021838798.1:60832095-60832595	LOC115256340::NW_021838798.1:61775991-61776491
622	LOC115256387::NW_021838798.1:21171800-21172300	LOC109413561::NW_021839020.1:69891931-69892431
623	LOC115256435::NW_021837046.1:4635790-4636290	LOC109401747::NW_021838153.1:60102012-60102512
624	LOC115256527::NW_021838798.1:27774675-27775175	LOC115256568::NW_021838798.1:28494597-28495097
625	LOC115256597::NW_021838798.1:43703611-43704111	LOC109427548::NW_021838798.1:42899076-42899576
626	LOC109411294::NW_021837046.1:8706229-8706729	LOC115256606::NW_021837046.1:9489667-9490167
627	LOC115256616::NW_021838798.1:62961162-62961662	LOC115253775::NW_021838798.1:63865917-63866417
628	LOC115255630::NW_021838688.1:1327859-1328359	LOC115256618::NW_021837046.1:9849951-9850451
629	LOC115256674::NW_021838798.1:23630628-23631128	LOC115256547::NW_021838798.1:23634353-23634853
630	LOC115256666::NW_021837046.1:10376527-10377027	LOC115256687::NW_021837046.1:10709388-10709888
631	LOC115256721::NW_021838798.1:27786265-27786765	LOC115256724::NW_021838798.1:28523048-28523548
632	LOC115256787::NW_021838798.1:76099270-76099770	LOC109408146::NW_021839153.1:1227258-1227758
633	LOC115256864::NW_021838798.1:94430218-94430718	LOC115253826::NW_021838798.1:94972223-94972723
634	LOC115256865::NW_021837046.1:14528310-14528810	LOC109432892::NW_021837046.1:16394907-16395407
635	LOC109418021::NW_021838153.1:100311685-100312185	LOC115256935::NW_021838799.1:2153481-2153981
636	LOC115256946::NW_021838803.1:19213-19713	LOC109420358::NW_021838909.1:53588829-53589329
637	LOC109407623::NW_021838465.1:129554606-129555106	LOC115256948::NW_021838804.1:267000-267500
638	LOC109412679::NW_021838798.1:46558590-46559090	LOC115256959::NW_021838807.1:110218-110718
639	LOC109420915::NW_021837931.1:25239836-25240336	LOC115256988::NW_021838810.1:1627846-1628346
640	LOC115257141::NW_021838851.1:93480-93980	LOC109427421::NW_021838798.1:21246290-21246790
641	LOC109422203::NW_021838503.1:52258-52758	LOC115257163::NW_021838854.1:1145846-1146346
642	LOC109414156::NW_021838621.1:5328016-5328516	LOC115257194::NW_021838865.1:466990-467490
643	LOC109414154::NW_021838621.1:5270088-5270588	LOC115257197::NW_021838865.1:416778-417278
644	LOC109414159::NW_021838621.1:5556568-5557068	LOC115257198::NW_021838865.1:829302-829802
645	LOC115257193::NW_021838865.1:78089-78589	LOC115257201::NW_021838865.1:89533-90033
646	LOC115254472::NW_021838621.1:5561676-5562176	LOC115257207::NW_021838865.1:834997-835497
647	LOC109408803::NW_021838153.1:34207605-34208105	LOC115257208::NW_021838865.1:172129-172629
648	LOC109420798::NW_021838576.1:100094770-100095270	LOC115257234::NW_021838874.1:214425-214925
649	LOC115257249::NW_021837046.1:24057525-24058025	LOC109418287::NW_021837600.1:8537061-8537561
650	LOC115257102::NW_021838843.1:3491909-3492409	LOC115257259::NW_021838881.1:32901-33401
651	LOC109415355::NW_021838687.1:60534691-60535191	LOC115257262::NW_021838882.1:27853-28353
652	LOC109429250::NW_021837045.1:19696572-19697072	LOC115257321::NW_021838896.1:3752-4252
653	LOC109622686::NW_021838684.1:416408-416908	LOC115257321::NW_021838896.1:3752-4252
654	LOC109431111::NW_021838410.1:5496529-5497029	LOC115257393::NW_021838909.1:29998659-29999159
655	LOC115257399::NW_021838909.1:61713800-61714300	LOC109433189::NW_021838909.1:70934005-70934505
656	LOC115257405::NW_021838909.1:45536050-45536550	LOC109409076::NW_021838909.1:46268608-46269108
657	LOC115257413::NW_021838909.1:7517622-7518122	LOC109430704::NW_021838909.1:10328444-10328944
658	LOC115257414::NW_021838909.1:7439033-7439533	LOC109430705::NW_021838909.1:10248017-10248517
659	LOC115257418::NW_021838909.1:69441977-69442477	LOC109433189::NW_021838909.1:70934005-70934505
660	LOC109429947::NW_021838909.1:7035175-7035675	LOC115257422::NW_021838909.1:7783991-7784491
661	LOC109403273::NW_021838909.1:40114696-40115196	LOC115257427::NW_021838909.1:40253546-40254046
662	LOC109402277::NW_021838909.1:69139389-69139889	LOC115257440::NW_021838909.1:70583054-70583554
663	LOC115257445::NW_021838909.1:78632053-78632553	LOC109403450::NW_021838909.1:80135821-80136321
664	LOC115257450::NW_021838909.1:61650701-61651201	LOC109402270::NW_021838909.1:70863444-70863944
665	LOC115257454::NW_021838909.1:78511095-78511595	LOC109403413::NW_021838909.1:80026591-80027091
666	LOC109403539::NW_021837600.1:18881535-18882035	LOC115257462::NW_021838909.1:67238097-67238597
667	LOC115257485::NW_021838909.1:78403714-78404214	LOC115257446::NW_021838909.1:79908908-79909408
668	LOC109403448::NW_021838909.1:78746426-78746926	LOC115257534::NW_021838909.1:80248254-80248754
669	LOC115257428::NW_021837046.1:29667399-29667899	LOC115257540::NW_021837046.1:32139430-32139930
670	LOC109406151::NW_021838153.1:71038447-71038947	LOC115257542::NW_021838909.1:76999657-77000157
671	LOC109414318::NW_021838343.1:6789733-6790233	LOC115257568::NW_021838909.1:1454629-1455129
672	LOC109416733::NW_021838909.1:76615927-76616427	LOC115257573::NW_021838909.1:79218816-79219316
673	LOC115257574::NW_021838909.1:2447715-2448215	LOC109410078::NW_021838909.1:3841124-3841624
674	LOC109400007::NW_021837578.1:1071032-1071532	LOC115257584::NW_021838909.1:86643241-86643741
675	LOC115257605::NW_021838909.1:19751888-19752388	LOC109422451::NW_021838754.1:57794-58294
676	LOC115257652::NW_021838909.1:2311997-2312497	LOC109430221::NW_021838909.1:3701144-3701644
677	LOC109415466::NW_021838821.1:1485723-1486223	LOC115257667::NW_021838909.1:20725632-20726132
678	LOC109418717::NW_021838576.1:95524012-95524512	LOC115257678::NW_021838909.1:77457054-77457554
679	LOC109403387::NW_021838909.1:77020753-77021253	LOC115257705::NW_021838909.1:82413452-82413952
680	LOC115257717::NW_021838909.1:32391016-32391516	LOC109415957::NW_021838909.1:33201141-33201641
681	LOC115257750::NW_021838909.1:89700289-89700789	LOC115257751::NW_021838909.1:89305685-89306185
682	LOC115257760::NW_021838909.1:61790462-61790962	LOC109433186::NW_021838909.1:69529091-69529591
683	LOC109413132::NW_021838909.1:18814945-18815445	LOC115257787::NW_021838909.1:18846700-18847200
684	LOC109408247::NW_021838832.1:1223499-1223999	LOC115257791::NW_021838909.1:41985033-41985533
685	LOC109433186::NW_021838909.1:69529091-69529591	LOC115257839::NW_021838909.1:71016309-71016809
686	LOC115257473::NW_021838909.1:77723639-77724139	LOC115257851::NW_021838909.1:77745958-77746458
687	LOC109399985::NW_021838909.1:75846436-75846936	LOC115257866::NW_021838909.1:85509965-85510465
688	LOC115257867::NW_021838909.1:85669633-85670133	LOC115254960::NW_021838687.1:6319322-6319822
689	LOC115257874::NW_021838909.1:92523066-92523566	LOC109399985::NW_021838909.1:75846436-75846936
690	LOC109402267::NW_021838909.1:69370809-69371309	LOC115257878::NW_021838909.1:70849238-70849738
691	LOC115257385::NW_021838909.1:78347724-78348224	LOC115257883::NW_021838909.1:79814807-79815307
692	LOC115257894::NW_021838909.1:69380803-69381303	LOC109402270::NW_021838909.1:70863444-70863944
693	LOC115257901::NW_021838909.1:10938103-10938603	LOC109429947::NW_021838909.1:7035175-7035675
694	LOC115257903::NW_021838909.1:2199056-2199556	LOC109410081::NW_021838909.1:3566406-3566906
695	LOC109622862::NW_021837046.1:43054188-43054688	LOC115257965::NW_021837046.1:43562352-43562852
696	LOC115257976::NW_021838910.1:1732015-1732515	LOC115257978::NW_021838910.1:2904969-2905469
697	LOC109412548::NW_021838576.1:101134057-101134557	LOC115257992::NW_021838910.1:1405227-1405727
698	LOC109412507::NW_021838910.1:1631396-1631896	LOC115257996::NW_021838910.1:2806998-2807498
699	LOC109622876::NW_021837046.1:44566465-44566965	LOC115258013::NW_021838919.1:223904-224404
700	LOC115258029::NW_021838921.1:3134806-3135306	LOC115258030::NW_021838921.1:3150963-3151463
701	LOC115257989::NW_021837046.1:43413198-43413698	LOC115258081::NW_021837046.1:43930053-43930553
702	LOC109397783::NW_021838554.1:2586659-2587159	LOC115258128::NW_021838938.1:219503-220003
703	LOC109411177::NW_021838432.1:708661-709161	LOC115258177::NW_021838948.1:148331-148831
704	LOC115258223::NW_021838965.1:2074887-2075387	LOC109621765::NW_021839020.1:1516953-1517453
705	LOC109423521::NW_021837489.1:21212422-21212922	LOC115258234::NW_021838969.1:23797-24297
706	LOC115258243::NW_021837046.1:48513229-48513729	LOC109622896::NW_021837046.1:49503920-49504420
707	LOC115258275::NW_021838976.1:1270627-1271127	LOC109406378::NW_021838976.1:1933816-1934316
708	LOC109405306::NW_021838976.1:1428455-1428955	LOC115258289::NW_021838976.1:2092067-2092567
709	LOC115258276::NW_021838976.1:1337829-1338329	LOC115258291::NW_021838976.1:1991498-1991998
710	LOC115258466::NW_021839020.1:36846922-36847422	LOC109407264::NW_021839020.1:39432269-39432769
711	LOC109410837::NW_021838477.1:2791257-2791757	LOC115258482::NW_021839020.1:46968081-46968581
712	LOC115255196::NW_021838687.1:11506222-11506722	LOC115258482::NW_021839020.1:46968081-46968581
713	LOC115255524::NW_021838687.1:97922840-97923340	LOC115258482::NW_021839020.1:46968081-46968581
714	LOC109405884::NW_021839020.1:43057935-43058435	LOC115258484::NW_021839020.1:47587665-47588165
715	LOC115258464::NW_021837046.1:49528634-49529134	LOC115258518::NW_021837046.1:49897539-49898039
716	LOC109397524::NW_021837489.1:7546338-7546838	LOC115258553::NW_021839020.1:14177242-14177742
717	LOC109421041::NW_021838736.1:48729-49229	LOC115258570::NW_021839020.1:61930640-61931140
718	LOC115258587::NW_021839020.1:30962704-30963204	LOC109404870::NW_021839020.1:29506988-29507488
719	LOC109419106::NW_021837523.1:667702-668202	LOC115258589::NW_021839020.1:5530120-5530620
720	LOC115258600::NW_021839020.1:18274917-18275417	LOC109397528::NW_021839020.1:18897307-18897807
721	LOC115258602::NW_021839020.1:1214641-1215141	LOC109409328::NW_021839020.1:5360277-5360777
722	LOC109407248::NW_021839020.1:50589588-50590088	LOC115258624::NW_021839020.1:52214325-52214825
723	LOC109409302::NW_021839020.1:4041371-4041871	LOC115258653::NW_021839020.1:8162293-8162793
724	LOC109414334::NW_021839020.1:53142586-53143086	LOC115258667::NW_021839020.1:54396681-54397181
725	LOC115258683::NW_021839020.1:34833027-34833527	LOC109398683::NW_021839020.1:31470947-31471447
726	LOC115258689::NW_021837046.1:54673149-54673649	LOC109424450::NW_021839093.1:90279-90779
727	LOC115258702::NW_021839020.1:29975069-29975569	LOC109398683::NW_021839020.1:31470947-31471447
728	LOC115258706::NW_021839020.1:57376489-57376989	LOC109408505::NW_021838637.1:223170-223670
729	LOC109397515::NW_021837045.1:171644599-171645099	LOC115258799::NW_021839020.1:76041912-76042412
730	LOC109414323::NW_021839020.1:50819398-50819898	LOC115258805::NW_021839020.1:52362070-52362570
731	LOC109417522::NW_021839020.1:79079991-79080491	LOC115258845::NW_021839020.1:79243251-79243751
732	LOC109410213::NW_021839020.1:79651614-79652114	LOC115258890::NW_021839020.1:80206069-80206569
733	LOC109417526::NW_021839020.1:79628965-79629465	LOC115258892::NW_021839020.1:80182224-80182724
734	LOC115258940::NW_021839020.1:23043187-23043687	LOC109418447::NW_021839020.1:27034621-27035121
735	LOC115259068::NW_021839032.1:837368-837868	LOC109433025::NW_021839230.1:985515-986015
736	LOC115259076::NW_021839032.1:393546-394046	LOC109433120::NW_021839230.1:362223-362723
737	LOC109432222::NW_021837711.1:12853026-12853526	LOC115259336::NW_021839103.1:77174-77674
738	LOC109409509::NW_021837046.1:56951476-56951976	LOC115259368::NW_021839119.1:467630-468130
739	LOC115259394::NW_021837046.1:17549354-17549854	LOC115259399::NW_021837046.1:17562055-17562555
740	LOC115259406::NW_021839130.1:54100483-54100983	LOC109403762::NW_021838510.1:2655259-2655759
741	LOC115259426::NW_021837046.1:21577979-21578479	LOC109413165::NW_021837600.1:46946949-46947449
742	LOC115259459::NW_021839130.1:59667884-59668384	LOC115259462::NW_021839130.1:61107525-61108025
743	LOC109412731::NW_021839130.1:59501078-59501578	LOC115259469::NW_021839130.1:60983881-60984381
744	LOC109420821::NW_021839130.1:39378510-39379010	LOC115259507::NW_021839130.1:39388255-39388755
745	LOC115259526::NW_021839130.1:8577307-8577807	LOC109417118::NW_021839130.1:8994473-8994973
746	LOC115259581::NW_021839130.1:24858373-24858873	LOC115259582::NW_021839130.1:24858373-24858873
747	LOC115259586::NW_021839130.1:51313945-51314445	LOC115259587::NW_021839130.1:51319404-51319904
748	LOC109411878::NW_021838449.1:709658-710158	LOC115259631::NW_021839130.1:61639496-61639996
749	LOC109403741::NW_021839130.1:8600342-8600842	LOC115259632::NW_021839130.1:9015894-9016394
750	LOC115259653::NW_021839130.1:39811489-39811989	LOC109415613::NW_021839130.1:38797173-38797673
751	LOC109399005::NW_021839130.1:30922072-30922572	LOC115259774::NW_021839130.1:34335701-34336201
752	LOC109411857::NW_021839130.1:59480860-59481360	LOC115259782::NW_021839130.1:60963279-60963779
753	LOC115259977::NW_021839163.1:125138-125638	LOC109420798::NW_021838576.1:100094770-100095270
754	LOC109423256::NW_021837545.1:520321-520821	LOC115259992::NW_021839165.1:128142-128642
755	LOC109403762::NW_021838510.1:2655259-2655759	LOC115260043::NW_021839185.1:141264-141764
756	LOC109416242::NW_021839076.1:1569978-1570478	LOC115260067::NW_021839193.1:123051-123551
757	LOC115260072::NW_021839197.1:1524594-1525094	LOC109429222::NW_021839197.1:1682423-1682923
758	LOC115260194::NW_021837069.1:1089179-1089679	LOC109433615::NW_021838798.1:77513957-77514457
759	LOC115260215::NW_021837080.1:536865-537365	LOC115256572::NW_021838798.1:74439739-74440239
760	LOC115260390::NW_021837131.1:89642-90142	LOC109400102::NW_021838610.1:2205481-2205981
761	LOC109432360::NW_021837156.1:45193043-45193543	LOC115260541::NW_021837156.1:45539979-45540479
762	LOC115260550::NW_021837156.1:54439776-54440276	LOC109431502::NW_021837156.1:57184330-57184830
763	LOC109422989::NW_021837156.1:1491206-1491706	LOC115260566::NW_021837156.1:1784954-1785454
764	LOC115260570::NW_021837156.1:2146828-2147328	LOC109422977::NW_021837156.1:2720249-2720749
765	LOC115260579::NW_021837156.1:3746963-3747463	LOC109403575::NW_021837156.1:4853937-4854437
766	LOC115260580::NW_021837156.1:3954043-3954543	LOC109422955::NW_021837156.1:5086473-5086973
767	LOC115260601::NW_021837156.1:15565096-15565596	LOC115260602::NW_021837156.1:15752795-15753295
768	LOC115260604::NW_021837156.1:16240124-16240624	LOC109400902::NW_021837156.1:24522353-24522853
769	LOC115260605::NW_021837156.1:16484657-16485157	LOC109400931::NW_021837156.1:24746078-24746578
770	LOC115260620::NW_021837156.1:20533820-20534320	LOC109422800::NW_021837156.1:21061928-21062428
771	LOC115260621::NW_021837156.1:20619737-20620237	LOC109421820::NW_021837156.1:21129891-21130391
772	LOC109422801::NW_021837156.1:20518691-20519191	LOC115260628::NW_021837156.1:21043842-21044342
773	LOC115260640::NW_021837045.1:59474263-59474763	LOC115260643::NW_021837045.1:59509854-59510354
774	LOC109424901::NW_021837156.1:34617420-34617920	LOC115260679::NW_021837156.1:40880118-40880618
775	LOC115260692::NW_021837156.1:45357022-45357522	LOC109432358::NW_021837156.1:45714300-45714800
776	LOC109431337::NW_021837156.1:49608020-49608520	LOC115260720::NW_021837156.1:51199311-51199811
777	LOC115260722::NW_021837156.1:51779183-51779683	LOC109419911::NW_021838443.1:9256984-9257484
778	LOC115260722::NW_021837156.1:51779183-51779683	LOC115254960::NW_021838687.1:6319322-6319822
779	LOC115260724::NW_021837156.1:53159956-53160456	LOC109406370::NW_021838554.1:5041762-5042262
780	LOC115260727::NW_021837156.1:54321391-54321891	LOC109427648::NW_021837156.1:57034616-57035116
781	LOC109431461::NW_021837156.1:54140842-54141342	LOC115260727::NW_021837156.1:54321391-54321891
782	LOC115260728::NW_021837156.1:55046975-55047475	LOC109427689::NW_021838184.1:1054810-1055310
783	LOC115260788::NW_021837045.1:83854213-83854713	LOC115257381::NW_021838909.1:80134439-80134939
784	LOC115260806::NW_021837166.1:85325-85825	LOC115257388::NW_021838909.1:83051680-83052180
785	LOC115260811::NW_021837168.1:1278662-1279162	LOC109402413::NW_021837168.1:700307-700807
786	LOC115260869::NW_021837190.1:1072405-1072905	LOC115260870::NW_021837190.1:1075048-1075548
787	LOC115260901::NW_021837045.1:92260173-92260673	LOC115260907::NW_021837045.1:92265299-92265799
788	LOC115260849::NW_021837045.1:88418305-88418805	LOC115260912::NW_021837045.1:93348940-93349440
789	LOC109412969::NW_021837156.1:36227778-36228278	LOC115260961::NW_021837212.1:1480617-1481117
790	LOC115260999::NW_021837234.1:257080-257580	LOC115261002::NW_021837234.1:442497-442997
791	LOC115261045::NW_021837245.1:979049-979549	LOC115255079::NW_021838687.1:32760804-32761304
792	LOC115261046::NW_021837248.1:50012-50512	LOC109421452::NW_021838153.1:117683916-117684416
793	LOC115261070::NW_021837259.1:40237-40737	LOC109431629::NW_021838443.1:6180134-6180634
794	LOC115261107::NW_021837267.1:4222705-4223205	LOC109406119::NW_021837267.1:4982328-4982828
795	LOC109406123::NW_021837267.1:4232876-4233376	LOC115261111::NW_021837267.1:4993267-4993767
796	LOC115261146::NW_021837045.1:114213712-114214212	LOC115254303::NW_021838610.1:698335-698835
797	LOC109428134::NW_021837123.1:1439377-1439877	LOC115261161::NW_021837267.1:36973663-36974163
798	LOC109401786::NW_021837267.1:4380762-4381262	LOC115261213::NW_021837267.1:5119313-5119813
799	LOC109621522::NW_021837267.1:6423343-6423843	LOC115261229::NW_021837267.1:6485796-6486296
800	LOC115261230::NW_021837267.1:6446147-6446647	LOC115261229::NW_021837267.1:6485796-6486296
801	LOC115261231::NW_021837267.1:6478689-6479189	LOC115261229::NW_021837267.1:6485796-6486296
802	LOC109621522::NW_021837267.1:6423343-6423843	LOC115261232::NW_021837267.1:6503603-6504103
803	LOC115261229::NW_021837267.1:6485796-6486296	LOC115261232::NW_021837267.1:6503603-6504103
804	LOC115261230::NW_021837267.1:6446147-6446647	LOC115261232::NW_021837267.1:6503603-6504103
805	LOC115261231::NW_021837267.1:6478689-6479189	LOC115261232::NW_021837267.1:6503603-6504103
806	LOC115261233::NW_021837267.1:6453247-6453747	LOC115261229::NW_021837267.1:6485796-6486296
807	LOC115261233::NW_021837267.1:6453247-6453747	LOC115261232::NW_021837267.1:6503603-6504103
808	LOC115261234::NW_021837267.1:6385807-6386307	LOC115261229::NW_021837267.1:6485796-6486296
809	LOC115261234::NW_021837267.1:6385807-6386307	LOC115261232::NW_021837267.1:6503603-6504103
810	LOC109417477::NW_021837267.1:6474420-6474920	LOC115261249::NW_021837267.1:6557279-6557779
811	LOC115261239::NW_021837267.1:6441912-6442412	LOC115261249::NW_021837267.1:6557279-6557779
812	LOC115261240::NW_021837267.1:6490445-6490945	LOC115261249::NW_021837267.1:6557279-6557779
813	LOC115261241::NW_021837267.1:6499349-6499849	LOC115261249::NW_021837267.1:6557279-6557779
814	LOC115261242::NW_021837267.1:6550165-6550665	LOC115261249::NW_021837267.1:6557279-6557779
815	LOC115261243::NW_021837267.1:6481552-6482052	LOC115261249::NW_021837267.1:6557279-6557779
816	LOC115261244::NW_021837267.1:6506466-6506966	LOC115261249::NW_021837267.1:6557279-6557779
817	LOC115261245::NW_021837267.1:6513565-6514065	LOC115261249::NW_021837267.1:6557279-6557779
818	LOC115261246::NW_021837267.1:6521011-6521511	LOC115261249::NW_021837267.1:6557279-6557779
819	LOC115261248::NW_021837267.1:6528113-6528613	LOC115261249::NW_021837267.1:6557279-6557779
820	LOC109417477::NW_021837267.1:6474420-6474920	LOC115261250::NW_021837267.1:6564389-6564889
821	LOC115261239::NW_021837267.1:6441912-6442412	LOC115261250::NW_021837267.1:6564389-6564889
822	LOC115261240::NW_021837267.1:6490445-6490945	LOC115261250::NW_021837267.1:6564389-6564889
823	LOC115261241::NW_021837267.1:6499349-6499849	LOC115261250::NW_021837267.1:6564389-6564889
824	LOC115261242::NW_021837267.1:6550165-6550665	LOC115261250::NW_021837267.1:6564389-6564889
825	LOC115261243::NW_021837267.1:6481552-6482052	LOC115261250::NW_021837267.1:6564389-6564889
826	LOC115261244::NW_021837267.1:6506466-6506966	LOC115261250::NW_021837267.1:6564389-6564889
827	LOC115261245::NW_021837267.1:6513565-6514065	LOC115261250::NW_021837267.1:6564389-6564889
828	LOC115261246::NW_021837267.1:6521011-6521511	LOC115261250::NW_021837267.1:6564389-6564889
829	LOC115261248::NW_021837267.1:6528113-6528613	LOC115261250::NW_021837267.1:6564389-6564889
830	LOC115261249::NW_021837267.1:6557279-6557779	LOC115261250::NW_021837267.1:6564389-6564889
831	LOC115261251::NW_021837267.1:6571483-6571983	LOC115261250::NW_021837267.1:6564389-6564889
832	LOC115261223::NW_021837267.1:6245719-6246219	LOC115261257::NW_021837267.1:6295587-6296087
833	LOC115261224::NW_021837267.1:6239984-6240484	LOC115261263::NW_021837267.1:6284868-6285368
834	LOC115261273::NW_021837267.1:6569573-6570073	LOC109401799::NW_021837267.1:6870409-6870909
835	LOC115261269::NW_021837267.1:6290930-6291430	LOC115261274::NW_021837267.1:6306271-6306771
836	LOC115261275::NW_021837267.1:6533653-6534153	LOC109401799::NW_021837267.1:6870409-6870909
837	LOC115261276::NW_021837267.1:6504557-6505057	LOC109401799::NW_021837267.1:6870409-6870909
838	LOC115261277::NW_021837267.1:6511656-6512156	LOC109401799::NW_021837267.1:6870409-6870909
839	LOC115261278::NW_021837267.1:6519102-6519602	LOC109401799::NW_021837267.1:6870409-6870909
840	LOC115261279::NW_021837267.1:6526204-6526704	LOC109401799::NW_021837267.1:6870409-6870909
841	LOC115261280::NW_021837267.1:6555370-6555870	LOC109401799::NW_021837267.1:6870409-6870909
842	LOC115261281::NW_021837267.1:6562480-6562980	LOC109401799::NW_021837267.1:6870409-6870909
843	LOC115261275::NW_021837267.1:6533653-6534153	LOC115261281::NW_021837267.1:6562480-6562980
844	LOC115261276::NW_021837267.1:6504557-6505057	LOC115261281::NW_021837267.1:6562480-6562980
845	LOC115261277::NW_021837267.1:6511656-6512156	LOC115261281::NW_021837267.1:6562480-6562980
846	LOC115261278::NW_021837267.1:6519102-6519602	LOC115261281::NW_021837267.1:6562480-6562980
847	LOC115261279::NW_021837267.1:6526204-6526704	LOC115261281::NW_021837267.1:6562480-6562980
848	LOC115261280::NW_021837267.1:6555370-6555870	LOC115261281::NW_021837267.1:6562480-6562980
849	LOC115261315::NW_021837267.1:12356635-12357135	LOC109403275::NW_021838563.1:241754-242254
850	LOC115261342::NW_021837267.1:19633402-19633902	LOC109429213::NW_021837267.1:23372890-23373390
851	LOC115261372::NW_021837267.1:24806485-24806985	LOC109398800::NW_021837267.1:28411864-28412364
852	LOC115261379::NW_021837045.1:134216346-134216846	LOC109400829::NW_021839130.1:17735976-17736476
853	LOC109398772::NW_021837267.1:25562023-25562523	LOC115261383::NW_021837267.1:29192545-29193045
854	LOC109398839::NW_021837267.1:25882811-25883311	LOC115261386::NW_021837267.1:29440475-29440975
855	LOC109409010::NW_021837267.1:32865274-32865774	LOC115261401::NW_021837267.1:33637192-33637692
856	LOC109427253::NW_021837123.1:193223-193723	LOC115261409::NW_021837267.1:34676620-34677120
857	LOC115261413::NW_021837267.1:35101028-35101528	LOC109427261::NW_021837267.1:37520643-37521143
858	LOC115261415::NW_021837267.1:35341622-35342122	LOC109427256::NW_021837267.1:37782974-37783474
859	LOC115261420::NW_021837267.1:36150897-36151397	LOC109411608::NW_021839070.1:164625-165125
860	LOC115261432::NW_021837267.1:37159886-37160386	LOC109622686::NW_021838684.1:416408-416908
861	LOC109411636::NW_021837123.1:1641212-1641712	LOC115261433::NW_021837267.1:37190646-37191146
862	LOC109427207::NW_021837267.1:39790873-39791373	LOC115261473::NW_021837267.1:44280440-44280940
863	LOC115261474::NW_021837267.1:45060796-45061296	LOC109406317::NW_021837267.1:45130227-45130727
864	LOC115261480::NW_021837267.1:45427501-45428001	LOC109406323::NW_021837267.1:46498389-46498889
865	LOC115261514::NW_021837267.1:50446797-50447297	LOC115259988::NW_021839164.1:1596179-1596679
866	LOC115261536::NW_021837267.1:54247049-54247549	LOC109404974::NW_021837267.1:54555419-54555919
867	LOC109404993::NW_021837267.1:54294534-54295034	LOC115261538::NW_021837267.1:54606782-54607282
868	LOC115261539::NW_021837267.1:54535303-54535803	LOC109416160::NW_021837379.1:1027030-1027530
869	LOC115261550::NW_021837267.1:55613442-55613942	LOC109416636::NW_021837267.1:56003871-56004371
870	LOC109432845::NW_021837267.1:53369750-53370250	LOC115261550::NW_021837267.1:55613442-55613942
871	LOC115261552::NW_021837267.1:55691547-55692047	LOC109432847::NW_021837267.1:56061549-56062049
872	LOC109416633::NW_021837267.1:55718889-55719389	LOC115261557::NW_021837267.1:56101896-56102396
873	LOC115261559::NW_021837267.1:56458505-56459005	LOC109416618::NW_021837267.1:58416298-58416798
874	LOC109409968::NW_021837091.1:58545-59045	LOC115261565::NW_021837267.1:57659432-57659932
875	LOC109432819::NW_021837267.1:55348406-55348906	LOC115261572::NW_021837267.1:58298105-58298605
876	LOC109416616::NW_021837267.1:56807384-56807884	LOC115261574::NW_021837267.1:58503871-58504371
877	LOC115261590::NW_021837267.1:6413847-6414347	LOC109415129::NW_021838965.1:2067000-2067500
878	LOC115261592::NW_021837267.1:6454201-6454701	LOC109401799::NW_021837267.1:6870409-6870909
879	LOC115261592::NW_021837267.1:6454201-6454701	LOC115261281::NW_021837267.1:6562480-6562980
880	LOC115261593::NW_021837267.1:6479643-6480143	LOC109401799::NW_021837267.1:6870409-6870909
881	LOC115261593::NW_021837267.1:6479643-6480143	LOC115261281::NW_021837267.1:6562480-6562980
882	LOC115261255::NW_021837267.1:6442347-6442847	LOC115261594::NW_021837267.1:6481987-6482487
883	LOC115261256::NW_021837267.1:6398217-6398717	LOC115261594::NW_021837267.1:6481987-6482487
884	LOC115261595::NW_021837267.1:6495653-6496153	LOC115261268::NW_021837267.1:6546470-6546970
885	LOC115261254::NW_021837267.1:6461923-6462423	LOC115261597::NW_021837267.1:6564824-6565324
886	LOC115261255::NW_021837267.1:6442347-6442847	LOC115261597::NW_021837267.1:6564824-6565324
887	LOC115261256::NW_021837267.1:6398217-6398717	LOC115261597::NW_021837267.1:6564824-6565324
888	LOC115261258::NW_021837267.1:6376129-6376629	LOC115261597::NW_021837267.1:6564824-6565324
889	LOC115261594::NW_021837267.1:6481987-6482487	LOC115261597::NW_021837267.1:6564824-6565324
890	LOC115261757::NW_021837294.1:67360-67860	LOC109422596::NW_021838576.1:1418549-1419049
891	LOC115261814::NW_021837045.1:183860338-183860838	LOC115260776::NW_021837156.1:19649389-19649889
892	LOC115261816::NW_021837312.1:236956-237456	LOC109414797::NW_021838600.1:119304-119804
893	LOC115261819::NW_021837045.1:19639443-19639943	LOC109413475::NW_021837256.1:1258033-1258533
894	LOC115261823::NW_021837045.1:187840138-187840638	LOC109402861::NW_021839124.1:19748-20248
895	LOC115261851::NW_021837334.1:1062687-1063187	LOC109417639::NW_021838687.1:5062086-5062586
896	LOC115262101::NW_021837378.1:9344682-9345182	LOC109429599::NW_021838031.1:966122-966622
897	LOC109406528::NW_021837378.1:1799004-1799504	LOC115262112::NW_021837378.1:14346451-14346951
898	LOC115262171::NW_021837378.1:41073729-41074229	LOC115262170::NW_021837378.1:41084091-41084591
899	LOC115262185::NW_021837378.1:47068317-47068817	LOC115262189::NW_021837378.1:47664200-47664700
900	LOC109419136::NW_021837045.1:22185567-22186067	LOC115262190::NW_021837045.1:24816383-24816883
901	LOC115262191::NW_021837378.1:49384488-49384988	LOC109411217::NW_021837378.1:49819745-49820245
902	LOC115262192::NW_021837378.1:49415088-49415588	LOC109411218::NW_021837378.1:49841445-49841945
903	LOC109411225::NW_021837378.1:49664485-49664985	LOC115262203::NW_021837378.1:50111409-50111909
904	LOC115262291::NW_021837390.1:715370-715870	LOC109428007::NW_021838605.1:395351-395851
905	LOC115262292::NW_021837390.1:1445338-1445838	LOC109427971::NW_021838707.1:133463-133963
906	LOC115262467::NW_021837467.1:736519-737019	LOC109427761::NW_021838493.1:470822-471322
907	LOC115262468::NW_021837467.1:756167-756667	LOC109427750::NW_021838493.1:570383-570883
908	LOC115262469::NW_021837467.1:821176-821676	LOC109427772::NW_021838493.1:629826-630326
909	LOC115262495::NW_021837478.1:353882-354382	LOC115257621::NW_021838909.1:25661927-25662427
910	LOC115262501::NW_021837478.1:426187-426687	LOC115257707::NW_021838909.1:25714401-25714901
911	LOC115262504::NW_021837478.1:367297-367797	LOC115257617::NW_021838909.1:25671022-25671522
912	LOC115262585::NW_021837489.1:29303709-29304209	LOC109426919::NW_021837489.1:30742366-30742866
913	LOC109623308::NW_021837489.1:32432128-32432628	LOC115262594::NW_021837489.1:33666383-33666883
914	LOC109412062::NW_021837489.1:582909-583409	LOC115262627::NW_021837489.1:2054572-2055072
915	LOC115262647::NW_021837489.1:7531940-7532440	LOC109622815::NW_021839020.1:14162714-14163214
916	LOC115262664::NW_021837489.1:18321800-18322300	LOC109404291::NW_021837489.1:18862362-18862862
917	LOC115262666::NW_021837489.1:20772516-20773016	LOC115262674::NW_021837489.1:24767998-24768498
918	LOC109404246::NW_021837489.1:19875092-19875592	LOC115262675::NW_021837489.1:23839109-23839609
919	LOC115262690::NW_021837489.1:30732914-30733414	LOC115254963::NW_021838687.1:7844712-7845212
920	LOC109623382::NW_021837489.1:32169347-32169847	LOC115262704::NW_021837489.1:33371826-33372326
921	LOC109623316::NW_021837489.1:32247514-32248014	LOC115262705::NW_021837489.1:33448804-33449304
922	LOC115262721::NW_021837489.1:35887340-35887840	LOC109401245::NW_021837489.1:39115503-39116003
923	LOC115262731::NW_021837489.1:37339508-37340008	LOC109401265::NW_021837489.1:40524755-40525255
924	LOC109401306::NW_021837489.1:36667760-36668260	LOC115262744::NW_021837489.1:39834460-39834960
925	LOC115262749::NW_021837489.1:41374914-41375414	LOC109407900::NW_021837489.1:43886575-43887075
926	LOC115262791::NW_021837489.1:11423114-11423614	LOC115255657::NW_021838688.1:539264-539764
927	LOC115262817::NW_021837489.1:35488287-35488787	LOC115262818::NW_021837489.1:35492983-35493483
928	LOC115262949::NW_021837545.1:448156-448656	LOC109423372::NW_021839165.1:35495-35995
929	LOC109418397::NW_021837045.1:11523075-11523575	LOC115262950::NW_021837045.1:14079496-14079996
930	LOC115263032::NW_021837578.1:1061090-1061590	LOC109417534::NW_021837578.1:1099538-1100038
931	LOC109413653::NW_021837867.1:14193-14693	LOC115263074::NW_021837600.1:6960811-6961311
932	LOC115263074::NW_021837600.1:6960811-6961311	LOC109426889::NW_021838643.1:5870206-5870706
933	LOC115263088::NW_021837600.1:20057779-20058279	LOC109430778::NW_021837600.1:22810113-22810613
934	LOC109430764::NW_021837600.1:20092518-20093018	LOC115263094::NW_021837600.1:22861099-22861599
935	LOC115263111::NW_021837600.1:36108101-36108601	LOC109416608::NW_021838682.1:125535-126035
936	LOC115263165::NW_021837600.1:8165743-8166243	LOC115255536::NW_021838687.1:12422801-12423301
937	LOC115263187::NW_021837600.1:13163991-13164491	LOC109430905::NW_021837600.1:14646451-14646951
938	LOC115263190::NW_021837600.1:14086427-14086927	LOC109430839::NW_021837600.1:15104763-15105263
939	LOC115263196::NW_021837600.1:15975952-15976452	LOC109424155::NW_021837600.1:16534648-16535148
940	LOC109418450::NW_021837045.1:16681608-16682108	LOC115263207::NW_021837045.1:17080208-17080708
941	LOC109430818::NW_021837600.1:16162928-16163428	LOC115263210::NW_021837600.1:16720774-16721274
942	LOC115263215::NW_021837600.1:18133676-18134176	LOC109430839::NW_021837600.1:15104763-15105263
943	LOC115263233::NW_021837600.1:20271393-20271893	LOC109430802::NW_021837600.1:23057806-23058306
944	LOC109430804::NW_021837600.1:20154951-20155451	LOC115263238::NW_021837600.1:22942221-22942721
945	LOC109430805::NW_021837600.1:20156609-20157109	LOC115263239::NW_021837600.1:22943880-22944380
946	LOC109421491::NW_021837045.1:173105020-173105520	LOC115263245::NW_021837600.1:25820601-25821101
947	LOC109415948::NW_021837600.1:26315432-26315932	LOC115263250::NW_021837600.1:27742589-27743089
948	LOC115263132::NW_021837600.1:30989274-30989774	LOC115263279::NW_021837600.1:34825835-34826335
949	LOC115263264::NW_021837600.1:32859266-32859766	LOC115263299::NW_021837600.1:39014102-39014602
950	LOC109403802::NW_021837600.1:33032127-33032627	LOC115263301::NW_021837600.1:39156336-39156836
951	LOC115263319::NW_021837600.1:46617713-46618213	LOC109415869::NW_021838810.1:1586906-1587406
952	LOC115263330::NW_021837600.1:2182119-2182619	LOC109418596::NW_021838153.1:17907-18407
953	LOC115263343::NW_021837600.1:9279126-9279626	LOC109397614::NW_021839166.1:109668-110168
954	LOC109430912::NW_021837600.1:9767385-9767885	LOC115263346::NW_021837600.1:10117593-10118093
955	LOC109430775::NW_021837600.1:20033744-20034244	LOC115263362::NW_021837600.1:22776956-22777456
956	LOC115263429::NW_021837623.1:1126099-1126599	LOC109399190::NW_021838153.1:96828403-96828903
957	LOC109400233::NW_021838153.1:28043-28543	LOC115263569::NW_021837689.1:951723-952223
958	LOC115263569::NW_021837689.1:951723-952223	LOC115257678::NW_021838909.1:77457054-77457554
959	LOC109397255::NW_021837711.1:2147347-2147847	LOC115263682::NW_021837711.1:2979996-2980496
960	LOC109423228::NW_021839187.1:38242-38742	LOC115263682::NW_021837711.1:2979996-2980496
961	LOC115263700::NW_021837045.1:22696048-22696548	LOC115262218::NW_021837045.1:24824375-24824875
962	LOC109425434::NW_021837379.1:119734-120234	LOC115263718::NW_021837711.1:16567488-16567988
963	LOC115263710::NW_021837711.1:13526673-13527173	LOC115263719::NW_021837711.1:16631131-16631631
964	LOC115263732::NW_021837711.1:20913377-20913877	LOC115254915::NW_021838687.1:80490336-80490836
965	LOC115263756::NW_021837711.1:31680749-31681249	LOC109401747::NW_021838153.1:60102012-60102512
966	LOC115263770::NW_021837711.1:39233381-39233881	LOC109413260::NW_021838278.1:814000-814500
967	LOC115262913::NW_021837523.1:1518684-1519184	LOC115263786::NW_021837711.1:5710039-5710539
968	LOC115263801::NW_021837711.1:15229532-15230032	LOC109422451::NW_021838754.1:57794-58294
969	LOC115263804::NW_021837711.1:15627862-15628362	LOC115255836::NW_021838715.1:73133-73633
970	LOC115263805::NW_021837711.1:15635625-15636125	LOC109621764::NW_021838715.1:80900-81400
971	LOC115263837::NW_021837711.1:15627212-15627712	LOC109415278::NW_021838715.1:72483-72983
972	LOC115263870::NW_021837045.1:26723032-26723532	LOC109415967::NW_021837045.1:27369729-27370229
973	LOC109418409::NW_021837734.1:567897-568397	LOC115263947::NW_021837734.1:727902-728402
974	LOC115263964::NW_021837747.1:6878-7378	LOC109424468::NW_021839208.1:956499-956999
975	LOC115263987::NW_021837767.1:65437-65937	LOC109427898::NW_021837767.1:844582-845082
976	LOC109402459::NW_021837822.1:2471426-2471926	LOC115264100::NW_021837822.1:3516167-3516667
977	LOC115264126::NW_021837822.1:7777259-7777759	LOC109400262::NW_021837822.1:8308984-8309484
978	LOC115264164::NW_021837822.1:13589968-13590468	LOC109411039::NW_021838555.1:130182-130682
979	LOC115264188::NW_021837045.1:30327618-30328118	LOC109419239::NW_021837045.1:30560655-30561155
980	LOC109416068::NW_021837822.1:24092128-24092628	LOC115264191::NW_021837822.1:24736084-24736584
981	LOC109424852::NW_021837822.1:30165293-30165793	LOC115264212::NW_021837822.1:31434900-31435400
982	LOC115264218::NW_021837822.1:33675833-33676333	LOC109424807::NW_021837976.1:465150-465650
983	LOC115264248::NW_021837822.1:35491724-35492224	LOC115264249::NW_021837822.1:35686101-35686601
984	LOC115264252::NW_021837822.1:35384068-35384568	LOC109413361::NW_021837822.1:35598893-35599393
985	LOC115264077::NW_021837822.1:35333753-35334253	LOC115264255::NW_021837822.1:35732860-35733360
986	LOC109413407::NW_021837822.1:35595982-35596482	LOC115264259::NW_021837822.1:35689055-35689555
987	LOC115264318::NW_021837822.1:20877363-20877863	LOC115258054::NW_021838923.1:97322-97822
988	LOC115264392::NW_021837834.1:636078-636578	LOC109432711::NW_021838465.1:8605336-8605836
989	LOC115264397::NW_021837834.1:58545-59045	LOC115255483::NW_021838687.1:66064428-66064928
990	LOC115264416::NW_021837845.1:7327-7827	LOC115256584::NW_021838798.1:75326738-75327238
991	LOC115257931::NW_021837046.1:40378269-40378769	LOC115264431::NW_021837045.1:34954875-34955375
992	LOC115264467::NW_021837045.1:36097194-36097694	LOC109397643::NW_021838518.1:511231-511731
993	LOC115264515::NW_021837931.1:30374823-30375323	LOC115264516::NW_021837931.1:30444611-30445111
994	LOC109420152::NW_021837931.1:18058363-18058863	LOC115264609::NW_021837931.1:18509333-18509833
995	LOC109420123::NW_021837931.1:18262308-18262808	LOC115264616::NW_021837931.1:18704005-18704505
996	LOC115264640::NW_021837931.1:21557467-21557967	LOC109415896::NW_021839150.1:25212-25712
997	LOC109429484::NW_021837045.1:38780184-38780684	LOC115264647::NW_021837045.1:39855406-39855906
998	LOC109412634::NW_021837931.1:25297263-25297763	LOC115264659::NW_021837931.1:25328723-25329223
999	LOC115264666::NW_021837931.1:27440574-27441074	LOC109401553::NW_021837931.1:33460016-33460516
1000	LOC109401533::NW_021837931.1:27283404-27283904	LOC115264689::NW_021837931.1:33323145-33323645
1001	LOC115264696::NW_021837931.1:35948030-35948530	LOC109422261::NW_021839153.1:1382975-1383475
1002	LOC115264719::NW_021837931.1:12368674-12369174	LOC115259745::NW_021839130.1:12188435-12188935
1003	LOC115253860::NW_021837965.1:953310-953810	LOC115264836::NW_021837965.1:1037927-1038427
1004	LOC115264857::NW_021837987.1:1091323-1091823	LOC109427513::NW_021838798.1:46806946-46807446
1005	LOC109403728::NW_021837267.1:7857689-7858189	LOC115264884::NW_021838009.1:906071-906571
1006	LOC115261296::NW_021837267.1:8435888-8436388	LOC115264884::NW_021838009.1:906071-906571
1007	LOC109429594::NW_021837378.1:8472817-8473317	LOC115264896::NW_021838031.1:88607-89107
1008	LOC109408545::NW_021837378.1:8477363-8477863	LOC115264897::NW_021838031.1:97549-98049
1009	LOC115264926::NW_021838042.1:13443888-13444388	LOC109404233::NW_021838042.1:17304676-17305176
1010	LOC109402890::NW_021837045.1:46071437-46071937	LOC115264930::NW_021837045.1:47447958-47448458
1011	LOC109431761::NW_021837045.1:46480746-46481246	LOC115264930::NW_021837045.1:47447958-47448458
1012	LOC115264933::NW_021838042.1:16763640-16764140	LOC109414031::NW_021838383.1:179650-180150
1013	LOC115264925::NW_021838042.1:12867468-12867968	LOC115264933::NW_021838042.1:16763640-16764140
1014	LOC109404215::NW_021838042.1:14938245-14938745	LOC115264937::NW_021838042.1:18735636-18736136
1015	LOC109621934::NW_021838042.1:15075164-15075664	LOC115264939::NW_021838042.1:18930611-18931111
1016	LOC115264991::NW_021838042.1:2562630-2563130	LOC115259319::NW_021839097.1:894774-895274
1017	LOC115265004::NW_021838042.1:17719893-17720393	LOC115259745::NW_021839130.1:12188435-12188935
1018	LOC109425728::NW_021837545.1:522284-522784	LOC115265017::NW_021838043.1:448220-448720
1019	LOC115265065::NW_021838076.1:648156-648656	LOC115263786::NW_021837711.1:5710039-5710539
1020	LOC115265071::NW_021838076.1:1043951-1044451	LOC109403110::NW_021838576.1:91779478-91779978
1021	LOC115265072::NW_021838076.1:1045226-1045726	LOC109403093::NW_021838576.1:91780680-91781180
1022	LOC115265099::NW_021838109.1:271896-272396	LOC109398688::NW_021838109.1:566444-566944
1023	LOC115265120::NW_021838142.1:190639-191139	LOC109422632::NW_021838599.1:584257-584757
1024	LOC115260638::NW_021837045.1:59363657-59364157	LOC115265140::NW_021838153.1:46388706-46389206
1025	LOC115263152::NW_021837600.1:2182755-2183255	LOC115265236::NW_021838153.1:18543-19043
1026	LOC115265247::NW_021838153.1:3810728-3811228	LOC109426821::NW_021838153.1:5245820-5246320
1027	LOC115264431::NW_021837045.1:34954875-34955375	LOC115265262::NW_021838153.1:13253422-13253922
1028	LOC115265268::NW_021838153.1:17187378-17187878	LOC109426668::NW_021838427.1:170890-171390
1029	LOC109426672::NW_021838153.1:16313123-16313623	LOC115265276::NW_021838153.1:18690723-18691223
1030	LOC109411811::NW_021838153.1:51673382-51673882	LOC115265357::NW_021838153.1:53240298-53240798
1031	LOC109409789::NW_021838153.1:55075585-55076085	LOC115265375::NW_021838153.1:56460678-56461178
1032	LOC115265434::NW_021837045.1:59473472-59473972	LOC109402257::NW_021838366.1:540437-540937
1033	LOC115265435::NW_021837045.1:59509063-59509563	LOC109402257::NW_021838366.1:540437-540937
1034	LOC115265434::NW_021837045.1:59473472-59473972	LOC115265435::NW_021837045.1:59509063-59509563
1035	LOC115265498::NW_021838153.1:110928041-110928541	LOC115256601::NW_021838798.1:48745379-48745879
1036	LOC115265505::NW_021837045.1:67385091-67385591	LOC115257772::NW_021838909.1:91359827-91360327
1037	LOC115265513::NW_021838153.1:117764037-117764537	LOC109432552::NW_021838153.1:124782605-124783105
1038	LOC115265515::NW_021838153.1:117924157-117924657	LOC109432548::NW_021838153.1:124940288-124940788
1039	LOC109421431::NW_021838153.1:118139705-118140205	LOC115265560::NW_021838153.1:125123667-125124167
1040	LOC109432525::NW_021838153.1:118310203-118310703	LOC115265563::NW_021838153.1:125305537-125306037
1041	LOC109432544::NW_021838153.1:118979195-118979695	LOC115265565::NW_021838153.1:125951461-125951961
1042	LOC115261182::NW_021837267.1:50594713-50595213	LOC115265579::NW_021838153.1:131662177-131662677
1043	LOC115265601::NW_021838153.1:148497137-148497637	LOC109404800::NW_021838153.1:150931563-150932063
1044	LOC115265604::NW_021838153.1:149796705-149797205	LOC109623251::NW_021838424.1:222314-222814
1045	LOC109430988::NW_021838153.1:156231853-156232353	LOC115265634::NW_021838153.1:157744167-157744667
1046	LOC115265643::NW_021838153.1:161175850-161176350	LOC115257026::NW_021838821.1:1272878-1273378
1047	LOC115265693::NW_021838153.1:17663864-17664364	LOC109426626::NW_021838153.1:18828442-18828942
1048	LOC115265694::NW_021838153.1:17669172-17669672	LOC115265698::NW_021838153.1:18833748-18834248
1049	LOC115265695::NW_021838153.1:17681043-17681543	LOC115265699::NW_021838153.1:18852259-18852759
1050	LOC109426625::NW_021838153.1:17691550-17692050	LOC115265700::NW_021838153.1:18862600-18863100
1051	LOC115265812::NW_021838153.1:120621277-120621777	LOC109421221::NW_021839087.1:82246-82746
1052	LOC115266038::NW_021838154.1:2154817-2155317	LOC109416415::NW_021838608.1:135227-135727
1053	LOC115266049::NW_021838154.1:5347997-5348497	LOC109431912::NW_021838154.1:7321642-7322142
1054	LOC115266079::NW_021838154.1:13102716-13103216	LOC115256668::NW_021838798.1:68319468-68319968
1055	LOC109422540::NW_021837987.1:577985-578485	LOC115266099::NW_021838154.1:17979707-17980207
1056	LOC109406715::NW_021837316.1:25325-25825	LOC115266121::NW_021838154.1:1306787-1307287
1057	LOC109427117::NW_021837045.1:88042450-88042950	LOC115266261::NW_021837045.1:89978501-89979001
1058	LOC115266115::NW_021837045.1:88250825-88251325	LOC115266272::NW_021837045.1:90195810-90196310
1059	LOC115266293::NW_021838233.1:3008770-3009270	LOC109414446::NW_021838233.1:3347376-3347876
1060	LOC115266296::NW_021838233.1:3272684-3273184	LOC109621322::NW_021838233.1:4147957-4148457
1061	LOC115266300::NW_021838233.1:3929017-3929517	LOC109622261::NW_021838233.1:4713524-4714024
1062	LOC115266290::NW_021838233.1:2846443-2846943	LOC115266301::NW_021838233.1:4033286-4033786
1063	LOC109621250::NW_021838233.1:5877471-5877971	LOC115266328::NW_021838233.1:8248726-8249226
1064	LOC109414457::NW_021838233.1:5940945-5941445	LOC115266329::NW_021838233.1:8322815-8323315
1065	LOC115266340::NW_021838233.1:11118079-11118579	LOC109397797::NW_021837867.1:88696-89196
1066	LOC109428229::NW_021837046.1:49075770-49076270	LOC115266356::NW_021838233.1:14393900-14394400
1067	LOC109428219::NW_021837767.1:721409-721909	LOC115266358::NW_021838233.1:14815456-14815956
1068	LOC115266359::NW_021838233.1:14912001-14912501	LOC109418804::NW_021838576.1:100012251-100012751
1069	LOC115266327::NW_021838233.1:8187871-8188371	LOC115266361::NW_021838233.1:15617977-15618477
1070	LOC115266369::NW_021838233.1:17245423-17245923	LOC109427926::NW_021838233.1:17554802-17555302
1071	LOC115266382::NW_021837045.1:87720580-87721080	LOC115259495::NW_021839130.1:16183120-16183620
1072	LOC109397797::NW_021837867.1:88696-89196	LOC115266389::NW_021838233.1:21897194-21897694
1073	LOC115266476::NW_021838278.1:1003681-1004181	LOC115266474::NW_021838278.1:1003681-1004181
1074	LOC115254173::NW_021838310.1:379306-379806	LOC115266498::NW_021838310.1:416981-417481
1075	LOC109417111::NW_021838332.1:668261-668761	LOC115266522::NW_021838332.1:697228-697728
1076	LOC115266549::NW_021837045.1:99735663-99736163	LOC109401328::NW_021837045.1:99923600-99924100
1077	LOC109411115::NW_021838343.1:2090374-2090874	LOC115266551::NW_021838343.1:2588169-2588669
1078	LOC109408200::NW_021837122.1:89258-89758	LOC115266567::NW_021838343.1:6351776-6352276
1079	LOC115266573::NW_021838343.1:7058130-7058630	LOC109411158::NW_021838343.1:11137486-11137986
1080	LOC115266580::NW_021838343.1:8995128-8995628	LOC109408189::NW_021839191.1:84108-84608
1081	LOC115266587::NW_021838343.1:10570034-10570534	LOC109433157::NW_021838798.1:6441644-6442144
1082	LOC109416502::NW_021838343.1:13421894-13422394	LOC115266601::NW_021838343.1:14236373-14236873
1083	LOC109416500::NW_021838343.1:12039566-12040066	LOC115266603::NW_021838343.1:13989664-13990164
1084	LOC115266623::NW_021838343.1:18843639-18844139	LOC115254827::NW_021838676.1:60412-60912
1085	LOC109416689::NW_021838343.1:12808534-12809034	LOC115266655::NW_021838343.1:13274626-13275126
1086	LOC115266664::NW_021838343.1:20267317-20267817	LOC115254705::NW_021838655.1:149610-150110
1087	LOC109416489::NW_021838343.1:14823042-14823542	LOC115266688::NW_021838343.1:14832184-14832684
1088	LOC109422516::NW_021837179.1:1826519-1827019	LOC115266694::NW_021838343.1:16598935-16599435
1089	LOC115266747::NW_021838384.1:240611-241111	LOC109417537::NW_021838390.1:235677-236177
1090	LOC115266750::NW_021838385.1:342772-343272	LOC109412528::NW_021838576.1:102279236-102279736
1091	LOC115266751::NW_021838385.1:554989-555489	LOC109420842::NW_021838576.1:102537289-102537789
1092	LOC115261556::NW_021837045.1:162807346-162807846	LOC115266783::NW_021838388.1:10384678-10385178
1093	LOC109430135::NW_021838388.1:10966862-10967362	LOC115266796::NW_021838388.1:11480020-11480520
1094	LOC115265394::NW_021838153.1:68323707-68324207	LOC115266801::NW_021838388.1:11729354-11729854
1095	LOC115266842::NW_021838391.1:608936-609436	LOC109408801::NW_021838465.1:9077038-9077538
1096	LOC109621396::NW_021838054.1:47575-48075	LOC115266862::NW_021838395.1:512529-513029
1097	LOC109410846::NW_021837723.1:1119605-1120105	LOC115266865::NW_021838395.1:625808-626308
1098	LOC115266878::NW_021838396.1:471518-472018	LOC115266879::NW_021838396.1:463431-463931
1099	LOC115266885::NW_021838396.1:455344-455844	LOC115266879::NW_021838396.1:463431-463931
1100	LOC115266912::NW_021838399.1:335450-335950	LOC109408115::NW_021838399.1:2899794-2900294
1101	LOC115266939::NW_021838399.1:11039356-11039856	LOC109425119::NW_021838399.1:12786675-12787175
1102	LOC115258573::NW_021837046.1:51716584-51717084	LOC115266960::NW_021838399.1:8776971-8777471
1103	LOC115266957::NW_021838399.1:7474872-7475372	LOC115266965::NW_021838399.1:11352004-11352504
1104	LOC115266977::NW_021838401.1:967059-967559	LOC109621825::NW_021838576.1:23305935-23306435
1105	LOC115266987::NW_021838404.1:93987-94487	LOC109427537::NW_021838687.1:3043020-3043520
1106	LOC115267077::NW_021838410.1:11075309-11075809	LOC109399946::NW_021838410.1:11849608-11850108
1107	LOC115267130::NW_021837045.1:116462310-116462810	LOC109425563::NW_021837045.1:117161203-117161703
1108	LOC109411254::NW_021837045.1:115987485-115987985	LOC115267156::NW_021837045.1:116388506-116389006
1109	LOC115267200::NW_021838421.1:1248070-1248570	LOC109432247::NW_021838465.1:30932152-30932652
1110	LOC115267261::NW_021838423.1:639147-639647	LOC115267262::NW_021838423.1:857447-857947
1111	LOC109421032::NW_021837711.1:32532696-32533196	LOC115267334::NW_021838432.1:6545836-6546336
1112	LOC115267338::NW_021838432.1:7362262-7362762	LOC115257590::NW_021838909.1:9634504-9635004
1113	LOC115267361::NW_021838432.1:8921291-8921791	LOC115267371::NW_021838432.1:11885505-11886005
1114	LOC115267387::NW_021838432.1:8242461-8242961	LOC109429993::NW_021838432.1:9786144-9786644
1115	LOC109416385::NW_021838432.1:8306151-8306651	LOC115267390::NW_021838432.1:9864922-9865422
1116	LOC115267456::NW_021838442.1:53117-53617	LOC109421136::NW_021838465.1:58608652-58609152
1117	LOC115264714::NW_021837931.1:4003484-4003984	LOC115267465::NW_021838443.1:1438568-1439068
1118	LOC115267468::NW_021838443.1:4448626-4449126	LOC109408146::NW_021839153.1:1227258-1227758
1119	LOC109397949::NW_021837301.1:813411-813911	LOC115267489::NW_021838443.1:2862869-2863369
1120	LOC115267494::NW_021838443.1:5186740-5187240	LOC109430934::NW_021839086.1:817899-818399
1121	LOC115267476::NW_021838443.1:60910-61410	LOC115267500::NW_021838443.1:9347133-9347633
1122	LOC115267511::NW_021838443.1:3222816-3223316	LOC115258698::NW_021839020.1:7422978-7423478
1123	LOC115267516::NW_021838443.1:5155731-5156231	LOC115254031::NW_021839086.1:789025-789525
1124	LOC109397962::NW_021838443.1:176682-177182	LOC115267521::NW_021838443.1:9473778-9474278
1125	LOC115262125::NW_021837378.1:17802165-17802665	LOC115267561::NW_021838452.1:368526-369026
1126	LOC115267599::NW_021838454.1:5133134-5133634	LOC115258206::NW_021838959.1:9403-9903
1127	LOC115267609::NW_021838454.1:6993189-6993689	LOC109431688::NW_021838454.1:9185604-9186104
1128	LOC109426171::NW_021838454.1:5904739-5905239	LOC115267613::NW_021838454.1:7700587-7701087
1129	LOC109426095::NW_021838454.1:6159113-6159613	LOC115267615::NW_021838454.1:7953668-7954168
1130	LOC109401962::NW_021838465.1:1233757-1234257	LOC115267706::NW_021838465.1:2250463-2250963
1131	LOC115261199::NW_021837267.1:1172351-1172851	LOC115267724::NW_021838465.1:8675329-8675829
1132	LOC115267733::NW_021838465.1:10750166-10750666	LOC109428592::NW_021838510.1:7381805-7382305
1133	LOC109408741::NW_021838465.1:6855033-6855533	LOC115267735::NW_021838465.1:10780403-10780903
1134	LOC109414909::NW_021838465.1:6422525-6423025	LOC115267748::NW_021838465.1:15818948-15819448
1135	LOC109408711::NW_021838465.1:14029014-14029514	LOC115267751::NW_021838465.1:17889760-17890260
1136	LOC109409855::NW_021838465.1:27204697-27205197	LOC115267792::NW_021838465.1:29841818-29842318
1137	LOC109397010::NW_021838461.1:493080-493580	LOC115267809::NW_021838465.1:36060409-36060909
1138	LOC115267829::NW_021838465.1:44781342-44781842	LOC109399622::NW_021838465.1:45263342-45263842
1139	LOC109400795::NW_021838465.1:45310998-45311498	LOC115267837::NW_021838465.1:46571488-46571988
1140	LOC115267847::NW_021838465.1:50782340-50782840	LOC109402416::NW_021838887.1:2202765-2203265
1141	LOC115267848::NW_021838465.1:51206686-51207186	LOC115267849::NW_021838465.1:51650613-51651113
1142	LOC115267859::NW_021838465.1:56869246-56869746	LOC109410565::NW_021838465.1:57917969-57918469
1143	LOC115267860::NW_021838465.1:56963222-56963722	LOC109421151::NW_021838465.1:58027851-58028351
1144	LOC115267865::NW_021838465.1:61340505-61341005	LOC109414407::NW_021838465.1:61927041-61927541
1145	LOC109426534::NW_021838465.1:68264003-68264503	LOC115267881::NW_021838465.1:73360097-73360597
1146	LOC109409194::NW_021837378.1:49795859-49796359	LOC115267969::NW_021838465.1:103811098-103811598
1147	LOC115267973::NW_021838465.1:105361706-105362206	LOC115267976::NW_021838465.1:105970401-105970901
1148	LOC109410676::NW_021838465.1:105348294-105348794	LOC115267978::NW_021838465.1:105956184-105956684
1149	LOC115263792::NW_021837711.1:11584815-11585315	LOC115267982::NW_021838465.1:4383031-4383531
1150	LOC115267990::NW_021837045.1:107577707-107578207	LOC109424018::NW_021837045.1:108097350-108097850
1151	LOC115268014::NW_021838465.1:114596999-114597499	LOC109426059::NW_021838465.1:115949720-115950220
1152	LOC109426054::NW_021838465.1:116973165-116973665	LOC115268023::NW_021838465.1:118059459-118059959
1153	LOC115260698::NW_021837156.1:48351885-48352385	LOC115268026::NW_021838465.1:118528732-118529232
1154	LOC115268031::NW_021838465.1:119850374-119850874	LOC109426019::NW_021838465.1:123693798-123694298
1155	LOC109426018::NW_021838465.1:119865054-119865554	LOC115268051::NW_021838465.1:123700902-123701402
1156	LOC109426010::NW_021838465.1:120459970-120460470	LOC115268054::NW_021838465.1:124286163-124286663
1157	LOC109425973::NW_021838465.1:126013618-126014118	LOC115268086::NW_021838465.1:135029980-135030480
1158	LOC109410591::NW_021838465.1:61308233-61308733	LOC115268149::NW_021838465.1:61881710-61882210
1159	LOC115262195::NW_021837378.1:49791773-49792273	LOC115268186::NW_021838465.1:103807011-103807511
1160	LOC115268243::NW_021837045.1:142314525-142315025	LOC109409567::NW_021837045.1:142557415-142557915
1161	LOC109430621::NW_021837045.1:88677116-88677616	LOC115268271::NW_021838465.1:39787067-39787567
1162	LOC109399624::NW_021838465.1:44778790-44779290	LOC115268277::NW_021838465.1:45261049-45261549
1163	LOC109400801::NW_021838465.1:45216441-45216941	LOC115268278::NW_021838465.1:46487452-46487952
1164	LOC109410588::NW_021838153.1:665807-666307	LOC115268308::NW_021838465.1:61165565-61166065
1165	LOC109621439::NW_021837204.1:75536-76036	LOC115268350::NW_021838465.1:108623300-108623800
1166	LOC109400596::NW_021837045.1:50676714-50677214	LOC115268359::NW_021838465.1:110574273-110574773
1167	LOC115268394::NW_021838465.1:129771922-129772422	LOC109425886::NW_021838465.1:133204650-133205150
1168	LOC115268456::NW_021838466.1:1565535-1566035	LOC109407939::NW_021839186.1:1741313-1741813
1169	LOC115268493::NW_021838466.1:6217359-6217859	LOC109410420::NW_021838466.1:9224044-9224544
1170	LOC115268497::NW_021838466.1:6748204-6748704	LOC109417989::NW_021838466.1:7287171-7287671
1171	LOC115268498::NW_021838466.1:7069665-7070165	LOC109417986::NW_021839133.1:49397-49897
1172	LOC115268502::NW_021838466.1:7755115-7755615	LOC109415089::NW_021838466.1:7763654-7764154
1173	LOC115268547::NW_021838466.1:9972506-9973006	LOC109422072::NW_021838798.1:7649826-7650326
1174	LOC115268609::NW_021838477.1:5884319-5884819	LOC109402493::NW_021838477.1:7258295-7258795
1175	LOC115263778::NW_021837045.1:22875390-22875890	LOC115268620::NW_021838477.1:7741960-7742460
1176	LOC115265466::NW_021837045.1:25004256-25004756	LOC115268620::NW_021838477.1:7741960-7742460
1177	LOC115268623::NW_021838477.1:5897722-5898222	LOC109402479::NW_021838477.1:7276749-7277249
1178	LOC115268720::NW_021838488.1:4092622-4093122	LOC109418222::NW_021838488.1:5003206-5003706
1179	LOC109427995::NW_021838488.1:4266293-4266793	LOC115268733::NW_021838488.1:5175468-5175968
1180	LOC115268756::NW_021837045.1:148708620-148709120	LOC109399355::NW_021837700.1:84395-84895
1181	LOC109427674::NW_021837467.1:557195-557695	LOC115268763::NW_021838493.1:303446-303946
1182	LOC109427703::NW_021837467.1:661685-662185	LOC115268764::NW_021838493.1:415343-415843
1183	LOC115268782::NW_021838495.1:42151-42651	LOC109407094::NW_021838987.1:1296147-1296647
1184	LOC115268801::NW_021837045.1:149360422-149360922	LOC109423289::NW_021838576.1:67343307-67343807
[truncated: 145 more rows]

## Sheet: Count_3_Flanking_1000bp
Gene	Scaffold	Poistion	Times_dupicated
LOC115261250	NW_021837267.1	6564389-6565389	12
[truncated: 706 more rows]

## Sheet: scaffolds_involved_3_1000
Scaffold
[truncated: 300 more rows]

[truncated: 2 more sheets: Count_3_Flanking_500bp, sacffolds_involving_3_500bp]
