# Supplementary material for: Improved reference genome of the arboviral vector Aedes albopictus
Source: Genome Biol. 2020 Aug 26;21:215. doi: 10.1186/s13059-020-02141-w (PMC7448346; doi:10.1186/s13059-020-02141-w)
Supplement: Supplementary file 4 — Additional file 4: Database of viral species used for nrEVEs screening in AalbF2. [file 13059_2020_2141_MOESM4_ESM.xlsx]

## Sheet: DB
Additional file 4
Database of viral species used for nrEVEs screening in AalbF2
Realm	Family	Genus	Viral Species Name	Taxonomy ID
Riboviria	Alphatetraviridae	Betatetravirus	Nudaurelia capensis beta virus	85652
Riboviria	Alphatetraviridae	Omegatetravirus	Dendrolimus punctatus virus	272751
Riboviria	Alphatetraviridae	Omegatetravirus	Helicoverpa armigera stunt virus	37206
Riboviria	Birnaviridae	Entomobirnavirus	Drosophila X virus	48981
Riboviria	Carmotetraviridae	Alphacarmotetravirus	Providence virus	213633
Riboviria	Chuviridae	Mivirus	Suffolk virus	1577137
Riboviria	Chuviridae-Like	Chuviridae-Like	Hubei tombus-like virus 19	1923265
Riboviria	Chuviridae-Like	Chuviridae-Like	Hubei picorna-like virus 66	1923149
Riboviria	Chuviridae-Like	Chuviridae-Like	Hubei tombus-like virus 22	1923269
Riboviria	Chuviridae-Like	Chuviridae-Like	Beihai picorna-like virus 57	1922602
Riboviria	Chuviridae-Like	Chuviridae-Like	Beihai picorna-like virus 59	1922604
Riboviria	Chuviridae-Like	Chuviridae-Like	Wuhan insect virus 12	1923716
Riboviria	Chuviridae-Like	Chuviridae-Like	Jingmen tombus-like virus 1	1923351
Riboviria	Chuviridae-Like	Chuviridae-Like	Wuhan insect virus 22	1923726
Riboviria	Chuviridae-Like	Chuviridae-Like	Wuhan cricket virus 2	1923697
Riboviria	Chuviridae-Like	Chuviridae-Like	Hubei myriapoda virus 9	1922938
Riboviria	Chuviridae-Like	Chuviridae-Like	Beihai shrimp virus 3	1922669
Riboviria	Chuviridae-Like	Chuviridae-Like	Xingshan nematode virus 5	1923764
Riboviria	Chuviridae-Like	Chuviridae-Like	Xinzhou nematode virus 3	1923771
Riboviria	Chuviridae-Like	Chuviridae-Like	Wuhan pillworm virus 3	1923746
Riboviria	Chuviridae-Like	Chuviridae-Like	Wuhan insect virus 35	1923738
Riboviria	Chuviridae-Like	Chuviridae-Like	Wuhan nido-like virus 1	1923743
Riboviria	Chuviridae-Like	Chuviridae-Like	Xinzhou nematode virus 7	1923775
Riboviria	Chuviridae-Like	Chuviridae-Like	Wuhan millipede virus 3	1923742
Riboviria	Chuviridae-Like	Chuviridae-Like	Wuhan spirurian nematodes virus 1	1923759
Riboviria	Chuviridae-Like	Chuviridae-Like	Wuhan pillworm virus 2	1923745
Riboviria	Chuviridae-Like	Chuviridae-Like	Xinzhou nematode virus 2	1923770
Riboviria	Chuviridae-Like	Chuviridae-Like	Xinzhou nematode virus 1	1923769
Riboviria	Chuviridae-Like	Chuviridae-Like	Xingshan nematode virus 2	1923761
Riboviria	Chuviridae-Like	Chuviridae-Like	Wuhan insect virus 33	1923736
Riboviria	Chuviridae-Like	Chuviridae-Like	Ubei picorna-like virus 3	1923781
Riboviria	Chuviridae-Like	Chuviridae-Like	Xingshan nematode virus 6	1923765
Riboviria	Chuviridae-Like	Chuviridae-Like	Wuhan spider virus 3	1923752
Riboviria	Chuviridae-Like	Chuviridae-Like	Wuhan spider virus 4	1923753
Riboviria	Chuviridae-Like	Chuviridae-Like	Zhejiang mosquito virus 1	1923778
Riboviria	Chuviridae-Like	Chuviridae-Like	Wuhan spider virus 5	1923754
Riboviria	Chuviridae-Like	Chuviridae-Like	Wuhan insect virus 34	1923737
Riboviria	Chuviridae-Like	Chuviridae-Like	Wuhan spider virus 6	1923755
Riboviria	Chuviridae-Like	Chuviridae-Like	Wuhan spider virus 8	1923757
Riboviria	Chuviridae-Like	Chuviridae-Like	Wuhan insect virus 9	1923740
Riboviria	Chuviridae-Like	Chuviridae-Like	Wuhan spider virus 9	1923758
Riboviria	Chuviridae-Like	Chuviridae-Like	Wuhan poty-like virus 1	1923748
Riboviria	Chuviridae-Like	Chuviridae-Like	Wuhan insect virus 8	1923739
Riboviria	Chuviridae-Like	Chuviridae-Like	Xinzhou nematode virus 5	1923773
Riboviria	Chuviridae-Like	Chuviridae-Like	Xinzhou dimarhabdovirus virus 1	1923768
Riboviria	Chuviridae-Like	Chuviridae-Like	Wuhan spider virus 7	1923756
Riboviria	Chuviridae-Like	Chuviridae-Like	Jingmen tombus-like virus 2	1938656
Riboviria	Chuviridae-Like	Chuviridae-Like	Wuhan insect virus 21	1923725
Riboviria	Chuviridae-Like	Chuviridae-Like	Wuhan insect virus 15	1923719
Riboviria	Chuviridae-Like	Chuviridae-Like	Wuhan house centipede virus 5	1923709
Riboviria	Chuviridae-Like	Chuviridae-Like	Wuhan house centipede virus 4	1923708
Riboviria	Chuviridae-Like	Chuviridae-Like	Wuhan heteroptera virus 2	1923702
Riboviria	Chuviridae-Like	Chuviridae-Like	Wuhan fly virus 5	1923699
Riboviria	Chuviridae-Like	Chuviridae-Like	Wuhan house centipede virus 6	1923710
Riboviria	Chuviridae-Like	Chuviridae-Like	Wuhan insect virus 10	1923714
Riboviria	Chuviridae-Like	Chuviridae-Like	Wuhan horsefly Virus 3	1923704
Riboviria	Chuviridae-Like	Chuviridae-Like	Wuhan insect virus 17	1923721
Riboviria	Chuviridae-Like	Chuviridae-Like	Wuhan insect virus 18	1923722
Riboviria	Chuviridae-Like	Chuviridae-Like	Wuhan house centipede virus 9	1923713
Riboviria	Chuviridae-Like	Chuviridae-Like	Wuhan house centipede virus 1	1923705
Riboviria	Chuviridae-Like	Chuviridae-Like	Wuhan insect virus 27	1923731
Riboviria	Chuviridae-Like	Chuviridae-Like	Wuhan insect virus 31	1923735
Riboviria	Chuviridae-Like	Chuviridae-Like	Wuhan insect virus 28	1923732
Riboviria	Chuviridae-Like	Chuviridae-Like	Wuhan insect virus 26	1923730
Riboviria	Chuviridae-Like	Chuviridae-Like	Wuhan insect virus 20	1923724
Riboviria	Chuviridae-Like	Chuviridae-Like	Wuhan fly virus 4	1923698
Riboviria	Chuviridae-Like	Chuviridae-Like	Wuhan heteroptera virus 1	1923701
Riboviria	Chuviridae-Like	Chuviridae-Like	Wuhan insect virus 11	1923715
Riboviria	Chuviridae-Like	Chuviridae-Like	Wuhan house centipede virus 2	1923706
Riboviria	Chuviridae-Like	Chuviridae-Like	Wuhan house centipede virus 3	1923707
Riboviria	Chuviridae-Like	Chuviridae-Like	Wuhan insect virus 19	1923723
Riboviria	Chuviridae-Like	Chuviridae-Like	Wuhan insect virus 13	1923717
Riboviria	Chuviridae-Like	Chuviridae-Like	Wuhan coneheads virus 2	1923696
Riboviria	Chuviridae-Like	Chuviridae-Like	Wuhan Millipede virus 4	1923689
Riboviria	Chuviridae-Like	Chuviridae-Like	Wuhan arthropod virus 4	1923693
Riboviria	Chuviridae-Like	Chuviridae-Like	Wuchan romanomermis nematode virus 3	1923687
Riboviria	Chuviridae-Like	Chuviridae-Like	Wenzhou tombus-like virus 9	1923679
Riboviria	Chuviridae-Like	Chuviridae-Like	Wenzhou tombus-like virus 14	1923667
Riboviria	Chuviridae-Like	Chuviridae-Like	Wuchang cockroach Virus 4	1923688
Riboviria	Chuviridae-Like	Chuviridae-Like	Wenzhou tombus-like virus 10	1923663
Riboviria	Chuviridae-Like	Chuviridae-Like	Wenzhou tombus-like virus 15	1923668
Riboviria	Chuviridae-Like	Chuviridae-Like	Wuchan romanomermis nematode virus 2	1923686
Riboviria	Chuviridae-Like	Chuviridae-Like	Wenzhou tombus-like virus 1	1923662
Riboviria	Chuviridae-Like	Chuviridae-Like	Wenzhou tombus-like virus 8	1923678
Riboviria	Chuviridae-Like	Chuviridae-Like	Wenzhou tombus-like virus 3	1923673
Riboviria	Chuviridae-Like	Chuviridae-Like	Wenzhou tombus-like virus 17	1923670
Riboviria	Chuviridae-Like	Chuviridae-Like	Wenzhou tombus-like virus 18	1923671
Riboviria	Chuviridae-Like	Chuviridae-Like	Wenzhou tombus-like virus 2	1923672
Riboviria	Chuviridae-Like	Chuviridae-Like	Wenzhou tombus-like virus 12	1923665
Riboviria	Chuviridae-Like	Chuviridae-Like	Wenzhou tombus-like virus 6	1923676
Riboviria	Chuviridae-Like	Chuviridae-Like	Wenzhou tombus-like virus 16	1923669
Riboviria	Chuviridae-Like	Chuviridae-Like	Wuhan arthropod virus 3	1923692
Riboviria	Chuviridae-Like	Chuviridae-Like	Wenzhou yanvirus-like virus 2	1923684
Riboviria	Chuviridae-Like	Chuviridae-Like	Wenzhou weivirus-like virus 1	1923682
Riboviria	Chuviridae-Like	Chuviridae-Like	Wuhan arthropod virus 1	1923690
Riboviria	Chuviridae-Like	Chuviridae-Like	Wenzhou tombus-like virus 4	1923674
Riboviria	Chuviridae-Like	Chuviridae-Like	Wuchan romanomermis nematode virus 1	1923685
Riboviria	Chuviridae-Like	Chuviridae-Like	Wuhan coneheads virus 1	1923695
Riboviria	Chuviridae-Like	Chuviridae-Like	Wenzhou tombus-like virus 11	1923664
Riboviria	Chuviridae-Like	Chuviridae-Like	Wenzhou tombus-like virus 7	1923677
Riboviria	Chuviridae-Like	Chuviridae-Like	Wenzhou tombus-like virus 5	1923675
Riboviria	Chuviridae-Like	Chuviridae-Like	Wuhan arthropod virus 2	1923691
Riboviria	Chuviridae-Like	Chuviridae-Like	Wenzhou yanvirus-like virus 1	1923683
Riboviria	Chuviridae-Like	Chuviridae-Like	Hubei diptera virus 13	1922874
Riboviria	Chuviridae-Like	Chuviridae-Like	Hubei diptera virus 12	1922873
Riboviria	Chuviridae-Like	Chuviridae-Like	Hubei diptera virus 14	1922875
Riboviria	Chuviridae-Like	Chuviridae-Like	Hubei chuvirus-like virus 1	1922857
Riboviria	Chuviridae-Like	Chuviridae-Like	Hubei Wuhan insect virus 9	1922833
Riboviria	Chuviridae-Like	Chuviridae-Like	Changping earthworm virus 2	1922827
Riboviria	Chuviridae-Like	Chuviridae-Like	Hubei tetragnatha maxillosa virus 8	1923250
Riboviria	Chuviridae-Like	Chuviridae-Like	Hubei orthoptera virus 4	1923012
Riboviria	Chuviridae-Like	Chuviridae-Like	Hubei noda-like virus 8	1922988
Riboviria	Chuviridae-Like	Chuviridae-Like	Hubei noda-like virus 9	1922989
Riboviria	Chuviridae-Like	Chuviridae-Like	Hubei mosquito virus 2	1922926
Riboviria	Chuviridae-Like	Chuviridae-Like	Hubei diptera virus 17	1922878
Riboviria	Chuviridae-Like	Chuviridae-Like	Wenzhou shrimp virus 9	1923656
Riboviria	Chuviridae-Like	Chuviridae-Like	Wenzhou qinvirus-like virus 1	1923647
Riboviria	Chuviridae-Like	Chuviridae-Like	Wenling crustacean virus 13	1923482
Riboviria	Chuviridae-Like	Chuviridae-Like	Wenling crustacean virus 14	1923483
Riboviria	Chuviridae-Like	Chuviridae-Like	Sanxia water strider virus 10	1923394
Riboviria	Chuviridae-Like	Chuviridae-Like	Hubei unio douglasiae virus 1	1923321
Riboviria	Chuviridae-Like	Chuviridae-Like	Hubei virga-like virus 12	1923327
Riboviria	Chuviridae-Like	Chuviridae-Like	Beihai tombus-like virus 2	1922723
Riboviria	Chuviridae-Like	Chuviridae-Like	Hubei rhabdo-like virus 9	1923193
Riboviria	Chuviridae-Like	Chuviridae-Like	Sanxia picorna-like virus 13	1923370
Riboviria	Chuviridae-Like	Chuviridae-Like	Shuangao insect virus 11	1923467
Riboviria	Chuviridae-Like	Chuviridae-Like	Hubei narna-like virus 13	1922943
Riboviria	Chuviridae-Like	Chuviridae-Like	Hubei tombus-like virus 43	1923291
Riboviria	Chuviridae-Like	Chuviridae-Like	Sanxia picorna-like virus 5	1923374
Riboviria	Chuviridae-Like	Chuviridae-Like	Hubei rhabdo-like virus 2	1923186
Riboviria	Chuviridae-Like	Chuviridae-Like	Hubei macula-like virus 2	1922923
Riboviria	Chuviridae-Like	Chuviridae-Like	Hubei narna-like virus 19	1922949
Riboviria	Chuviridae-Like	Chuviridae-Like	Sanxia picorna-like virus 8	1923377
Riboviria	Chuviridae-Like	Chuviridae-Like	Hubei mosquito virus 3	1922927
Riboviria	Chuviridae-Like	Chuviridae-Like	Hubei picorna-like virus 68	1923151
Riboviria	Chuviridae-Like	Chuviridae-Like	Hubei narna-like virus 3	1922957
Riboviria	Chuviridae-Like	Chuviridae-Like	Hubei macula-like virus 1	1922922
Riboviria	Chuviridae-Like	Chuviridae-Like	Hubei narna-like virus 15	1922945
Riboviria	Chuviridae-Like	Chuviridae-Like	Beihai sobemo-like virus 13	1922684
Riboviria	Chuviridae-Like	Chuviridae-Like	Hubei permutotetra-like virus 9	1923083
Riboviria	Chuviridae-Like	Chuviridae-Like	Beihai tombus-like virus 5	1922726
Riboviria	Chuviridae-Like	Chuviridae-Like	Hubei narna-like virus 21	1922952
Riboviria	Chuviridae-Like	Chuviridae-Like	Hubei tombus-like virus 3	1923277
Riboviria	Chuviridae-Like	Chuviridae-Like	Hubei virga-like virus 7	1923340
Riboviria	Chuviridae-Like	Chuviridae-Like	Sanxia picorna-like virus 3	1923372
Riboviria	Chuviridae-Like	Chuviridae-Like	Hubei permutotetra-like virus 10	1923074
Riboviria	Chuviridae-Like	Chuviridae-Like	Beihai tombus-like virus 11	1922714
Riboviria	Chuviridae-Like	Chuviridae-Like	Hubei odonate virus 4	1922999
Riboviria	Chuviridae-Like	Chuviridae-Like	Hubei picorna-like virus 72	1923156
Riboviria	Chuviridae-Like	Chuviridae-Like	Sanxia picorna-like virus 9	1923378
Riboviria	Chuviridae-Like	Chuviridae-Like	Wenzhou crab virus 4	1923561
Riboviria	Chuviridae-Like	Chuviridae-Like	Wenzhou sobemo-like virus 1	1923657
Riboviria	Chuviridae-Like	Chuviridae-Like	Hubei picorna-like virus 41	1923122
Riboviria	Chuviridae-Like	Chuviridae-Like	Hubei tombus-like virus 5	1923292
Riboviria	Chuviridae-Like	Chuviridae-Like	Wenling sobemo-like virus 1	1923540
Riboviria	Chuviridae-Like	Chuviridae-Like	Sanxia picorna-like virus 10	1923367
Riboviria	Chuviridae-Like	Chuviridae-Like	Hubei narna-like virus 17	1922947
Riboviria	Chuviridae-Like	Chuviridae-Like	Hubei permutotetra-like virus 5	1923079
Riboviria	Chuviridae-Like	Chuviridae-Like	Hubei odonate virus 7	1923002
Riboviria	Chuviridae-Like	Chuviridae-Like	Hubei tombus-like virus 6	1923293
Riboviria	Chuviridae-Like	Chuviridae-Like	Hubei polero-like virus 2	1923170
Riboviria	Chuviridae-Like	Chuviridae-Like	Sanxia atyid shrimp virus 3	1923357
Riboviria	Chuviridae-Like	Chuviridae-Like	Hubei picorna-like virus 22	1923102
Riboviria	Chuviridae-Like	Chuviridae-Like	Hubei picorna-like virus 51	1923133
Riboviria	Chuviridae-Like	Chuviridae-Like	Hubei picorna-like virus 30	1923110
Riboviria	Chuviridae-Like	Chuviridae-Like	Hubei picorna-like virus 1	1923088
Riboviria	Chuviridae-Like	Chuviridae-Like	Wenzhou picorna-like virus 14	1923598
Riboviria	Chuviridae-Like	Chuviridae-Like	Hubei virga-like virus 17	1923332
Riboviria	Chuviridae-Like	Chuviridae-Like	Sanxia picorna-like virus 11	1923368
Riboviria	Chuviridae-Like	Chuviridae-Like	Hubei tombus-like virus 36	1923284
Riboviria	Chuviridae-Like	Chuviridae-Like	Hubei picorna-like virus 7	1923153
Riboviria	Chuviridae-Like	Chuviridae-Like	Hubei picorna-like virus 8	1923164
Riboviria	Chuviridae-Like	Chuviridae-Like	Hubei tombus-like virus 24	1923271
Riboviria	Chuviridae-Like	Chuviridae-Like	Hubei permutotetra-like virus 8	1923082
Riboviria	Chuviridae-Like	Chuviridae-Like	Wenzhou picorna-like virus 19	1923603
Riboviria	Chuviridae-Like	Chuviridae-Like	Hubei picorna-like virus 10	1923089
Riboviria	Chuviridae-Like	Chuviridae-Like	Sanxia picorna-like virus 1	1923366
Riboviria	Chuviridae-Like	Chuviridae-Like	Hubei picorna-like virus 78	1923162
Riboviria	Chuviridae-Like	Chuviridae-Like	Hubei virga-like virus 15	1923330
Riboviria	Chuviridae-Like	Chuviridae-Like	Hubei picorna-like virus 33	1923113
Riboviria	Chuviridae-Like	Chuviridae-Like	Sanxia picorna-like virus 4	1923373
Riboviria	Chuviridae-Like	Chuviridae-Like	Beihai tombus-like virus 7	1922728
Riboviria	Chuviridae-Like	Chuviridae-Like	Hubei tombus-like virus 42	1923290
Riboviria	Chuviridae-Like	Chuviridae-Like	Hubei odonate virus 5	1923000
Riboviria	Chuviridae-Like	Chuviridae-Like	Wenzhou picorna-like virus 26	1923611
Riboviria	Chuviridae-Like	Chuviridae-Like	Hubei endorna-like virus 1	1922893
Riboviria	Chuviridae-Like	Chuviridae-Like	Sanxia picorna-like virus 2	1923371
Riboviria	Chuviridae-Like	Chuviridae-Like	Beihai tombus-like virus 15	1922718
Riboviria	Chuviridae-Like	Chuviridae-Like	Hubei picorna-like virus 37	1923117
Riboviria	Chuviridae-Like	Chuviridae-Like	Hubei odonate virus 1	1922990
Riboviria	Chuviridae-Like	Chuviridae-Like	Changjiang tombus-like virus 22	1922816
Riboviria	Chuviridae-Like	Chuviridae-Like	Wenzhou picorna-like virus 44	1923631
Riboviria	Chuviridae-Like	Chuviridae-Like	Wenling zhaovirus-like virus 1	1923551
Riboviria	Chuviridae-Like	Chuviridae-Like	Sanxia water strider virus 19	1923403
Riboviria	Chuviridae-Like	Chuviridae-Like	Hubei picorna-like virus 35	1923115
Riboviria	Chuviridae-Like	Chuviridae-Like	Sanxia water strider virus 8	1923407
Riboviria	Chuviridae-Like	Chuviridae-Like	Hubei zhaovirus-like virus 2	1923345
Riboviria	Chuviridae-Like	Chuviridae-Like	Hubei virga-like virus 21	1923336
Riboviria	Chuviridae-Like	Chuviridae-Like	Changjiang tombus-like virus 11	1922804
Riboviria	Chuviridae-Like	Chuviridae-Like	Hubei picorna-like virus 25	1923105
Riboviria	Chuviridae-Like	Chuviridae-Like	Sanxia water strider virus 21	1923405
Riboviria	Chuviridae-Like	Chuviridae-Like	Sanxia permutotetra-like virus 1	1923365
Riboviria	Chuviridae-Like	Chuviridae-Like	Sanxia tombus-like virus 2	1923386
Riboviria	Chuviridae-Like	Chuviridae-Like	Hubei zhaovirus-like virus 1	1923344
Riboviria	Chuviridae-Like	Chuviridae-Like	Sanxia atyid shrimp virus 2	1923356
Riboviria	Chuviridae-Like	Chuviridae-Like	Wenzhou hepe-like virus 1	1923566
Riboviria	Chuviridae-Like	Chuviridae-Like	Changjiang tombus-like virus 7	1922821
Riboviria	Chuviridae-Like	Chuviridae-Like	Shayang ascaridia galli virus 2	1923460
Riboviria	Chuviridae-Like	Chuviridae-Like	Changjiang zhaovirus-like virus 1	1922824
Riboviria	Chuviridae-Like	Chuviridae-Like	Hubei permutotetra-like virus 3	1923077
Riboviria	Chuviridae-Like	Chuviridae-Like	Sanxia tombus-like virus 1	1923385
Riboviria	Chuviridae-Like	Chuviridae-Like	Wenzhou narna-like virus 9	1923584
Riboviria	Chuviridae-Like	Chuviridae-Like	Beihai zhaovirus-like virus 4	1922760
Riboviria	Chuviridae-Like	Chuviridae-Like	Hubei virga-like virus 23	1923338
Riboviria	Chuviridae-Like	Chuviridae-Like	Wenzhou gastropodes virus 2	1923564
Riboviria	Chuviridae-Like	Chuviridae-Like	Sanxia tombus-like virus 3	1923387
Riboviria	Chuviridae-Like	Chuviridae-Like	Changjiang tombus-like virus 5	1922819
Riboviria	Chuviridae-Like	Chuviridae-Like	Sanxia atyid shrimp virus 4	1923358
Riboviria	Chuviridae-Like	Chuviridae-Like	Beihai zhaovirus-like virus 3	1922759
Riboviria	Chuviridae-Like	Chuviridae-Like	Wenzhou bivalvia virus 3	1923555
Riboviria	Chuviridae-Like	Chuviridae-Like	Hubei virga-like virus 1	1923324
Riboviria	Chuviridae-Like	Chuviridae-Like	Wenzhou shrimp virus 10	1923649
Riboviria	Chuviridae-Like	Chuviridae-Like	Wenzhou picorna-like virus 53	1923641
Riboviria	Chuviridae-Like	Chuviridae-Like	Beihai zhaovirus-like virus 1	1922757
Riboviria	Chuviridae-Like	Chuviridae-Like	Changjiang tombus-like virus 9	1922823
Riboviria	Chuviridae-Like	Chuviridae-Like	Hubei picorna-like virus 79	1923163
Riboviria	Chuviridae-Like	Chuviridae-Like	Beihai zhaovirus-like virus 2	1922758
Riboviria	Chuviridae-Like	Chuviridae-Like	Hubei virga-like virus 2	1923335
Riboviria	Chuviridae-Like	Chuviridae-Like	Hubei picorna-like virus 58	1923140
Riboviria	Chuviridae-Like	Chuviridae-Like	Wenzhou gastropodes virus 1	1923563
Riboviria	Chuviridae-Like	Chuviridae-Like	Changjiang tombus-like virus 20	1922814
Riboviria	Chuviridae-Like	Chuviridae-Like	Beihai zhaovirus-like virus 5	1922761
Riboviria	Chuviridae-Like	Chuviridae-Like	Hubei tetragnatha maxillosa virus 5	1923247
Riboviria	Chuviridae-Like	Chuviridae-Like	Wenzhou picorna-like virus 4	1923626
Riboviria	Chuviridae-Like	Chuviridae-Like	Wenzhou picorna-like virus 47	1923634
Riboviria	Chuviridae-Like	Chuviridae-Like	Sanxia tombus-like virus 9	1923393
Riboviria	Chuviridae-Like	Chuviridae-Like	Hubei picorna-like virus 60	1923143
Riboviria	Chuviridae-Like	Chuviridae-Like	Wenzhou hepe-like virus 2	1923565
Riboviria	Chuviridae-Like	Chuviridae-Like	Shuangao alphatetra-like virus 1	1923464
Riboviria	Chuviridae-Like	Chuviridae-Like	Hubei picorna-like virus 64	1923147
Riboviria	Chuviridae-Like	Chuviridae-Like	Wenzhou narna-like virus 7	1923582
Riboviria	Chuviridae-Like	Chuviridae-Like	Changjiang narna-like virus 4	1922779
Riboviria	Chuviridae-Like	Chuviridae-Like	Changjiang tombus-like virus 6	1922820
Riboviria	Chuviridae-Like	Chuviridae-Like	Hubei picorna-like virus 80	1923165
Riboviria	Chuviridae-Like	Chuviridae-Like	Hubei permutotetra-like virus 4	1923078
Riboviria	Chuviridae-Like	Chuviridae-Like	Sanxia water strider virus 16	1923400
Riboviria	Chuviridae-Like	Chuviridae-Like	Wenzhou sobemo-like virus 4	1923660
Riboviria	Chuviridae-Like	Chuviridae-Like	Wenzhou picorna-like virus 1	1923593
Riboviria	Chuviridae-Like	Chuviridae-Like	Hubei picorna-like virus 43	1923124
Riboviria	Chuviridae-Like	Chuviridae-Like	Changjiang tombus-like virus 2	1922813
Riboviria	Chuviridae-Like	Chuviridae-Like	Hubei permutotetra-like virus 7	1923081
Riboviria	Chuviridae-Like	Chuviridae-Like	Wenzhou picorna-like virus 5	1923637
Riboviria	Chuviridae-Like	Chuviridae-Like	Sanxia tombus-like virus 4	1923388
Riboviria	Chuviridae-Like	Chuviridae-Like	Wenzhou sobemo-like virus 3	1923659
Riboviria	Chuviridae-Like	Chuviridae-Like	Hubei picorna-like virus 65	1923148
Riboviria	Chuviridae-Like	Chuviridae-Like	Hubei picorna-like virus 13	1923092
Riboviria	Chuviridae-Like	Chuviridae-Like	Beihai tiger crab virus 1	1922711
Riboviria	Chuviridae-Like	Chuviridae-Like	Changjiang narna-like virus 3	1922778
Riboviria	Chuviridae-Like	Chuviridae-Like	Changjiang tombus-like virus 17	1922810
Riboviria	Chuviridae-Like	Chuviridae-Like	Hubei tetragnatha maxillosa virus 3	1923245
Riboviria	Chuviridae-Like	Chuviridae-Like	Hubei permutotetra-like virus 2	1923076
Riboviria	Chuviridae-Like	Chuviridae-Like	Wenzhou sobemo-like virus 2	1923658
Riboviria	Chuviridae-Like	Chuviridae-Like	Hubei picorna-like virus 18	1923097
Riboviria	Chuviridae-Like	Chuviridae-Like	Changjiang narna-like virus 1	1922776
Riboviria	Chuviridae-Like	Chuviridae-Like	Sanxia tombus-like virus 6	1923390
Riboviria	Chuviridae-Like	Chuviridae-Like	Wenling hepe-like virus 1	1923493
Riboviria	Chuviridae-Like	Chuviridae-Like	Hubei permutotetra-like virus 6	1923080
Riboviria	Chuviridae-Like	Chuviridae-Like	Hubei yanvirus-like virus 1	1923343
Riboviria	Chuviridae-Like	Chuviridae-Like	Hubei picorna-like virus 14	1923093
Riboviria	Chuviridae-Like	Chuviridae-Like	Changjiang narna-like virus 2	1922777
Riboviria	Chuviridae-Like	Chuviridae-Like	Wenzhou picorna-like virus 6	1923643
Riboviria	Chuviridae-Like	Chuviridae-Like	Wenzhou narna-like virus 5	1923580
Riboviria	Chuviridae-Like	Chuviridae-Like	Hubei picorna-like virus 32	1923112
Riboviria	Chuviridae-Like	Chuviridae-Like	Wenzhou picorna-like virus 43	1923630
Riboviria	Chuviridae-Like	Chuviridae-Like	Shahe isopoda virus 3	1923423
Riboviria	Chuviridae-Like	Chuviridae-Like	Hubei permutotetra-like virus 1	1923073
Riboviria	Chuviridae-Like	Chuviridae-Like	Changjiang tombus-like virus 3	1922817
Riboviria	Chuviridae-Like	Chuviridae-Like	Hubei diptera virus 10	1922871
Riboviria	Chuviridae-Like	Chuviridae-Like	Hubei odonate virus 3	1922998
Riboviria	Chuviridae-Like	Chuviridae-Like	Wenzhou bivalvia virus 2	1923554
Riboviria	Chuviridae-Like	Chuviridae-Like	Hubei picorna-like virus 28	1923108
Riboviria	Chuviridae-Like	Chuviridae-Like	Wenling hepe-like virus 4	1923496
Riboviria	Chuviridae-Like	Chuviridae-Like	Hubei permutotetra-like virus 11	1923075
Riboviria	Chuviridae-Like	Chuviridae-Like	Changjiang tombus-like virus 14	1922807
Riboviria	Chuviridae-Like	Chuviridae-Like	Hubei tetragnatha maxillosa virus 2	1923244
Riboviria	Chuviridae-Like	Chuviridae-Like	Hubei picorna-like virus 55	1923137
Riboviria	Chuviridae-Like	Chuviridae-Like	Wenling narna-like virus 1	1923501
Riboviria	Chuviridae-Like	Chuviridae-Like	Shuangao sobemo-like virus 2	1923475
Riboviria	Chuviridae-Like	Chuviridae-Like	Wenzhou picorna-like virus 24	1923609
Riboviria	Chuviridae-Like	Chuviridae-Like	Hubei picorna-like virus 4	1923120
Riboviria	Chuviridae-Like	Chuviridae-Like	Wenling hepe-like virus 3	1923495
Riboviria	Chuviridae-Like	Chuviridae-Like	Beihai weivirus-like virus 9	1922756
Riboviria	Chuviridae-Like	Chuviridae-Like	Shuangao sobemo-like virus 1	1923474
Riboviria	Chuviridae-Like	Chuviridae-Like	Wenzhou picorna-like virus 32	1923618
Riboviria	Chuviridae-Like	Chuviridae-Like	Hubei virga-like virus 11	1923326
Riboviria	Chuviridae-Like	Chuviridae-Like	Hubei picorna-like virus 2	1923099
Riboviria	Chuviridae-Like	Chuviridae-Like	Beihai sphaeromadae virus 4	1922710
Riboviria	Chuviridae-Like	Chuviridae-Like	Sanxia water strider virus 17	1923401
Riboviria	Chuviridae-Like	Chuviridae-Like	Changjiang tombus-like virus 4	1922818
Riboviria	Chuviridae-Like	Chuviridae-Like	Wenzhou picorna-like virus 13	1923597
Riboviria	Chuviridae-Like	Chuviridae-Like	Beihai weivirus-like virus 20	1922749
Riboviria	Chuviridae-Like	Chuviridae-Like	Shuangao sobemo-like virus 3	1923476
Riboviria	Chuviridae-Like	Chuviridae-Like	Hubei odonate virus 6	1923001
Riboviria	Chuviridae-Like	Chuviridae-Like	Hubei dimarhabdovirus virus 1	1922866
Riboviria	Chuviridae-Like	Chuviridae-Like	Hubei picorna-like virus 21	1923101
Riboviria	Chuviridae-Like	Chuviridae-Like	Sanxia tombus-like virus 8	1923392
Riboviria	Chuviridae-Like	Chuviridae-Like	Wenzhou picorna-like virus 9	1923646
Riboviria	Chuviridae-Like	Chuviridae-Like	Beihai weivirus-like virus 11	1922740
Riboviria	Chuviridae-Like	Chuviridae-Like	Wenling crustacean virus 1	1923478
Riboviria	Chuviridae-Like	Chuviridae-Like	Wenling narna-like virus 9	1923509
Riboviria	Chuviridae-Like	Chuviridae-Like	Changjiang tombus-like virus 8	1922822
Riboviria	Chuviridae-Like	Chuviridae-Like	Hubei picorna-like virus 6	1923142
Riboviria	Chuviridae-Like	Chuviridae-Like	Hubei odonate virus 2	1922997
Riboviria	Chuviridae-Like	Chuviridae-Like	Wenling narna-like virus 2	1923502
Riboviria	Chuviridae-Like	Chuviridae-Like	Wenling tombus-like virus 2	1923544
Riboviria	Chuviridae-Like	Chuviridae-Like	Sanxia tombus-like virus 5	1923389
Riboviria	Chuviridae-Like	Chuviridae-Like	Wenzhou picorna-like virus 17	1923601
Riboviria	Chuviridae-Like	Chuviridae-Like	Beihai weivirus-like virus 12	1922741
Riboviria	Chuviridae-Like	Chuviridae-Like	Hubei diptera virus 11	1922872
Riboviria	Chuviridae-Like	Chuviridae-Like	Hubei coleoptera virus 2	1922861
Riboviria	Chuviridae-Like	Chuviridae-Like	Hubei picorna-like virus 71	1923155
Riboviria	Chuviridae-Like	Chuviridae-Like	Changjiang crawfish virus 7	1922771
Riboviria	Chuviridae-Like	Chuviridae-Like	Wenzhou picorna-like virus 45	1923632
Riboviria	Chuviridae-Like	Chuviridae-Like	Hubei picorna-like virus 5	1923131
Riboviria	Chuviridae-Like	Chuviridae-Like	Wenling narna-like virus 7	1923507
Riboviria	Chuviridae-Like	Chuviridae-Like	Beihai weivirus-like virus 4	1922752
Riboviria	Chuviridae-Like	Chuviridae-Like	Hubei picorna-like virus 27	1923107
Riboviria	Chuviridae-Like	Chuviridae-Like	Wenling narna-like virus 3	1923503
Riboviria	Chuviridae-Like	Chuviridae-Like	Wenling tombus-like virus 1	1923543
Riboviria	Chuviridae-Like	Chuviridae-Like	Changjiang tombus-like virus 12	1922805
Riboviria	Chuviridae-Like	Chuviridae-Like	Wenzhou picorna-like virus 20	1923605
Riboviria	Chuviridae-Like	Chuviridae-Like	Hubei picorna-like virus 34	1923114
Riboviria	Chuviridae-Like	Chuviridae-Like	Changjiang hepe-like virus 1	1922772
Riboviria	Chuviridae-Like	Chuviridae-Like	Wenling narna-like virus 5	1923505
Riboviria	Chuviridae-Like	Chuviridae-Like	Beihai sobemo-like virus 12	1922683
Riboviria	Chuviridae-Like	Chuviridae-Like	Wenzhou picorna-like virus 54	1923642
Riboviria	Chuviridae-Like	Chuviridae-Like	Beihai weivirus-like virus 15	1922743
Riboviria	Chuviridae-Like	Chuviridae-Like	Hubei diptera virus 9	1922889
Riboviria	Chuviridae-Like	Chuviridae-Like	Wenling narna-like virus 4	1923504
Riboviria	Chuviridae-Like	Chuviridae-Like	Hubei hepe-like virus 3	1922896
Riboviria	Chuviridae-Like	Chuviridae-Like	Beihai weivirus-like virus 1	1922738
Riboviria	Chuviridae-Like	Chuviridae-Like	Hubei coleoptera virus 1	1922860
Riboviria	Chuviridae-Like	Chuviridae-Like	Changjiang sobemo-like virus 2	1922801
Riboviria	Chuviridae-Like	Chuviridae-Like	Changjiang tombus-like virus 1	1922802
Riboviria	Chuviridae-Like	Chuviridae-Like	Hubei rhabdo-like virus 7	1923191
Riboviria	Chuviridae-Like	Chuviridae-Like	Hubei picorna-like virus 38	1923118
Riboviria	Chuviridae-Like	Chuviridae-Like	Wenling tombus-like virus 4	1923546
Riboviria	Chuviridae-Like	Chuviridae-Like	Hubei tombus-like virus 28	1923275
Riboviria	Chuviridae-Like	Chuviridae-Like	Wenzhou crab virus 5	1923562
Riboviria	Chuviridae-Like	Chuviridae-Like	Hubei picorna-like virus 69	1923152
Riboviria	Chuviridae-Like	Chuviridae-Like	Beihai weivirus-like virus 13	1922742
Riboviria	Chuviridae-Like	Chuviridae-Like	Hubei picorna-like virus 59	1923141
Riboviria	Chuviridae-Like	Chuviridae-Like	Changjiang polero-like virus 1	1922799
Riboviria	Chuviridae-Like	Chuviridae-Like	Hubei tombus-like virus 13	1923259
Riboviria	Chuviridae-Like	Chuviridae-Like	Changjiang tombus-like virus 16	1922809
Riboviria	Chuviridae-Like	Chuviridae-Like	Hubei chuvirus-like virus 3	1922858
Riboviria	Chuviridae-Like	Chuviridae-Like	Hubei mosquito virus 1	1922925
Riboviria	Chuviridae-Like	Chuviridae-Like	Hubei narna-like virus 4	1922958
Riboviria	Chuviridae-Like	Chuviridae-Like	Wenling toti-like virus 2	1923549
Riboviria	Chuviridae-Like	Chuviridae-Like	Changjiang sobemo-like virus 1	1922800
Riboviria	Chuviridae-Like	Chuviridae-Like	Wenzhou picorna-like virus 21	1923606
Riboviria	Chuviridae-Like	Chuviridae-Like	Hubei tombus-like virus 15	1923261
Riboviria	Chuviridae-Like	Chuviridae-Like	Changjiang tombus-like virus 10	1922803
Riboviria	Chuviridae-Like	Chuviridae-Like	Beihai weivirus-like virus 21	1922750
Riboviria	Chuviridae-Like	Chuviridae-Like	Hubei dimarhabdovirus virus 2	1922867
Riboviria	Chuviridae-Like	Chuviridae-Like	Hubei picorna-like virus 67	1923150
Riboviria	Chuviridae-Like	Chuviridae-Like	Beihai weivirus-like virus 18	1922746
Riboviria	Chuviridae-Like	Chuviridae-Like	Hubei picorna-like virus 61	1923144
Riboviria	Chuviridae-Like	Chuviridae-Like	Changjiang tombus-like virus 18	1922811
Riboviria	Chuviridae-Like	Chuviridae-Like	Wenzhou picorna-like virus 37	1923623
Riboviria	Chuviridae-Like	Chuviridae-Like	Hubei picorna-like virus 20	1923100
Riboviria	Chuviridae-Like	Chuviridae-Like	Jingmen picorna-like virus	1923350
Riboviria	Chuviridae-Like	Chuviridae-Like	Changjiang tombus-like virus 19	1922812
Riboviria	Chuviridae-Like	Chuviridae-Like	Wenzhou shrimp virus 6	1923653
Riboviria	Chuviridae-Like	Chuviridae-Like	Beihai weivirus-like virus 7	1922754
Riboviria	Chuviridae-Like	Chuviridae-Like	Shuangao insect virus 12	1923468
Riboviria	Chuviridae-Like	Chuviridae-Like	Hubei picorna-like virus 45	1923126
Riboviria	Chuviridae-Like	Chuviridae-Like	Hubei tombus-like virus 1	1923255
Riboviria	Chuviridae-Like	Chuviridae-Like	Changjiang tombus-like virus 21	1922815
Riboviria	Chuviridae-Like	Chuviridae-Like	Hubei picorna-like virus 63	1923146
Riboviria	Chuviridae-Like	Chuviridae-Like	Wenzhou shrimp virus 4	1923651
Riboviria	Chuviridae-Like	Chuviridae-Like	Hubei tombus-like virus 20	1923267
Riboviria	Chuviridae-Like	Chuviridae-Like	Hubei picorna-like virus 74	1923158
Riboviria	Chuviridae-Like	Chuviridae-Like	Hubei picorna-like virus 48	1923129
Riboviria	Chuviridae-Like	Chuviridae-Like	Hubei tombus-like virus 38	1923286
Riboviria	Chuviridae-Like	Chuviridae-Like	Beihai sobemo-like virus 6	1922703
Riboviria	Chuviridae-Like	Chuviridae-Like	Hubei dimarhabdovirus virus 3	1922868
Riboviria	Chuviridae-Like	Chuviridae-Like	Wenzhou picorna-like virus 10	1923594
Riboviria	Chuviridae-Like	Chuviridae-Like	Beihai weivirus-like virus 5	1922753
Riboviria	Chuviridae-Like	Chuviridae-Like	Hubei picorna-like virus 26	1923106
Riboviria	Chuviridae-Like	Chuviridae-Like	Beihai sphaeromadae virus 1	1922707
Riboviria	Chuviridae-Like	Chuviridae-Like	Beihai sobemo-like virus 18	1922689
Riboviria	Chuviridae-Like	Chuviridae-Like	Wenzhou picorna-like virus 28	1923613
Riboviria	Chuviridae-Like	Chuviridae-Like	Beihai weivirus-like virus 16	1922744
Riboviria	Chuviridae-Like	Chuviridae-Like	Hubei picorna-like virus 75	1923159
Riboviria	Chuviridae-Like	Chuviridae-Like	Beihai sobemo-like virus 8	1922705
Riboviria	Chuviridae-Like	Chuviridae-Like	Hubei rhabdo-like virus 1	1923185
Riboviria	Chuviridae-Like	Chuviridae-Like	Wenzhou picorna-like virus 35	1923621
Riboviria	Chuviridae-Like	Chuviridae-Like	Beihai weivirus-like virus 3	1922751
Riboviria	Chuviridae-Like	Chuviridae-Like	Beihai sobemo-like virus 23	1922695
Riboviria	Chuviridae-Like	Chuviridae-Like	Wenzhou picorna-like virus 36	1923622
Riboviria	Chuviridae-Like	Chuviridae-Like	Hubei tombus-like virus 2	1923266
Riboviria	Chuviridae-Like	Chuviridae-Like	Hubei tombus-like virus 14	1923260
Riboviria	Chuviridae-Like	Chuviridae-Like	Wenzhou picorna-like virus 16	1923600
Riboviria	Chuviridae-Like	Chuviridae-Like	Beihai weivirus-like virus 2	1922748
Riboviria	Chuviridae-Like	Chuviridae-Like	Beihai sobemo-like virus 3	1922700
Riboviria	Chuviridae-Like	Chuviridae-Like	Hubei tombus-like virus 11	1923257
Riboviria	Chuviridae-Like	Chuviridae-Like	Beihai tombus-like virus 18	1922721
Riboviria	Chuviridae-Like	Chuviridae-Like	Beihai sobemo-like virus 9	1922706
Riboviria	Chuviridae-Like	Chuviridae-Like	Hubei odonate virus 11	1922992
Riboviria	Chuviridae-Like	Chuviridae-Like	Beihai weivirus-like virus 17	1922745
Riboviria	Chuviridae-Like	Chuviridae-Like	Hubei toti-like virus 5	1923316
Riboviria	Chuviridae-Like	Chuviridae-Like	Wenzhou picorna-like virus 12	1923596
Riboviria	Chuviridae-Like	Chuviridae-Like	Shahe heteroptera virus 1	1923417
Riboviria	Chuviridae-Like	Chuviridae-Like	Beihai tombus-like virus 8	1922729
Riboviria	Chuviridae-Like	Chuviridae-Like	Beihai weivirus-like virus 8	1922755
Riboviria	Chuviridae-Like	Chuviridae-Like	Hubei tombus-like virus 29	1923276
Riboviria	Chuviridae-Like	Chuviridae-Like	Hubei toti-like virus 18	1923306
Riboviria	Chuviridae-Like	Chuviridae-Like	Wenzhou picorna-like virus 42	1923629
Riboviria	Chuviridae-Like	Chuviridae-Like	Shahe picorna-like virus 3	1923446
Riboviria	Chuviridae-Like	Chuviridae-Like	Beihai sobemo-like virus 7	1922704
Riboviria	Chuviridae-Like	Chuviridae-Like	Hubei odonate virus 10	1922991
Riboviria	Chuviridae-Like	Chuviridae-Like	Wenzhou picorna-like virus 25	1923610
Riboviria	Chuviridae-Like	Chuviridae-Like	Hubei toti-like virus 17	1923305
Riboviria	Chuviridae-Like	Chuviridae-Like	Sanxia sobemo-like virus 5	1923384
Riboviria	Chuviridae-Like	Chuviridae-Like	Shahe picorna-like virus 1	1923439
Riboviria	Chuviridae-Like	Chuviridae-Like	Wenzhou picorna-like virus 33	1923619
Riboviria	Chuviridae-Like	Chuviridae-Like	Hubei toti-like virus 24	1923313
Riboviria	Chuviridae-Like	Chuviridae-Like	Sanxia sobemo-like virus 3	1923382
Riboviria	Chuviridae-Like	Chuviridae-Like	Shahe tombus-like virus 1	1923455
Riboviria	Chuviridae-Like	Chuviridae-Like	Shahe picorna-like virus 14	1923444
Riboviria	Chuviridae-Like	Chuviridae-Like	Beihai sobemo-like virus 5	1922702
Riboviria	Chuviridae-Like	Chuviridae-Like	Wenzhou picorna-like virus 41	1923628
Riboviria	Chuviridae-Like	Chuviridae-Like	Beihai tombus-like virus 10	1922713
Riboviria	Chuviridae-Like	Chuviridae-Like	Sanxia water strider virus 20	1923404
Riboviria	Chuviridae-Like	Chuviridae-Like	Sanxia sobemo-like virus 2	1923381
Riboviria	Chuviridae-Like	Chuviridae-Like	Hubei rhabdo-like virus 3	1923187
Riboviria	Chuviridae-Like	Chuviridae-Like	Shahe picorna-like virus 11	1923441
Riboviria	Chuviridae-Like	Chuviridae-Like	Beihai sobemo-like virus 4	1922701
Riboviria	Chuviridae-Like	Chuviridae-Like	Hubei leech virus 1	1922899
Riboviria	Chuviridae-Like	Chuviridae-Like	Hubei toti-like virus 16	1923304
Riboviria	Chuviridae-Like	Chuviridae-Like	Sanxia sobemo-like virus 1	1923380
Riboviria	Chuviridae-Like	Chuviridae-Like	Hubei coleoptera virus 3	1922862
Riboviria	Chuviridae-Like	Chuviridae-Like	Wenzhou picorna-like virus 40	1923627
Riboviria	Chuviridae-Like	Chuviridae-Like	Shahe tombus-like virus 2	1923456
Riboviria	Chuviridae-Like	Chuviridae-Like	Hubei toti-like virus 15	1923303
Riboviria	Chuviridae-Like	Chuviridae-Like	Sanxia sobemo-like virus 4	1923383
Riboviria	Chuviridae-Like	Chuviridae-Like	Wenzhou picorna-like virus 11	1923595
Riboviria	Chuviridae-Like	Chuviridae-Like	Hubei picorna-like virus 17	1923096
Riboviria	Chuviridae-Like	Chuviridae-Like	Hubei narna-like virus 11	1922941
Riboviria	Chuviridae-Like	Chuviridae-Like	Beihai tombus-like virus 9	1922730
Riboviria	Chuviridae-Like	Chuviridae-Like	Beihai sobemo-like virus 21	1922693
Riboviria	Chuviridae-Like	Chuviridae-Like	Wenzhou picorna-like virus 39	1923625
Riboviria	Chuviridae-Like	Chuviridae-Like	Hubei narna-like virus 7	1922960
Riboviria	Chuviridae-Like	Chuviridae-Like	Hubei hepe-like virus 1	1922894
Riboviria	Chuviridae-Like	Chuviridae-Like	Wenzhou picorna-like virus 29	1923614
Riboviria	Chuviridae-Like	Chuviridae-Like	Hubei lepidoptera virus 2	1922904
Riboviria	Chuviridae-Like	Chuviridae-Like	Wenzhou picorna-like virus 22	1923607
Riboviria	Chuviridae-Like	Chuviridae-Like	Hubei arthropod virus 3	1922836
Riboviria	Chuviridae-Like	Chuviridae-Like	Shahe picorna-like virus 4	1923447
Riboviria	Chuviridae-Like	Chuviridae-Like	Beihai tombus-like virus 3	1922724
Riboviria	Chuviridae-Like	Chuviridae-Like	Hubei diptera virus 22	1922883
Riboviria	Chuviridae-Like	Chuviridae-Like	Hubei tombus-like virus 23	1923270
Riboviria	Chuviridae-Like	Chuviridae-Like	Wenzhou picorna-like virus 49	1923636
Riboviria	Chuviridae-Like	Chuviridae-Like	Hubei picorna-like virus 53	1923135
Riboviria	Chuviridae-Like	Chuviridae-Like	Shahe picorna-like virus 10	1923440
Riboviria	Chuviridae-Like	Chuviridae-Like	Hubei diptera virus 15	1922876
Riboviria	Chuviridae-Like	Chuviridae-Like	Hubei hepe-like virus 2	1922895
Riboviria	Chuviridae-Like	Chuviridae-Like	Beihai sobemo-like virus 25	1922697
Riboviria	Chuviridae-Like	Chuviridae-Like	Shahe picorna-like virus 13	1923443
Riboviria	Chuviridae-Like	Chuviridae-Like	Changjiang astro-like virus	1922764
Riboviria	Chuviridae-Like	Chuviridae-Like	Wenzhou channeled applesnail virus 1	1923557
Riboviria	Chuviridae-Like	Chuviridae-Like	Hubei narna-like virus 9	1922962
Riboviria	Chuviridae-Like	Chuviridae-Like	Wenzhou channeled applesnail virus 3	1923559
Riboviria	Chuviridae-Like	Chuviridae-Like	Beihai sobemo-like virus 2	1922691
Riboviria	Chuviridae-Like	Chuviridae-Like	Shahe picorna-like virus 5	1923448
Riboviria	Chuviridae-Like	Chuviridae-Like	Hubei narna-like virus 2	1922950
Riboviria	Chuviridae-Like	Chuviridae-Like	Wenzhou picorna-like virus 15	1923599
Riboviria	Chuviridae-Like	Chuviridae-Like	Beihai tombus-like virus 17	1922720
Riboviria	Chuviridae-Like	Chuviridae-Like	Hubei tombus-like virus 8	1923295
Riboviria	Chuviridae-Like	Chuviridae-Like	Hubei toti-like virus 9	1923320
Riboviria	Chuviridae-Like	Chuviridae-Like	Wenzhou picorna-like virus 46	1923633
Riboviria	Chuviridae-Like	Chuviridae-Like	Changping earthworm virus 1	1922826
Riboviria	Chuviridae-Like	Chuviridae-Like	Beihai tombus-like virus 13	1922716
Riboviria	Chuviridae-Like	Chuviridae-Like	Changjiang picorna-like virus 13	1922786
Riboviria	Chuviridae-Like	Chuviridae-Like	Hubei toti-like virus 13	1923301
Riboviria	Chuviridae-Like	Chuviridae-Like	Wenzhou channeled applesnail virus 2	1923558
Riboviria	Chuviridae-Like	Chuviridae-Like	Shahe picorna-like virus 6	1923449
Riboviria	Chuviridae-Like	Chuviridae-Like	Hubei tombus-like virus 10	1923256
Riboviria	Chuviridae-Like	Chuviridae-Like	Changjiang crawfish virus 1	1922765
Riboviria	Chuviridae-Like	Chuviridae-Like	Wenzhou picorna-like virus 23	1923608
Riboviria	Chuviridae-Like	Chuviridae-Like	Hubei diptera virus 16	1922877
Riboviria	Chuviridae-Like	Chuviridae-Like	Shahe picorna-like virus 7	1923450
Riboviria	Chuviridae-Like	Chuviridae-Like	Hubei narna-like virus 23	1922954
Riboviria	Chuviridae-Like	Chuviridae-Like	Sanxia atyid shrimp virus 1	1923355
Riboviria	Chuviridae-Like	Chuviridae-Like	Changjiang crawfish virus 3	1922767
Riboviria	Chuviridae-Like	Chuviridae-Like	Hubei narna-like virus 12	1922942
Riboviria	Chuviridae-Like	Chuviridae-Like	Beihai tombus-like virus 14	1922717
Riboviria	Chuviridae-Like	Chuviridae-Like	Beihai sobemo-like virus 27	1922699
Riboviria	Chuviridae-Like	Chuviridae-Like	Wenling crustacean virus 4	1923487
Riboviria	Chuviridae-Like	Chuviridae-Like	Shahe picorna-like virus 9	1923452
Riboviria	Chuviridae-Like	Chuviridae-Like	Beihai tombus-like virus 1	1922712
Riboviria	Chuviridae-Like	Chuviridae-Like	Hubei narna-like virus 22	1922953
Riboviria	Chuviridae-Like	Chuviridae-Like	Changjiang picorna-like virus 7	1922796
Riboviria	Chuviridae-Like	Chuviridae-Like	Beihai sobemo-like virus 22	1922694
Riboviria	Chuviridae-Like	Chuviridae-Like	Wenling crustacean virus 3	1923486
Riboviria	Chuviridae-Like	Chuviridae-Like	Shahe picorna-like virus 12	1923442
Riboviria	Chuviridae-Like	Chuviridae-Like	Hubei tombus-like virus 26	1923273
Riboviria	Chuviridae-Like	Chuviridae-Like	Changjiang picorna-like virus 8	1922797
Riboviria	Chuviridae-Like	Chuviridae-Like	Wenling picorna-like virus 9	1923537
Riboviria	Chuviridae-Like	Chuviridae-Like	Hubei tombus-like virus 12	1923258
Riboviria	Chuviridae-Like	Chuviridae-Like	Wenzhou shrimp virus 8	1923655
Riboviria	Chuviridae-Like	Chuviridae-Like	Changjiang crawfish virus 2	1922766
Riboviria	Chuviridae-Like	Chuviridae-Like	Hubei orthoptera virus 5	1923013
Riboviria	Chuviridae-Like	Chuviridae-Like	Hubei unio douglasiae virus 3	1923323
Riboviria	Chuviridae-Like	Chuviridae-Like	Hubei odonate virus 12	1922993
Riboviria	Chuviridae-Like	Chuviridae-Like	Changjiang picorna-like virus 5	1922794
Riboviria	Chuviridae-Like	Chuviridae-Like	Wenling picorna-like virus 8	1923536
Riboviria	Chuviridae-Like	Chuviridae-Like	Beihai sobemo-like virus 20	1922692
Riboviria	Chuviridae-Like	Chuviridae-Like	Wenzhou picorna-like virus 7	1923644
Riboviria	Chuviridae-Like	Chuviridae-Like	Beihai toti-like virus 4	1922734
Riboviria	Chuviridae-Like	Chuviridae-Like	Wenling crustacean virus 5	1923488
Riboviria	Chuviridae-Like	Chuviridae-Like	Shahe picorna-like virus 2	1923445
Riboviria	Chuviridae-Like	Chuviridae-Like	Wenzhou picorna-like virus 27	1923612
Riboviria	Chuviridae-Like	Chuviridae-Like	Beihai sobemo-like virus 16	1922687
Riboviria	Chuviridae-Like	Chuviridae-Like	Sanxia narna-like virus 1	1923360
Riboviria	Chuviridae-Like	Chuviridae-Like	Wenling picorna-like virus 5	1923533
Riboviria	Chuviridae-Like	Chuviridae-Like	Changjiang picorna-like virus 11	1922784
Riboviria	Chuviridae-Like	Chuviridae-Like	Hubei tombus-like virus 18	1923264
Riboviria	Chuviridae-Like	Chuviridae-Like	Hubei toti-like virus 12	1923300
Riboviria	Chuviridae-Like	Chuviridae-Like	Wenling crustacean virus 2	1923485
Riboviria	Chuviridae-Like	Chuviridae-Like	Shahe isopoda virus 1	1923421
Riboviria	Chuviridae-Like	Chuviridae-Like	Sanxia water strider virus 13	1923397
Riboviria	Chuviridae-Like	Chuviridae-Like	Wenzhou bivalvia virus 1	1923553
Riboviria	Chuviridae-Like	Chuviridae-Like	Hubei tombus-like virus 31	1923279
Riboviria	Chuviridae-Like	Chuviridae-Like	Wenzhou shrimp virus 5	1923652
Riboviria	Chuviridae-Like	Chuviridae-Like	Hubei virga-like virus 16	1923331
Riboviria	Chuviridae-Like	Chuviridae-Like	Changjiang picorna-like virus 10	1922783
Riboviria	Chuviridae-Like	Chuviridae-Like	Shahe isopoda virus 2	1923422
Riboviria	Chuviridae-Like	Chuviridae-Like	Hubei narna-like virus 5	1922959
Riboviria	Chuviridae-Like	Chuviridae-Like	Wenzhou picorna-like virus 48	1923635
Riboviria	Chuviridae-Like	Chuviridae-Like	Hubei toti-like virus 21	1923310
Riboviria	Chuviridae-Like	Chuviridae-Like	Wenling picorna-like virus 7	1923535
Riboviria	Chuviridae-Like	Chuviridae-Like	Beihai sobemo-like virus 19	1922690
Riboviria	Chuviridae-Like	Chuviridae-Like	Changjiang picorna-like virus 15	1922788
Riboviria	Chuviridae-Like	Chuviridae-Like	Wenling picorna-like virus 6	1923534
Riboviria	Chuviridae-Like	Chuviridae-Like	Wenzhou picorna-like virus 52	1923640
Riboviria	Chuviridae-Like	Chuviridae-Like	Hubei tombus-like virus 17	1923263
Riboviria	Chuviridae-Like	Chuviridae-Like	Hubei picorna-like virus 76	1923160
Riboviria	Chuviridae-Like	Chuviridae-Like	Hubei unio douglasiae virus 2	1923322
Riboviria	Chuviridae-Like	Chuviridae-Like	Wenling crustacean virus 6	1923489
Riboviria	Chuviridae-Like	Chuviridae-Like	Shahe heteroptera virus 4	1923420
Riboviria	Chuviridae-Like	Chuviridae-Like	Wenzhou picorna-like virus 2	1923604
Riboviria	Chuviridae-Like	Chuviridae-Like	Hubei toti-like virus 20	1923309
Riboviria	Chuviridae-Like	Chuviridae-Like	Beihai sobemo-like virus 15	1922686
Riboviria	Chuviridae-Like	Chuviridae-Like	Wenling picorna-like virus 1	1923529
Riboviria	Chuviridae-Like	Chuviridae-Like	Wenling crustacean virus 15	1923484
Riboviria	Chuviridae-Like	Chuviridae-Like	Changjiang crawfish virus 6	1922770
Riboviria	Chuviridae-Like	Chuviridae-Like	Hubei arthropod virus 1	1922835
Riboviria	Chuviridae-Like	Chuviridae-Like	Wenling picorna-like virus 4	1923532
Riboviria	Chuviridae-Like	Chuviridae-Like	Shahe endorna-like virus 1	1923414
Riboviria	Chuviridae-Like	Chuviridae-Like	Hubei picorna-like virus 73	1923157
Riboviria	Chuviridae-Like	Chuviridae-Like	Shahe narna-like virus 7	1923435
Riboviria	Chuviridae-Like	Chuviridae-Like	Hubei tetragnatha maxillosa virus 1	1923243
Riboviria	Chuviridae-Like	Chuviridae-Like	Changjiang picorna-like virus 6	1922795
Riboviria	Chuviridae-Like	Chuviridae-Like	Wenling crustacean virus 12	1923481
Riboviria	Chuviridae-Like	Chuviridae-Like	Shahe narna-like virus 2	1923430
Riboviria	Chuviridae-Like	Chuviridae-Like	Wenling picorna-like virus 3	1923531
Riboviria	Chuviridae-Like	Chuviridae-Like	Hubei picorna-like virus 39	1923119
Riboviria	Chuviridae-Like	Chuviridae-Like	Hubei tombus-like virus 25	1923272
Riboviria	Chuviridae-Like	Chuviridae-Like	Changjiang picorna-like virus 2	1922791
Riboviria	Chuviridae-Like	Chuviridae-Like	Beihai tombus-like virus 16	1922719
Riboviria	Chuviridae-Like	Chuviridae-Like	Beihai victori-like virus 1	1922737
Riboviria	Chuviridae-Like	Chuviridae-Like	Shahe sobemo-like virus 1	1923454
Riboviria	Chuviridae-Like	Chuviridae-Like	Wenzhou shrimp virus 3	1923650
Riboviria	Chuviridae-Like	Chuviridae-Like	Hubei rhabdo-like virus 4	1923188
Riboviria	Chuviridae-Like	Chuviridae-Like	Hubei tombus-like virus 7	1923294
Riboviria	Chuviridae-Like	Chuviridae-Like	Wenling crustacean virus 11	1923480
Riboviria	Chuviridae-Like	Chuviridae-Like	Hubei picorna-like virus 16	1923095
Riboviria	Chuviridae-Like	Chuviridae-Like	Changjiang picorna-like virus 12	1922785
Riboviria	Chuviridae-Like	Chuviridae-Like	Hubei picorna-like virus 11	1923090
Riboviria	Chuviridae-Like	Chuviridae-Like	Hubei picorna-like virus 29	1923109
Riboviria	Chuviridae-Like	Chuviridae-Like	Hubei tombus-like virus 33	1923281
Riboviria	Chuviridae-Like	Chuviridae-Like	Hubei diptera virus 1	1922870
Riboviria	Chuviridae-Like	Chuviridae-Like	Changjiang picorna-like virus 14	1922787
Riboviria	Chuviridae-Like	Chuviridae-Like	Hubei picorna-like virus 12	1923091
Riboviria	Chuviridae-Like	Chuviridae-Like	Hubei picorna-like virus 49	1923130
Riboviria	Chuviridae-Like	Chuviridae-Like	Hubei picorna-like virus 36	1923116
Riboviria	Chuviridae-Like	Chuviridae-Like	Hubei picorna-like virus 42	1923123
Riboviria	Chuviridae-Like	Chuviridae-Like	Hubei tombus-like virus 9	1923296
Riboviria	Chuviridae-Like	Chuviridae-Like	Hubei tombus-like virus 40	1923289
Riboviria	Chuviridae-Like	Chuviridae-Like	Hubei orthoptera virus 1	1923009
Riboviria	Chuviridae-Like	Chuviridae-Like	Hubei virga-like virus 9	1923342
Riboviria	Chuviridae-Like	Chuviridae-Like	Hubei tick virus 1	1923252
Riboviria	Chuviridae-Like	Chuviridae-Like	Shahe narna-like virus 5	1923433
Riboviria	Chuviridae-Like	Chuviridae-Like	Changjiang picorna-like virus 4	1922793
Riboviria	Chuviridae-Like	Chuviridae-Like	Beihai sphaeromadae virus 2	1922708
Riboviria	Chuviridae-Like	Chuviridae-Like	Hubei picorna-like virus 56	1923138
Riboviria	Chuviridae-Like	Chuviridae-Like	Hubei tick virus 2	1923253
Riboviria	Chuviridae-Like	Chuviridae-Like	Hubei picorna-like virus 15	1923094
Riboviria	Chuviridae-Like	Chuviridae-Like	Hubei picorna-like virus 40	1923121
Riboviria	Chuviridae-Like	Chuviridae-Like	Changjiang picorna-like virus 3	1922792
Riboviria	Chuviridae-Like	Chuviridae-Like	Shahe narna-like virus 1	1923429
Riboviria	Chuviridae-Like	Chuviridae-Like	Hubei tetragnatha maxillosa virus 4	1923246
Riboviria	Chuviridae-Like	Chuviridae-Like	Hubei picorna-like virus 47	1923128
Riboviria	Chuviridae-Like	Chuviridae-Like	Hubei tick virus 3	1923254
Riboviria	Chuviridae-Like	Chuviridae-Like	Changjiang picorna-like virus 9	1922798
Riboviria	Chuviridae-Like	Chuviridae-Like	Hubei picorna-like virus 44	1923125
Riboviria	Chuviridae-Like	Chuviridae-Like	Beihai tombus-like virus 12	1922715
Riboviria	Chuviridae-Like	Chuviridae-Like	Beihai uca arcuata virus 1	1922736
Riboviria	Chuviridae-Like	Chuviridae-Like	Hubei leech virus 3	1922901
Riboviria	Chuviridae-Like	Chuviridae-Like	Wenzhou narna-like virus 3	1923578
Riboviria	Chuviridae-Like	Chuviridae-Like	Hubei picorna-like virus 54	1923136
Riboviria	Chuviridae-Like	Chuviridae-Like	Wenzhou narna-like virus 2	1923577
Riboviria	Chuviridae-Like	Chuviridae-Like	Hubei tombus-like virus 39	1923287
Riboviria	Chuviridae-Like	Chuviridae-Like	Changjiang crawfish virus 5	1922769
Riboviria	Chuviridae-Like	Chuviridae-Like	Wenling crustacean virus 10	1923479
Riboviria	Chuviridae-Like	Chuviridae-Like	Hubei orthoptera virus 3	1923011
Riboviria	Chuviridae-Like	Chuviridae-Like	Changjiang picorna-like virus 16	1922789
Riboviria	Chuviridae-Like	Chuviridae-Like	Hubei leech virus 4	1922902
Riboviria	Chuviridae-Like	Chuviridae-Like	Hubei tetragnatha maxillosa virus 7	1923249
Riboviria	Chuviridae-Like	Chuviridae-Like	Hubei toti-like virus 2	1923308
Riboviria	Chuviridae-Like	Chuviridae-Like	Hubei toti-like virus 10	1923298
Riboviria	Chuviridae-Like	Chuviridae-Like	Shuangao insect virus 10	1923466
Riboviria	Chuviridae-Like	Chuviridae-Like	Hubei tombus-like virus 4	1923288
Riboviria	Chuviridae-Like	Chuviridae-Like	Hubei narna-like virus 25	1922956
Riboviria	Chuviridae-Like	Chuviridae-Like	Beihai tombus-like virus 19	1922722
Riboviria	Chuviridae-Like	Chuviridae-Like	Shahe qinvirus-like virus 1	1923453
Riboviria	Chuviridae-Like	Chuviridae-Like	Sanxia water strider virus 7	1923406
Riboviria	Chuviridae-Like	Chuviridae-Like	Sanxia water strider virus 9	1923408
Riboviria	Chuviridae-Like	Chuviridae-Like	Sanxia water strider virus 14	1923398
Riboviria	Chuviridae-Like	Chuviridae-Like	Shahe narna-like virus 3	1923431
Riboviria	Chuviridae-Like	Chuviridae-Like	Wenling sobemo-like virus 2	1923541
Riboviria	Chuviridae-Like	Chuviridae-Like	Wenzhou narna-like virus 8	1923583
Riboviria	Chuviridae-Like	Chuviridae-Like	Hubei picorna-like virus 9	1923168
Riboviria	Chuviridae-Like	Chuviridae-Like	Wenling hepe-like virus 2	1923494
Riboviria	Chuviridae-Like	Chuviridae-Like	Wenzhou picorna-like virus 51	1923639
Riboviria	Chuviridae-Like	Chuviridae-Like	Shuangao insect virus 9	1923470
Riboviria	Chuviridae-Like	Chuviridae-Like	Wenling tombus-like virus 5	1923547
Riboviria	Chuviridae-Like	Chuviridae-Like	Wenling toga-like virus	1923542
Riboviria	Chuviridae-Like	Chuviridae-Like	Wenling tombus-like virus 3	1923545
Riboviria	Chuviridae-Like	Chuviridae-Like	Hubei picorna-like virus 50	1923132
Riboviria	Chuviridae-Like	Chuviridae-Like	Wenzhou picorna-like virus 31	1923617
Riboviria	Chuviridae-Like	Chuviridae-Like	Shuangao toti-like virus	1923477
Riboviria	Chuviridae-Like	Chuviridae-Like	Wenzhou picorna-like virus 18	1923602
Riboviria	Chuviridae-Like	Chuviridae-Like	Hubei picorna-like virus 77	1923161
Riboviria	Chuviridae-Like	Chuviridae-Like	Hubei tombus-like virus 27	1923274
Riboviria	Chuviridae-Like	Chuviridae-Like	Hubei picorna-like virus 62	1923145
Riboviria	Chuviridae-Like	Chuviridae-Like	Hubei picorna-like virus 52	1923134
Riboviria	Chuviridae-Like	Chuviridae-Like	Hubei tombus-like virus 21	1923268
Riboviria	Chuviridae-Like	Chuviridae-Like	Hubei picorna-like virus 70	1923154
Riboviria	Chuviridae-Like	Chuviridae-Like	Beihai picorna-like virus 26	1922569
Riboviria	Chuviridae-Like	Chuviridae-Like	Beihai shrimp virus 6	1922672
Riboviria	Chuviridae-Like	Chuviridae-Like	Beihai shrimp virus 5	1922671
Riboviria	Chuviridae-Like	Chuviridae-Like	Beihai picorna-like virus 87	1922634
Riboviria	Chuviridae-Like	Chuviridae-Like	Beihai picorna-like virus 41	1922585
Riboviria	Chuviridae-Like	Chuviridae-Like	Beihai picorna-like virus 82	1922630
Riboviria	Chuviridae-Like	Chuviridae-Like	Beihai picorna-like virus 51	1922596
Riboviria	Chuviridae-Like	Chuviridae-Like	Beihai picorna-like virus 33	1922576
Riboviria	Chuviridae-Like	Chuviridae-Like	Beihai picorna-like virus 91	1922638
Riboviria	Chuviridae-Like	Chuviridae-Like	Beihai picorna-like virus 56	1922601
Riboviria	Chuviridae-Like	Chuviridae-Like	Beihai picorna-like virus 23	1922566
Riboviria	Chuviridae-Like	Chuviridae-Like	Beihai picorna-like virus 116	1922545
Riboviria	Chuviridae-Like	Chuviridae-Like	Beihai picorna-like virus 114	1922543
Riboviria	Chuviridae-Like	Chuviridae-Like	Beihai picorna-like virus 20	1922563
Riboviria	Chuviridae-Like	Chuviridae-Like	Beihai picorna-like virus 122	1922551
Riboviria	Chuviridae-Like	Chuviridae-Like	Beihai picorna-like virus 19	1922561
Riboviria	Chuviridae-Like	Chuviridae-Like	Beihai picorna-like virus 99	1922644
Riboviria	Chuviridae-Like	Chuviridae-Like	Beihai picorna-like virus 106	1922534
Riboviria	Chuviridae-Like	Chuviridae-Like	Beihai picorna-like virus 67	1922613
Riboviria	Chuviridae-Like	Chuviridae-Like	Beihai picorna-like virus 121	1922550
Riboviria	Chuviridae-Like	Chuviridae-Like	Beihai sea slater virus 1	1922657
Riboviria	Chuviridae-Like	Chuviridae-Like	Beihai picorna-like virus 21	1922564
Riboviria	Chuviridae-Like	Chuviridae-Like	Beihai picorna-like virus 28	1922571
Riboviria	Chuviridae-Like	Chuviridae-Like	Beihai picorna-like virus 4	1922583
Riboviria	Chuviridae-Like	Chuviridae-Like	Beihai picorna-like virus 115	1922544
Riboviria	Chuviridae-Like	Chuviridae-Like	Beihai picorna-like virus 107	1922535
Riboviria	Chuviridae-Like	Chuviridae-Like	Beihai picorna-like virus 24	1922567
Riboviria	Chuviridae-Like	Chuviridae-Like	Beihai picorna-like virus 74	1922621
Riboviria	Chuviridae-Like	Chuviridae-Like	Beihai picorna-like virus 17	1922559
Riboviria	Chuviridae-Like	Chuviridae-Like	Beihai picorna-like virus 14	1922556
Riboviria	Chuviridae-Like	Chuviridae-Like	Beihai picorna-like virus 125	1922554
Riboviria	Chuviridae-Like	Chuviridae-Like	Beihai picorna-like virus 85	1922633
Riboviria	Chuviridae-Like	Chuviridae-Like	Beihai sipunculid worm virus 3	1922675
Riboviria	Chuviridae-Like	Chuviridae-Like	Beihai picorna-like virus 72	1922619
Riboviria	Chuviridae-Like	Chuviridae-Like	Beihai picorna-like virus 16	1922558
Riboviria	Chuviridae-Like	Chuviridae-Like	Beihai picorna-like virus 48	1922592
Riboviria	Chuviridae-Like	Chuviridae-Like	Beihai picorna-like virus 118	1922547
Riboviria	Chuviridae-Like	Chuviridae-Like	Beihai picorna-like virus 105	1922533
Riboviria	Chuviridae-Like	Chuviridae-Like	Beihai picorna-like virus 45	1922589
Riboviria	Chuviridae-Like	Chuviridae-Like	Beihai picorna-like virus 123	1922552
Riboviria	Chuviridae-Like	Chuviridae-Like	Beihai picorna-like virus 104	1922532
Riboviria	Chuviridae-Like	Chuviridae-Like	Beihai picorna-like virus 79	1922626
Riboviria	Chuviridae-Like	Chuviridae-Like	Beihai picorna-like virus 46	1922590
Riboviria	Chuviridae-Like	Chuviridae-Like	Beihai picorna-like virus 83	1922631
Riboviria	Chuviridae-Like	Chuviridae-Like	Beihai picorna-like virus 9	1922636
Riboviria	Chuviridae-Like	Chuviridae-Like	Beihai sipunculid worm virus 4	1922676
Riboviria	Chuviridae-Like	Chuviridae-Like	Beihai picorna-like virus 90	1922637
Riboviria	Chuviridae-Like	Chuviridae-Like	Beihai shrimp virus 2	1922668
Riboviria	Chuviridae-Like	Chuviridae-Like	Beihai razor shell virus 1	1922645
Riboviria	Chuviridae-Like	Chuviridae-Like	Beihai picorna-like virus 124	1922553
Riboviria	Chuviridae-Like	Chuviridae-Like	Beihai picorna-like virus 50	1922595
Riboviria	Chuviridae-Like	Chuviridae-Like	Beihai picorna-like virus 63	1922609
Riboviria	Chuviridae-Like	Chuviridae-Like	Beihai picorna-like virus 101	1922529
Riboviria	Chuviridae-Like	Chuviridae-Like	Beihai picorna-like virus 93	1922639
Riboviria	Chuviridae-Like	Chuviridae-Like	Beihai sobemo-like virus 1	1922680
Riboviria	Chuviridae-Like	Chuviridae-Like	Beihai picorna-like virus 49	1922593
Riboviria	Chuviridae-Like	Chuviridae-Like	Beihai picorna-like virus 81	1922629
Riboviria	Chuviridae-Like	Chuviridae-Like	Beihai picorna-like virus 108	1922536
Riboviria	Chuviridae-Like	Chuviridae-Like	Beihai picorna-like virus 96	1922641
Riboviria	Chuviridae-Like	Chuviridae-Like	Beihai picorna-like virus 84	1922632
Riboviria	Chuviridae-Like	Chuviridae-Like	Beihai shrimp virus 1	1922667
Riboviria	Chuviridae-Like	Chuviridae-Like	Beihai picorna-like virus 69	1922615
Riboviria	Chuviridae-Like	Chuviridae-Like	Beihai picorna-like virus 68	1922614
Riboviria	Chuviridae-Like	Chuviridae-Like	Beihai picorna-like virus 102	1922530
Riboviria	Chuviridae-Like	Chuviridae-Like	Beihai sobemo-like virus 11	1922682
Riboviria	Chuviridae-Like	Chuviridae-Like	Beihai picorna-like virus 120	1922549
Riboviria	Chuviridae-Like	Chuviridae-Like	Beihai picorna-like virus 39	1922582
Riboviria	Chuviridae-Like	Chuviridae-Like	Beihai razor shell virus 3	1922647
Riboviria	Chuviridae-Like	Chuviridae-Like	Beihai picorna-like virus 18	1922560
Riboviria	Chuviridae-Like	Chuviridae-Like	Beihai picorna-like virus 111	1922540
Riboviria	Chuviridae-Like	Chuviridae-Like	Beihai sesarmid crab virus 7	1922666
Riboviria	Chuviridae-Like	Chuviridae-Like	Beihai sipunculid worm virus 5	1922677
Riboviria	Chuviridae-Like	Chuviridae-Like	Beihai picorna-like virus 54	1922599
Riboviria	Chuviridae-Like	Chuviridae-Like	Beihai picorna-like virus 71	1922618
Riboviria	Chuviridae-Like	Chuviridae-Like	Beihai shrimp virus 4	1922670
Riboviria	Chuviridae-Like	Chuviridae-Like	Beihai razor shell virus 2	1922646
Riboviria	Chuviridae-Like	Chuviridae-Like	Beihai picorna-like virus 113	1922542
Riboviria	Chuviridae-Like	Chuviridae-Like	Beihai rhabdo-like virus 2	1922652
Riboviria	Chuviridae-Like	Chuviridae-Like	Beihai picorna-like virus 61	1922607
Riboviria	Chuviridae-Like	Chuviridae-Like	Beihai rhabdo-like virus 1	1922651
Riboviria	Chuviridae-Like	Chuviridae-Like	Beihai sipunculid worm virus 2	1922674
Riboviria	Chuviridae-Like	Chuviridae-Like	Beihai picorna-like virus 44	1922588
Riboviria	Chuviridae-Like	Chuviridae-Like	Beihai picorna-like virus 7	1922616
Riboviria	Chuviridae-Like	Chuviridae-Like	Beihai picorna-like virus 77	1922624
Riboviria	Chuviridae-Like	Chuviridae-Like	Beihai picorna-like virus 30	1922573
Riboviria	Chuviridae-Like	Chuviridae-Like	Beihai picorna-like virus 55	1922600
Riboviria	Chuviridae-Like	Chuviridae-Like	Beihai picorna-like virus 27	1922570
Riboviria	Chuviridae-Like	Chuviridae-Like	Beihai picorna-like virus 60	1922606
Riboviria	Chuviridae-Like	Chuviridae-Like	Beihai picorna-like virus 32	1922575
Riboviria	Chuviridae-Like	Chuviridae-Like	Beihai picorna-like virus 6	1922605
Riboviria	Chuviridae-Like	Chuviridae-Like	Beihai rhabdo-like virus 6	1922656
Riboviria	Chuviridae-Like	Chuviridae-Like	Beihai razor shell virus 4	1922648
Riboviria	Chuviridae-Like	Chuviridae-Like	Beihai picorna-like virus 100	1922528
Riboviria	Chuviridae-Like	Chuviridae-Like	Beihai sipunculid worm virus 1	1922673
Riboviria	Chuviridae-Like	Chuviridae-Like	Beihai picorna-like virus 2	1922562
Riboviria	Chuviridae-Like	Chuviridae-Like	Beihai picorna-like virus 40	1922584
Riboviria	Chuviridae-Like	Chuviridae-Like	Beihai picorna-like virus 117	1922546
Riboviria	Chuviridae-Like	Chuviridae-Like	Beihai picorna-like virus 119	1922548
Riboviria	Chuviridae-Like	Chuviridae-Like	Beihai picorna-like virus 64	1922610
Riboviria	Chuviridae-Like	Chuviridae-Like	Beihai picorna-like virus 42	1922586
Riboviria	Chuviridae-Like	Chuviridae-Like	Beihai sesarmid crab virus 2	1922662
Riboviria	Chuviridae-Like	Chuviridae-Like	Beihai picorna-like virus 65	1922611
Riboviria	Chuviridae-Like	Chuviridae-Like	Beihai picorna-like virus 11	1922538
Riboviria	Chuviridae-Like	Chuviridae-Like	Beihai sea slater virus 2	1922658
Riboviria	Chuviridae-Like	Chuviridae-Like	Beihai picorna-like virus 66	1922612
Riboviria	Chuviridae-Like	Chuviridae-Like	Beihai picorna-like virus 1	1922527
Riboviria	Chuviridae-Like	Chuviridae-Like	Beihai picorna-like virus 80	1922628
Riboviria	Chuviridae-Like	Chuviridae-Like	Beihai picorna-like virus 58	1922603
Riboviria	Chuviridae-Like	Chuviridae-Like	Beihai picorna-like virus 112	1922541
Riboviria	Chuviridae-Like	Chuviridae-Like	Beihai sea slater virus 4	1922660
Riboviria	Chuviridae-Like	Chuviridae-Like	Beihai picorna-like virus 110	1922539
Riboviria	Chuviridae-Like	Chuviridae-Like	Beihai picorna-like virus 52	1922597
Riboviria	Chuviridae-Like	Chuviridae-Like	Beihai picorna-like virus 8	1922627
Riboviria	Chuviridae-Like	Chuviridae-Like	Beihai sea slater virus 3	1922659
Riboviria	Chuviridae-Like	Chuviridae-Like	Beihai sesarmid crab virus 1	1922661
Riboviria	Chuviridae-Like	Chuviridae-Like	Beihai picorna-like virus 47	1922591
Riboviria	Chuviridae-Like	Chuviridae-Like	Beihai picorna-like virus 75	1922622
Riboviria	Chuviridae-Like	Chuviridae-Like	Wuhan heteroptera virus 3	1923703
Riboviria	Chuviridae-Like	Chuviridae-Like	Zhejiang mosquito virus 3	1923779
Riboviria	Chuviridae-Like	Chuviridae-Like	Wenzhou narna-like virus 4	1923579
Riboviria	Chuviridae-Like	Chuviridae-Like	Sanxia tombus-like virus 7	1923391
Riboviria	Chuviridae-Like	Chuviridae-Like	Wenzhou picorna-like virus 3	1923615
Riboviria	Chuviridae-Like	Chuviridae-Like	Hubei virga-like virus 18	1923333
Riboviria	Chuviridae-Like	Chuviridae-Like	Wenzhou toti-like virus 1	1923680
Riboviria	Chuviridae-Like	Chuviridae-Like	Shahe isopoda virus 5	1923425
Riboviria	Chuviridae-Like	Chuviridae-Like	narna-like virus 6	1923780
Riboviria	Chuviridae-Like	Chuviridae-Like	Shayang virga-like virus 1	1923463
Riboviria	Chuviridae-Like	Chuviridae-Like	Shahe picorna-like virus 8	1923451
Riboviria	Chuviridae-Like	Chuviridae-Like	Shahe heteroptera virus 2	1923418
Riboviria	Chuviridae-Like	Chuviridae-Like	Hubei tombus-like virus 37	1923285
Riboviria	Chuviridae-Like	Chuviridae-Like	Wenling picorna-like virus 2	1923530
Riboviria	Chuviridae-Like	Chuviridae-Like	Hubei tombus-like virus 34	1923282
Riboviria	Chuviridae-Like	Chuviridae-Like	Hubei toti-like virus 19	1923307
Riboviria	Chuviridae-Like	Chuviridae-Like	Wenzhou shrimp virus 7	1923654
Riboviria	Chuviridae-Like	Chuviridae-Like	Hubei tombus-like virus 32	1923280
Riboviria	Chuviridae-Like	Chuviridae-Like	Beihai noda-like virus 11	1922464
Riboviria	Chuviridae-Like	Chuviridae-Like	Beihai mantis shrimp virus 6	1922433
Riboviria	Chuviridae-Like	Chuviridae-Like	Beihai horseshoe crab virus 1	1922392
Riboviria	Chuviridae-Like	Chuviridae-Like	Beihai barnacle virus 11	1922355
Riboviria	Chuviridae-Like	Chuviridae-Like	Beihai barnacle virus 12	1922356
Riboviria	Chuviridae-Like	Chuviridae-Like	Wuhan pillworm virus 1	1923744
Riboviria	Chuviridae-Like	Chuviridae-Like	Beihai picobirna-like virus 8	1922525
Riboviria	Chuviridae-Like	Chuviridae-Like	Beihai picobirna-like virus 7	1922524
Riboviria	Chuviridae-Like	Chuviridae-Like	Beihai partiti-like virus 2	1922504
Riboviria	Chuviridae-Like	Chuviridae-Like	Beihai narna-like virus 17	1922444
Riboviria	Chuviridae-Like	Chuviridae-Like	Beihai paphia shell virus 4	1922499
Riboviria	Chuviridae-Like	Chuviridae-Like	Beihai paphia shell virus 2	1922497
Riboviria	Chuviridae-Like	Chuviridae-Like	Beihai paphia shell virus 3	1922498
Riboviria	Chuviridae-Like	Chuviridae-Like	Beihai blue swimmer crab virus 1	1922368
Riboviria	Chuviridae-Like	Chuviridae-Like	Beihai narna-like virus 9	1922461
Riboviria	Chuviridae-Like	Chuviridae-Like	Beihai narna-like virus 18	1922445
Riboviria	Chuviridae-Like	Chuviridae-Like	Xingshan nematode virus 1	1923760
Riboviria	Chuviridae-Like	Chuviridae-Like	Beihai octopus virus 2	1922493
Riboviria	Chuviridae-Like	Chuviridae-Like	Beihai mollusks virus 2	1922435
Riboviria	Chuviridae-Like	Chuviridae-Like	Beihai paphia shell virus 1	1922496
Riboviria	Chuviridae-Like	Chuviridae-Like	Beihai hepe-like virus 9	1922386
Riboviria	Chuviridae-Like	Chuviridae-Like	Sanxia water strider virus 15	1923399
Riboviria	Chuviridae-Like	Chuviridae-Like	Beihai narna-like virus 1	1922436
Riboviria	Chuviridae-Like	Chuviridae-Like	Beihai octopus virus 1	1922492
Riboviria	Chuviridae-Like	Chuviridae-Like	Beihai narna-like virus 20	1922448
Riboviria	Chuviridae-Like	Chuviridae-Like	Beihai narna-like virus 11	1922438
Riboviria	Chuviridae-Like	Chuviridae-Like	Beihai narna-like virus 2	1922447
Riboviria	Chuviridae-Like	Chuviridae-Like	Beihai blue swimmer crab virus 3	1922370
Riboviria	Chuviridae-Like	Chuviridae-Like	Beihai mantis shrimp virus 4	1922431
Riboviria	Chuviridae-Like	Chuviridae-Like	Beihai narna-like virus 10	1922437
Riboviria	Chuviridae-Like	Chuviridae-Like	Beihai narna-like virus 8	1922460
Riboviria	Chuviridae-Like	Chuviridae-Like	Beihai narna-like virus 4	1922456
Riboviria	Chuviridae-Like	Chuviridae-Like	Beihai hermit crab virus 1	1922388
Riboviria	Chuviridae-Like	Chuviridae-Like	Beihai narna-like virus 23	1922451
Riboviria	Chuviridae-Like	Chuviridae-Like	Beihai hepe-like virus 8	1922385
Riboviria	Chuviridae-Like	Chuviridae-Like	Hubei tombus-like virus 30	1923278
Riboviria	Chuviridae-Like	Chuviridae-Like	Beihai narna-like virus 12	1922439
Riboviria	Chuviridae-Like	Chuviridae-Like	Hubei tombus-like virus 16	1923262
Riboviria	Chuviridae-Like	Chuviridae-Like	Beihai narna-like virus 6	1922458
Riboviria	Chuviridae-Like	Chuviridae-Like	Beihai hepe-like virus 10	1922381
Riboviria	Chuviridae-Like	Chuviridae-Like	Beihai narna-like virus 24	1922452
Riboviria	Chuviridae-Like	Chuviridae-Like	Beihai charybdis crab virus 1	1922376
Riboviria	Chuviridae-Like	Chuviridae-Like	Beihai narna-like virus 13	1922440
Riboviria	Chuviridae-Like	Chuviridae-Like	Beihai mantis shrimp virus 2	1922429
Riboviria	Chuviridae-Like	Chuviridae-Like	Beihai barnacle virus 4	1922362
Riboviria	Chuviridae-Like	Chuviridae-Like	Beihai mantis shrimp virus 1	1922428
Riboviria	Chuviridae-Like	Chuviridae-Like	Beihai barnacle virus 3	1922361
Riboviria	Chuviridae-Like	Chuviridae-Like	Beihai barnacle virus 2	1922360
Riboviria	Chuviridae-Like	Chuviridae-Like	Beihai mantis shrimp virus 3	1922430
Riboviria	Chuviridae-Like	Chuviridae-Like	Beihai astro-like virus	1922353
Riboviria	Chuviridae-Like	Chuviridae-Like	Beihai anemone virus 1	1922352
Riboviria	Chuviridae-Like	Chuviridae-Like	Beihai mantis shrimp virus 5	1922432
Riboviria	Chuviridae-Like	Chuviridae-Like	Beihai barnacle virus 7	1922365
Riboviria	Chuviridae-Like	Chuviridae-Like	Beihai barnacle virus 8	1922366
Riboviria	Chuviridae-Like	Chuviridae-Like	Beihai barnacle virus 10	1922354
Riboviria	Chuviridae-Like	Chuviridae-Like	Beihai barnacle virus 9	1922367
Riboviria	Chuviridae-Like	Chuviridae-Like	Shahe arthropod virus 1	1923409
Riboviria	Chuviridae-Like	Chuviridae-Like	Beihai narna-like virus 19	1922446
Riboviria	Chuviridae-Like	Chuviridae-Like	Beihai hermit crab virus 3	1922390
Riboviria	Chuviridae-Like	Chuviridae-Like	Beihai narna-like virus 14	1922441
Riboviria	Chuviridae-Like	Chuviridae-Like	Beihai narna-like virus 16	1922443
Riboviria	Chuviridae-Like	Chuviridae-Like	Wenling chuvirus-like virus 2	1922378
Riboviria	Chuviridae-Like	Chuviridae-Like	Beihai barnacle virus 15	1922359
Riboviria	Chuviridae-Like	Chuviridae-Like	Beihai narna-like virus 15	1922442
Riboviria	Chuviridae-Like	Chuviridae-Like	Beihai narna-like virus 26	1922454
Riboviria	Chuviridae-Like	Chuviridae-Like	Wenling chuvirus-like virus 1	1922377
Riboviria	Chuviridae-Like	Chuviridae-Like	Beihai narna-like virus 3	1922455
Riboviria	Chuviridae-Like	Chuviridae-Like	Beihai echinoderm virus 1	1922379
Riboviria	Chuviridae-Like	Chuviridae-Like	Beihai narna-like virus 21	1922449
Riboviria	Chuviridae-Like	Chuviridae-Like	Beihai narna-like virus 22	1922450
Riboviria	Chuviridae-Like	Chuviridae-Like	Sanxia picorna-like virus 12	1923369
Riboviria	Chuviridae-Like	Chuviridae-Like	Hubei tetragnatha maxillosa virus 6	1923248
Riboviria	Chuviridae-Like	Chuviridae-Like	Hubei lepidoptera virus 3	1922905
Riboviria	Chuviridae-Like	Chuviridae-Like	Hubei sobemo-like virus 22	1923208
Riboviria	Chuviridae-Like	Chuviridae-Like	Hubei sobemo-like virus 41	1923229
Riboviria	Chuviridae-Like	Chuviridae-Like	Hubei sobemo-like virus 14	1923199
Riboviria	Chuviridae-Like	Chuviridae-Like	Hubei sobemo-like virus 40	1923228
Riboviria	Chuviridae-Like	Chuviridae-Like	Hubei sobemo-like virus 23	1923209
Riboviria	Chuviridae-Like	Chuviridae-Like	Beihai picorna-like virus 70	1922617
Riboviria	Chuviridae-Like	Chuviridae-Like	Hubei sobemo-like virus 25	1923211
Riboviria	Chuviridae-Like	Chuviridae-Like	Hubei sobemo-like virus 38	1923225
Riboviria	Chuviridae-Like	Chuviridae-Like	Hubei sobemo-like virus 28	1923214
Riboviria	Chuviridae-Like	Chuviridae-Like	Hubei myriapoda virus 8	1922937
Riboviria	Chuviridae-Like	Chuviridae-Like	Hubei myriapoda virus 7	1922936
Riboviria	Chuviridae-Like	Chuviridae-Like	Hubei sobemo-like virus 13	1923198
Riboviria	Chuviridae-Like	Chuviridae-Like	Hubei sobemo-like virus 37	1923224
Riboviria	Chuviridae-Like	Chuviridae-Like	Hubei sobemo-like virus 45	1923233
Riboviria	Chuviridae-Like	Chuviridae-Like	Hubei sobemo-like virus 35	1923222
Riboviria	Chuviridae-Like	Chuviridae-Like	Hubei sobemo-like virus 8	1923241
Riboviria	Chuviridae-Like	Chuviridae-Like	Hubei sobemo-like virus 30	1923217
Riboviria	Chuviridae-Like	Chuviridae-Like	Hubei sobemo-like virus 29	1923215
Riboviria	Chuviridae-Like	Chuviridae-Like	Hubei sobemo-like virus 49	1923237
Riboviria	Chuviridae-Like	Chuviridae-Like	Hubei sobemo-like virus 48	1923236
Riboviria	Chuviridae-Like	Chuviridae-Like	Hubei mosquito virus 4	1922928
Riboviria	Chuviridae-Like	Chuviridae-Like	Changjiang tombus-like virus 15	1922808
Riboviria	Chuviridae-Like	Chuviridae-Like	Hubei sobemo-like virus 24	1923210
Riboviria	Chuviridae-Like	Chuviridae-Like	Hubei sobemo-like virus 27	1923213
Riboviria	Chuviridae-Like	Chuviridae-Like	Hubei sobemo-like virus 33	1923220
Riboviria	Chuviridae-Like	Chuviridae-Like	Beihai picorna-like virus 15	1922557
Riboviria	Chuviridae-Like	Chuviridae-Like	Hubei narna-like virus 18	1922948
Riboviria	Chuviridae-Like	Chuviridae-Like	Hubei polero-like virus 1	1923169
Riboviria	Chuviridae-Like	Chuviridae-Like	Hubei sobemo-like virus 31	1923218
Riboviria	Chuviridae-Like	Chuviridae-Like	Hubei picorna-like virus 31	1923111
Riboviria	Chuviridae-Like	Chuviridae-Like	Beihai sobemo-like virus 14	1922685
Riboviria	Chuviridae-Like	Chuviridae-Like	Beihai sobemo-like virus 17	1922688
Riboviria	Chuviridae-Like	Chuviridae-Like	Hubei myriapoda virus 1	1922930
Riboviria	Chuviridae-Like	Chuviridae-Like	Hubei sobemo-like virus 3	1923216
Riboviria	Chuviridae-Like	Chuviridae-Like	Hubei sobemo-like virus 16	1923201
Riboviria	Chuviridae-Like	Chuviridae-Like	Hubei sobemo-like virus 2	1923205
Riboviria	Chuviridae-Like	Chuviridae-Like	Hubei sobemo-like virus 44	1923232
Riboviria	Chuviridae-Like	Chuviridae-Like	Hubei myriapoda virus 2	1922931
Riboviria	Chuviridae-Like	Chuviridae-Like	Hubei sobemo-like virus 20	1923206
Riboviria	Chuviridae-Like	Chuviridae-Like	Hubei picorna-like virus 46	1923127
Riboviria	Chuviridae-Like	Chuviridae-Like	Hubei sobemo-like virus 1	1923194
Riboviria	Chuviridae-Like	Chuviridae-Like	Beihai picorna-like virus 35	1922578
Riboviria	Chuviridae-Like	Chuviridae-Like	Beihai picorna-like virus 73	1922620
Riboviria	Chuviridae-Like	Chuviridae-Like	Hubei astro-like virus	1922837
Riboviria	Chuviridae-Like	Chuviridae-Like	Beihai tombus-like virus 4	1922725
Riboviria	Chuviridae-Like	Chuviridae-Like	Beihai picorna-like virus 103	1922531
Riboviria	Chuviridae-Like	Chuviridae-Like	Hubei sobemo-like virus 34	1923221
Riboviria	Chuviridae-Like	Chuviridae-Like	Hubei sobemo-like virus 10	1923195
Riboviria	Chuviridae-Like	Chuviridae-Like	Changjiang crawfish virus 4	1922768
Riboviria	Chuviridae-Like	Chuviridae-Like	Hubei sobemo-like virus 5	1923238
Riboviria	Chuviridae-Like	Chuviridae-Like	Hubei sobemo-like virus 7	1923240
Riboviria	Chuviridae-Like	Chuviridae-Like	Hubei sobemo-like virus 46	1923234
Riboviria	Chuviridae-Like	Chuviridae-Like	Beihai picorna-like virus 62	1922608
Riboviria	Chuviridae-Like	Chuviridae-Like	Beihai picorna-like virus 53	1922598
Riboviria	Chuviridae-Like	Chuviridae-Like	Hubei sobemo-like virus 47	1923235
Riboviria	Chuviridae-Like	Chuviridae-Like	Hubei sobemo-like virus 6	1923239
Riboviria	Chuviridae-Like	Chuviridae-Like	Hubei sobemo-like virus 11	1923196
Riboviria	Chuviridae-Like	Chuviridae-Like	Hubei sobemo-like virus 36	1923223
Riboviria	Chuviridae-Like	Chuviridae-Like	Beihai noda-like virus 29	1922483
Riboviria	Chuviridae-Like	Chuviridae-Like	Hubei sobemo-like virus 9	1923242
Riboviria	Chuviridae-Like	Chuviridae-Like	Beihai sobemo-like virus 24	1922696
Riboviria	Chuviridae-Like	Chuviridae-Like	Hubei sobemo-like virus 12	1923197
Riboviria	Chuviridae-Like	Chuviridae-Like	Beihai picorna-like virus 43	1922587
Riboviria	Chuviridae-Like	Chuviridae-Like	Hubei myriapoda virus 3	1922932
Riboviria	Chuviridae-Like	Chuviridae-Like	Changjiang picorna-like virus 1	1922782
Riboviria	Chuviridae-Like	Chuviridae-Like	Hubei sobemo-like virus 26	1923212
Riboviria	Chuviridae-Like	Chuviridae-Like	Hubei sobemo-like virus 18	1923203
Riboviria	Chuviridae-Like	Chuviridae-Like	Hubei sobemo-like virus 19	1923204
Riboviria	Chuviridae-Like	Chuviridae-Like	Hubei earwig virus 3	1922892
Riboviria	Chuviridae-Like	Chuviridae-Like	Hubei leech virus 2	1922900
Riboviria	Chuviridae-Like	Chuviridae-Like	Hubei sobemo-like virus 43	1923231
Riboviria	Chuviridae-Like	Chuviridae-Like	Beihai noda-like virus 5	1922487
Riboviria	Chuviridae-Like	Chuviridae-Like	Beihai sobemo-like virus 10	1922681
Riboviria	Chuviridae-Like	Chuviridae-Like	Beihai sobemo-like virus 26	1922698
Riboviria	Chuviridae-Like	Chuviridae-Like	Hubei sobemo-like virus 32	1923219
Riboviria	Chuviridae-Like	Chuviridae-Like	Hubei sobemo-like virus 42	1923230
Riboviria	Chuviridae-Like	Chuviridae-Like	Hubei noda-like virus 17	1922972
Riboviria	Chuviridae-Like	Chuviridae-Like	Hubei myriapoda virus 4	1922933
Riboviria	Chuviridae-Like	Chuviridae-Like	Hubei sobemo-like virus 15	1923200
Riboviria	Chuviridae-Like	Chuviridae-Like	Hubei picorna-like virus 24	1923104
Riboviria	Chuviridae-Like	Chuviridae-Like	Beihai noda-like virus 18	1922471
Riboviria	Chuviridae-Like	Chuviridae-Like	Beihai picorna-like virus 5	1922594
Riboviria	Chuviridae-Like	Chuviridae-Like	Hubei insect virus 2	1922898
Riboviria	Chuviridae-Like	Chuviridae-Like	Hubei diptera virus 18	1922879
Riboviria	Chuviridae-Like	Chuviridae-Like	Wuhan insect virus 23	1923727
Riboviria	Chuviridae-Like	Chuviridae-Like	Shahe heteroptera virus 3	1923419
Riboviria	Chuviridae-Like	Chuviridae-Like	Hubei odonate virus 9	1923004
Riboviria	Chuviridae-Like	Chuviridae-Like	Beihai barnacle virus 13	1922357
Riboviria	Chuviridae-Like	Chuviridae-Like	Xinzhou partiti-like virus 1	1923776
Riboviria	Chuviridae-Like	Chuviridae-Like	Beihai mollusks virus 1	1922434
Riboviria	Chuviridae-Like	Chuviridae-Like	Wuhan spider virus 2	1923751
Riboviria	Chuviridae-Like	Chuviridae-Like	Beihai hepe-like virus 4	1922387
Riboviria	Chuviridae-Like	Chuviridae-Like	Shahe hepe-like virus 2	1923416
Riboviria	Chuviridae-Like	Chuviridae-Like	Beihai sphaeromadae virus 3	1922709
Riboviria	Chuviridae-Like	Chuviridae-Like	Hubei odonate virus 8	1923003
Riboviria	Chuviridae-Like	Chuviridae-Like	Wuhan large pig roundworm virus 1	1923741
Riboviria	Chuviridae-Like	Chuviridae-Like	Hubei partiti-like virus 11	1923017
Riboviria	Chuviridae-Like	Chuviridae-Like	Shahe hepe-like virus 1	1923415
Riboviria	Chuviridae-Like	Chuviridae-Like	Beihai permutotetra-like virus 2	1922513
Riboviria	Chuviridae-Like	Chuviridae-Like	Hubei narna-like virus 24	1922955
Riboviria	Cruliviridae	Lincruvirus	Wenling crustacean virus 9	1923492
Riboviria	Dicistroviridae	Aparavirus	Israeli acute paralysis virus	294365
Riboviria	Dicistroviridae	Aparavirus	Mud crab virus	932662
Riboviria	Dicistroviridae	Aparavirus	Kashmir bee virus	68876
Riboviria	Dicistroviridae	Aparavirus	Solenopsis invicta virus 1	294369
Riboviria	Dicistroviridae	Aparavirus	Taura syndrome virus	142102
Riboviria	Dicistroviridae	Aparavirus	Acute bee paralysis virus	92444
Riboviria	Dicistroviridae	Cripavirus	Aphis glycines virus 3	2005444
Riboviria	Dicistroviridae	Cripavirus	Anopheles C virus	1769780
Riboviria	Dicistroviridae	Cripavirus	Aphid lethal paralysis virus	209529
Riboviria	Dicistroviridae	Cripavirus	Cricket paralysis virus	12136
Riboviria	Dicistroviridae	Cripavirus	Rhopalosiphum padi virus	66834
Riboviria	Dicistroviridae	Cripavirus	Drosophila C virus	64279
Riboviria	Dicistroviridae	Triatovirus	Homalodisca coagulata virus 1	2170238
Riboviria	Dicistroviridae	Triatovirus	Triatoma virus	103442
Riboviria	Dicistroviridae	Triatovirus	Black queen cell virus	92395
Riboviria	Dicistroviridae	Triatovirus	Himetobi P virus	81583
Riboviria	Dicistroviridae	Triatovirus	Plautia stali intestine virus	64698
Riboviria	Dicistroviridae	unclassified Dicistroviridae	Big Sioux River virus	1041883
Riboviria	Dicistroviridae	unclassified Dicistroviridae	Apis dicistrovirus	1983569
Riboviria	Dicistroviridae	unclassified Dicistroviridae	Macrobrachium rosenbergii Taihu virus	1027947
Riboviria	Dicistroviridae	unclassified Dicistroviridae	Bivalve RNA virus G5	1926968
Riboviria	Dicistroviridae	unclassified Dicistroviridae	Bivalve RNA virus G1	1926967
Riboviria	Dicistroviridae	unclassified Dicistroviridae	Mosquito dicistrovirus	1911442
Riboviria	Dicistroviridae	unclassified Dicistroviridae	Centovirus AC	1916650
Riboviria	Dicistroviridae	unclassified Dicistroviridae	Goose dicistrovirus	1776109
Riboviria	Dicistroviridae	unclassified Dicistroviridae	Formica exsecta virus 1	1432856
Riboviria	Euroniviridae	Charybnivirus	Wenling nido-like virus 1	1923510
Riboviria	Euroniviridae	Charybnivirus	Beihai Nido-like virus 2	1922351
Riboviria	Euroniviridae	Paguronivirus	Beihai hermit crab virus 4	1922391
Riboviria	Flaviviridae	Flavivirus	Royal Farm virus	64288
Riboviria	Flaviviridae	Flavivirus	Kyasanur Forest disease virus	33743
Riboviria	Flaviviridae	Flavivirus	Potiskum virus	64314
Riboviria	Flaviviridae	Flavivirus	Zika virus	64320
Riboviria	Flaviviridae	Flavivirus	T'Ho virus	577122
Riboviria	Flaviviridae	Flavivirus	Ochlerotatus caspius flavivirus	1244565
Riboviria	Flaviviridae	Flavivirus	Yaounde virus	64319
Riboviria	Flaviviridae	Flavivirus	Phnom Penh bat virus	64894
Riboviria	Flaviviridae	Flavivirus	Saumarez Reef virus	40012
Riboviria	Flaviviridae	Flavivirus	Kadam virus	64310
Riboviria	Flaviviridae	Flavivirus	Gadgets Gully virus	64307
Riboviria	Flaviviridae	Flavivirus	Meaban virus	35279
Riboviria	Flaviviridae	Flavivirus	Nounane virus	486494
Riboviria	Flaviviridae	Flavivirus	Jugra virus	64309
Riboviria	Flaviviridae	Flavivirus	Uganda S virus	64297
Riboviria	Flaviviridae	Flavivirus	Saboya virus	64284
Riboviria	Flaviviridae	Flavivirus	Palm Creek virus	1302179
Riboviria	Flaviviridae	Flavivirus	Bouboui virus	64295
Riboviria	Flaviviridae	Flavivirus	Cacipacore virus	64305
Riboviria	Flaviviridae	Flavivirus	Kokobera virus	44024
Riboviria	Flaviviridae	Flavivirus	Japanese encephalitis virus	11072
Riboviria	Flaviviridae	Flavivirus	Murray Valley encephalitis virus	11079
Riboviria	Flaviviridae	Flavivirus	Saint Louis encephalitis virus	11080
Riboviria	Flaviviridae	Flavivirus	New Mapoon virus	499854
Riboviria	Flaviviridae	Flavivirus	Hanko virus	1125677
Riboviria	Flaviviridae	Flavivirus	Chaoyang virus	631267
Riboviria	Flaviviridae	Flavivirus	Donggang virus	985683
Riboviria	Flaviviridae	Flavivirus	Aedes flavivirus	390845
Riboviria	Flaviviridae	Flavivirus	Quang Binh virus	643132
Riboviria	Flaviviridae	Flavivirus	Culex flavivirus	390844
Riboviria	Flaviviridae	Flavivirus	Cell fusing agent virus	31658
Riboviria	Flaviviridae	Flavivirus	Mercadeo virus	1708574
Riboviria	Flaviviridae	Flavivirus	Parramatta River virus	1708654
Riboviria	Flaviviridae	Flavivirus	Edge Hill virus	64296
Riboviria	Flaviviridae	Flavivirus	West Nile virus	11082
Riboviria	Flaviviridae	Flavivirus	Spondweni virus	64318
Riboviria	Flaviviridae	Flavivirus	Paraiso Escondido virus	1566298
Riboviria	Flaviviridae	Flavivirus	Dengue virus 4	11070
Riboviria	Flaviviridae	Flavivirus	Dengue virus 1	11053
Riboviria	Flaviviridae	Flavivirus	Dengue virus 3	11069
Riboviria	Flaviviridae	Flavivirus	Dengue virus 2	11060
Riboviria	Flaviviridae	Flavivirus	Spanish goat encephalitis virus	1691889
Riboviria	Flaviviridae	Flavivirus	Sokoluk virus	64317
Riboviria	Flaviviridae	Flavivirus	Jutiapa virus	64299
Riboviria	Flaviviridae	Flavivirus	Kama virus	1456752
Riboviria	Flaviviridae	Flavivirus	Tyuleniy virus	40004
Riboviria	Flaviviridae	Flavivirus	Ntaya virus	64292
Riboviria	Flaviviridae	Flavivirus	Mosquito flavivirus	673515
Riboviria	Flaviviridae	Flavivirus	Kamiti River virus	218849
Riboviria	Flaviviridae	Flavivirus	Usutu virus	64286
Riboviria	Flaviviridae	Flavivirus	Tembusu virus	64293
Riboviria	Flaviviridae	Flavivirus	Langat virus	11085
Riboviria	Flaviviridae	Flavivirus	Wesselsbron virus	164416
Riboviria	Flaviviridae	Flavivirus	Bagaza virus	64290
Riboviria	Flaviviridae	Flavivirus	Kedougou virus	64311
Riboviria	Flaviviridae	Flavivirus	Aroa virus	64303
Riboviria	Flaviviridae	Flavivirus	Ilheus virus	59563
Riboviria	Flaviviridae	Flavivirus	Entebbe bat virus	64283
Riboviria	Flaviviridae	Flavivirus	Sepik virus	44026
Riboviria	Flaviviridae	Flavivirus	Modoc virus	64300
Riboviria	Flaviviridae	Flavivirus	Omsk hemorrhagic fever virus	12542
Riboviria	Flaviviridae	Flavivirus	Yokose virus	64294
Riboviria	Flaviviridae	Flavivirus	Rio Bravo virus	64285
Riboviria	Flaviviridae	Flavivirus	Tamana bat virus	161675
Riboviria	Flaviviridae	Flavivirus	Yellow fever virus	11089
Riboviria	Flaviviridae	Flavivirus	Apoi virus	64280
Riboviria	Flaviviridae	Flavivirus	Montana myotis leukoencephalitis virus	64312
Riboviria	Flaviviridae	Flavivirus	Tick-borne encephalitis virus	11084
Riboviria	Flaviviridae	Flavivirus	Powassan virus	11083
Riboviria	Flaviviridae	Flavivirus	Louping ill virus	11086
Riboviria	Flaviviridae	unclassified Flaviviridae	Menghai flavivirus	1963247
Riboviria	Flaviviridae	unclassified Flaviviridae	Mac Peak virus	1969400
Riboviria	Flaviviridae	unclassified Flaviviridae	Karumba virus	1969397
Riboviria	Flaviviridae	unclassified Flaviviridae	Apis flavivirus	1983570
Riboviria	Flaviviridae	unclassified Flaviviridae	Mogiana tick virus	1172985
Riboviria	Flaviviridae	unclassified Flaviviridae	Xishuangbanna aedes flavivirus	1821227
Riboviria	Flaviviridae	unclassified Flaviviridae	Bamaga virus	1805494
Riboviria	Flaviviridae	unclassified Flaviviridae	Anopheles flavivirus variant 1	1903340
Riboviria	Flaviviridae	unclassified Flaviviridae	Nakiwogo virus	667516
Riboviria	Flaviviridae	unclassified Flaviviridae	Lammi virus	649187
Riboviria	Flaviviridae	unclassified Flaviviridae	Ilomantsi virus	1445557
Riboviria	Flaviviridae	unclassified Flaviviridae	Culiseta flavivirus	1821222
Riboviria	Flaviviridae	unclassified Flaviviridae	Macrosiphum euphorbiae virus 1	1685953
Riboviria	Flaviviridae	unclassified Flaviviridae	Nienokoue virus	1286143
Riboviria	Flaviviridae	unclassified Flaviviridae	Jingmen tick virus	1491393
Riboviria	Flaviviridae	unclassified Flaviviridae	Soybean cyst nematode virus 5	1495316
Riboviria	Flaviviridae	unclassified Flaviviridae	Nhumirim virus	1485186
Riboviria	Iflaviridae	Iflavirus	Nilaparvata lugens honeydew virus 1	1267585
Riboviria	Iflaviridae	Iflavirus	Lygus lineolaris virus 1	1072333
Riboviria	Iflaviridae	Iflavirus	Armigeres iflavirus	2018471
Riboviria	Iflaviridae	Iflavirus	Diamondback moth iflavirus	1972700
Riboviria	Iflaviridae	Iflavirus	Bat iflavirus	1958778
Riboviria	Iflaviridae	Iflavirus	Helicoverpa armigera iflavirus	1936269
Riboviria	Iflaviridae	Iflavirus	Moku virus	1906245
Riboviria	Iflaviridae	Iflavirus	Bombyx mori iflavirus	1690666
Riboviria	Iflaviridae	Iflavirus	Dinocampus coccinellae paralysis virus	1541119
Riboviria	Iflaviridae	Iflavirus	Lymantria dispar iflavirus 1	1521188
Riboviria	Iflaviridae	Iflavirus	Heliconius erato iflavirus	1487185
Riboviria	Iflaviridae	Iflavirus	Spodoptera exigua iflavirus 2	1228012
Riboviria	Iflaviridae	Iflavirus	Antheraea pernyi iflavirus	1460071
Riboviria	Iflaviridae	Iflavirus	Formica exsecta virus 2	1432857
Riboviria	Iflaviridae	Iflavirus	Spodoptera exigua iflavirus 1	1111710
Riboviria	Iflaviridae	Iflavirus	Slow bee paralysis virus	458132
Riboviria	Iflaviridae	Iflavirus	Brevicoryne brassicae virus - UK	436447
Riboviria	Iflaviridae	Iflavirus	Deformed wing virus	198112
Riboviria	Iflaviridae	Iflavirus	Varroa destructor virus 1	232800
Riboviria	Iflaviridae	Iflavirus	Ectropis obliqua picorna-like virus	240555
Riboviria	Iflaviridae	Iflavirus	Infectious flacherie virus	12742
Riboviria	Iflaviridae	Iflavirus	Perina nuda virus	170621
Riboviria	Iflaviridae	Iflavirus	Sacbrood virus	89463
Riboviria	Iflaviridae	unclassified Iflaviridae	Chequa iflavirus	2054920
Riboviria	Iflaviridae	unclassified Iflaviridae	Pityohyphantes rubrofasciatus iflavirus	1965238
Riboviria	Iflaviridae	unclassified Iflaviridae	Euscelidius variegatus virus 1	1920698
Riboviria	Iflaviridae	unclassified Iflaviridae	King virus	1911104
Riboviria	Iflaviridae	unclassified Iflaviridae	Opsiphanes invirae iflavirus 1	1675864
Riboviria	Iflaviridae	unclassified Iflaviridae	La Jolla virus	1654357
Riboviria	Iflaviridae	unclassified Iflaviridae	Graminella nigrifrons virus 1	1629132
Riboviria	Iflaviridae	unclassified Iflaviridae	Thaumetopoea pityocampa iflavirus 1	1591444
Riboviria	Iflaviridae	unclassified Iflaviridae	Laodelphax striatellus picorna-like virus 2	1566869
Riboviria	Iflaviridae	unclassified Iflaviridae	Laodelphax striatella honeydew virus 1	1464786
Riboviria	Iflaviridae	unclassified Iflaviridae	Halyomorpha halys virus	1410467
Riboviria	Iflaviridae	unclassified Iflaviridae	Nilaparvata lugens honeydew virus-3	1345662
Riboviria	Iflaviridae	unclassified Iflaviridae	Nilaparvata lugens honeydew virus-2	1345661
Riboviria	Lispiviridae	Arlivirus	Lishi Spider Virus 2	1608058
Riboviria	Medioniviridae	Turrinivirus	Beihai Nido-like virus 1	1922350
Riboviria	Mesoniviridae	Alphamesonivirus	Casuarina virus	1482319
Riboviria	Mesoniviridae	Alphamesonivirus	Cavally virus	1041929
Riboviria	Mesoniviridae	Alphamesonivirus	Nse virus	1286142
Riboviria	Mesoniviridae	Alphamesonivirus	Meno virus	1286141
Riboviria	Mesoniviridae	Alphamesonivirus	Hana virus	1286140
Riboviria	Mesoniviridae	Alphamesonivirus	Nam Dinh virus	325676
Riboviria	Mypoviridae	Hubavirus	Hubei myriapoda virus 5	1922934
Riboviria	Nairoviridae	Orthonairovirus	Thiafora orthonairovirus	1980529
Riboviria	Nairoviridae	Orthonairovirus	Keterrah virus	1712571
Riboviria	Nairoviridae	Orthonairovirus	Hazara virus	11596
Riboviria	Nairoviridae	Orthonairovirus	Kasokero virus	1712570
Riboviria	Nairoviridae	Orthonairovirus	Nairobi sheep disease virus	194540
Riboviria	Nairoviridae	Orthonairovirus	Tacheng Tick Virus 1	1608083
Riboviria	Nairoviridae	Orthonairovirus	Yogue virus	1712572
Riboviria	Nairoviridae	Orthonairovirus	Tofla virus	1615758
Riboviria	Nairoviridae	Orthonairovirus	Leopards Hill virus	1381104
Riboviria	Nairoviridae	Orthonairovirus	Crimean-Congo hemorrhagic fever orthonairovirus	1980519
Riboviria	Nairoviridae	Orthonairovirus	Dugbe orthonairovirus	1980521
Riboviria	Nairoviridae	Shaspivirus	Shayang Spider Virus 1	1608068
Riboviria	Nairoviridae	Striwavirus	Sanxia Water Strider Virus 1	1608060
Riboviria	Nodaviridae	Alphanodavirus	Black beetle virus	12285
Riboviria	Nodaviridae	Alphanodavirus	Nodamura virus	12288
Riboviria	Nodaviridae	Alphanodavirus	Pariacoto virus	103782
Riboviria	Nodaviridae	Alphanodavirus	Flock House virus	12287
Riboviria	Nodaviridae	Alphanodavirus	Boolarra virus	12286
Riboviria	Nodaviridae	unclassified Nodaviridae	Le Blanc nodavirus	1241918
Riboviria	Nodaviridae	unclassified Nodaviridae	Orsay virus	977912
Riboviria	Nodaviridae	unclassified Nodaviridae	Santeuil nodavirus	977913
Riboviria	Nodaviridae	unclassified Nodaviridae	Penaeus vannamei nodavirus	430911
Riboviria	Nodaviridae	unclassified Nodaviridae	Macrobrachium rosenbergii nodavirus	222557
Riboviria	Nyamiviridae	Berhavirus	Beihai rhabdo-like virus 5	1922655
Riboviria	Nyamiviridae	Berhavirus	Beihai rhabdo-like virus 4	1922654
Riboviria	Nyamiviridae	Crustavirus	Wenzhou Crab Virus 1	1608091
Riboviria	Nyamiviridae	Nyavirus	Sierra Nevada virus	1424280
Riboviria	Nyamiviridae	Nyavirus	Nyamanini nyavirus	644610
Riboviria	Nyamiviridae	Nyavirus	Midway nyavirus	644609
Riboviria	Nyamiviridae	Socyvirus	Soybean cyst nematode socyvirus	1034377
Riboviria	Nyamiviridae	Tapwovirus	Wenzhou tapeworm virus 1	1923661
Riboviria	Orthomyxoviridae	Thogotovirus	Dhori thogotovirus	11318
Riboviria	Orthomyxoviridae	Thogotovirus	Thogoto thogotovirus	11569
Riboviria	Peribunyaviridae	Herbevirus	Kibale virus	1406344
Riboviria	Peribunyaviridae	Herbevirus	Tai virus	1406343
Riboviria	Peribunyaviridae	Orthobunyavirus	Wyeomyia orthobunyavirus	273350
Riboviria	Peribunyaviridae	Orthobunyavirus	Tete orthobunyavirus	35319
Riboviria	Peribunyaviridae	Orthobunyavirus	Guaroa virus	80941
Riboviria	Peribunyaviridae	Orthobunyavirus	Main Drain virus	80938
Riboviria	Peribunyaviridae	Orthobunyavirus	Koongol virus	35314
Riboviria	Peribunyaviridae	Orthobunyavirus	Kairi virus	80939
Riboviria	Peribunyaviridae	Orthobunyavirus	Guama virus	1678234
Riboviria	Peribunyaviridae	Orthobunyavirus	Guajara orthobunyavirus	1933272
Riboviria	Peribunyaviridae	Orthobunyavirus	Gamboa virus	35313
Riboviria	Peribunyaviridae	Orthobunyavirus	Catu virus	1678225
Riboviria	Peribunyaviridae	Orthobunyavirus	Bimiti virus	1678224
Riboviria	Peribunyaviridae	Orthobunyavirus	Batama virus	611709
Riboviria	Peribunyaviridae	Orthobunyavirus	Anopheles B virus	35308
Riboviria	Peribunyaviridae	Orthobunyavirus	Lukuni virus	1678227
Riboviria	Peribunyaviridae	Orthobunyavirus	Alajuela virus	1552846
Riboviria	Peribunyaviridae	Orthobunyavirus	Wolkberg virus	1867943
Riboviria	Peribunyaviridae	Orthobunyavirus	Madrid virus	348013
Riboviria	Peribunyaviridae	Orthobunyavirus	Marituba virus	292278
Riboviria	Peribunyaviridae	Orthobunyavirus	Kaeng Khoi virus	307164
Riboviria	Peribunyaviridae	Orthobunyavirus	Capim virus	35312
Riboviria	Peribunyaviridae	Orthobunyavirus	Nyando virus	35316
Riboviria	Peribunyaviridae	Orthobunyavirus	Bwamba orthobunyavirus	35310
Riboviria	Peribunyaviridae	Orthobunyavirus	Caraparu virus	192196
Riboviria	Peribunyaviridae	Orthobunyavirus	Oriboca virus	192199
Riboviria	Peribunyaviridae	Orthobunyavirus	Cat Que virus	1495866
Riboviria	Peribunyaviridae	Orthobunyavirus	Murrumbidgee virus	1406134
Riboviria	Peribunyaviridae	Orthobunyavirus	Brazoran virus	1368616
Riboviria	Peribunyaviridae	Orthobunyavirus	Simbu orthobunyavirus	35306
Riboviria	Peribunyaviridae	Orthobunyavirus	Shamonda orthobunyavirus	159150
Riboviria	Peribunyaviridae	Orthobunyavirus	Sathuperi orthobunyavirus	159141
Riboviria	Peribunyaviridae	Orthobunyavirus	Aino virus	11582
Riboviria	Peribunyaviridae	Orthobunyavirus	Akabane virus	70566
Riboviria	Peribunyaviridae	Orthobunyavirus	Oropouche virus	118655
Riboviria	Peribunyaviridae	Orthobunyavirus	La Crosse virus	11577
Riboviria	Peribunyaviridae	Orthobunyavirus	Bunyamwera virus	35304
Riboviria	Peribunyaviridae	Shangavirus	Shuangao Insect Virus 1	1608075
Riboviria	Peribunyaviridae	Tospovirus	Calla lily chlorotic spot virus	309542
Riboviria	Peribunyaviridae	Tospovirus	Melon severe mosaic tospovirus	485724
Riboviria	Peribunyaviridae	Tospovirus	Pepper chlorotic spot virus	1414655
Riboviria	Peribunyaviridae	Tospovirus	Tospovirus kiwifruit/YXW/2014	1857323
Riboviria	Peribunyaviridae	Tospovirus	Bean necrotic mosaic virus	1033976
Riboviria	Peribunyaviridae	Tospovirus	Groundnut ringspot and Tomato chlorotic spot virus reassortant	1027232
Riboviria	Peribunyaviridae	Tospovirus	Tomato zonate spot virus	460926
Riboviria	Peribunyaviridae	Tospovirus	Melon yellow spot virus	89471
Riboviria	Peribunyaviridae	unclassified Peribunyaviridae	Wenzhou Shrimp Virus 1	1608095
Riboviria	Peribunyaviridae	unclassified Peribunyaviridae	Wenzhou Tick Virus	1608094
Riboviria	Peribunyaviridae	unclassified Peribunyaviridae	Huangpi Tick Virus 1	1608047
Riboviria	Peribunyaviridae	unclassified Peribunyaviridae	Hunter Island virus	1457386
Riboviria	Peribunyaviridae	unclassified Peribunyaviridae	Maprik virus	1590836
Riboviria	Peribunyaviridae	unclassified Peribunyaviridae	Lone Star virus	1219465
Riboviria	Permutotetraviridae	Alphapermutotetravirus	Euprosterna elaeasa virus	186165
Riboviria	Phasmaviridae	Orthophasmavirus	Kigluaik phantom orthophasmavirus	1980539
Riboviria	Phasmaviridae	Orthophasmavirus	Wuhan Mosquito Virus 2	1608127
Riboviria	Phasmaviridae	Orthophasmavirus	Wuhan mosquito virus 1	1608126
Riboviria	Phasmaviridae	Orthophasmavirus	Wuchang Cockroach Virus 1	1608097
Riboviria	Phasmaviridae	Wuhivirus	Wuhan Insect virus 2	1608107
Riboviria	Phenuiviridae	Tenuivirus	Maize stripe tenuivirus	12330
Riboviria	Phenuiviridae	Banyangvirus	Heartland virus	1216928
Riboviria	Phenuiviridae	Beidivirus	Hubei diptera virus 3	1922884
Riboviria	Phenuiviridae	Goukovirus	Yichang Insect virus	1608144
Riboviria	Phenuiviridae	Horwuvirus	Wuhan horsefly Virus	1608139
Riboviria	Phenuiviridae	Hudivirus	Hubei diptera virus 4	1922885
Riboviria	Phenuiviridae	Hudovirus	Hubei lepidoptera virus 1	1922903
Riboviria	Phenuiviridae	Kabutovirus	Kabuto mountain virus	1851087
Riboviria	Phenuiviridae	Phasivirus	Wutai mosquito phasivirus	1980612
Riboviria	Phenuiviridae	Phlebovirus	Punta Toro virus	11587
Riboviria	Phenuiviridae	Phlebovirus	Arrabida virus	1457322
Riboviria	Phenuiviridae	Phlebovirus	Toros virus	1764085
Riboviria	Phenuiviridae	Phlebovirus	Zerdali virus	1764086
Riboviria	Phenuiviridae	Phlebovirus	Uriurana virus	1055750
Riboviria	Phenuiviridae	Phlebovirus	Tapara virus	1926501
Riboviria	Phenuiviridae	Phlebovirus	Munguba virus	1048854
Riboviria	Phenuiviridae	Phlebovirus	Anhanga virus	904722
Riboviria	Phenuiviridae	Phlebovirus	Ambe virus	1926500
Riboviria	Phenuiviridae	Phlebovirus	Urucuri virus	1926502
Riboviria	Phenuiviridae	Phlebovirus	Huangpi Tick Virus 2	1608048
Riboviria	Phenuiviridae	Phlebovirus	Adana virus	1611877
Riboviria	Phenuiviridae	Phlebovirus	Bhanja virus	1213620
Riboviria	Phenuiviridae	Phlebovirus	Arumowot virus	904698
Riboviria	Phenuiviridae	Phlebovirus	Razdan virus	1405807
Riboviria	Phenuiviridae	Phlebovirus	SFTS virus HB29	992212
Riboviria	Phenuiviridae	Phlebovirus	Aguacate virus	1006583
Riboviria	Phenuiviridae	Phlebovirus	Sandfly fever Turkey virus	688699
Riboviria	Phenuiviridae	Phlebovirus	Chandiru virus	629725
Riboviria	Phenuiviridae	Phlebovirus	Rift Valley fever virus	11588
Riboviria	Phenuiviridae	Phlebovirus	Sandfly fever Naples virus	206160
Riboviria	Phenuiviridae	Phlebovirus	Uukuniemi virus	11591
Riboviria	Phenuiviridae	Tenuivirus	Maize stripe tenuivirus	12330
Riboviria	Phenuiviridae	Tenuivirus	Echinochloa hoja blanca tenuivirus	42630
Riboviria	Phenuiviridae	Tenuivirus	Urochloa hoja blanca tenuivirus	55808
Riboviria	Phenuiviridae	Tenuivirus	Iranian wheat stripe tenuivirus	236807
Riboviria	Phenuiviridae	Tenuivirus	Rice hoja blanca tenuivirus	12332
Riboviria	Phenuiviridae	Tenuivirus	Rice stripe tenuivirus	12331
Riboviria	Phenuiviridae	Tenuivirus	Rice grassy stunt tenuivirus	66266
Riboviria	Phenuiviridae	Wubeivirus	Wuhan Fly Virus 1	1608101
Riboviria	Phenuiviridae	Wubeivirus	Hubei diptera virus 5	1922886
Riboviria	Phenuiviridae	Phasivirus	Badu Phasivirus	1980609
Riboviria	Phenuiviridae	Phasivirus	Phasi Charoen-like phasivirus	1980610
Riboviria	Phenuiviridae	Phasivirus	Wutai Mosquito phasivirus	1980612
Riboviria	Polycipiviridae	Chipolycivirus	Hubei picorna-like virus 82	1923167
Riboviria	Polycipiviridae	Hupolycivirus	Hubei picorna-like virus 81	1923166
Riboviria	Polycipiviridae	Sopolycivirus	Solenopsis invicta virus 2	439491
Riboviria	Polycipiviridae	Sopolycivirus	Lasius neglectus virus 1	2018501
Riboviria	Polycipiviridae	Sopolycivirus	Lasius niger virus 1	2018503
Riboviria	Polycipiviridae	Sopolycivirus	Solenopsis invicta virus 4	2018500
Riboviria	Polycipiviridae	Sopolycivirus	Myrmica scabrinodis virus 1	2018502
Riboviria	Polycipiviridae	Sopolycivirus	Shuangao insect virus 8	1923469
Riboviria	Qinviridae	Yingvirus	Wenzhou qinvirus-like virus 2	1923648
Riboviria	Qinviridae	Yingvirus	Sanxia Qinvirus-like virus 1	1923354
Riboviria	Qinviridae	Yingvirus	Hubei qinvirus-like virus 1	1938657
Riboviria	Qinviridae	Yingvirus	Beihai sesarmid crab virus 4	1922664
Riboviria	Reoviridae	Coltivirus	Colorado tick fever virus	46839
Riboviria	Reoviridae	Coltivirus	Eyach virus	62352
Riboviria	Reoviridae	Cypovirus	Choristoneura occidentalis cypovirus 16	480410
Riboviria	Reoviridae	Cypovirus	Dendrolimus punctatus cypovirus 22	1577776
Riboviria	Reoviridae	Cypovirus	Inachis io cypovirus 2	1382295
Riboviria	Reoviridae	Cypovirus	Heliothis armigera cypovirus 5	332585
Riboviria	Reoviridae	Cypovirus	Cypovirus 5	205899
Riboviria	Reoviridae	Cypovirus	Cypovirus 1	205895
Riboviria	Reoviridae	Cypovirus	Cypovirus 14	205908
Riboviria	Reoviridae	Cypovirus	Trichoplusia ni cypovirus 15	134606
Riboviria	Reoviridae	Dinovernavirus	Fako virus	1567404
Riboviria	Reoviridae	Dinovernavirus	Aedes pseudoscutellaris reovirus	341721
Riboviria	Reoviridae	Fijivirus	Oat sterile dwarf virus	73147
Riboviria	Reoviridae	Fijivirus	Maize rough dwarf virus	10989
Riboviria	Reoviridae	Fijivirus	Rice black streaked dwarf virus	10990
Riboviria	Reoviridae	Fijivirus	Southern rice black-streaked dwarf virus	519497
Riboviria	Reoviridae	Fijivirus	Mal de Rio Cuarto virus	185954
Riboviria	Reoviridae	Fijivirus	Fiji disease virus	77698
Riboviria	Reoviridae	Fijivirus	Nilaparvata lugens reovirus	33724
Riboviria	Reoviridae	Orbivirus	Equine encephalosis virus	201490
Riboviria	Reoviridae	Orbivirus	Warrego virus	40062
Riboviria	Reoviridae	Orbivirus	Orungo virus	40058
Riboviria	Reoviridae	Orbivirus	Lebombo virus	40057
Riboviria	Reoviridae	Orbivirus	Eubenangee virus	40056
Riboviria	Reoviridae	Orbivirus	Corriparta virus	40053
Riboviria	Reoviridae	Orbivirus	Orbivirus SX-2017a	1955493
Riboviria	Reoviridae	Orbivirus	Fengkai orbivirus	1692107
Riboviria	Reoviridae	Orbivirus	Chobar Gorge virus	1679172
Riboviria	Reoviridae	Orbivirus	Chenuda virus	40065
Riboviria	Reoviridae	Orbivirus	Wad Medani virus	40067
Riboviria	Reoviridae	Orbivirus	Umatilla virus	40060
Riboviria	Reoviridae	Orbivirus	Changuinola virus	40052
Riboviria	Reoviridae	Orbivirus	Mobuck virus	1408137
Riboviria	Reoviridae	Orbivirus	Wallal virus	40061
Riboviria	Reoviridae	Orbivirus	Peruvian horse sickness virus	356862
Riboviria	Reoviridae	Orbivirus	Yunnan orbivirus	306276
Riboviria	Reoviridae	Orbivirus	African horse sickness virus	40050
Riboviria	Reoviridae	Orbivirus	Palyam virus	40059
Riboviria	Reoviridae	Orbivirus	Bluetongue virus	40051
Riboviria	Reoviridae	Orbivirus	Great Island virus	204269
Riboviria	Reoviridae	Orbivirus	Epizootic hemorrhagic disease virus (serotype 1 / strain New Jersey)	449133
Riboviria	Reoviridae	Orbivirus	Stretch Lagoon orbivirus	559180
Riboviria	Reoviridae	Orbivirus	St Croix River virus	104581
Riboviria	Reoviridae	Oryzavirus	Rice ragged stunt virus	42475
Riboviria	Reoviridae	Phytoreovirus	Wound tumor virus	10987
Riboviria	Reoviridae	Phytoreovirus	Rice dwarf virus	10991
Riboviria	Reoviridae	Phytoreovirus	Homalodisca vitripennis reovirus	411854
Riboviria	Reoviridae	Phytoreovirus	Rice gall dwarf virus	10986
Riboviria	Reoviridae	Seadornavirus	Liao ning virus	246280
Riboviria	Reoviridae	Seadornavirus	Kadipiro virus	104580
Riboviria	Reoviridae	Seadornavirus	Banna virus strain JKT-6423	649604
Riboviria	Reoviridae	Seadornavirus	Banna virus	77763
Riboviria	Reoviridae	unclassified Reoviridae	Lutzomyia reovirus 1	1670669
Riboviria	Reoviridae	unclassified Reoviridae	Operophtera brumata reovirus	352248
Riboviria	Rhabdoviridae	unclassified Rhabdoviridae	Wuhan tick virus 2	1608138
Riboviria	Rhabdoviridae	Almendravirus	Arboretum almendravirus	1972683
Riboviria	Rhabdoviridae	Alphanemrhavirus	Xinzhou nematode virus 4	1923772
Riboviria	Rhabdoviridae	Alphanemrhavirus	Xingshan nematode virus 4	1923763
Riboviria	Rhabdoviridae	Curiovirus	Iriri virus	1620893
Riboviria	Rhabdoviridae	Curiovirus	Itacaiunas virus	490111
Riboviria	Rhabdoviridae	Curiovirus	Rochambeau virus	380435
Riboviria	Rhabdoviridae	Curiovirus	Curionopolis virus	490110
Riboviria	Rhabdoviridae	Cytorhabdovirus	Colocasia bobone disease-associated virus	1775456
Riboviria	Rhabdoviridae	Cytorhabdovirus	Alfalfa dwarf virus	998864
Riboviria	Rhabdoviridae	Cytorhabdovirus	Wuhan Insect virus 6	1608111
Riboviria	Rhabdoviridae	Cytorhabdovirus	Wuhan Insect virus 5	1608110
Riboviria	Rhabdoviridae	Cytorhabdovirus	Wuhan Insect virus 4	1608109
Riboviria	Rhabdoviridae	Cytorhabdovirus	Barley yellow striate mosaic cytorhabdovirus	1985699
Riboviria	Rhabdoviridae	Cytorhabdovirus	Persimmon virus A	1211480
Riboviria	Rhabdoviridae	Cytorhabdovirus	Lettuce yellow mottle virus	471285
Riboviria	Rhabdoviridae	Cytorhabdovirus	Lettuce necrotic yellows virus	32612
Riboviria	Rhabdoviridae	Cytorhabdovirus	Northern cereal mosaic cytorhabdovirus	1985704
Riboviria	Rhabdoviridae	Ephemerovirus	Yata virus	1272960
Riboviria	Rhabdoviridae	Ephemerovirus	Malakal virus	1229186
Riboviria	Rhabdoviridae	Ephemerovirus	Obodhiang virus	380160
Riboviria	Rhabdoviridae	Ephemerovirus	Kotonkan virus	318836
Riboviria	Rhabdoviridae	Ephemerovirus	Bovine ephemeral fever virus	11303
Riboviria	Rhabdoviridae	Hapavirus	Ord River virus	1620895
Riboviria	Rhabdoviridae	Hapavirus	Gray Lodge virus	1272942
Riboviria	Rhabdoviridae	Hapavirus	Joinjakaka virus	1272943
Riboviria	Rhabdoviridae	Hapavirus	La Joya virus	1272946
Riboviria	Rhabdoviridae	Hapavirus	Manitoba virus	1272949
Riboviria	Rhabdoviridae	Hapavirus	Kamese virus	200402
Riboviria	Rhabdoviridae	Hapavirus	Parry Creek virus	318845
Riboviria	Rhabdoviridae	Hapavirus	Mosqueiro virus	200403
Riboviria	Rhabdoviridae	Hapavirus	Hart Park virus	200401
Riboviria	Rhabdoviridae	Hapavirus	Ngaingan hapavirus	1972623
Riboviria	Rhabdoviridae	Hapavirus	Wongabel hapavirus	1972626
Riboviria	Rhabdoviridae	Ledantevirus	Nkolbisson virus	380442
Riboviria	Rhabdoviridae	Ledantevirus	Fukuoka virus	318849
Riboviria	Rhabdoviridae	Ledantevirus	Yongjia Tick Virus 2	1608146
Riboviria	Rhabdoviridae	Ledantevirus	Wuhan Louse Fly Virus 5	1608119
Riboviria	Rhabdoviridae	Ledantevirus	Kolente virus	1428456
Riboviria	Rhabdoviridae	Moussa virus	Moussa virus	698672
Riboviria	Rhabdoviridae	Nucleorhabdovirus	Maize Iranian mosaic nucleorhabdovirus	348823
Riboviria	Rhabdoviridae	Nucleorhabdovirus	Sonchus yellow net nucleorhabdovirus	11307
Riboviria	Rhabdoviridae	Nucleorhabdovirus	Datura yellow vein nucleorhabdovirus	195059
Riboviria	Rhabdoviridae	Nucleorhabdovirus	Eggplant mottled dwarf nucleorhabdovirus	488317
Riboviria	Rhabdoviridae	Nucleorhabdovirus	Potato yellow dwarf nucleorhabdovirus	195060
Riboviria	Rhabdoviridae	Nucleorhabdovirus	Taro vein chlorosis nucleorhabdovirus	303300
Riboviria	Rhabdoviridae	Nucleorhabdovirus	Maize mosaic nucleorhabdovirus	279896
Riboviria	Rhabdoviridae	Nucleorhabdovirus	Maize fine streak nucleorhabdovirus	209854
Riboviria	Rhabdoviridae	Nucleorhabdovirus	Rice yellow stunt nucleorhabdovirus	59380
Riboviria	Rhabdoviridae	Sigmavirus	Drosophila melanogaster sigmavirus AP30	666363
Riboviria	Rhabdoviridae	Sigmavirus	Drosophila obscura sigmavirus 10A	666962
Riboviria	Rhabdoviridae	Sripuvirus	Sripur virus	1620897
Riboviria	Rhabdoviridae	Sripuvirus	Niakha virus	1348439
Riboviria	Rhabdoviridae	Sripuvirus	Oak-Vale virus	318852
Riboviria	Rhabdoviridae	Tibrovirus	Sweetwater Branch virus	1272958
Riboviria	Rhabdoviridae	Tibrovirus	Tibrogargan virus	318844
Riboviria	Rhabdoviridae	unclassified Rhabdoviridae	Diachasmimorpha longicaudata rhabdovirus	1585246
Riboviria	Rhabdoviridae	unclassified Rhabdoviridae	Gata virus	1911435
Riboviria	Rhabdoviridae	unclassified Rhabdoviridae	Orgi virus	1911434
Riboviria	Rhabdoviridae	unclassified Rhabdoviridae	Wuhan Mosquito Virus 9	1608134
Riboviria	Rhabdoviridae	unclassified Rhabdoviridae	Wuhan House Fly Virus 1	1608104
Riboviria	Rhabdoviridae	unclassified Rhabdoviridae	Wuhan Fly Virus 2	1608102
Riboviria	Rhabdoviridae	unclassified Rhabdoviridae	Wuhan Ant Virus	1608100
Riboviria	Rhabdoviridae	unclassified Rhabdoviridae	Taishun Tick Virus	1608090
Riboviria	Rhabdoviridae	unclassified Rhabdoviridae	Tacheng Tick Virus 7	1608089
Riboviria	Rhabdoviridae	unclassified Rhabdoviridae	Tacheng Tick Virus 3	1608085
Riboviria	Rhabdoviridae	unclassified Rhabdoviridae	Wuhan House Fly Virus 2	1608105
Riboviria	Rhabdoviridae	unclassified Rhabdoviridae	Wuhan Louse Fly Virus 10	1608114
Riboviria	Rhabdoviridae	unclassified Rhabdoviridae	Wuhan Insect virus 7	1608112
Riboviria	Rhabdoviridae	unclassified Rhabdoviridae	Shayang Fly Virus 3	1608067
Riboviria	Rhabdoviridae	unclassified Rhabdoviridae	Shayang Fly Virus 2	1608066
Riboviria	Rhabdoviridae	unclassified Rhabdoviridae	Huangpi Tick Virus 3	1608049
Riboviria	Rhabdoviridae	unclassified Rhabdoviridae	Bole Tick Virus 2	1608041
Riboviria	Rhabdoviridae	unclassified Rhabdoviridae	Sanxia Water Strider Virus 5	1608064
Riboviria	Rhabdoviridae	unclassified Rhabdoviridae	Santa barbara virus	1552661
Riboviria	Rhabdoviridae	unclassified Rhabdoviridae	Walkabout Creek virus	1569258
Riboviria	Rhabdoviridae	unclassified Rhabdoviridae	Inhangapi virus	1620892
Riboviria	Rhabdoviridae	unclassified Rhabdoviridae	Culex tritaeniorhynchus rhabdovirus	936308
Riboviria	Rhabdoviridae	unclassified Rhabdoviridae	Spodoptera frugiperda rhabdovirus	1481139
Riboviria	Rhabdoviridae	unclassified Rhabdoviridae	Xiburema virus	1272959
Riboviria	Rhabdoviridae	unclassified Rhabdoviridae	Long Island tick rhabdovirus	1459044
Riboviria	Rhabdoviridae	Vesiculovirus	Morreton vesiculovirus	1972565
Riboviria	Rhabdoviridae	Vesiculovirus	Piry virus	11274
Riboviria	Rhabdoviridae	Vesiculovirus	Cocal virus	50713
Riboviria	Rhabdoviridae	Vesiculovirus	Perinet vesiculovirus	1972569
Riboviria	Rhabdoviridae	Vesiculovirus	Malpais Spring vesiculovirus	1972570
Riboviria	Rhabdoviridae	Vesiculovirus	Isfahan virus	290008
Riboviria	Roniviridae	Okavirus	Gill-associated virus	96491
Riboviria	Solinviviridae	Invictavirus	Solenopsis invicta virus 3	631345
Riboviria	Solinviviridae	Nyfulvavirus	Nylanderia fulva virus 1	1871153
Riboviria	Tobaniviridae	Infratovirus	Xinzhou toro-like virus	1923777
Riboviria	Togaviridae	Alphavirus	Mosso das Pedras virus	2083199
Riboviria	Togaviridae	Alphavirus	Tonate virus	60877
Riboviria	Togaviridae	Alphavirus	Rio Negro virus	332097
Riboviria	Togaviridae	Alphavirus	Pixuna virus	60876
Riboviria	Togaviridae	Alphavirus	Mucambo virus	60875
Riboviria	Togaviridae	Alphavirus	Everglades virus	2083198
Riboviria	Togaviridae	Alphavirus	Cabassou virus	60879
Riboviria	Togaviridae	Alphavirus	Tai Forest alphavirus	1930825
Riboviria	Togaviridae	Alphavirus	Middelburg virus	11023
Riboviria	Togaviridae	Alphavirus	Madariaga virus	1440170
Riboviria	Togaviridae	Alphavirus	Eilat virus	1231903
Riboviria	Togaviridae	Alphavirus	Aura virus	44158
Riboviria	Togaviridae	Alphavirus	Bebaru virus	59305
Riboviria	Togaviridae	Alphavirus	Barmah Forest virus	11020
Riboviria	Togaviridae	Alphavirus	Whataroa virus	48543
Riboviria	Togaviridae	Alphavirus	Southern elephant seal virus	1159195
Riboviria	Togaviridae	Alphavirus	Ndumu virus	59302
Riboviria	Togaviridae	Alphavirus	Fort Morgan virus	48544
Riboviria	Togaviridae	Alphavirus	Getah virus	59300
Riboviria	Togaviridae	Alphavirus	Mayaro virus	59301
Riboviria	Togaviridae	Alphavirus	Ross River virus	11029
Riboviria	Togaviridae	Alphavirus	Chikungunya virus	37124
Riboviria	Togaviridae	Alphavirus	Onyong-nyong virus	2169701
Riboviria	Togaviridae	Alphavirus	Highlands J virus	11024
Riboviria	Togaviridae	Alphavirus	Salmon pancreas disease virus	84589
Riboviria	Togaviridae	Alphavirus	Western equine encephalitis virus	11039
Riboviria	Togaviridae	Alphavirus	Eastern equine encephalitis virus	11021
Riboviria	Togaviridae	Alphavirus	Sleeping disease virus	78540
Riboviria	Togaviridae	Alphavirus	Venezuelan equine encephalitis virus	11036
Riboviria	Togaviridae	Alphavirus	Sindbis virus	11034
Riboviria	Togaviridae	Alphavirus	Semliki Forest virus	11033
Riboviria	Tospoviridae	Orthotospovirus	Watermelon silver mottle tospovirus	1933300
Riboviria	Tospoviridae	Orthotospovirus	Tomato spotted wilt tospovirus	1933298
Riboviria	Tospoviridae	Orthotospovirus	Polygonum ringspot tospovirus	430606
Riboviria	Tospoviridae	Orthotospovirus	Watermelon bud necrosis virus	76052
Riboviria	Tospoviridae	Orthotospovirus	Iris yellow spot virus	60456
Riboviria	Tospoviridae	Orthotospovirus	Tomato chlorotic spot virus	12851
Riboviria	Tospoviridae	Orthotospovirus	Zucchini lethal chlorosis virus	83872
Riboviria	Tospoviridae	Orthotospovirus	Chrysanthemum stem necrosis virus	83871
Riboviria	Tospoviridae	Orthotospovirus	Capsicum chlorosis virus	163325
Riboviria	Tospoviridae	Orthotospovirus	Impatiens necrotic spot virus	11612
Riboviria	Tospoviridae	Orthotospovirus	Groundnut bud necrosis virus	198612
Riboviria	Tospoviridae	Orthotospovirus	Peanut bud necrosis virus	40687
Riboviria	Totiviridae	unclassified Totiviridae	Penaeid shrimp infectious myonecrosis virus	282786
Riboviria	Totiviridae	unclassified Totiviridae	Armigeres subalbatus virus SaX06-AK20	556524
Riboviria	Totiviridae	unclassified Totiviridae	Drosophila melanogaster totivirus SW-2009a	663282
Riboviria	Tymoviridae	Marafivirus	Grapevine rupestris vein feathering virus	204933
Riboviria	Tymoviridae	Marafivirus	Blackberry virus S	670883
Riboviria	Tymoviridae	Marafivirus	Bermuda grass etched-line virus	167478
Riboviria	Tymoviridae	Marafivirus	Peach virus D	1955730
Riboviria	Tymoviridae	Marafivirus	Grapevine asteroid mosaic associated virus	2169998
Riboviria	Tymoviridae	Marafivirus	Nectarine marafivirus M	1778580
Riboviria	Tymoviridae	Marafivirus	Switchgrass mosaic virus	1027869
Riboviria	Tymoviridae	Marafivirus	Olive latent virus 3	626962
Riboviria	Tymoviridae	Marafivirus	Grapevine Syrah virus 1	630199
Riboviria	Tymoviridae	Marafivirus	Citrus sudden death-associated virus	312008
Riboviria	Tymoviridae	Marafivirus	Maize rayado fino virus	59749
Riboviria	Tymoviridae	Marafivirus	Oat blue dwarf virus	56879
Riboviria	Tymoviridae	Tymovirus	Cacao yellow mosaic virus	12150
Riboviria	Tymoviridae	Tymovirus	Belladonna mottle virus	12149
Riboviria	Tymoviridae	Tymovirus	Desmodium yellow mottle virus	70821
Riboviria	Tymoviridae	Tymovirus	Clitoria yellow vein virus	12157
Riboviria	Tymoviridae	Tymovirus	Tomato blistering mosaic virus	1010616
Riboviria	Tymoviridae	Tymovirus	Andean potato mild mosaic virus	1296569
Riboviria	Tymoviridae	Tymovirus	Andean potato latent virus	73819
Riboviria	Tymoviridae	Tymovirus	Asclepias asymptomatic virus	1027880
Riboviria	Tymoviridae	Tymovirus	Chiltepin yellow mosaic virus	688701
Riboviria	Tymoviridae	Tymovirus	Anagyris vein yellowing virus	312275
Riboviria	Tymoviridae	Tymovirus	Plantago mottle virus	312274
Riboviria	Tymoviridae	Tymovirus	Nemesia ring necrosis virus	312009
Riboviria	Tymoviridae	Tymovirus	Scrophularia mottle virus	312273
Riboviria	Tymoviridae	Tymovirus	Diascia yellow mottle virus	547467
Riboviria	Tymoviridae	Tymovirus	Okra mosaic virus	70822
Riboviria	Tymoviridae	Tymovirus	Dulcamara mottle virus	70823
Riboviria	Tymoviridae	Tymovirus	Turnip yellow mosaic virus	12154
Riboviria	Tymoviridae	Tymovirus	Physalis mottle virus	72539
Riboviria	Tymoviridae	Tymovirus	Chayote mosaic virus	71030
Riboviria	Tymoviridae	Tymovirus	Erysimum latent virus	12152
Riboviria	Tymoviridae	Tymovirus	Kennedya yellow mosaic virus	12158
Riboviria	Tymoviridae	Tymovirus	Ononis yellow mosaic virus	12153
Riboviria	Tymoviridae	Tymovirus	Eggplant mosaic virus	12151
Riboviria	unassigned Mononegavirales	Chengtivirus	Tacheng Tick Virus 6	1608088
Riboviria	unassigned Mononegavirales	Wastrivirus	Sanxia water strider virus 4	1608063
Riboviria	unclassified Picornavirales	unclassified Picornavirales	Picorna-like virus AWando15	1983535
Riboviria	unclassified Picornavirales	unclassified Picornavirales	Biomphalaria virus 2	1931370
Riboviria	unclassified Picornavirales	unclassified Picornavirales	Biomphalaria virus 3	1931371
Riboviria	unclassified Picornavirales	unclassified Picornavirales	Biomphalaria virus 1	1931369
Riboviria	unclassified Picornavirales	unclassified Picornavirales	Bivalve RNA virus G3	1926969
Riboviria	unclassified Picornavirales	unclassified Picornavirales	Bivalve RNA virus G2	1926996
Riboviria	unclassified Picornavirales	unclassified Picornavirales	Riptortus pedestris virus-1	1912234
Riboviria	unclassified Picornavirales	unclassified Picornavirales	Kilifi Virus	1654355
Riboviria	unclassified Riboviria	Nesidiocoris tenuis virus	Nesidiocoris tenuis virus	1930921
Riboviria	unclassified Riboviria	Sinaivirus	Lake Sinai virus 1	1041806
Riboviria	unclassified Riboviria	Sinaivirus	Lake Sinai virus 2	1041831
Riboviria	unclassified Riboviria	Sinaivirus	Lake Sinai Virus TO	1983564
Riboviria	unclassified Riboviria	Sinaivirus	Lake Sinai Virus NE	1983561
Riboviria	unclassified Riboviria	Sinaivirus	Lake Sinai Virus SA2	1983563
Riboviria	unclassified Riboviria	Sinaivirus	Lake Sinai Virus SA1	1983562
Riboviria	unclassified Riboviria	Sinaivirus	Lake Sinai virus	1547219
Riboviria	unclassified Riboviria	unclassified dsRNA viruses	Spissistilus festinus virus 1	862943
Riboviria	unclassified Riboviria	unclassified dsRNA viruses	Circulifer tenellus virus 1	862944
Riboviria	unclassified Riboviria	unclassified Riboviria	Adelphocoris suturalis virus	1930920
Riboviria	unclassified Riboviria	unclassified Riboviria	Bivalve hepelivirus G	1926998
Riboviria	unclassified Riboviria	unclassified Riboviria	Bivalve RNA virus G4	1926997
Riboviria	unclassified Riboviria	unclassified Riboviria	Abisko virus	2025595
Riboviria	unclassified Riboviria	unclassified ssRNA viruses	Castlerea virus	1969351
Riboviria	unclassified Riboviria	unclassified ssRNA viruses	Loreto virus	1170422
Riboviria	unclassified Riboviria	unclassified ssRNA viruses	Piura virus	1170425
Riboviria	unclassified Riboviria	unclassified ssRNA viruses	Wuhan Tick Virus 1	1608137
Riboviria	unclassified Riboviria	unclassified ssRNA viruses	Wuhan Louse Fly Virus 9	1608123
Riboviria	unclassified Riboviria	unclassified ssRNA viruses	Wenzhou Crab Virus 3	1608093
Riboviria	unclassified Riboviria	unclassified ssRNA viruses	Shuangao Bedbug Virus 2	1608072
Riboviria	unclassified Riboviria	unclassified ssRNA viruses	Shayang Fly Virus 1	1608065
Riboviria	unclassified Riboviria	unclassified ssRNA viruses	Brejeira virus	1552662
Riboviria	unclassified Riboviria	unclassified ssRNA viruses	Negev virus	1170424
Riboviria	unclassified Riboviria	unclassified ssRNA viruses	Wuhan centipede virus	1746069
Riboviria	unclassified Riboviria	unclassified ssRNA viruses	Wuhan cricket virus	1746070
Riboviria	unclassified Riboviria	unclassified ssRNA viruses	Wuhan flea virus	1746071
Riboviria	unclassified Riboviria	unclassified ssRNA viruses	Shuangao insect virus 7	1746063
Riboviria	unclassified Riboviria	unclassified ssRNA viruses	Wuhan aphid virus 1	1746067
Riboviria	unclassified Riboviria	unclassified ssRNA viruses	Wuhan aphid virus 2	1746068
Riboviria	unclassified Riboviria	unclassified ssRNA viruses	Beihai barnacle viurs 1	1746057
Riboviria	unclassified Riboviria	unclassified ssRNA viruses	Shayang fly virus 4	1746061
Riboviria	unclassified Riboviria	unclassified ssRNA viruses	Gamboa mosquito virus	1746059
Riboviria	unclassified Riboviria	unclassified ssRNA viruses	Shuangao lacewing virus 2	1746064
Riboviria	unclassified Riboviria	unclassified ssRNA viruses	Xinzhou spider virus 2	1746073
Riboviria	unclassified Riboviria	unclassified ssRNA viruses	Bole tick virus 4	1746058
Riboviria	unclassified Riboviria	unclassified ssRNA viruses	Xingshan cricket virus	1746072
Riboviria	unclassified Riboviria	unclassified ssRNA viruses	Shayang spider virus 4	1746062
Riboviria	unclassified Riboviria	unclassified ssRNA viruses	Sanxia water strider virus 6	1746060
Riboviria	unclassified Riboviria	unclassified ssRNA viruses	Tacheng tick virus 8	1746065
Riboviria	unclassified Riboviria	unclassified ssRNA viruses	Wuhan Mosquito Virus 8	1608133
Riboviria	unclassified Riboviria	unclassified ssRNA viruses	Tacheng Tick Virus 5	1608087
Riboviria	unclassified Riboviria	unclassified ssRNA viruses	Tacheng Tick Virus 4	1608086
Riboviria	unclassified Riboviria	unclassified ssRNA viruses	Changping Tick Virus 3	1608045
Riboviria	unclassified Riboviria	unclassified ssRNA viruses	Changping Tick Virus 2	1608044
Riboviria	unclassified Riboviria	unclassified ssRNA viruses	Bole Tick Virus 3	1608042
Riboviria	unclassified Riboviria	unclassified ssRNA viruses	Goutanap virus	1560351
Riboviria	unclassified Riboviria	unclassified ssRNA viruses	Drosophila immigrans Nora virus	1500866
Riboviria	unclassified Riboviria	unclassified ssRNA viruses	Drosophila subobscura Nora virus	1500865
Riboviria	unclassified Riboviria	unclassified ssRNA viruses	Wallerfield virus	1457165
Riboviria	unclassified Riboviria	unclassified ssRNA viruses	Nora virus	363716
Riboviria	unclassified Riboviria	unclassified ssRNA viruses	Drosophila A virus	595895
Riboviria	unclassified Riboviria	unclassified ssRNA viruses	Chronic bee paralysis virus	180822
Riboviria	unclassified Riboviria	unclassified ssRNA viruses	Kelp fly virus	340921
Riboviria	unclassified Riboviria	unclassified ssRNA viruses	Acyrthosiphon pisum virus	340187
Viruses	Unclassified Viruses	Unclassified Viruses	Humaita-Tubiacanga virus	1670677
Riboviria	Xinmoviridae	Anphevirus	Xincheng Mosquito Virus	1608141
Riboviria	Xinmoviridae	Anphevirus	Aedes anphevirus	2230910
Riboviria	Yueviridae	Yuyuevirus	Shahe yuevirus-like virus 1	1923457
Riboviria	Yueviridae	Yuyuevirus	Beihai sesarmid crab virus 3	1922663

## Sheet: Families
FAMILIES	GENERA
Alphatetraviridae	Betatetravirus
Birnaviridae	Omegatetravirus
Carmotetraviridae	Entomobirnavirus
Chuviridae	Alphacarmotetravirus
Cruliviridae	Mivirus
Dicistroviridae	Lincruvirus
Euroniviridae	Aparavirus
Flaviviridae	Cripavirus
Iflaviridae	Triatovirus
Lispiviridae	unclassified Dicistroviridae
Medioniviridae	Charybnivirus
Mesoniviridae	Paguronivirus
Mypoviridae	Flavivirus
Nairoviridae	unclassified Flaviviridae
Nodaviridae	Iflavirus
Nyamiviridae	unclassified Iflaviridae
Orthomyxoviridae	Arlivirus
Peribunyaviridae	Turrinivirus
Permutotetraviridae	Alphamesonivirus
Phasmaviridae	Hubavirus
Phenuiviridae	Orthonairovirus
Polycipiviridae	Shaspivirus
Qinviridae	Striwavirus
Reoviridae	Alphanodavirus
Rhabdoviridae	unclassified Nodaviridae
Roniviridae	Berhavirus
Solinviviridae	Crustavirus
Tobaniviridae	Nyavirus
Togaviridae	Socyvirus
Tospoviridae	Tapwovirus
Totiviridae	Thogotovirus
Tymoviridae	Herbevirus
unassigned Mononegavirales	Orthobunyavirus
unclassified Picornavirales	Shangavirus
unclassified Riboviria	Tospovirus
Chuviridae-Like	unclassified Peribunyaviridae
Xinmoviridae	Alphapermutotetravirus
Yueviridae	Orthophasmavirus
	Wuhivirus
	Tenuivirus
	Banyangvirus
	Beidivirus
	Goukovirus
	Horwuvirus
	Hudivirus
	Hudovirus
	Kabutovirus
	Phasivirus
	Phlebovirus
	Wubeivirus
	Chipolycivirus
	Hupolycivirus
	Sopolycivirus
	Yingvirus
	Coltivirus
	Cypovirus
	Dinovernavirus
	Fijivirus
	Orbivirus
	Oryzavirus
	Phytoreovirus
	Seadornavirus
	unclassified Reoviridae
	unclassified Rhabdoviridae
	Almendravirus
	Alphanemrhavirus
	Curiovirus
	Cytorhabdovirus
	Ephemerovirus
	Hapavirus
	Ledantevirus
	Moussa virus
	Nucleorhabdovirus
	Sigmavirus
	Sripuvirus
	Tibrovirus
	Vesiculovirus
	Okavirus
	Invictavirus
	Nyfulvavirus
	Infratovirus
	Alphavirus
	Orthotospovirus
	unclassified Totiviridae
	Marafivirus
	Tymovirus
	Chengtivirus
	Wastrivirus
	unclassified Picornavirales
	Nesidiocoris tenuis virus
	Sinaivirus
	unclassified dsRNA viruses
	unclassified Riboviria
	unclassified RNA viruses ShiM-2016
	unclassified ssRNA viruses
	Anphevirus
	Yuyuevirus
