# Supplementary material for: Improved reference genome of the arboviral vector Aedes albopictus
Source: Genome Biol. 2020 Aug 26;21:215. doi: 10.1186/s13059-020-02141-w (PMC7448346; doi:10.1186/s13059-020-02141-w)
Supplement: Supplementary file 5 — Additional file 5: Database of nrEVEs in the Aedes albopictus genome (AalbF2). [file 13059_2020_2141_MOESM5_ESM.xlsx]

## Sheet: nrEVE
Additional file 5
Database of nrEVEs annotated in AalbF2
							Best viral hit versus NCBI nr database										Best viral hit versus NCBI RefSeq database										TE analysis in the 1 kb upstream each NIRVS								TE analysis in the 1 kb downstream each NIRVS								piRNA clusters
Name	Scaffold	Scaffold ID (NCBI RefSeq)	Start	End	Strand	Len	Family	Viral Species (Subject)	Evalue	Percentage of Identity	Query Coverage	Subject Start	Subject End	Subject Lenght	Viral species TaxId	Viral species Accession	Family	Viral Species (Subject)	Evalue	Percentage of Identity	Query Coverage	Subject Start	Subject End	Subject Lenght	Viral species TaxId	Viral species Accession	Start	Stop	Strand	Evalue	Class	Subclass	TE_name	TE_len	Start	Stop	Strand	Evalue	Class	Subclass	TE_name	TE_len	Cluster name	Cluster start	Cluster end	Cluster size	piRNAs	Unique piRNAs
Canu_ChuLike1	scaffold_1	NW_021837045.1	2361955	2362971	+	1016	Chuviridae-like	Chuvirus Mos8Chu0	9.25e-66	39.441	95	3	323	665	1925502	API61888.1	putative glycoprotein	Hubei chuvirus-like virus 3	3.3e-39	31.776	94	12	326	688	1922858	YP_009337090.1	2360957	2361650	+	6.97e-80	LTR		rnd-5_family-200	5156	2362972	2363220	-	5.71e-119	Unknown		rnd-1_family-718	312
Canu_ChuLike2	scaffold_1	NW_021837045.1	2363216	2364211	+	995	Chuviridae-like	Guato virus	0	99.648	86	1	284	289	1795437	ANW72248.1	hypothetical protein	Dendrolimus punctatus cypovirus 22	2.81e-55	31.429	94	330	640	662	1577776	YP_009111331.1	2362962	2363216	-	3.16e-122	Unknown		rnd-1_family-718	312	2364508	2364930	-	0	Unknown		rnd-5_family-3772	427
Canu_ChuLike3	scaffold_1	NW_021837045.1	10726148	10726771	+	623	Chuviridae-like	Chuvirus Mos8Chu0	4.02e-31	38.462	91	5	195	665	1925502	API61888.1	putative glycoprotein	Hubei chuvirus-like virus 3	3.78e-20	33.14	82	30	201	688	1922858	YP_009337090.1	10725149	10725994	+	0	LTR		rnd-5_family-200	5156	10726772	10727446	+	0	LTR		rnd-5_family-200	5156
Canu_ChuLike4	scaffold_1	NW_021837045.1	27457956	27459869	-	1913	Chuviridae-like	Chuvirus Mos8Chu0	0	40.735	97	5	625	665	1925502	API61888.1	glycoprotein	Wuhan Mosquito Virus 8	2.31e-111	31.457	94	1	599	653	1608133	YP_009177720.1	27457358	27457956	-	0	LTR		rnd-5_family-200	5156	27459870	27460869	-	0	LTR		rnd-5_family-200	5156
Canu_ChuLike5	scaffold_1	NW_021837045.1	28576140	28578008	-	1868	Chuviridae-like	Chuvirus Mos8Chu0	2.29e-153	39.206	92	3	580	665	1925502	API61888.1	glycoprotein	Wuhan Mosquito Virus 8	6.35e-92	29.138	92	1	575	653	1608133	YP_009177720.1	28575141	28575861	-	0	DNA		rnd-5_family-202	1577	28578322	28579008	-	7.95e-73	LTR		rnd-5_family-200	5156
Canu_Un1	scaffold_1	NW_021837045.1	30590431	30591908	+	1477	Unclassified	Kaiowa virus	1e-148	97.2	43	14	227	399	1795439	ASV45863.1	putative glycoprotein	Hubei chuvirus-like virus 3	5e-59	27.96	98	13	500	688	1922858	YP_009337090.1
Canu_ChuLike6	scaffold_1	NW_021837045.1	45377206	45379152	-	1946	Chuviridae-like	Chuvirus Mos8Chu0	0	40.867	99	5	649	665	1925502	API61888.1	putative glycoprotein	Hubei chuvirus-like virus 3	1.56e-111	29.516	95	28	644	688	1922858	YP_009337090.1									45379454	45380140	-	1.18e-51	LTR		rnd-5_family-200	5156
Canu_Rhabdo1	scaffold_1	NW_021837045.1	49169057	49170941	+	1884	Rhabdoviridae	Linepithema humile rhabdo-like virus 1	1.28e-79	37.273	86	617	725	2035	2259786	AXA52562.1	RNA-dependent RNA polymerase	Hubei rhabdo-like virus 3	9.47e-69	35.78	88	618	725	2023	1923187	YP_009336889.1	49168058	49168532	+	2.13e-143	LTR	Gypsy	rnd-1_family-651	592	49170942	49171279	+	5.34e-151	DNA		rnd-1_family-1079	394
Canu_Un2	scaffold_1	NW_021837045.1	49171255	49172384	+	1129	Unclassified	Berant virus	4.37e-38	34.343	92	725	913	2014	1888315	AOC55081.1	RNA-dependent RNA polymerase	Hubei rhabdo-like virus 3	3.62e-28	32.653	86	724	909	2023	1923187	YP_009336889.1	49170888	49171255	+	1.17e-165	DNA		rnd-1_family-1079	394	49172824	49173384	-	0	Unknown		rnd-1_family-828	914
Canu_Un3	scaffold_1	NW_021837045.1	53898406	53900322	-	1916	Unclassified	Kaiowa virus	0	70.52	54	1	346	399	1795439	ASV45863.1	glycoprotein	Wuhan Mosquito Virus 8	7.92e-109	31.29	97	5	619	653	1608133	YP_009177720.1																	Cluster32	53900008	53908252	8244	121	7.4
Canu_ChuLike7	scaffold_1	NW_021837045.1	68289283	68290146	+	863	Chuviridae-like	Chuvirus Mos8Chu0	1.18e-49	37.41	96	3	279	665	1925502	API61888.1	putative glycoprotein	Hubei chuvirus-like virus 3	1.69e-30	34.074	93	12	275	688	1922858	YP_009337090.1	68288284	68288978	+	2.96e-78	LTR		rnd-5_family-200	5156	68290147	68291146	-	0	LINE	Penelope	rnd-1_family-383	1535
Canu_ChuLike8	scaffold_1	NW_021837045.1	68298774	68299838	+	1064	Chuviridae-like	Guato virus	1e-173	95.489	73	1	266	289	1795437	ANW72248.1	glycoprotein	Wuhan Mosquito Virus 8	5.84e-60	30.606	91	270	599	653	1608133	YP_009177720.1	68297775	68298300	+	0	LINE	Penelope	rnd-1_family-383	1535	68300068	68300838	+	0	DNA		rnd-5_family-202	1577
Canu_Un135	scaffold_1	NW_021837045.1	105859268	105860442	+	1174	Unclassified	dsRNA virus environmental sample	1.88e-128	64.31	99	433	729	934	1075826	AJT39589.1	hypothetical protein 2	Hubei toti-like virus 10	2.69e-109	57.095	99	389	684	989	1923298	YP_009336493.1	105858269	105858540	+	4.69e-101	Unknown		rnd-1_family-1368	481	105861189	105861442	+	4.39e-114	Unknown		rnd-1_family-332	967
Canu_ChuLike9	scaffold_1	NW_021837045.1	106136363	106137503	+	1140	Chuviridae-like	Chuvirus Mos8Chu0	5.64e-111	80.282	99	388	458	2221	1925502	API61887.1	putative RNA-dependent RNA polymerase	Imjin River virus 1	7.56e-60	50	94	440	629	2159	1758883	YP_009182177.1	106135407	106135586	-	1.44e-69	LINE	CR1	rnd-1_family-353	333	106137559	106137881	+	4.39e-95	LTR	Gypsy	rnd-1_family-630	613	Cluster56	106135373	106139587	4214	71.6	14.6
Canu_ChuLike10	scaffold_1	NW_021837045.1	107033954	107035097	+	1143	Chuviridae-like	Chuvirus Mos8Chu0	1.75e-113	79.474	95	459	648	2221	1925502	API61887.1	putative RNA-dependent RNA polymerase	Imjin River virus 1	2.98e-62	52.105	94	440	629	2159	1758883	YP_009182177.1	107032998	107033315	+	4.38e-152	Unknown		rnd-1_family-1137	318	107035129	107035451	+	1.26e-95	LTR	Gypsy	rnd-1_family-630	613	Cluster57	107030016	107034998	4982	118	62.7
Canu_ChuLike11	scaffold_1	NW_021837045.1	121016372	121018278	+	1906	Chuviridae-like	Guato virus	2.93e-176	99.237	41	5	266	289	1795437	ANW72248.1	putative glycoprotein	Hubei chuvirus-like virus 3	4.04e-70	31.609	95	9	179	688	1922858	YP_009337090.1	121015376	121016043	+	7.95e-73	LTR		rnd-5_family-200	5156	121018517	121019278	+	0	DNA		rnd-5_family-202	1577
Canu_Flavi1	scaffold_1	NW_021837045.1	135123337	135124967	-	1630	Flaviviridae	Aedes flavivirus	0	86.111	90	2899	2970	3341	390845	AGJ91136.1	RNA-dependent RNA polymerase NS5	Aedes flavivirus	0	86.111	90	448	519	890	390845	YP_009259331.1	135122566	135123153	-	1.87e-74	LTR	Gypsy	rnd-5_family-834	6520	135125401	135125569	-	3.62e-20	LTR	Gypsy	rnd-6_family-157	916	Cluster82	135121891	135254985	133094	1560	793
Canu_Un4	scaffold_1	NW_021837045.1	135211898	135212911	-	1013	Unclassified	Hubei rhabdo-like virus 3	6.43e-18	26.462	99	116	461	533	1923187	YP_009336887.1	putative glycoprotein	Hubei rhabdo-like virus 3	4.16e-18	26.462	99	116	461	533	1923187	YP_009336887.1	135210992	135211503	+	5.7e-176	LTR	Gypsy	rnd-1_family-713	517									Cluster82	135121891	135254985	133094	1560	793
Canu_Rhabdo2	scaffold_1	NW_021837045.1	135216623	135218074	-	1451	Rhabdoviridae	Merida-like virus Turkey	3.16e-37	29.305	67	80	410	508	2053815	ATW01053.1	glycoprotein	Grass carp virus	3.6e-33	25.936	73	74	428	508	1288359	YP_009094266.1																	Cluster82	135121891	135254985	133094	1560	793
Canu_Un5	scaffold_1	NW_021837045.1	135228414	135229091	-	677	Unclassified	Hubei virga-like virus 2	5.33e-14	34.375	96	933	1154	3243	1923335	YP_009337412.1	RdRp	Hubei virga-like virus 2	3.45e-14	34.375	96	933	1154	3243	1923335	YP_009337412.1																	Cluster82	135121891	135254985	133094	1560	793
Canu_Un6	scaffold_1	NW_021837045.1	135333219	135333844	+	625	Unclassified	Culex mononega-like virus 2	3.96e-36	47.712	99	267	414	638	2010272	YP_009388620.1	glycoprotein	Culex mononega-like virus 2	2.81e-36	47.712	99	267	414	638	2010272	YP_009388620.1																	Cluster83	135300103	135402499	102396	3810	1519
Canu_Un7	scaffold_1	NW_021837045.1	135350073	135351519	-	1446	Unclassified	Blackford virus	6.41e-93	46	99	500	847	996	1807801	AMO03220.1	hypothetical protein	Hubei virga-like virus 1	9.76e-65	36.937	95	2581	2691	2712	1923324	YP_009337423.1	135349644	135349787	+	1.26e-38	LTR	Gypsy	rnd-1_family-1401	163									Cluster83	135300103	135402499	102396	3810	1519
Canu_Un8	scaffold_1	NW_021837045.1	135372489	135373205	+	716	Unclassified	Hubei partiti-like virus 11	9.7e-13	27.6	99	72	309	475	1923017	YP_009329874.1	hypothetical protein	Hubei partiti-like virus 11	6.27e-13	27.6	99	72	309	475	1923017	YP_009329874.1	135371522	135371668	+	4.13e-13	LTR	Gypsy	rnd-5_family-164	5702	135374013	135374115	+	1.44e-31	LINE	RTE-ORTE	rnd-1_family-860	688	Cluster83	135300103	135402499	102396	3810	1519
Canu_Un9	scaffold_1	NW_021837045.1	135396103	135396645	+	542	Unclassified	Hubei tetragnatha maxillosa virus 8	3.97e-35	37.989	99	238	416	438	1923250	YP_009337887.1	hypothetical protein	Hubei tetragnatha maxillosa virus 8	2.57e-35	37.989	99	238	416	438	1923250	YP_009337887.1									135397055	135397350	+	3.86e-26	LINE	CR1	rnd-1_family-1409	409	Cluster83	135300103	135402499	102396	3810	1519
Canu_Un10	scaffold_1	NW_021837045.1	137085298	137085741	-	443	Unclassified	Hubei tetragnatha maxillosa virus 8	7.89e-25	46.667	91	234	367	461	1923250	YP_009337888.1	Capsid	Hubei tetragnatha maxillosa virus 8	5.1e-25	46.667	91	234	367	461	1923250	YP_009337888.1	137084299	137084728	-	0	LINE	LOA	rnd-3_family-293	4515	137085946	137086722	-	0	LINE	LOA	rnd-1_family-127	4473
Canu_Un11	scaffold_1	NW_021837045.1	137309896	137311324	+	1428	Unclassified	Blackford virus	2.03e-88	43.607	99	500	802	996	1807801	AMO03220.1	hypothetical protein	Xingshan nematode virus 1	2.84e-56	32.597	99	2507	2684	2707	1923760	YP_009333310.1									137311937	137312156	-	1.64e-100	Unknown		rnd-1_family-235	221	Cluster87	137290449	137382641	92192	1032.33	582.667
Canu_Virga1	scaffold_1	NW_021837045.1	137311386	137311736	+	350	Virgaviridae	Bombus-associated virus Vir1	1.24e-29	47.934	99	17	137	176	2511064	QAY29262.1	hypothetical protein	Hubei virga-like virus 12	9.44e-29	48.673	96	23	135	170	1923327	YP_009337823.1									137311937	137312156	-	1.64e-100	Unknown		rnd-1_family-235	221	Cluster87	137290449	137382641	92192	1032.33	582.667
Canu_Rhabdo3	scaffold_1	NW_021837045.1	137325769	137326841	+	1072	Rhabdoviridae	Rhabdovirus 024698	6.91e-27	31.313	84	48	146	508	1094299	AEQ59502.1	glycoprotein	Grass carp virus	5.74e-27	31.313	84	48	146	508	1288359	YP_009094266.1																	Cluster87	137290449	137382641	92192	1032.33	582.667
Canu_Flavi2	scaffold_1	NW_021837045.1	137347323	137347940	+	617	Flaviviridae	Kamiti River virus	7.34e-93	78.947	81	711	881	887	218849	NP_937780.1	NS5 protein	Kamiti River virus	4.75e-93	78.947	81	711	881	887	218849	NP_937780.1	137346525	137347034	-	0	Unknown		rnd-1_family-1395	508									Cluster87	137290449	137382641	92192	1032.33	582.667
Canu_Un12	scaffold_1	NW_021837045.1	137376475	137377017	+	542	Unclassified	Hubei tetragnatha maxillosa virus 8	3.66e-34	37.43	99	238	416	438	1923250	YP_009337887.1	hypothetical protein	Hubei tetragnatha maxillosa virus 8	2.37e-34	37.43	99	238	416	438	1923250	YP_009337887.1									137377427	137377722	+	3.86e-26	LINE	CR1	rnd-1_family-1409	409	Cluster87	137290449	137382641	92192	1032.33	582.667
Canu_ChuLike12	scaffold_1	NW_021837045.1	140706054	140707967	+	1913	Chuviridae-like	Chuvirus Mos8Chu0	0	40.735	97	5	625	665	1925502	API61888.1	glycoprotein	Wuhan Mosquito Virus 8	7.45e-111	31.291	94	1	599	653	1608133	YP_009177720.1	140705055	140706054	+	0	LTR		rnd-5_family-200	5156	140707968	140708562	+	0	LTR		rnd-5_family-200	5156
Canu_ChuLike13	scaffold_1	NW_021837045.1	155732473	155733186	+	713	Chuviridae-like	Beihai partiti-like virus 2	1.25e-28	32	99	118	359	474	1922504	YP_009333351.1	hypothetical protein	Beihai partiti-like virus 2	8.1e-29	32	99	118	359	474	1922504	YP_009333351.1	155732170	155732278	+	9.1e-09	LTR	Gypsy	rnd-1_family-1808	190	155733360	155733699	+	3.84e-140	DNA		rnd-1_family-638	397	Cluster101	155725177	155734891	9714	351	295
Canu_Un13	scaffold_1	NW_021837045.1	172314238	172315413	-	1175	Unclassified	Kaiowa virus	0	66.957	88	1	345	399	1795439	ASV45863.1	glycoprotein	Wuhan Mosquito Virus 8	1.38e-73	33.422	95	230	599	653	1608133	YP_009177720.1	172313642	172314238	-	0	LTR		rnd-5_family-200	5156	172315414	172316413	-	0	LTR		rnd-5_family-200	5156
Canu_ChuLike14	scaffold_1	NW_021837045.1	172315419	172316105	-	686	Chuviridae-like	Chuvirus Mos8Chu0	9.04e-43	39.474	98	5	228	665	1925502	API61888.1	putative glycoprotein	Hubei chuvirus-like virus 3	2.18e-30	33.981	90	30	235	688	1922858	YP_009337090.1	172314420	172315419	-	0	LTR		rnd-5_family-200	5156	172316106	172317105	-	0	LTR		rnd-5_family-200	5156
Canu_ChuLike15	scaffold_1	NW_021837045.1	175451764	175453716	-	1952	Chuviridae-like	Chuvirus Mos8Chu0	0	41.779	92	24	619	665	1925502	API61888.1	putative glycoprotein	Hubei chuvirus-like virus 3	3.26e-104	27.864	99	12	652	688	1922858	YP_009337090.1
Canu_Un136	scaffold_10	NW_021837046.1	5395734	5397101	+	1367	Unclassified	Culex rhabdo-like virus	0	64.516	96	494	958	2122	2010277	AXQ04772.1	putative RNA-dependent RNA polymerase	Tongilchon virus 1	0	62.876	96	493	958	2122	1758878	YP_009182186.1	5395552	5395734	+	2.43e-79	Unknown		rnd-1_family-1311	239	5397114	5397702	-	0	LTR	Gypsy	rnd-1_family-651	592
Canu_Un14	scaffold_10	NW_021837046.1	5839873	5841105	-	1232	Unclassified	Blackford virus	7.98e-113	45.813	99	500	902	996	1807801	AMO03220.1	RdRp	Hubei virga-like virus 9	9.65e-62	32.683	99	2450	2857	2947	1923342	YP_009336553.1	5839271	5839786	+	5.7e-176	LTR	Gypsy	rnd-1_family-713	517									Cluster114	5835949	5844852	8903	250	245
Canu_Rhabdo4	scaffold_10	NW_021837046.1	23893652	23894753	+	1101	Rhabdoviridae	Culex tritaeniorhynchus rhabdovirus	1.87e-30	29.63	89	56	217	503	936308	YP_009094322.1	glycoprotein	Culex tritaeniorhynchus rhabdovirus	1.28e-30	29.63	89	56	217	503	936308	YP_009094322.1																	Cluster127	23891544	23984980	93436	1215	778
Canu_Flavi3	scaffold_10	NW_021837046.1	23925757	23926191	+	434	Flaviviridae	Cell fusing agent virus	6.8e-34	60.656	84	1233	1354	3341	31658	YP_009259257.1	polyprotein	Cell fusing agent virus	4.4e-34	60.656	84	1233	1354	3341	31658	YP_009259257.1																	Cluster127	23891544	23984980	93436	1215	778
Canu_Rhabdo5	scaffold_10	NW_021837046.1	23926217	23927650	+	1433	Rhabdoviridae	Ekpoma virus 1	3e-41	29.912	48.39	111	1118	429	1987020	YP_009505504.1	N protein	Ekpoma virus 1	8e-42	29.21	70	20	353	429	1987020	YP_009505504.1																	Cluster127	23891544	23984980	93436	1215	778
Canu_Flavi4	scaffold_10	NW_021837046.1	23927651	23928116	+	465	Flaviviridae	Aedes flavivirus	4e-53	61.29	75.48	1204	1358	3310	390845	QCD25342.1	flavivirus polyprotein	Aedes flavivirus	1e-53	61.29	100	1209	1363	3341	390845	YP_003029843.1																	Cluster127	23891544	23984980	93436	1215	778
Canu_Flavi5	scaffold_10	NW_021837046.1	23937745	23938804	+	1059	Flaviviridae	Aedes flavivirus	3.38e-129	72.047	96	1019	1272	3310	390845	QCD25342.1	flavivirus polyprotein	Aedes flavivirus	8.64e-129	71.654	96	1024	1277	3341	390845	YP_003029843.1	23936799	23936957	+	9.08e-47	Unknown		rnd-1_family-1289	216									Cluster127	23891544	23984980	93436	1215	778
Canu_Un15	scaffold_10	NW_021837046.1	23940196	23942050	+	1854	Unclassified	Kaiowa virus	1.36e-117	70.635	50	33	158	399	1795439	ASV45863.1	glycoprotein	Wuhan Mosquito Virus 8	2.34e-68	37.755	94	3	97	653	1608133	YP_009177720.1																	Cluster127	23891544	23984980	93436	1215	778
Canu_Rhabdo6	scaffold_10	NW_021837046.1	23945003	23946460	-	1457	Rhabdoviridae	Mavingoni virus	3e-44	26	92	21	426	431	2603829	QED88193.1	N protein	Ekpoma virus 1	1e-44	30.29	68	20	353	429	1987020	YP_009505504.1	23944004	23944650	-	0	LTR	Copia	rnd-1_family-735	961									Cluster127	23891544	23984980	93436	1215	778
Canu_Flavi6	scaffold_10	NW_021837046.1	23946461	23946779	+	318	Flaviviridae	Cell fusing agent virus	3e-85	98	55.77	1211	1341	3341	31658	YP_009259257.1	NS2A protein	Kamiti River virus	2e-35	54	94	116	215	232	218849	NP_937775.1									23947577	23947760	+	1.44e-12	LTR	Gypsy	rnd-5_family-164	5702	Cluster127	23891544	23984980	93436	1215	778
Canu_Flavi7	scaffold_10	NW_021837046.1	23951362	23952579	-	1217	Flaviviridae	Aedes flavivirus	1.37e-172	67.282	93	991	1369	3310	390845	QCD25342.1	flavivirus polyprotein	Aedes flavivirus	8.1e-172	67.018	93	996	1374	3341	390845	YP_003029843.1																	Cluster127	23891544	23984980	93436	1215	778
Canu_ChuLike16	scaffold_10	NW_021837046.1	23956653	23957936	-	1283	Chuviridae-like	Beihai partiti-like virus 2	2.2e-22	25.871	86	77	437	474	1922504	YP_009333351.1	hypothetical protein	Beihai partiti-like virus 2	1.43e-22	25.871	86	77	437	474	1922504	YP_009333351.1	23955680	23956371	+	0	Unknown		rnd-1_family-1290	696	23958130	23958168	+	4.13e-13	LTR	Pao	rnd-1_family-334	133	Cluster127	23891544	23984980	93436	1215	778
Canu_Rhabdo7	scaffold_10	NW_021837046.1	25097603	25098217	-	614	Rhabdoviridae	Grenada mosquito rhabdovirus 1	5.34e-38	37.255	98	270	469	515	2125980	QBQ64911.1	ORF1	Wuhan Mosquito Virus 9	4.03e-31	37.222	87	6	184	279	1608134	YP_009305108.1	25096780	25097299	+	1.03e-172	LTR	Gypsy	rnd-1_family-713	517	25099073	25099217	+	5.02e-50	LTR	Gypsy	rnd-1_family-713	517	Cluster131	25095011	25099991	4980	378	373
Canu_Toti1	scaffold_10	NW_021837046.1	35934208	35936684	+	2476	Totiviridae	Aedes aegypti toti-like virus	0	58.1	98	103	926	926	2607731	QEM39131.1	hypothetical protein 2	Hubei toti-like virus 10	0	52.17	98	166	989	989	1923298	YP_009336493.1	35933474	35933607	+	2.6e-47	DNA	CMC-Chapaev	rnd-1_family-1084	377	35936724	35936881	-	1.64e-62	Unknown		rnd-1_family-819	335	Cluster137	35930038	35994984	64946	801	693
Canu_ChuLike17	scaffold_10	NW_021837046.1	42199310	42201223	+	1913	Chuviridae-like	Chuvirus Mos8Chu0	0	40.735	97	5	625	665	1925502	API61888.1	glycoprotein	Wuhan Mosquito Virus 8	1.84e-111	31.457	94	1	599	653	1608133	YP_009177720.1	42198311	42199310	+	0	LTR		rnd-5_family-200	5156	42201224	42201819	+	0	LTR		rnd-5_family-200	5156
Canu_ChuLike18	scaffold_1005	NW_021837053.1	86713	88586	-	1873	Chuviridae-like	Chuvirus Mos8Chu0	5.69e-137	50	99	551	624	665	1925502	API61888.1	glycoprotein	Wuhan Mosquito Virus 8	1.08e-83	38.182	97	545	599	653	1608133	YP_009177720.1	86120	86713	-	0	LTR		rnd-5_family-200	5156	88587	89586	-	0	LTR		rnd-5_family-200	5156
Canu_Flavi8	scaffold_101	NW_021837058.1	35751	36916	+	1165	Flaviviridae	Aedes flavivirus	4e-80	64.86	63	14	298	305	390845	AXO77495.1	flavivirus polyprotein	Kamiti River virus	2e-79	64.19	90	451	3250	3357	390845	NP_891560.1																	Cluster158	15004	129416	114412	13430	7390
Canu_Flavi9	scaffold_101	NW_021837058.1	52238	52560	+	322	Flaviviridae	La Tina virus	6.14e-24	60.606	98	446	511	3349	2045187	ATL63282.1	truncated polyprotein	Aedes flavivirus	1.32e-23	59.091	98	438	503	1356	390845	YP_009259320.1																	Cluster158	15004	129416	114412	13430	7390
Canu_Flavi10	scaffold_101	NW_021837058.1	52712	53441	+	729	Flaviviridae	Aedes flavivirus	5.02e-73	86.538	92	732	783	890	390845	YP_009259331.1	RNA-dependent RNA polymerase NS5	Aedes flavivirus	3.51e-73	86.538	92	732	783	890	390845	YP_009259331.1																	Cluster158	15004	129416	114412	13430	7390
Canu_Flavi11	scaffold_101	NW_021837058.1	59486	59656	+	170	Flaviviridae	La Tina virus	1.34e-13	57.407	95	446	499	3349	2045187	ATL63282.1	flavivirus polyprotein	Aedes flavivirus	3.21e-13	55.556	95	438	491	3341	390845	YP_003029843.1	59039	59080	+	3.87e-07	DNA	CMC-EnSpm	rnd-1_family-88	727									Cluster158	15004	129416	114412	13430	7390
Canu_Rhabdo8	scaffold_101	NW_021837058.1	84437	84802	+	365	Rhabdoviridae	Grenada mosquito rhabdovirus 1	7.82e-21	38.655	98	274	392	515	2125980	QBQ64911.1	ORF1	Wuhan Mosquito Virus 9	4.53e-16	33.333	99	10	132	279	1608134	YP_009305108.1																	Cluster158	15004	129416	114412	13430	7390
Canu_Phenui1	scaffold_101	NW_021837058.1	116727	116938	+	211	Phenuiviridae	Phasi Charoen-like phasivirus	8.72e-12	59.259	99	28	54	268	1980610	AOE46764.1	Nucleocapsid	Phasi Charoen-like phasivirus	3.08e-11	62.963	99	28	54	268	1980610	YP_009505333.1																	Cluster158	15004	129416	114412	13430	7390
Canu_Un137	scaffold_103	NW_021837080.1	129505	129678	+	173	Unclassified	dsRNA virus environmental sample	1.41e-21	82.456	99	643	697	934	1075826	AJT39589.1	hypothetical protein 2	Hubei toti-like virus 10	4.47e-15	61.404	99	598	652	989	1923298	YP_009336493.1	128506	129086	+	0	DNA		rnd-1_family-403	1421	129689	129866	+	6.11e-87	LINE	I	rnd-1_family-252	180
Canu_Toti2	scaffold_103	NW_021837080.1	129867	130481	+	614	Totiviridae	Aedes aegypti toti-like virus	8e-91	98.48	90	589	793	926	2607731	QEM39133.1	hypothetical protein 2	Hubei toti-like virus 10	1e-31	62.12	93	652	856	989	1923298	YP_009336493.1	129084	129508	-	1.25e-171	DNA		rnd-1_family-403	1421	130715	131028	+	5e-126	Unknown		rnd-1_family-246	397
Canu_Un138	scaffold_103	NW_021837080.1	541164	542546	+	1382	Unclassified	dsRNA virus environmental sample	0	60.96	99	399	877	934	1075826	AJT39589.1	hypothetical protein 2	Hubei toti-like virus 10	4.9e-172	54.071	99	354	832	989	1923298	YP_009336493.1	541005	541152	+	2.6e-28	LTR	Gypsy	rnd-1_family-1398	154	543185	543458	-	2.43e-117	LTR	Gypsy	rnd-1_family-356	364
Canu_Un16	scaffold_103	NW_021837080.1	542643	542885	+	242	Unclassified	Hubei toti-like virus 10	1.09e-12	43.038	98	915	989	989	1923298	YP_009336493.1	hypothetical protein 2	Hubei toti-like virus 10	7.06e-13	43.038	98	915	989	989	1923298	YP_009336493.1									543185	543458	-	2.43e-117	LTR	Gypsy	rnd-1_family-356	364
Canu_Un139	scaffold_1052	NW_021837104.1	84563	84832	-	269	Unclassified	Cumbaru virus	2.53e-31	65.789	85	60	135	157	2027351	ASV45869.1	putative glycoprotein	Hubei chuvirus-like virus 3	1.73e-07	30.986	79	526	596	688	1922858	YP_009337090.1	83913	84563	-	0	LTR		rnd-5_family-200	5156	84833	85390	-	0	LTR		rnd-5_family-200	5156
Canu_ChuLike19	scaffold_1052	NW_021837104.1	84841	85326	-	485	Chuviridae-like	Guato virus	3.78e-86	83.217	88	1	143	289	1795437	ANW72248.1	glycoprotein	Bole Tick Virus 3	3.47e-34	42.675	96	358	514	657	1608042	YP_009177702.1	83913	84841	-	0	LTR		rnd-5_family-200	5156	85377	86326	-	0	LTR		rnd-5_family-200	5156
Canu_Un17	scaffold_107	NW_021837123.1	1909491	1911338	-	1847	Unclassified	Kaiowa virus	0	100	44	1	270	270	1795439	ANW72242.1	putative glycoprotein	Hubei chuvirus-like virus 3	3.42e-109	31.24	98	13	616	688	1922858	YP_009337090.1
Canu_Rhabdo9	scaffold_108	NW_021837134.1	831473	831967	-	494	Rhabdoviridae	Grenada mosquito rhabdovirus 1	2.39e-33	40.373	98	269	428	515	2125980	QBQ64911.1	ORF1	Wuhan Mosquito Virus 9	1.78e-29	38.889	97	9	170	279	1608134	YP_009305108.1	830515	830780	+	1.03e-96	Unknown		rnd-4_family-975	306	832672	832967	+	2.28e-73	RC	Helitron	rnd-6_family-1453	559
Canu_Un18	scaffold_108	NW_021837134.1	1698769	1700775	+	2006	Unclassified	Kaiowa virus	0	99.63	40	1	270	270	1795439	ANW72242.1	putative glycoprotein	Hubei chuvirus-like virus 3	2.38e-105	30.243	97	28	684	688	1922858	YP_009337090.1									1701727	1701774	+	4.71e-06	DNA	Sola-2	rnd-1_family-265	254
Canu_ChuLike20	scaffold_11	NW_021837156.1	11900878	11901243	+	365	Chuviridae-like	Guato virus	4.14e-54	67.797	97	25	142	185	1795437	ANW72251.1	putative glycoprotein	Hubei chuvirus-like virus 3	5.01e-14	31.959	80	526	622	688	1922858	YP_009337090.1	11899879	11900878	+	0	LTR		rnd-5_family-200	5156	11901244	11901861	+	0	LTR		rnd-5_family-200	5156
Canu_ChuLike21	scaffold_11	NW_021837156.1	20799425	20801338	+	1913	Chuviridae-like	Chuvirus Mos8Chu0	0	40.735	97	5	625	665	1925502	API61888.1	glycoprotein	Wuhan Mosquito Virus 8	1.84e-111	31.457	94	1	599	653	1608133	YP_009177720.1	20798426	20799425	+	0	LTR		rnd-5_family-200	5156	20801339	20801935	+	0	LTR		rnd-5_family-200	5156
Canu_Un19	scaffold_11	NW_021837156.1	31935897	31937744	+	1847	Unclassified	Kaiowa virus	0	98.857	57	1	350	399	1795439	ASV45863.1	putative glycoprotein	Hubei chuvirus-like virus 3	4.52e-105	31.24	98	13	616	688	1922858	YP_009337090.1
Canu_Rhabdo10	scaffold_11	NW_021837156.1	38481341	38481797	-	456	Rhabdoviridae	Riverside virus 1	5.04e-27	51.899	99	1119	1197	2122	1803263	AMJ52368.1	putative RNA-dependent RNA polymerase	Tongilchon virus 1	8e-26	49.367	99	1119	1197	2122	1758878	YP_009182186.1	38480344	38481336	+	0	LINE	R1	rnd-6_family-237	4809	38481954	38482263	-	3.62e-39	Unknown		rnd-1_family-734	632
Canu_ChuLike22	scaffold_11	NW_021837156.1	42035675	42037588	-	1913	Chuviridae-like	Chuvirus Mos8Chu0	2.58e-180	40.575	97	5	625	665	1925502	API61888.1	glycoprotein	Wuhan Mosquito Virus 8	8.84e-111	31.457	94	1	599	653	1608133	YP_009177720.1	42035077	42035675	-	0	LTR		rnd-5_family-200	5156	42037589	42038588	-	0	LTR		rnd-5_family-200	5156
Canu_ChuLike23	scaffold_11	NW_021837156.1	50994331	50996250	-	1919	Chuviridae-like	Guato virus	1.29e-179	98.491	41	1	265	289	1795437	ANW72248.1	putative glycoprotein	Hubei chuvirus-like virus 3	4.15e-104	30.643	94	15	613	688	1922858	YP_009337090.1	50993332	50994101	-	0	DNA		rnd-5_family-202	1577	50996564	50997250	-	2.28e-73	LTR		rnd-5_family-200	5156
Canu_Xinmo1	scaffold_11	NW_021837156.1	54266061	54266675	-	614	Xinmoviridae	Aedes aegypti anphevirus	2.4e-52	48.02	92	232	430	647	2059675	AWK27461.1	glycoprotein	Culex mononega-like virus 2	7.69e-50	48.485	90	215	407	638	2010272	YP_009388620.1	54265941	54266044	+	3.62e-20	Unknown		rnd-6_family-864	3757									Cluster207	54260390	54294109	33719	650	298
Canu_Rhabdo11	scaffold_11	NW_021837156.1	54269854	54270441	-	587	Rhabdoviridae	Grenada mosquito rhabdovirus 1	8.36e-38	38.378	93	274	455	515	2125980	QBQ64911.1	ORF1	Wuhan Mosquito Virus 9	2.6e-30	33.503	99	9	205	279	1608134	YP_009305108.1									54271251	54271288	-	1.35e-06	LTR	Pao	rnd-6_family-1451	1611	Cluster207	54260390	54294109	33719	650	298
Canu_Un140	scaffold_11	NW_021837156.1	54447744	54448711	-	967	Unclassified	Culex mononega-like virus 2	1.86e-42	62.5	99	361	407	638	2010272	YP_009388620.1	glycoprotein	Culex mononega-like virus 2	1.28e-42	62.5	99	361	407	638	2010272	YP_009388620.1	54447576	54447744	+	1.44e-31	Unknown		rnd-6_family-864	3757									Cluster209	54440009	54529644	89635	2038.5	1124.5
Canu_Un141	scaffold_11	NW_021837156.1	57196301	57196811	-	510	Unclassified	Culex mononega-like virus 2	5.84e-33	65.333	86	334	407	638	2010272	YP_009388620.1	glycoprotein	Culex mononega-like virus 2	3.76e-33	65.333	86	334	407	638	2010272	YP_009388620.1	57196200	57196284	+	3.62e-20	Unknown		rnd-6_family-864	3757									Cluster211	57185028	57269978	84950	2640	1050
Canu_Un20	scaffold_11	NW_021837156.1	57240452	57240784	-	332	Unclassified	Hubei tetragnatha maxillosa virus 8	2.22e-29	50.943	96	139	244	461	1923250	YP_009337888.1	Capsid	Hubei tetragnatha maxillosa virus 8	1.43e-29	50.943	96	139	244	461	1923250	YP_009337888.1	57239560	57240451	-	3.6e-153	LINE	CR1	rnd-6_family-279	2703	57240785	57241013	-	3.86e-45	LINE	CR1	rnd-6_family-279	2703	Cluster211	57185028	57269978	84950	2640	1050
Canu_Un21	scaffold_11	NW_021837156.1	62133638	62133994	+	356	Unclassified	Hubei tetragnatha maxillosa virus 8	6.32e-27	45.833	99	139	257	461	1923250	YP_009337888.1	Capsid	Hubei tetragnatha maxillosa virus 8	4.09e-27	45.833	99	139	257	461	1923250	YP_009337888.1	62133409	62133637	+	2e-42	LINE	CR1	rnd-6_family-279	2703	62133997	62134602	+	4.12e-89	LINE	CR1	rnd-6_family-279	2703	Cluster215	62116929	62144956	28027	959	258.3
Canu_Rhabdo12	scaffold_11	NW_021837156.1	62139112	62139714	+	602	Rhabdoviridae	Grenada mosquito rhabdovirus 1	1.42e-38	38.693	98	274	469	515	2125980	QBQ64911.1	ORF1	Wuhan Mosquito Virus 9	2.92e-30	33.168	99	10	211	279	1608134	YP_009305108.1									62139773	62140021	+	1.04e-39	LTR	Gypsy	rnd-5_family-1254	8580	Cluster215	62116929	62144956	28027	959	258.3
Canu_ChuLike24	scaffold_111	NW_021837168.1	904883	906692	+	1809	Chuviridae-like	Chuvirus Mos8Chu0	2.59e-135	44.737	99	490	603	665	1925502	API61888.1	glycoprotein	Wuhan Mosquito Virus 8	1.38e-82	37.788	96	270	486	653	1608133	YP_009177720.1	903884	904883	+	0	LTR		rnd-5_family-200	5156	906693	907342	+	0	LTR		rnd-5_family-200	5156
Canu_ChuLike25	scaffold_112	NW_021837179.1	1747409	1749322	+	1913	Chuviridae-like	Chuvirus Mos8Chu0	0	40.735	97	5	625	665	1925502	API61888.1	glycoprotein	Wuhan Mosquito Virus 8	1.84e-111	31.457	94	1	599	653	1608133	YP_009177720.1	1746410	1747271	+	0	LTR		rnd-5_family-200	5156	1749323	1749919	+	0	LTR		rnd-5_family-200	5156
Canu_Un22	scaffold_115	NW_021837212.1	1425324	1427233	+	1909	Unclassified	Kaiowa virus	0	69.006	54	1	342	399	1795439	ASV45863.1	glycoprotein	Wuhan Mosquito Virus 8	7.46e-92	32.558	92	174	599	653	1608133	YP_009177720.1	1424326	1425148	+	0	LTR		rnd-5_family-200	5156	1427914	1428145	+	1.03e-77	DNA	PIF-Harbinger	rnd-1_family-743	933
Canu_Un23	scaffold_117	NW_021837234.1	793871	795744	+	1873	Unclassified	Kaiowa virus	1.28e-177	66.957	55	1	345	399	1795439	ASV45863.1	glycoprotein	Wuhan Mosquito Virus 8	2.42e-91	33.811	96	251	599	653	1608133	YP_009177720.1	793320	793871	+	0	LTR		rnd-5_family-200	5156	795745	796336	+	0	LTR		rnd-5_family-200	5156
Canu_ChuLike26	scaffold_117	NW_021837234.1	970498	972427	+	1929	Chuviridae-like	Chuvirus Mos8Chu0	9.36e-142	41.884	96	3	500	665	1925502	API61888.1	putative glycoprotein	Hubei chuvirus-like virus 3	2.33e-89	33.036	95	524	634	688	1922858	YP_009337090.1	969499	970184	+	9.69e-72	LTR		rnd-5_family-200	5156	972655	973427	+	0	DNA		rnd-5_family-202	1577
Canu_ChuLike27	scaffold_12	NW_021837267.1	817715	819535	-	1820	Chuviridae-like	Guato virus	0	100	45	3	275	281	1795437	ANW72245.1	putative glycoprotein	Hubei chuvirus-like virus 3	1.76e-101	31.589	88	81	613	688	1922858	YP_009337090.1	816716	817539	-	0	DNA		rnd-5_family-202	1577	820003	820526	-	3.38e-52	LTR		rnd-5_family-200	5156
Canu_Rhabdo13	scaffold_12	NW_021837267.1	7792964	7793467	+	503	Rhabdoviridae	Merida-like virus KE-2017a	4.22e-15	28.994	99	1884	2052	2136	1969830	YP_009551692.1	large protein	Culex tritaeniorhynchus rhabdovirus	7.16e-15	31.953	99	1876	2043	2123	936308	YP_009094323.1	7792109	7792622	+	0	LTR	Gypsy	rnd-1_family-713	517	7793565	7794081	-	0	LTR	Gypsy	rnd-1_family-713	517
Canu_ChuLike28	scaffold_12	NW_021837267.1	13386283	13386906	+	623	Chuviridae-like	Chuvirus Mos8Chu0	4.02e-31	38.462	91	5	195	665	1925502	API61888.1	putative glycoprotein	Hubei chuvirus-like virus 3	3.78e-20	33.14	82	30	201	688	1922858	YP_009337090.1	13385284	13386283	+	0	LTR		rnd-5_family-200	5156	13386907	13387581	+	0	LTR		rnd-5_family-200	5156
Canu_ChuLike29	scaffold_12	NW_021837267.1	20368505	20370418	+	1913	Chuviridae-like	Chuvirus Mos8Chu0	0	40.735	97	5	625	665	1925502	API61888.1	glycoprotein	Wuhan Mosquito Virus 8	2.41e-111	31.457	94	1	599	653	1608133	YP_009177720.1	20367506	20368505	+	0	LTR		rnd-5_family-200	5156	20370419	20371016	+	0	LTR		rnd-5_family-200	5156
Canu_ChuLike30	scaffold_12	NW_021837267.1	27788940	27790687	+	1747	Chuviridae-like	Guato virus	5.82e-151	99.355	49	130	284	289	1795437	ANW72248.1	putative glycoprotein	Hubei chuvirus-like virus 3	1.82e-83	35.556	88	524	613	688	1922858	YP_009337090.1	27787979	27788270	-	3.85e-102	Unknown		rnd-6_family-2811	277	27790863	27791687	+	0	DNA		rnd-5_family-202	1577
Canu_Un24	scaffold_12	NW_021837267.1	46115188	46115604	+	416	Unclassified	Tongilchon virus 1	1.54e-28	55.446	73	94	194	522	1758878	YP_009182185.1	putative glycoprotein	Tongilchon virus 1	9.93e-29	55.446	73	94	194	522	1758878	YP_009182185.1	46114624	46114706	+	2.6e-28	DNA	Sola-1	rnd-1_family-521	84
Canu_Un25	scaffold_12	NW_021837267.1	46451483	46453470	-	1987	Unclassified	Kaiowa virus	0	100	41	1	270	270	1795439	ANW72242.1	putative glycoprotein	Hubei chuvirus-like virus 3	4.36e-87	33.74	90	13	258	688	1922858	YP_009337090.1
Canu_Un26	scaffold_12	NW_021837267.1	50476720	50477121	-	401	Unclassified	Tongilchon virus 1	1.36e-28	54.902	76	93	194	522	1758878	YP_009182185.1	putative glycoprotein	Tongilchon virus 1	8.78e-29	54.902	76	93	194	522	1758878	YP_009182185.1	50475886	50475934	-	5.03e-12	Unknown		rnd-1_family-1669	63
Canu_Un27	scaffold_12	NW_021837267.1	53679892	53681739	-	1847	Unclassified	Kaiowa virus	0	100	44	1	270	270	1795439	ANW72242.1	putative glycoprotein	Hubei chuvirus-like virus 3	4.38e-105	31.24	98	13	616	688	1922858	YP_009337090.1	53678895	53678927	-	3.18e-08	Unknown		rnd-1_family-1124	1403
Canu_Un28	scaffold_12	NW_021837267.1	53688514	53690361	-	1847	Unclassified	Kaiowa virus	0	100	44	1	270	270	1795439	ANW72242.1	putative glycoprotein	Hubei chuvirus-like virus 3	4.38e-105	31.24	98	13	616	688	1922858	YP_009337090.1
Canu_ChuLike31	scaffold_12	NW_021837267.1	55377858	55379795	+	1937	Chuviridae-like	Guato virus	0	99.635	42	3	276	281	1795437	ANW72245.1	putative glycoprotein	Hubei chuvirus-like virus 3	1.59e-106	31.186	91	28	613	688	1922858	YP_009337090.1	55376859	55377535	+	2.78e-72	LTR		rnd-5_family-200	5156
Canu_Rhabdo14	scaffold_124	NW_021837312.1	489008	489472	+	464	Rhabdoviridae	Pararge aegeria rhabdovirus	3.34e-47	61.983	78	467	587	2135	1802938	AMK09277.1	large protein	Chandipura virus	1.2e-46	64.463	78	452	572	2092	11272	YP_007641381.1	488457	488967	+	2.59e-180	LTR	Gypsy	rnd-1_family-713	517	489680	490191	-	0	LTR	Gypsy	rnd-1_family-713	517	Cluster292	485329	489955	4626	516	217
Canu_Un29	scaffold_1241	NW_021837314.1	40567	42362	+	1795	Unclassified	Kaiowa virus	0	98.467	56	1	261	399	1795439	ASV45863.1	putative glycoprotein	Hubei chuvirus-like virus 3	2.06e-80	37.5	94	535	606	688	1922858	YP_009337090.1
Canu_Un30	scaffold_1292	NW_021837370.1	34904	36837	-	1933	Unclassified	Kaiowa virus	2.43e-176	64.088	56	1	361	399	1795439	ASV45863.1	putative glycoprotein	Hubei chuvirus-like virus 3	6.66e-90	30.579	92	167	644	688	1922858	YP_009337090.1									37151	37836	-	2.6e-47	LTR		rnd-5_family-200	5156
Canu_Un31	scaffold_13	NW_021837378.1	3324441	3326415	-	1974	Unclassified	Kaiowa virus	0	78.31	54	1	355	399	1795439	ASV45863.1	putative glycoprotein	Hubei chuvirus-like virus 3	2.96e-88	29.255	86	90	652	688	1922858	YP_009337090.1	3323738	3323779	-	1.35e-06	LTR		rnd-5_family-200	5156	3326970	3327324	-	1.64e-24	LTR		rnd-5_family-200	5156
Canu_ChuLike32	scaffold_13	NW_021837378.1	13495137	13497050	-	1913	Chuviridae-like	Chuvirus Mos8Chu0	0	40.735	97	5	625	665	1925502	API61888.1	glycoprotein	Wuhan Mosquito Virus 8	2.31e-111	31.457	94	1	599	653	1608133	YP_009177720.1	13494540	13495137	-	0	LTR		rnd-5_family-200	5156	13497080	13498050	-	0	LTR		rnd-5_family-200	5156
Canu_Un142	scaffold_13	NW_021837378.1	28987147	28988385	+	1238	Unclassified	Culex mononega-like virus 2	7.74e-110	44.554	98	7	403	638	2010272	ASA47320.1	glycoprotein	Culex mononega-like virus 2	6.69e-110	44.717	98	2	403	638	2010272	YP_009388620.1	28986336	28986947	+	0	LTR	Gypsy	rnd-1_family-630	613									Cluster315	28977395	29058520	81125	1191.5	328.5
Canu_Un143	scaffold_13	NW_021837378.1	29037568	29039613	+	2045	Unclassified	Culex mononega-like virus 2	7.34e-172	42.764	90	1	610	638	2010272	YP_009388620.1	glycoprotein	Culex mononega-like virus 2	4.75e-172	42.764	90	1	610	638	2010272	YP_009388620.1																	Cluster315	28977395	29058520	81125	1191.5	328.5
Canu_Un32	scaffold_13	NW_021837378.1	30096177	30096733	-	556	Unclassified	Croada virus	1.47e-53	81.081	72	1	37	186	2027350	ASV45861.1	putative glycoprotein	Imjin River virus 1	2.32e-19	38.462	88	270	321	653	1758883	YP_009182178.1	30095180	30095581	+	0	DNA	hAT-hATm	rnd-1_family-145	715	30096734	30096931	+	9.09e-28	LTR	Gypsy	rnd-5_family-164	5702
Canu_ChuLike33	scaffold_13	NW_021837378.1	30097028	30097879	-	851	Chuviridae-like	Chuvirus Mos8Chu0	2.41e-56	39.483	95	5	275	665	1925502	API61888.1	putative glycoprotein	Hubei chuvirus-like virus 3	6.86e-33	31.047	97	2	275	688	1922858	YP_009337090.1	30096733	30096931	+	2.6e-28	LTR	Gypsy	rnd-5_family-164	5702	30098244	30098351	-	3.87e-07	LINE	I-Jockey	rnd-6_family-2399	344
Canu_ChuLike34	scaffold_13	NW_021837378.1	34714802	34715566	-	764	Chuviridae-like	Chuvirus Mos8Chu0	7.23e-44	41.463	80	24	228	665	1925502	API61888.1	putative glycoprotein	Hubei chuvirus-like virus 3	2.38e-29	33.051	92	2	235	688	1922858	YP_009337090.1	34713803	34714291	+	0	Unknown		rnd-5_family-2045	624
Canu_ChuLike35	scaffold_13	NW_021837378.1	35827767	35829680	-	1913	Chuviridae-like	Chuvirus Mos8Chu0	0	40.735	97	5	625	665	1925502	API61888.1	glycoprotein	Wuhan Mosquito Virus 8	2.31e-111	31.457	94	1	599	653	1608133	YP_009177720.1	35827170	35827767	-	0	LTR		rnd-5_family-200	5156	35829681	35830680	-	0	LTR		rnd-5_family-200	5156
Canu_ChuLike36	scaffold_13	NW_021837378.1	43985078	43987060	+	1982	Chuviridae-like	Guato virus	0	99.648	43	1	284	289	1795437	ANW72248.1	putative glycoprotein	Hubei chuvirus-like virus 3	3.84e-102	30.921	92	12	613	688	1922858	YP_009337090.1	43984080	43984774	+	2.43e-79	LTR		rnd-5_family-200	5156	43987236	43988060	+	0	DNA		rnd-5_family-202	1577
Canu_Un144	scaffold_13	NW_021837378.1	48003024	48004820	+	1796	Unclassified	Culex mononega-like virus 2	5.33e-138	42.907	95	22	591	2079	2010272	ASA47322.1	RdRp	Culex mononega-like virus 2	1.22e-137	42.907	95	22	591	2079	2010272	YP_009388622.1	48002459	48002521	-	9.71e-15	Unknown		rnd-1_family-1685	67	48004821	48005406	-	0	LTR	Gypsy	rnd-1_family-630	613	Cluster331	48000077	48004894	4817	111	101
Canu_Rhabdo15	scaffold_136	NW_021837445.1	945785	946987	-	1202	Rhabdoviridae	Merida virus	1.32e-28	28.07	70	116	400	508	1803034	YP_009552114.1	glycoprotein	Grass carp virus	7.95e-25	24.074	89	106	467	508	1288359	YP_009094266.1	945545	945661	-	5.73e-43	Unknown		rnd-6_family-2017	1467	946988	947775	-	0	DNA	hAT-Tip100	rnd-1_family-568	915
Canu_ChuLike37	scaffold_136	NW_021837445.1	998353	999420	+	1067	Chuviridae-like	Chuvirus Mos8Chu0	3.44e-68	38.576	94	5	340	665	1925502	API61888.1	glycoprotein	Wuhan Mosquito Virus 8	8.94e-40	29.041	99	1	360	653	1608133	YP_009177720.1	997354	998019	+	4.12e-70	LTR		rnd-5_family-200	5156	999421	999698	-	1.53e-132	Unknown		rnd-1_family-1631	335
Canu_ChuLike38	scaffold_136	NW_021837445.1	999663	1000583	+	920	Chuviridae-like	Guato virus	0	99.624	87	1	266	289	1795437	ANW72248.1	hypothetical protein	Dendrolimus punctatus cypovirus 22	1.26e-53	32.45	97	343	640	662	1577776	YP_009111331.1	999365	999663	-	6.09e-144	Unknown		rnd-1_family-1631	335	1000813	1001583	+	0	DNA		rnd-5_family-202	1577
Canu_Un33	scaffold_137	NW_021837456.1	447989	449843	-	1854	Unclassified	Kaiowa virus	3.28e-178	66.957	56	1	345	399	1795439	ASV45863.1	glycoprotein	Wuhan Mosquito Virus 8	2.33e-87	34.653	96	58	157	653	1608133	YP_009177720.1	447392	447989	-	0	LTR		rnd-5_family-200	5156	449844	450843	-	0	LTR		rnd-5_family-200	5156
Canu_ChuLike39	scaffold_14	NW_021837489.1	1717189	1717704	+	515	Chuviridae-like	Chuvirus Mos8Chu0	1.37e-65	59.064	99	287	457	503	1925502	API61889.1	hypothetical protein	Hubei odonate virus 11	5.74e-23	30	87	275	424	450	1922992	YP_009336948.1																	Cluster347	1670020	1759967	89947	1969	1479
Canu_Flavi12	scaffold_14	NW_021837489.1	1739514	1741339	+	1825	Flaviviridae	Kamiti River virus	1.08e-168	74.729	99	223	499	3357	218849	AAO24117.1	flavivirus polyprotein	Kamiti River virus	7.39e-169	74.729	99	223	499	3357	218849	NP_891560.1	1738607	1738915	+	6.95e-137	Unknown		rnd-1_family-692	311									Cluster347	1670020	1759967	89947	1969	1479
Canu_Rhabdo16	scaffold_14	NW_021837489.1	2321341	2321808	-	467	Rhabdoviridae	Adelaide River virus	5.26e-11	28.916	99	71	234	429	31612	YP_009177239.1	nucleocapsid protein	Adelaide River virus	3.4e-11	28.916	99	71	234	429	31612	YP_009177239.1	2320700	2320775	+	5.37e-18	Unknown		rnd-3_family-992	927									Cluster349	2315819	2364855	49036	15950	13840
Canu_Rhabdo17	scaffold_14	NW_021837489.1	2323826	2324182	-	356	Rhabdoviridae	Grenada mosquito rhabdovirus 1	7.03e-26	42.105	96	305	418	515	2125980	QBQ64911.1	ORF1	Wuhan Mosquito Virus 9	1.81e-20	38.136	99	45	162	279	1608134	YP_009305108.1									2324738	2325061	+	2.13e-143	Unknown		rnd-1_family-729	346	Cluster349	2315819	2364855	49036	15950	13840
Canu_Rhabdo18	scaffold_14	NW_021837489.1	2325252	2326960	-	1708	Rhabdoviridae	Guadeloupe Culex rhabdovirus	6e-43	40.52	90	274	423	515	2125980	QEM39081.1	ORF1	Wuhan Mosquito Virus 9	1e-26	37.5	90	13	163	279	1608134	YP_009305108.1	2324738	2325061	+	2.13e-143	Unknown		rnd-1_family-729	346									Cluster349	2315819	2364855	49036	15950	13840
Canu_Flavi13	scaffold_14	NW_021837489.1	2332584	2333045	-	461	Flaviviridae	La Tina virus	6.49e-39	51.613	99	9	162	3349	2045187	ATL63282.1	flavivirus polyprotein	Kamiti River virus	2.19e-37	49.701	99	1	167	3357	218849	NP_891560.1	2331845	2331913	+	4.71e-25	Unknown		rnd-6_family-864	3757	2333670	2333736	-	1.54e-18	Unknown		rnd-1_family-880	595	Cluster349	2315819	2364855	49036	15950	13840
Canu_Rhabdo19	scaffold_14	NW_021837489.1	2336357	2336776	-	419	Rhabdoviridae	Grenada mosquito rhabdovirus 1	5.73e-23	38.971	95	311	443	515	2125980	AVP26973.1	ORF1	Wuhan Mosquito Virus 9	1.92e-17	35.252	99	45	183	279	1608134	YP_009305108.1																	Cluster349	2315819	2364855	49036	15950	13840
Canu_Un145	scaffold_14	NW_021837489.1	2349699	2349896	-	197	Unclassified	Culex mononega-like virus 2	7.73e-10	46.032	81	339	401	638	2010272	YP_009388620.1	glycoprotein	Culex mononega-like virus 2	5e-10	46.032	81	339	401	638	2010272	YP_009388620.1																	Cluster349	2315819	2364855	49036	15950	13840
Canu_Virga2	scaffold_14	NW_021837489.1	2361427	2361883	-	456	Virgaviridae	Bombus-associated virus Vir1	4.54e-19	42.105	74	197	306	330	2511064	QAY29261.1	RdRp	Xingshan nematode virus 2	1.97e-14	38.519	83	2565	2692	2722	1923761	YP_009345038.1	2360799	2360837	+	2.14e-10	RC	Helitron	rnd-6_family-602	818	2362364	2362399	+	9.1e-09	RC	Helitron	rnd-6_family-602	818	Cluster349	2315819	2364855	49036	15950	13840
Canu_Rhabdo20	scaffold_14	NW_021837489.1	3864682	3865272	-	590	Rhabdoviridae	Grenada mosquito rhabdovirus 1	7.74e-36	39.56	93	274	455	515	2125980	QBQ64911.1	ORF1	Wuhan Mosquito Virus 9	9.09e-28	34.659	88	9	184	279	1608134	YP_009305108.1	3864092	3864611	+	4.68e-177	LTR	Gypsy	rnd-1_family-713	517	3866036	3866222	+	6.98e-61	DNA	Zator	rnd-1_family-226	169	Cluster352	3854314	3871996	17682	451	411
Canu_Un34	scaffold_14	NW_021837489.1	7124106	7124651	+	545	Unclassified	Hubei virga-like virus 2	2.28e-22	36.994	86	27	197	205	1923335	YP_009337413.1	putative coat protein	Hubei virga-like virus 2	1.48e-22	36.994	86	27	197	205	1923335	YP_009337413.1	7123107	7123273	-	6.97e-80	Unknown		rnd-1_family-843	824	7125064	7125512	-	0	DNA	TcMar-Tigger	rnd-1_family-571	475
Canu_ChuLike40	scaffold_14	NW_021837489.1	15616183	15616852	+	669	Chuviridae-like	Chuvirus Mos8Chu0	1.14e-26	39.535	99	53	91	665	1925502	API61888.1	putative glycoprotein	Hubei chuvirus-like virus 3	2.93e-13	32.353	76	99	234	688	1922858	YP_009337090.1									15616940	15617544	+	1.64e-43	LTR		rnd-5_family-200	5156
Canu_Un35	scaffold_14	NW_021837489.1	15616920	15618135	+	1215	Unclassified	Kaiowa virus	2.58e-120	74.286	84	273	342	399	1795439	ASV45863.1	putative glycoprotein	Imjin River virus 1	1.5e-33	35.714	59	248	358	653	1758883	YP_009182178.1
Canu_ChuLike41	scaffold_14	NW_021837489.1	33310899	33311833	-	934	Chuviridae-like	Guato virus	2.09e-132	73.333	77	16	255	289	1795437	ANW72248.1	glycoprotein	Wuhan Mosquito Virus 8	3.49e-41	38.71	91	316	377	653	1608133	YP_009177720.1	33310301	33310899	-	0	LTR		rnd-5_family-200	5156	33311860	33312833	-	0	DNA	CMC-Chapaev	rnd-1_family-505	1464
Canu_ChuLike42	scaffold_14	NW_021837489.1	33313245	33314273	-	1028	Chuviridae-like	Chuvirus Mos8Chu0	1.14e-68	39.697	95	5	329	665	1925502	API61888.1	glycoprotein	Wuhan Mosquito Virus 8	2.31e-43	30.606	96	1	325	653	1608133	YP_009177720.1	33312246	33313245	-	0	DNA	CMC-Chapaev	rnd-1_family-505	1464	33314274	33315273	-	0	LTR		rnd-5_family-200	5156
Canu_ChuLike43	scaffold_14	NW_021837489.1	34127090	34128118	+	1028	Chuviridae-like	Chuvirus Mos8Chu0	1.2e-68	39.697	95	5	329	665	1925502	API61888.1	glycoprotein	Wuhan Mosquito Virus 8	2.24e-43	30.606	96	1	325	653	1608133	YP_009177720.1	34126091	34127090	+	0	LTR		rnd-5_family-200	5156	34128119	34129118	+	0	DNA	CMC-Chapaev	rnd-1_family-505	1464
Canu_Un36	scaffold_14	NW_021837489.1	34129531	34130466	+	935	Unclassified	Kaiowa virus	3.98e-155	69.31	93	56	345	399	1795439	ASV45863.1	glycoprotein	Wuhan Mosquito Virus 8	3.75e-53	32.394	91	316	599	653	1608133	YP_009177720.1	34128532	34129504	+	0	DNA	CMC-Chapaev	rnd-1_family-505	1464	34130467	34131064	+	0	LTR		rnd-5_family-200	5156
Canu_Un37	scaffold_14	NW_021837489.1	42682761	42684410	+	1649	Unclassified	Hubei toti-like virus 10	1.08e-102	46.707	99	506	672	989	1923298	YP_009336493.1	hypothetical protein 2	Hubei toti-like virus 10	7.39e-103	46.707	99	506	672	989	1923298	YP_009336493.1	42682145	42682483	-	1.18e-127	SINE?		rnd-6_family-50	1718	42684885	42685181	-	3.85e-102	DNA	Zator	rnd-1_family-515	297	Cluster375	42680492	42699957	19465	289	230
Canu_Un38	scaffold_14	NW_021837489.1	45102940	45103119	-	179	Unclassified	uncultured virus	1.02e-16	58.929	94	1432	1487	1897	340016	AGW51771.1	RdRp	Aedes camptorhynchus toti-like virus 1	9.38e-15	55.357	94	490	545	955	2010266	YP_009388611.1	45102505	45102940	+	6.5e-169	Unknown		rnd-1_family-579	444	45103745	45104119	-	1.1e-83	LTR	Gypsy	rnd-1_family-636	538
Canu_Un39	scaffold_14	NW_021837489.1	45103142	45103360	-	218	Unclassified	Hubei toti-like virus 10	8.73e-22	50.515	99	393	489	989	1923298	YP_009336493.1	hypothetical protein 2	Hubei toti-like virus 10	5.65e-22	50.515	99	393	489	989	1923298	YP_009336493.1	45102505	45102948	+	2.95e-173	Unknown		rnd-1_family-579	444	45103745	45104267	-	1.03e-134	LTR	Gypsy	rnd-1_family-636	538
Canu_Un146	scaffold_14	NW_021837489.1	45106138	45106350	-	212	Unclassified	dsRNA virus environmental sample	1.56e-15	63.333	85	301	360	934	1075826	AJT39589.1	hypothetical protein 2	Hubei toti-like virus 10	9.73e-12	50	99	256	325	989	1923298	YP_009336493.1	45105711	45105863	+	1.44e-50	DNA	Zator	rnd-1_family-223	170	45106426	45107020	-	0	LTR	Gypsy	rnd-1_family-367	994
Canu_ChuLike44	scaffold_15	NW_021837600.1	31219266	31221159	+	1893	Chuviridae-like	Chuvirus Mos8Chu0	1.81e-143	43.066	97	477	613	665	1925502	API61888.1	glycoprotein	Wuhan Mosquito Virus 8	4.04e-90	32.427	95	1	473	653	1608133	YP_009177720.1	31218267	31219266	+	0	LTR		rnd-5_family-200	5156	31221160	31221778	+	0	LTR		rnd-5_family-200	5156
Canu_ChuLike45	scaffold_15	NW_021837600.1	32246570	32248285	-	1715	Chuviridae-like	Chuvirus Mos8Chu0	7.15e-155	40.214	98	3	563	665	1925502	API61888.1	glycoprotein	Wuhan Mosquito Virus 8	1.06e-91	30.125	98	1	556	653	1608133	YP_009177720.1	32245760	32246041	+	2.43e-136	DNA	MULE-MuDR	rnd-1_family-154	282	32248589	32249283	-	1.03e-77	LTR		rnd-5_family-200	5156
Canu_ChuLike46	scaffold_15	NW_021837600.1	32824051	32824359	+	308	Chuviridae-like	Hubei chuvirus-like virus 3	6.18e-11	40.426	92	28	113	688	1922858	YP_009337090.1	putative glycoprotein	Hubei chuvirus-like virus 3	4e-11	40.426	92	28	113	688	1922858	YP_009337090.1									32824386	32825341	+	7.95e-73	LTR		rnd-5_family-200	5156
Canu_Un40	scaffold_15	NW_021837600.1	32824398	32825984	+	1586	Unclassified	Kaiowa virus	0	100	51	1	270	270	1795439	ANW72242.1	putative glycoprotein	Hubei chuvirus-like virus 3	1.35e-83	30.787	84	173	616	688	1922858	YP_009337090.1									32826849	32826984	+	2.28e-54	LINE	LOA	rnd-6_family-1491	4499
Canu_ChuLike47	scaffold_15	NW_021837600.1	33670590	33672503	+	1913	Chuviridae-like	Chuvirus Mos8Chu0	3.17e-180	40.575	97	5	625	665	1925502	API61888.1	glycoprotein	Wuhan Mosquito Virus 8	2.14e-111	31.457	94	1	599	653	1608133	YP_009177720.1	33669591	33670590	+	0	LTR		rnd-5_family-200	5156	33672504	33673100	+	0	LTR		rnd-5_family-200	5156
Canu_Un41	scaffold_15	NW_021837600.1	42588013	42589022	-	1009	Unclassified	Kaiowa virus	5e-50	48.81	94	1	322	399	1795439	ASV45863.1	glycoprotein	Culex mononega-like virus 2	7e-13	42.65	20	373	440	638	2010272	YP_009388620.1									42589123	42589279	-	2.97e-59	Unknown		rnd-1_family-1466	156
Canu_ChuLike48	scaffold_15	NW_021837600.1	49385039	49387022	+	1983	Chuviridae-like	Guato virus	2.84e-151	96.732	43	132	284	289	1795437	ANW72248.1	putative glycoprotein	Hubei chuvirus-like virus 3	2.89e-87	34.444	89	524	613	688	1922858	YP_009337090.1	49384053	49384400	-	9.06e-85	Unknown		rnd-1_family-451	921	49387198	49388022	+	0	DNA		rnd-5_family-202	1577
Canu_Rhabdo21	scaffold_150	NW_021837601.1	1361180	1363780	-	2600	Rhabdoviridae	Merida-like virus KE-2017a	0	50.415	96	19	860	2136	1969830	YP_009551692.1	large protein	Culex tritaeniorhynchus rhabdovirus	0	49.11	96	24	863	2123	936308	YP_009094323.1	1360191	1360762	+	0	LTR	Gypsy	rnd-5_family-3220	548	1364283	1364665	-	9.66e-129	LTR	Gypsy	rnd-1_family-630	613	Cluster411	1360140	1369401	9261	390	9.86
Canu_Un42	scaffold_16	NW_021837711.1	18647701	18648907	+	1206	Unclassified	Wuhan pillworm virus 2	1.17e-30	40	76	253	327	416	1923745	YP_009345047.1	putative nucleoprotein	Wuhan pillworm virus 2	8.01e-31	40	76	253	327	416	1923745	YP_009345047.1	18647076	18647300	+	6.11e-68	DNA	PIF-Harbinger	rnd-1_family-369	576	18649199	18649907	+	0	LTR	Gypsy	rnd-1_family-378	861
Canu_Un43	scaffold_16	NW_021837711.1	27733707	27735223	+	1516	Unclassified	Kaiowa virus	1.03e-95	74.176	69	168	349	399	1795439	ASV45863.1	hypothetical protein	Dendrolimus punctatus cypovirus 22	6.03e-60	33.457	85	181	449	662	1577776	YP_009111331.1	27732818	27733500	-	0	DNA	CMC-Chapaev-3	rnd-6_family-2049	684	27735390	27735794	-	4.68e-158	Unknown		rnd-5_family-2359	755
Canu_Un44	scaffold_16	NW_021837711.1	28222148	28223995	+	1847	Unclassified	Kaiowa virus	0	98.571	57	1	350	399	1795439	ASV45863.1	putative glycoprotein	Hubei chuvirus-like virus 3	5.13e-105	31.24	98	13	616	688	1922858	YP_009337090.1	28221229	28221631	+	1.1e-178	Unknown		rnd-1_family-249	403
Canu_Un45	scaffold_16	NW_021837711.1	45451916	45452203	+	287	Unclassified	Kaiowa virus	9.24e-38	64.444	94	256	345	399	1795439	ASV45863.1	putative glycoprotein	Hubei chuvirus-like virus 3	4.07e-14	33.708	93	534	622	688	1922858	YP_009337090.1	45450917	45451913	+	0	LTR		rnd-5_family-200	5156	45452204	45452819	+	0	LTR		rnd-5_family-200	5156
Canu_Rhabdo22	scaffold_161	NW_021837723.1	57041	58286	+	1245	Rhabdoviridae	Merida virus	2.19e-33	29.07	86	26	196	508	1803034	YP_009552114.1	glycoprotein	Grass carp virus	6.25e-29	29.379	82	24	197	508	1288359	YP_009094266.1	56647	56826	-	2.78e-72	Unknown		rnd-1_family-1650	180									Cluster461	45277	64989	19712	365	346
Canu_Rhabdo23	scaffold_161	NW_021837723.1	58752	62086	+	3334	Rhabdoviridae	Culex rhabdovirus	0	57.143	97	469	551	2136	2304515	AXQ04764.1	polymerase	Carajas virus	0	54.766	92	531	1063	2109	239239	YP_009505531.1									62715	63086	+	0	LTR	Gypsy	rnd-5_family-3220	548	Cluster461	45277	64989	19712	365	346
Canu_ChuLike49	scaffold_161	NW_021837723.1	569552	571465	-	1913	Chuviridae-like	Chuvirus Mos8Chu0	0	40.735	97	5	625	665	1925502	API61888.1	glycoprotein	Wuhan Mosquito Virus 8	2.31e-111	31.457	94	1	599	653	1608133	YP_009177720.1	568955	569552	-	0	LTR		rnd-5_family-200	5156	571764	572465	-	0	LTR		rnd-5_family-200	5156
Canu_ChuLike50	scaffold_165	NW_021837767.1	68462	70363	-	1901	Chuviridae-like	Chuvirus Mos8Chu0	1.91e-175	41.351	96	3	608	665	1925502	API61888.1	putative glycoprotein	Hubei chuvirus-like virus 3	1.12e-101	30.478	95	15	613	688	1922858	YP_009337090.1	67463	68206	-	0	DNA		rnd-5_family-202	1577	70668	71362	-	1.03e-77	LTR		rnd-5_family-200	5156
Canu_ChuLike51	scaffold_17	NW_021837822.1	17931765	17933678	-	1913	Chuviridae-like	Chuvirus Mos8Chu0	0	40.735	97	5	625	665	1925502	API61888.1	glycoprotein	Wuhan Mosquito Virus 8	2.31e-111	31.457	94	1	599	653	1608133	YP_009177720.1	17931170	17931765	-	0	LTR		rnd-5_family-200	5156	17933679	17934678	-	0	LTR		rnd-5_family-200	5156
Canu_ChuLike52	scaffold_17	NW_021837822.1	37617384	37619297	-	1913	Chuviridae-like	Chuvirus Mos8Chu0	0	40.735	97	5	625	665	1925502	API61888.1	glycoprotein	Wuhan Mosquito Virus 8	2.31e-111	31.457	94	1	599	653	1608133	YP_009177720.1	37616788	37617384	-	0	LTR		rnd-5_family-200	5156	37619298	37620094	-	0	LTR		rnd-5_family-200	5156
Canu_Rhabdo24	scaffold_175	NW_021837878.1	438717	439796	-	1079	Rhabdoviridae	Bivens Arm virus	3.31e-33	31.21	84	23	320	428	909207	AJG05818.1	nucleoprotein N	Tibrogargan virus	3.43e-33	30.476	84	23	320	428	318844	YP_007641368.1	437727	437961	+	7.95e-73	LINE	LOA	rnd-3_family-293	4515	440428	440796	-	4.38e-171	LTR	Gypsy	rnd-5_family-3115	1174
Canu_Rhabdo25	scaffold_175	NW_021837878.1	447836	448657	-	821	Rhabdoviridae	Ekpoma virus	2.87e-13	28.761	80	23	240	427	1615798	AWK27018.1	nucleoprotein	Mount Elgon bat virus	4.57e-13	26.667	82	31	254	427	380434	YP_009362239.1	446837	447388	+	2.59e-180	DNA	CMC-Chapaev	rnd-1_family-236	723	448959	449064	-	1.11e-07	Unknown		rnd-1_family-1301	592
Canu_Rhabdo26	scaffold_175	NW_021837878.1	921772	922950	+	1178	Rhabdoviridae	Ekpoma virus 1	2.7e-23	27.41	84	19	341	429	1987020	YP_009505504.1	N protein	Ekpoma virus 1	1.75e-23	27.41	84	19	341	429	1987020	YP_009505504.1	921357	921462	+	1.11e-07	Unknown		rnd-1_family-1301	592	923591	923935	-	1.1e-83	DNA	CMC-Chapaev	rnd-1_family-236	723
Canu_Rhabdo27	scaffold_175	NW_021837878.1	931221	932390	+	1169	Rhabdoviridae	Bivens Arm virus	2.58e-33	28.087	93	23	424	428	909207	AJG05818.1	nucleoprotein N	Tibrogargan virus	5.07e-33	27.551	93	23	402	428	318844	YP_007641368.1	930890	931117	+	1.1e-83	Unknown		rnd-6_family-464	580	932783	933355	+	4.69e-120	LINE	R1	rnd-5_family-118	5469
Canu_Rhabdo28	scaffold_175	NW_021837878.1	937169	938287	+	1118	Rhabdoviridae	Bivens Arm virus	2.69e-29	30.255	81	23	320	428	909207	AJG05818.1	nucleoprotein N	Tibrogargan virus	2.55e-29	29.582	81	23	320	428	318844	YP_007641368.1	936177	936455	+	3.85e-121	Unknown		rnd-1_family-555	421	939038	939276	-	9.69e-72	LINE	LOA	rnd-3_family-293	4515
Canu_Rhabdo29	scaffold_175	NW_021837878.1	1014105	1015067	-	962	Rhabdoviridae	Coastal Plains virus	8.41e-25	29.114	95	23	320	425	764599	YP_009094404.1	nucleoprotein N	Coastal Plains virus	5.44e-25	29.114	95	23	320	425	764599	YP_009094404.1	1013108	1013232	+	2.78e-34	LINE	LOA	rnd-3_family-293	4515	1015495	1015807	+	6.95e-137	Unknown		rnd-1_family-130	929
Canu_Rhabdo30	scaffold_175	NW_021837878.1	1021650	1022827	-	1177	Rhabdoviridae	Tibrogargan virus	1.66e-21	26.286	75	23	188	428	318844	YP_007641368.1	nucleoprotein N	Tibrogargan virus	1.13e-21	38.889	75	191	315	428	318844	YP_007641368.1	1020651	1020960	+	5.36e-75	DNA	CMC-Chapaev	rnd-1_family-236	723	1022998	1023031	-	4.71e-06	Unknown		rnd-1_family-363	840
Canu_ChuLike53	scaffold_18	NW_021837931.1	5989845	5991758	+	1913	Chuviridae-like	Chuvirus Mos8Chu0	1.5e-180	40.575	97	5	625	665	1925502	API61888.1	glycoprotein	Wuhan Mosquito Virus 8	3.73e-111	31.457	94	1	599	653	1608133	YP_009177720.1	5988846	5989845	+	0	LTR		rnd-5_family-200	5156	5991759	5992356	+	0	LTR		rnd-5_family-200	5156
Canu_Un46	scaffold_18	NW_021837931.1	26856107	26857477	-	1370	Unclassified	Kaiowa virus	0	66.957	76	1	345	399	1795439	ASV45863.1	glycoprotein	Wuhan Mosquito Virus 8	3.19e-81	32.093	94	174	599	653	1608133	YP_009177720.1	26855512	26856107	-	0	LTR		rnd-5_family-200	5156	26857478	26858477	-	0	LTR		rnd-5_family-200	5156
Canu_ChuLike54	scaffold_18	NW_021837931.1	26857542	26857961	-	419	Chuviridae-like	Chuvirus Mos8Chu0	1.72e-15	36.879	97	5	141	665	1925502	API61888.1	glycoprotein	Wuhan Mosquito Virus 8	5.73e-13	32.824	94	5	134	653	1608133	YP_009177720.1	26856543	26857542	-	0	LTR		rnd-5_family-200	5156	26857962	26858961	-	0	LTR		rnd-5_family-200	5156
Canu_Un47	scaffold_182	NW_021837954.1	620129	622045	-	1916	Unclassified	Kaiowa virus	0	70.52	54	1	346	399	1795439	ASV45863.1	glycoprotein	Wuhan Mosquito Virus 8	7.92e-109	31.29	97	5	619	653	1608133	YP_009177720.1
Canu_Un147	scaffold_182	NW_021837954.1	1146591	1148210	-	1619	Unclassified	dsRNA virus environmental sample	0	63.061	91	206	695	934	1075826	AJT39589.1	hypothetical protein 2	Hubei toti-like virus 10	0	57.7	90	164	650	989	1923298	YP_009336493.1	1145964	1146429	+	9.07e-66	LTR	Gypsy	rnd-1_family-651	592	1148318	1149209	-	6.09e-144	Simple_repeat		rnd-1_family-4	1194
Canu_ChuLike55	scaffold_186	NW_021837998.1	301386	303325	+	1939	Chuviridae-like	Chuvirus Mos8Chu0	0	69.52	96	23	650	665	1925502	API61888.1	glycoprotein	Wuhan Mosquito Virus 8	2e-67	37.35	92	17	645	653	1608133	YP_009177720.1	301121	301228	+	1.26e-19	LTR	Gypsy	rnd-5_family-164	5702									Cluster513	285265	339908	54643	2120	153
Canu_ChuLike56	scaffold_186	NW_021837998.1	327309	328589	+	1280	Chuviridae-like	Beihai partiti-like virus 2	6.88e-19	22.775	86	64	437	474	1922504	YP_009333351.1	hypothetical protein	Beihai partiti-like virus 2	4.45e-19	22.775	86	64	437	474	1922504	YP_009333351.1	327205	327265	-	9.71e-15	LTR	Gypsy	rnd-1_family-1398	154									Cluster513	285265	339908	54643	2120	153
Canu_Flavi14	scaffold_186	NW_021837998.1	333610	333834	+	224	Flaviviridae	Aedes flavivirus	5.82e-30	65.854	98	193	274	431	390845	BAH83676.1	envelope protein E	Aedes flavivirus	6.26e-30	65.854	98	220	301	459	390845	YP_009259323.1									333855	334199	-	2.77e-148	Unknown		rnd-1_family-729	346	Cluster513	285265	339908	54643	2120	153
Canu_Flavi15	scaffold_186	NW_021837998.1	335720	336303	+	583	Flaviviridae	Aedes flavivirus	1.93e-79	76.667	77	81	230	390	390845	YP_009259324.1	nonstructural protein NS1	Aedes flavivirus	1.25e-79	76.667	77	81	230	390	390845	YP_009259324.1	334723	335116	-	2.78e-34	LINE	I	rnd-5_family-2929	2690									Cluster513	285265	339908	54643	2120	153
Canu_ChuLike57	scaffold_186	NW_021837998.1	383554	384123	+	569	Chuviridae-like	Chuvirus Mos8Chu0	2.39e-87	64.516	98	448	633	665	1925502	API61888.1	putative glycoprotein	Hubei chuvirus-like virus 3	1.27e-20	27.228	99	453	654	688	1922858	YP_009337090.1	382630	382712	+	5.37e-18	DNA		rnd-5_family-202	1577									Cluster514	370008	479919	109911	3170	660.5
Canu_Flavi16	scaffold_186	NW_021837998.1	413594	414864	+	1270	Flaviviridae	Aedes flavivirus	1.3e-160	46.369	96	467	645	3341	390845	AGJ91136.1	flavivirus polyprotein	Aedes flavivirus	3.52e-157	75.524	96	650	935	3341	390845	YP_003029843.1																	Cluster514	370008	479919	109911	3170	660.5
Canu_ChuLike58	scaffold_186	NW_021837998.1	420086	420835	+	749	Chuviridae-like	Beihai partiti-like virus 2	5.56e-07	21.673	99	176	434	474	1922504	YP_009333351.1	hypothetical protein	Beihai partiti-like virus 2	3.6e-07	21.673	99	176	434	474	1922504	YP_009333351.1																	Cluster514	370008	479919	109911	3170	660.5
Canu_ChuLike59	scaffold_186	NW_021837998.1	440865	442136	+	1271	Chuviridae-like	Beihai partiti-like virus 2	7.01e-24	23.15	95	64	472	474	1922504	YP_009333351.1	hypothetical protein	Beihai partiti-like virus 2	4.53e-24	23.15	95	64	472	474	1922504	YP_009333351.1	439918	440563	+	6.53e-74	LTR	Gypsy	rnd-5_family-164	5702									Cluster514	370008	479919	109911	3170	660.5
Canu_Un48	scaffold_186	NW_021837998.1	449124	449735	+	611	Unclassified	Hubei partiti-like virus 11	6.9e-10	27.103	99	83	288	475	1923017	YP_009329874.1	hypothetical protein	Hubei partiti-like virus 11	4.46e-10	27.103	99	83	288	475	1923017	YP_009329874.1																	Cluster514	370008	479919	109911	3170	660.5
Canu_Phasma1	scaffold_186	NW_021837998.1	453081	453524	+	443	Phasmaviridae	Wuhan Mosquito Virus 2	4.34e-23	43.75	76	29	140	389	1608127	YP_009305134.1	nucleopasid protein	Wuhan Mosquito Virus 2	2.81e-23	43.75	76	29	140	389	1608127	YP_009305134.1									453565	453669	+	3.17e-27	LTR	Pao	rnd-5_family-2132	3231	Cluster514	370008	479919	109911	3170	660.5
Canu_Phasma2	scaffold_186	NW_021837998.1	453712	453951	+	239	Phasmaviridae	Culex phasma-like virus	4e-14	59.322	74	279	337	396	2010276	ASA47280.1	nucleopasid protein	Wuhan Mosquito Virus 2	8.94e-13	52.055	92	279	349	389	1608127	YP_009305134.1	453565	453669	+	3.17e-27	LTR	Pao	rnd-5_family-2132	3231									Cluster514	370008	479919	109911	3170	660.5
Canu_Rhabdo31	scaffold_186	NW_021837998.1	464019	464267	+	248	Rhabdoviridae	Grenada mosquito rhabdovirus 1	3.76e-17	45.882	99	312	393	515	2125980	QBQ64911.1	ORF1	Wuhan Mosquito Virus 9	1.24e-15	43.21	98	53	133	279	1608134	YP_009305108.1	463543	463628	+	6.12e-30	Unknown		rnd-1_family-954	115									Cluster514	370008	479919	109911	3170	660.5
Canu_Rhabdo32	scaffold_186	NW_021837998.1	474723	475130	+	407	Rhabdoviridae	Grenada mosquito rhabdovirus 1	2.25e-29	42.857	98	274	406	515	2125980	QBQ64911.1	ORF1	Wuhan Mosquito Virus 9	3.74e-27	40.146	99	10	146	279	1608134	YP_009305108.1																	Cluster514	370008	479919	109911	3170	660.5
Canu_Rhabdo33	scaffold_187	NW_021838009.1	838599	839369	+	770	Rhabdoviridae	Mopeia rhabdovirus	6.98e-18	39.716	55	765	862	862	1890685	AOR81461.1	large protein	Culex tritaeniorhynchus rhabdovirus	3.66e-10	25.097	99	1829	2043	2123	936308	YP_009094323.1	837709	838295	-	0	LINE	I	rnd-1_family-747	570	839467	839985	-	0	LTR	Gypsy	rnd-1_family-713	517
Canu_Un49	scaffold_19	NW_021838042.1	7770340	7771104	-	764	Unclassified	Hubei virga-like virus 12	5.73e-18	37.037	61	375	428	599	1923327	YP_009337819.1	hypothetical protein	Hubei virga-like virus 12	3.99e-18	37.037	61	375	428	599	1923327	YP_009337819.1	7769341	7769475	+	8.5e-60	DNA	MULE-MuDR	rnd-1_family-154	282	7771409	7772097	+	0	DNA	Zator	rnd-1_family-185	898
Canu_Un50	scaffold_19	NW_021838042.1	7772243	7773033	-	790	Unclassified	Blackford virus	1.74e-43	37.295	92	500	741	996	1807801	AMO03220.1	hypothetical protein	Xingshan nematode virus 1	2.12e-24	31.405	90	2211	2447	2707	1923760	YP_009333310.1	7771409	7772201	+	0	DNA	Zator	rnd-1_family-185	898	7773822	7774028	+	1.18e-89	Unknown		rnd-1_family-1714	394
Canu_ChuLike60	scaffold_19	NW_021838042.1	13031119	13033032	+	1913	Chuviridae-like	Chuvirus Mos8Chu0	0	40.735	97	5	625	665	1925502	API61888.1	glycoprotein	Wuhan Mosquito Virus 8	1.84e-111	31.457	94	1	599	653	1608133	YP_009177720.1	13030120	13031119	+	0	LTR		rnd-5_family-200	5156	13033033	13033629	+	0	LTR		rnd-5_family-200	5156
Canu_Un51	scaffold_193	NW_021838076.1	1121354	1121857	-	503	Unclassified	Hubei virga-like virus 12	4e-46	45.83	99	3	168	170	1923327	YP_009337819.1	hypothetical protein	Hubei virga-like virus 12	8e-47	45.83	99	3	168	170	1923327	YP_009337823.1	1120871	1121127	+	1.03e-115	Satellite		rnd-1_family-1325	428
Canu_Un52	scaffold_193	NW_021838076.1	1121858	1123289	-	1431	Unclassified	Blackford virus	7e-78	41.98	90	669	955	996	1807801	AMO03220.1	hypothetical protein	Xingshan nematore virus 1	5e-52	34.32	83	2376	2667	2707	1923760	YP_009333310.1
Canu_Un53	scaffold_193	NW_021838076.1	1151501	1152922	+	1421	Unclassified	Blackford virus	4.54e-99	47.115	98	872	975	996	1807801	AMO03220.1	hypothetical protein	Xingshan nematode virus 1	4.23e-62	42.157	94	2583	2684	2707	1923760	YP_009333310.1									1153667	1153922	-	1.87e-112	Satellite		rnd-1_family-1325	428
Canu_Un54	scaffold_193	NW_021838076.1	1152984	1153436	+	452	Unclassified	Hubei virga-like virus 12	8.7e-42	48.649	97	23	170	170	1923327	YP_009337823.1	hypothetical protein	Hubei virga-like virus 12	5.63e-42	48.649	97	23	170	170	1923327	YP_009337823.1									1153667	1153923	-	5.35e-113	Satellite		rnd-1_family-1325	428
Canu_ChuLike61	scaffold_2	NW_021838153.1	46367091	46368005	+	914	Chuviridae-like	Chuvirus Mos8Chu0	1.18e-56	39.338	89	7	276	665	1925502	API61888.1	putative glycoprotein	Hubei chuvirus-like virus 3	2.25e-33	29.592	96	10	285	688	1922858	YP_009337090.1									46368006	46368177	+	3.61e-77	DNA	CMC-Chapaev	rnd-1_family-420	239	Cluster575	46365323	46379084	13761	283	232
Canu_Un55	scaffold_2	NW_021838153.1	46368110	46369217	+	1107	Unclassified	Kaiowa virus	1.98e-143	70.312	92	160	351	399	1795439	ASV45863.1	glycoprotein	Wuhan Mosquito Virus 8	8.37e-54	40.26	95	268	420	653	1608133	YP_009177720.1	46367944	46368110	+	1.87e-74	DNA	CMC-Chapaev	rnd-1_family-420	239	46369863	46370200	+	1.63e-157	Unknown		rnd-1_family-810	348	Cluster575	46365323	46379084	13761	283	232
Canu_ChuLike62	scaffold_2	NW_021838153.1	66145677	66147590	-	1913	Chuviridae-like	Chuvirus Mos8Chu0	0	40.605	97	3	625	665	1925502	API61888.1	glycoprotein	Wuhan Mosquito Virus 8	2.05e-111	31.457	94	1	599	653	1608133	YP_009177720.1	66145080	66145677	-	0	LTR		rnd-5_family-200	5156	66147591	66148590	-	0	LTR		rnd-5_family-200	5156
Canu_ChuLike63	scaffold_2	NW_021838153.1	80214089	80216071	-	1982	Chuviridae-like	Guato virus	0	100	41	3	275	281	1795437	ANW72245.1	putative glycoprotein	Hubei chuvirus-like virus 3	2.57e-105	30.807	91	15	613	688	1922858	YP_009337090.1	80213090	80213913	-	0	DNA		rnd-5_family-202	1577	80216376	80217070	-	2.43e-79	LTR		rnd-5_family-200	5156
Canu_ChuLike64	scaffold_2	NW_021838153.1	83141007	83142920	+	1913	Chuviridae-like	Chuvirus Mos8Chu0	0	40.735	97	5	625	665	1925502	API61888.1	glycoprotein	Wuhan Mosquito Virus 8	1.84e-111	31.457	94	1	599	653	1608133	YP_009177720.1	83140008	83141007	+	0	LTR		rnd-5_family-200	5156	83142921	83143347	+	0	LTR		rnd-5_family-200	5156
Canu_ChuLike65	scaffold_2	NW_021838153.1	84545737	84547650	-	1913	Chuviridae-like	Chuvirus Mos8Chu0	0	40.735	97	5	625	665	1925502	API61888.1	glycoprotein	Wuhan Mosquito Virus 8	2.31e-111	31.457	94	1	599	653	1608133	YP_009177720.1	84545140	84545737	-	0	LTR		rnd-5_family-200	5156	84547651	84548650	-	0	LTR		rnd-5_family-200	5156
Canu_ChuLike66	scaffold_2	NW_021838153.1	109681284	109683197	+	1913	Chuviridae-like	Chuvirus Mos8Chu0	0	40.735	97	5	625	665	1925502	API61888.1	glycoprotein	Wuhan Mosquito Virus 8	1.84e-111	31.457	94	1	599	653	1608133	YP_009177720.1	109680285	109681284	+	0	LTR		rnd-5_family-200	5156	109683198	109683792	+	0	LTR		rnd-5_family-200	5156
Canu_Un56	scaffold_2	NW_021838153.1	124555542	124557547	+	2005	Unclassified	Kaiowa virus	0	98.444	60	1	257	399	1795439	ASV45863.1	putative glycoprotein	Hubei chuvirus-like virus 3	2.08e-86	30.814	97	513	684	688	1922858	YP_009337090.1									124558365	124558446	+	9.7e-34	DNA		rnd-6_family-346	289
Canu_ChuLike67	scaffold_2	NW_021838153.1	155236762	155237382	-	620	Chuviridae-like	Guato virus	2.15e-128	99.487	94	81	275	281	1795437	ANW72245.1	putative glycoprotein	Hubei chuvirus-like virus 3	4.38e-19	27.778	78	456	613	688	1922858	YP_009337090.1	155235763	155236588	-	0	DNA		rnd-5_family-202	1577	155237595	155238369	-	2.96e-97	LTR		rnd-5_family-200	5156
Canu_ChuLike68	scaffold_2	NW_021838153.1	157034697	157036610	-	1913	Chuviridae-like	Chuvirus Mos8Chu0	0	40.735	97	5	625	665	1925502	API61888.1	glycoprotein	Wuhan Mosquito Virus 8	2.31e-111	31.457	94	1	599	653	1608133	YP_009177720.1	157034100	157034697	-	0	LTR		rnd-5_family-200	5156	157036611	157037610	-	0	LTR		rnd-5_family-200	5156
Canu_Un57	scaffold_2	NW_021838153.1	159390308	159392178	+	1870	Unclassified	Kaiowa virus	1.65e-160	70.066	49	42	345	399	1795439	ASV45863.1	glycoprotein	Wuhan Mosquito Virus 8	1.27e-89	33.443	97	295	599	653	1608133	YP_009177720.1	159389309	159390125	+	0	LTR		rnd-5_family-200	5156	159392179	159392775	+	0	LTR		rnd-5_family-200	5156
Canu_ChuLike69	scaffold_2	NW_021838153.1	164388297	164388566	+	269	Chuviridae-like	Guato virus	3.58e-58	98.876	99	47	135	185	1795437	ANW72251.1	putative glycoprotein	Hubei chuvirus-like virus 3	4.3e-15	34.091	98	526	613	688	1922858	YP_009337090.1	164387326	164388100	+	5.72e-100	LTR		rnd-5_family-200	5156	164388877	164389566	+	0	DNA		rnd-5_family-202	1577
Canu_Flavi17	scaffold_2	NW_021838153.1	164421089	164422939	-	1850	Flaviviridae	Aedes flavivirus	0	91.48	92	1552	2133	3341	390845	YP_003029843.1	flavivirus polyprotein	Aedes flavivirus	0	91.48	92	1552	2133	3341	390845	YP_003029843.1									164422940	164423939	+	2.59e-161	LTR	Gypsy	rnd-5_family-1101	3248
Canu_Flavi18	scaffold_2	NW_021838153.1	164434105	164435443	-	1338	Flaviviridae	Aedes flavivirus	0	91.373	92	1715	1969	3341	390845	YP_003029843.1	flavivirus polyprotein	Aedes flavivirus	0	91.373	92	1715	1969	3341	390845	YP_003029843.1									164435444	164436442	+	2.59e-161	LTR	Gypsy	rnd-5_family-1101	3248
Canu_Un148	scaffold_2	NW_021838153.1	164444797	164445570	-	773	Unclassified	Culex mononega-like virus 2	1.39e-81	50	99	24	281	638	2010272	YP_009388620.1	glycoprotein	Culex mononega-like virus 2	8.98e-82	50	99	24	281	638	2010272	YP_009388620.1	164443963	164444272	-	3.85e-121	Unknown		rnd-1_family-408	320									Cluster650	164445013	164574004	128991	1420	143
Canu_Rhabdo34	scaffold_2	NW_021838153.1	164452769	164453017	-	248	Rhabdoviridae	Grenada mosquito rhabdovirus 1	9.09e-18	47.059	99	311	392	515	2125980	AVP26973.1	ORF1	Wuhan Mosquito Virus 9	3.2e-16	43.902	99	51	132	279	1608134	YP_009305108.1									164453668	164454017	-	3.59e-172	Unknown		rnd-1_family-1417	436	Cluster650	164445013	164574004	128991	1420	143
Canu_Phasma3	scaffold_2	NW_021838153.1	164467614	164467832	-	218	Phasmaviridae	Culex phasma-like virus	2.85e-14	59.322	81	279	337	396	2010276	ASA47280.1	nucleopasid protein	Wuhan Mosquito Virus 2	6.45e-13	57.627	81	279	337	389	1608127	YP_009305134.1									164467894	164467935	-	2.61e-09	LTR	Pao	rnd-5_family-2132	3231	Cluster650	164445013	164574004	128991	1420	143
Canu_Phasma4	scaffold_2	NW_021838153.1	164468038	164468361	-	323	Phasmaviridae	Wuhan Mosquito Virus 2	1.71e-22	48.454	90	33	129	389	1608127	YP_009305134.1	nucleopasid protein	Wuhan Mosquito Virus 2	1.11e-22	48.454	90	33	129	389	1608127	YP_009305134.1	164467578	164467647	-	1.18e-13	LTR	Pao	rnd-5_family-2132	3231									Cluster650	164445013	164574004	128991	1420	143
Canu_ChuLike70	scaffold_2	NW_021838153.1	164477662	164478498	-	836	Chuviridae-like	Beihai partiti-like virus 2	5.21e-15	25.112	78	64	282	474	1922504	YP_009333351.1	hypothetical protein	Beihai partiti-like virus 2	3.37e-15	25.112	78	64	282	474	1922504	YP_009333351.1																	Cluster650	164445013	164574004	128991	1420	143
Canu_ChuLike71	scaffold_2	NW_021838153.1	164479492	164480145	-	653	Chuviridae-like	Beihai partiti-like virus 2	9.15e-14	24.324	99	64	280	474	1922504	YP_009333351.1	hypothetical protein	Beihai partiti-like virus 2	5.92e-14	24.324	99	64	280	474	1922504	YP_009333351.1									164480602	164480752	-	2e-61	Unknown		rnd-4_family-1437	151	Cluster650	164445013	164574004	128991	1420	143
Canu_ChuLike72	scaffold_2	NW_021838153.1	164485444	164486322	-	878	Chuviridae-like	Beihai partiti-like virus 2	1.31e-09	21.382	99	171	468	474	1922504	YP_009333351.1	hypothetical protein	Beihai partiti-like virus 2	8.45e-10	21.382	99	171	468	474	1922504	YP_009333351.1	164484936	164485116	-	3.38e-71	Unknown		rnd-1_family-1062	186									Cluster650	164445013	164574004	128991	1420	143
Canu_ChuLike73	scaffold_2	NW_021838153.1	164539558	164540025	-	467	Chuviridae-like	Chuvirus Mos8Chu0	9.46e-42	62.963	69	543	650	665	1925502	API61888.1	putative glycoprotein	Hubei chuvirus-like virus 3	2.5e-11	30.631	71	548	649	688	1922858	YP_009337090.1																	Cluster650	164445013	164574004	128991	1420	143
Canu_ChuLike74	scaffold_2	NW_021838153.1	164542462	164543924	-	1462	Chuviridae-like	Chuvirus Mos8Chu0	0	70.78	93	23	485	665	1925502	API61888.1	glycoprotein	Wuhan Mosquito Virus 8	9e-47	34.55	62	149	478	653	1608133	YP_009177720.1																	Cluster650	164445013	164574004	128991	1420	143
Canu_ChuLike75	scaffold_2	NW_021838153.1	164554453	164555442	-	989	Chuviridae-like	Chuvirus Mos8Chu0	9.94e-152	64.856	95	341	650	665	1925502	API61888.1	putative glycoprotein	Hubei chuvirus-like virus 3	2.36e-44	30.721	96	342	651	688	1922858	YP_009337090.1																	Cluster650	164445013	164574004	128991	1420	143
Canu_Un58	scaffold_2	NW_021838153.1	164555614	164556204	-	590	Unclassified	Hubei diptera virus 17	3.32e-23	35.407	99	1	205	474	1922878	YP_009337871.1	hypothetical protein	Hubei diptera virus 17	2.15e-23	35.407	99	1	205	474	1922878	YP_009337871.1	164554637	164554727	-	9.1e-09	LTR		rnd-5_family-200	5156	164556882	164557204	+	1.03e-153	Unknown		rnd-5_family-3666	1218	Cluster650	164445013	164574004	128991	1420	143
Canu_ChuLike76	scaffold_2	NW_021838153.1	166091142	166091693	+	551	Chuviridae-like	Chuvirus Mos8Chu0	5.7e-29	38.596	93	14	184	665	1925502	API61888.1	putative glycoprotein	Hubei chuvirus-like virus 3	2.92e-18	34.545	89	28	192	688	1922858	YP_009337090.1	166090199	166090845	+	2.44e-41	LTR		rnd-5_family-200	5156	166091818	166091932	+	1.18e-13	LTR		rnd-5_family-200	5156
Canu_Un149	scaffold_2	NW_021838153.1	166091696	166092055	+	359	Unclassified	Cumbaru virus	3.68e-31	55.696	66	74	152	157	2027351	ASV45869.1	putative glycoprotein	Hubei chuvirus-like virus 3	4.45e-15	31.356	99	536	641	688	1922858	YP_009337090.1	166091208	166091487	+	2e-23	LTR		rnd-5_family-200	5156
Canu_ChuLike77	scaffold_2	NW_021838153.1	166736723	166738636	+	1913	Chuviridae-like	Chuvirus Mos8Chu0	0	40.735	97	5	625	665	1925502	API61888.1	glycoprotein	Wuhan Mosquito Virus 8	1.84e-111	31.457	94	1	599	653	1608133	YP_009177720.1	166735724	166736693	+	0	LTR		rnd-5_family-200	5156	166738637	166739233	+	0	LTR		rnd-5_family-200	5156
Canu_ChuLike78	scaffold_20	NW_021838154.1	4598901	4600883	-	1982	Chuviridae-like	Guato virus	0	100	41	3	275	281	1795437	ANW72245.1	putative glycoprotein	Hubei chuvirus-like virus 3	2.57e-105	30.807	91	15	613	688	1922858	YP_009337090.1	4597902	4598725	-	0	DNA		rnd-5_family-202	1577	4601188	4601880	-	5.36e-75	LTR		rnd-5_family-200	5156
Canu_ChuLike79	scaffold_20	NW_021838154.1	10229207	10231189	-	1982	Chuviridae-like	Guato virus	0	100	41	3	275	281	1795437	ANW72245.1	putative glycoprotein	Hubei chuvirus-like virus 3	2.54e-104	30.909	91	15	613	688	1922858	YP_009337090.1	10228208	10229031	-	0	DNA		rnd-5_family-202	1577	10231498	10232189	-	2.78e-72	LTR		rnd-5_family-200	5156
Canu_ChuLike80	scaffold_20	NW_021838154.1	10261034	10263016	-	1982	Chuviridae-like	Guato virus	0	100	41	3	275	281	1795437	ANW72245.1	putative glycoprotein	Hubei chuvirus-like virus 3	2.54e-104	30.909	91	15	613	688	1922858	YP_009337090.1	10260036	10260859	-	0	DNA		rnd-5_family-202	1577	10263325	10264016	-	2.78e-72	LTR		rnd-5_family-200	5156
Canu_Flavi19	scaffold_20	NW_021838154.1	19234975	19241568	+	6593	Flaviviridae	Aedes flavivirus	0	97.63	99	1155	1828	3341	390845	AGJ91136.1	flavivirus polyprotein	Aedes flavivirus	0	97.185	99	1155	1828	3341	390845	YP_003029843.1	19234156	19234975	-	0	LTR	Gypsy	rnd-5_family-834	6520	19241576	19241751	+	2.14e-48	LTR	Gypsy	rnd-5_family-834	6520
Canu_ChuLike81	scaffold_20	NW_021838154.1	20284695	20286614	-	1919	Chuviridae-like	Guato virus	1.26e-178	98.491	41	1	265	289	1795437	ANW72248.1	putative glycoprotein	Hubei chuvirus-like virus 3	3.43e-105	30.807	94	15	613	688	1922858	YP_009337090.1	20283696	20284465	-	0	DNA		rnd-5_family-202	1577	20286928	20287614	-	8.49e-79	LTR		rnd-5_family-200	5156
Canu_Rhabdo35	scaffold_20	NW_021838154.1	23446840	23447361	+	521	Rhabdoviridae	Grenada mosquito rhabdovirus 1	2.49e-31	38.728	98	274	443	515	2125980	QBQ64911.1	ORF1	Wuhan Mosquito Virus 9	4.68e-29	34.857	99	10	184	279	1608134	YP_009305108.1	23445901	23445984	-	1.75e-30	DNA	MULE-MuDR	rnd-1_family-1176	193	23447793	23447899	+	6.98e-42	DNA	MULE-MuDR	rnd-1_family-1176	193
Canu_Un59	scaffold_201	NW_021838166.1	180574	182441	+	1867	Unclassified	Kaiowa virus	9.79e-161	68.81	50	35	345	399	1795439	ASV45863.1	glycoprotein	Wuhan Mosquito Virus 8	3.52e-89	34	97	300	599	653	1608133	YP_009177720.1	179575	180420	+	0	LTR		rnd-5_family-200	5156	182442	183038	+	0	LTR		rnd-5_family-200	5156
Canu_Un60	scaffold_201	NW_021838166.1	504505	506355	-	1850	Unclassified	Kaiowa virus	0	98.571	57	1	350	399	1795439	ASV45863.1	putative glycoprotein	Hubei chuvirus-like virus 3	2.57e-104	31.695	96	28	616	688	1922858	YP_009337090.1
Canu_ChuLike82	scaffold_207	NW_021838200.1	142008	143973	-	1965	Chuviridae-like	Guato virus	0	98.94	43	1	283	289	1795437	ANW72248.1	putative glycoprotein	Hubei chuvirus-like virus 3	9.51e-80	32.558	91	12	179	688	1922858	YP_009337090.1	141009	141832	-	0	DNA		rnd-5_family-202	1577	144278	144972	-	2.78e-72	LTR		rnd-5_family-200	5156
Canu_Un61	scaffold_21	NW_021838233.1	14862171	14864018	-	1847	Unclassified	Kaiowa virus	0	99.63	44	1	270	270	1795439	ANW72242.1	putative glycoprotein	Hubei chuvirus-like virus 3	1.52e-104	31.24	98	13	616	688	1922858	YP_009337090.1
Canu_ChuLike83	scaffold_21	NW_021838233.1	17715179	17716013	+	834	Chuviridae-like	Guato virus	1.57e-140	100	99	68	177	289	1795437	ANW72248.1	hypothetical protein	Dendrolimus punctatus cypovirus 22	5.85e-29	50	91	381	440	662	1577776	YP_009111331.1									17716197	17717013	+	0	DNA		rnd-5_family-202	1577
Canu_Un62	scaffold_22	NW_021838343.1	12466187	12467530	+	1343	Unclassified	Kaiowa virus	2e-137	66.46	76	1	343	399	1795439	ASV45863.1	hypothetical protein	Dendrolimus punctatus cypovirus 22	3e-34	28.5	84	181	621	662	1577776	YP_009111331.1	12465732	12466184	+	6.99e-23	LTR		rnd-5_family-200	5156
Canu_Un63	scaffold_22	NW_021838343.1	20573802	20575649	+	1847	Unclassified	Kaiowa virus	0	98.857	57	1	350	399	1795439	ASV45863.1	putative glycoprotein	Hubei chuvirus-like virus 3	7.69e-109	31.24	98	13	616	688	1922858	YP_009337090.1
Canu_Un64	scaffold_227	NW_021838385.1	493568	495554	+	1986	Unclassified	Kaiowa virus	0	100	41	1	270	270	1795439	ANW72242.1	putative glycoprotein	Hubei chuvirus-like virus 3	2.07e-76	37.037	86	28	54	688	1922858	YP_009337090.1
Canu_Un65	scaffold_227	NW_021838385.1	879982	881607	-	1625	Unclassified	Kaiowa virus	0	100	50	1	270	270	1795439	ANW72242.1	putative glycoprotein	Hubei chuvirus-like virus 3	1.91e-83	30.787	82	173	616	688	1922858	YP_009337090.1	879054	879154	+	6.12e-30	Unknown		rnd-1_family-235	221
Canu_ChuLike84	scaffold_227	NW_021838385.1	881643	881984	-	341	Chuviridae-like	Chuvirus Mos8Chu0	3.6e-14	42.857	85	19	116	665	1925502	API61888.1	putative glycoprotein	Hubei chuvirus-like virus 3	4.57e-11	38.298	83	28	121	688	1922858	YP_009337090.1	880664	881619	-	9.69e-72	LTR		rnd-5_family-200	5156
Canu_Un66	scaffold_229	NW_021838387.1	931300	933146	+	1846	Unclassified	Kaiowa virus	6.44e-129	74.775	56	47	156	399	1795439	ASV45863.1	glycoprotein	Wuhan Mosquito Virus 8	6.54e-78	42.857	98	565	599	653	1608133	YP_009177720.1	930301	931300	+	0	LTR		rnd-5_family-200	5156	933147	933764	+	0	LTR		rnd-5_family-200	5156
Canu_ChuLike85	scaffold_238	NW_021838397.1	424504	426369	+	1865	Chuviridae-like	Chuvirus Mos8Chu0	1.25e-133	45.192	99	522	625	665	1925502	API61888.1	putative glycoprotein	Hubei chuvirus-like virus 3	3.4e-78	35.821	93	30	96	688	1922858	YP_009337090.1	423505	424504	+	0	LTR		rnd-5_family-200	5156	426370	426965	+	0	LTR		rnd-5_family-200	5156
Canu_Un67	scaffold_24	NW_021838399.1	4615313	4617179	+	1866	Unclassified	Kaiowa virus	5e-178	66.957	55	1	345	399	1795439	ASV45863.1	glycoprotein	Wuhan Mosquito Virus 8	1.19e-83	33.426	94	245	599	653	1608133	YP_009177720.1	4614314	4615313	+	0	LTR		rnd-5_family-200	5156	4617180	4617777	+	0	LTR		rnd-5_family-200	5156
Canu_Un68	scaffold_24	NW_021838399.1	4629856	4631723	-	1867	Unclassified	Kaiowa virus	1.09e-177	66.957	55	1	345	399	1795439	ASV45863.1	glycoprotein	Wuhan Mosquito Virus 8	1.69e-88	33.923	95	261	599	653	1608133	YP_009177720.1	4629258	4629856	-	0	LTR		rnd-5_family-200	5156	4631724	4632723	-	0	LTR		rnd-5_family-200	5156
Canu_Un69	scaffold_24	NW_021838399.1	7094062	7096083	+	2021	Unclassified	Kaiowa virus	0	75.645	52	1	349	399	1795439	ASV45863.1	glycoprotein	Wuhan Mosquito Virus 8	4.11e-114	32.242	90	1	607	653	1608133	YP_009177720.1	7093072	7093506	+	4.13e-13	LTR		rnd-5_family-200	5156
Canu_Un70	scaffold_24	NW_021838399.1	7373167	7375014	-	1847	Unclassified	Kaiowa virus	0	100	44	1	270	270	1795439	ANW72242.1	putative glycoprotein	Hubei chuvirus-like virus 3	4.97e-105	31.596	99	4	616	688	1922858	YP_009337090.1
Canu_Un71	scaffold_24	NW_021838399.1	9564427	9565955	+	1528	Unclassified	Kaiowa virus	2.06e-119	67.901	48	1	243	399	1795439	ASV45863.1	glycoprotein	Wuhan Mosquito Virus 8	2.43e-70	34.47	98	245	504	653	1608133	YP_009177720.1	9563428	9564427	+	0	LTR		rnd-5_family-200	5156	9565956	9566203	+	1.34e-120	LTR		rnd-5_family-200	5156
Canu_Un150	scaffold_24	NW_021838399.1	9565970	9566206	+	236	Unclassified	Cumbaru virus	1.06e-31	64.103	99	61	138	157	2027351	ASV45869.1	putative glycoprotein	Hubei chuvirus-like virus 3	6.9e-08	31.081	94	526	599	688	1922858	YP_009337090.1	9564971	9565970	+	0	LTR		rnd-5_family-200	5156	9566713	9566784	+	2.61e-09	LTR	Gypsy	rnd-1_family-1775	323
Canu_ChuLike86	scaffold_240	NW_021838400.1	804038	805984	+	1946	Chuviridae-like	Chuvirus Mos8Chu0	0	40.867	99	5	649	665	1925502	API61888.1	putative glycoprotein	Hubei chuvirus-like virus 3	1.95e-111	29.516	95	28	644	688	1922858	YP_009337090.1	803050	803736	+	1.18e-51	LTR		rnd-5_family-200	5156
Canu_ChuLike87	scaffold_246	NW_021838406.1	288978	289577	+	599	Chuviridae-like	Chuvirus Mos8Chu0	4.73e-29	36.649	95	3	193	665	1925502	API61888.1	putative glycoprotein	Hubei chuvirus-like virus 3	3.79e-16	33.333	95	12	199	688	1922858	YP_009337090.1	287981	288673	+	6.97e-80	LTR		rnd-5_family-200	5156	289588	290576	+	2.27e-130	LTR		rnd-5_family-200	5156
Canu_Un72	scaffold_246	NW_021838406.1	289792	290622	+	830	Unclassified	Kaiowa virus	1.33e-139	66.79	98	1	271	399	1795439	ASV45863.1	glycoprotein	Wuhan Mosquito Virus 8	7.24e-50	31.387	99	259	532	653	1608133	YP_009177720.1	289042	289743	+	1.03e-96	LTR		rnd-5_family-200	5156	291139	291622	+	0	DNA		rnd-5_family-202	1577
Canu_ChuLike88	scaffold_246	NW_021838406.1	290625	290969	+	344	Chuviridae-like	Guato virus	6.82e-72	95.495	97	72	182	185	1795437	ANW72251.1	putative glycoprotein	Hubei chuvirus-like virus 3	1.39e-12	36.735	85	552	642	688	1922858	YP_009337090.1	289634	290592	+	4.39e-133	LTR		rnd-5_family-200	5156	291139	291969	+	0	DNA		rnd-5_family-202	1577
Canu_ChuLike89	scaffold_25	NW_021838410.1	4201250	4203118	-	1868	Chuviridae-like	Chuvirus Mos8Chu0	0	40.735	99	5	625	665	1925502	API61888.1	glycoprotein	Wuhan Mosquito Virus 8	1.29e-111	31.457	97	1	599	653	1608133	YP_009177720.1	4200654	4201250	-	0	LTR		rnd-5_family-200	5156	4203119	4204118	-	0	LTR		rnd-5_family-200	5156
Canu_ChuLike90	scaffold_25	NW_021838410.1	5315473	5317410	-	1937	Chuviridae-like	Guato virus	0	100	42	3	275	281	1795437	ANW72245.1	putative glycoprotein	Hubei chuvirus-like virus 3	1.66e-106	31.457	93	15	613	688	1922858	YP_009337090.1	5314474	5315297	-	0	DNA		rnd-5_family-202	1577	5317411	5317563	+	1.18e-70	Unknown		rnd-1_family-722	164
Canu_ChuLike91	scaffold_25	NW_021838410.1	5935297	5935860	+	563	Chuviridae-like	Chuvirus Mos8Chu0	3.51e-25	36.066	97	5	187	665	1925502	API61888.1	glycoprotein	Wuhan Mosquito Virus 8	3.07e-12	29.57	98	1	184	653	1608133	YP_009177720.1	5934471	5934939	+	1.26e-76	DNA	CMC-Transib	rnd-1_family-800	473	5935861	5936109	-	7.94e-111	Unknown		rnd-1_family-692	311
Canu_ChuLike92	scaffold_25	NW_021838410.1	5936103	5937557	+	1454	Chuviridae-like	Guato virus	0	99.27	57	3	276	281	1795437	ANW72245.1	putative glycoprotein	Hubei chuvirus-like virus 3	4.11e-81	30.752	91	177	613	688	1922858	YP_009337090.1	5935800	5936103	-	9.04e-142	Unknown		rnd-1_family-692	311	5937733	5938557	+	0	DNA		rnd-5_family-202	1577
Canu_ChuLike93	scaffold_25	NW_021838410.1	6537456	6539438	+	1982	Chuviridae-like	Guato virus	0	99.27	41	3	276	281	1795437	ANW72245.1	putative glycoprotein	Hubei chuvirus-like virus 3	6.13e-105	30.643	91	15	613	688	1922858	YP_009337090.1	6536457	6537151	+	2e-80	LTR		rnd-5_family-200	5156	6539614	6540438	+	0	DNA		rnd-5_family-202	1577
Canu_ChuLike94	scaffold_26	NW_021838421.1	1734615	1736528	+	1913	Chuviridae-like	Chuvirus Mos8Chu0	0	40.735	97	5	625	665	1925502	API61888.1	glycoprotein	Wuhan Mosquito Virus 8	1.84e-111	31.457	94	1	599	653	1608133	YP_009177720.1	1733616	1734615	+	0	LTR		rnd-5_family-200	5156	1736529	1737125	+	0	LTR		rnd-5_family-200	5156
Canu_Rhabdo36	scaffold_26	NW_021838421.1	5054204	5055283	-	1079	Rhabdoviridae	Bivens Arm virus	2.57e-31	30.892	84	23	320	428	909207	AJG05818.1	nucleoprotein N	Tibrogargan virus	2.38e-31	30.159	84	23	320	428	318844	YP_007641368.1	5053210	5053448	+	1.18e-70	LINE	LOA	rnd-3_family-293	4515	5055711	5056022	+	3.16e-141	Unknown		rnd-1_family-130	929
Canu_Rhabdo37	scaffold_26	NW_021838421.1	5061846	5063024	-	1178	Rhabdoviridae	Ekpoma virus 1	2.41e-23	27.195	89	2	341	429	1987020	YP_009505504.1	N protein	Ekpoma virus 1	1.56e-23	27.195	89	2	341	429	1987020	YP_009505504.1	5060852	5061188	+	1.64e-81	DNA	CMC-Chapaev	rnd-1_family-236	723	5063328	5063433	-	1.11e-07	Unknown		rnd-1_family-1301	592
Canu_Rhabdo38	scaffold_267	NW_021838429.1	851170	852027	+	857	Rhabdoviridae	Merida virus	8.4e-80	60	74	771	980	2136	1803034	YP_009552115.1	large protein	Culex tritaeniorhynchus rhabdovirus	2.86e-76	57.82	74	767	976	2123	936308	YP_009094323.1									852028	852158	+	6.12e-49	LTR	Gypsy	rnd-1_family-630	613
Canu_Rhabdo39	scaffold_267	NW_021838429.1	852169	854005	-	1836	Rhabdoviridae	Benxi bat virus	1.97e-174	56.265	69	57	479	530	2010263	AQX45764.2	RNA-dependent RNA polymerase	Piry virus	1.08e-161	56.738	79	283	705	2095	11274	YP_009505536.1	851917	852158	+	3.16e-103	LTR	Gypsy	rnd-1_family-630	613	854006	854136	+	6.12e-49	LTR	Gypsy	rnd-1_family-630	613
Canu_Rhabdo40	scaffold_267	NW_021838429.1	854147	855983	-	1836	Rhabdoviridae	Benxi bat virus	4.97e-174	56.265	69	57	479	530	2010263	AQX45764.2	RNA-dependent RNA polymerase	Piry virus	1.71e-161	56.738	79	283	705	2095	11274	YP_009505536.1	853895	854136	+	3.16e-103	LTR	Gypsy	rnd-1_family-630	613	855984	856114	+	6.12e-49	LTR	Gypsy	rnd-1_family-630	613
Canu_Rhabdo41	scaffold_267	NW_021838429.1	856125	857961	-	1836	Rhabdoviridae	Benxi bat virus	1.97e-174	56.265	69	57	479	530	2010263	AQX45764.2	RNA-dependent RNA polymerase	Piry virus	1.08e-161	56.738	79	283	705	2095	11274	YP_009505536.1	855873	856114	+	3.16e-103	LTR	Gypsy	rnd-1_family-630	613	857962	858092	+	6.12e-49	LTR	Gypsy	rnd-1_family-630	613
Canu_Rhabdo42	scaffold_267	NW_021838429.1	858103	860551	-	2448	Rhabdoviridae	Merida-like virus KE-2017a	0	48.077	89	5	731	2136	1969830	YP_009551692.1	large protein	Culex tritaeniorhynchus rhabdovirus	0	47.593	88	4	719	2123	936308	YP_009094323.1	857851	858092	+	3.16e-103	LTR	Gypsy	rnd-1_family-630	613	860567	860948	+	9.02e-180	Unknown		rnd-1_family-725	1135
Canu_ChuLike95	scaffold_271	NW_021838434.1	225549	226556	+	1007	Chuviridae-like	Chuvirus Mos8Chu0	1.2e-58	38.854	91	19	327	665	1925502	API61888.1	putative glycoprotein	Hubei chuvirus-like virus 3	9e-40	31.579	85	30	310	688	1922858	YP_009337090.1	224550	225549	+	0	LTR		rnd-5_family-200	5156	226981	227556	-	0	LINE	RTE-BovB	rnd-6_family-1899	3004
Canu_Un73	scaffold_287	NW_021838451.1	104190	104449	+	259	Unclassified	Tongilchon virus 1	9.3e-07	63.636	99	1024	1056	2122	1758878	YP_009182186.1	putative RNA-dependent RNA polymerase	Tongilchon virus 1	6.06e-07	63.636	99	1024	1056	2122	1758878	YP_009182186.1	103191	103859	+	0	LINE	RTE-BovB	rnd-6_family-544	3079	104744	105434	-	0	LINE	R1	rnd-6_family-237	4809
Canu_Rhabdo43	scaffold_287	NW_021838451.1	104470	104697	+	227	Rhabdoviridae	Riverside virus 1	1.57e-09	48.75	99	1121	1198	2122	1803263	AMJ52368.1	NA	NA	-1	.	.	.	.	.	.	.	103471	103859	+	1.03e-172	LINE	RTE-BovB	rnd-6_family-544	3079	104744	105697	-	0	LINE	R1	rnd-6_family-237	4809
Canu_Rhabdo44	scaffold_287	NW_021838451.1	548795	549406	-	611	Rhabdoviridae	Riverside virus 1	9.31e-24	38.647	99	991	1197	2122	1803263	YP_009552820.1	RdRp	Culex rhabdo-like virus	4.74e-22	38.071	92	1004	1197	2119	2010277	YP_009388616.1	547797	548790	+	0	LINE	R1	rnd-6_family-237	4809	549958	550404	+	2.59e-180	DNA		rnd-6_family-536	902
Canu_ChuLike96	scaffold_3	NW_021838465.1	12174972	12175703	+	731	Chuviridae-like	Guato virus	5.54e-161	98.305	97	41	276	281	1795437	ANW72245.1	hypothetical protein	Dendrolimus punctatus cypovirus 22	2.66e-28	28.829	89	423	640	662	1577776	YP_009111331.1	12174358	12174668	+	5e-126	Unknown		rnd-1_family-196	358	12175878	12176703	+	0	DNA		rnd-5_family-202	1577
Canu_ChuLike97	scaffold_3	NW_021838465.1	15418259	15420172	+	1913	Chuviridae-like	Chuvirus Mos8Chu0	0	40.735	97	5	625	665	1925502	API61888.1	glycoprotein	Wuhan Mosquito Virus 8	1.84e-111	31.457	94	1	599	653	1608133	YP_009177720.1	15417260	15418259	+	0	LTR		rnd-5_family-200	5156	15420173	15420770	+	0	LTR		rnd-5_family-200	5156
Canu_ChuLike98	scaffold_3	NW_021838465.1	28011642	28013174	+	1532	Chuviridae-like	Chuvirus Mos8Chu0	8.18e-139	42.052	97	3	498	665	1925502	API61888.1	glycoprotein	Wuhan Mosquito Virus 8	4.95e-83	31.653	97	1	491	653	1608133	YP_009177720.1	28010643	28011337	+	1.03e-77	LTR		rnd-5_family-200	5156	28013175	28013757	+	0	LTR	Gypsy	rnd-1_family-1263	598
Canu_ChuLike99	scaffold_3	NW_021838465.1	28013753	28014166	+	413	Chuviridae-like	Guato virus	7.54e-84	99.27	99	26	162	185	1795437	ANW72251.1	putative glycoprotein	Hubei chuvirus-like virus 3	7.27e-15	34.444	65	524	613	688	1922858	YP_009337090.1	28013160	28013753	+	0	LTR	Gypsy	rnd-1_family-1263	598	28014396	28015166	+	0	DNA		rnd-5_family-202	1577
Canu_ChuLike100	scaffold_3	NW_021838465.1	39146356	39148269	+	1913	Chuviridae-like	Chuvirus Mos8Chu0	0	40.735	97	5	625	665	1925502	API61888.1	glycoprotein	Wuhan Mosquito Virus 8	1.84e-111	31.457	94	1	599	653	1608133	YP_009177720.1	39145357	39146356	+	0	LTR		rnd-5_family-200	5156	39148270	39148866	+	0	LTR		rnd-5_family-200	5156
Canu_ChuLike101	scaffold_3	NW_021838465.1	39714926	39716839	-	1913	Chuviridae-like	Chuvirus Mos8Chu0	0	40.735	97	5	625	665	1925502	API61888.1	glycoprotein	Wuhan Mosquito Virus 8	2.31e-111	31.457	94	1	599	653	1608133	YP_009177720.1	39714330	39714926	-	0	LTR		rnd-5_family-200	5156	39716840	39717839	-	0	LTR		rnd-5_family-200	5156
Canu_Un74	scaffold_3	NW_021838465.1	67718295	67719998	+	1703	Unclassified	Kaiowa virus	2.74e-179	66.957	61	1	345	399	1795439	ASV45863.1	glycoprotein	Wuhan Mosquito Virus 8	3.02e-103	32.176	96	58	599	653	1608133	YP_009177720.1	67717296	67718292	+	0	LTR		rnd-5_family-200	5156	67719999	67720595	+	0	LTR		rnd-5_family-200	5156
Canu_ChuLike102	scaffold_3	NW_021838465.1	74684578	74686575	-	1997	Chuviridae-like	Chuvirus Mos8Chu0	3.46e-180	40.541	93	5	628	665	1925502	API61888.1	glycoprotein	Wuhan Mosquito Virus 8	4.04e-111	31.457	90	1	599	653	1608133	YP_009177720.1	74684066	74684578	-	0	LTR		rnd-5_family-200	5156	74686684	74687575	-	0	LTR		rnd-5_family-200	5156
Canu_Un75	scaffold_3	NW_021838465.1	88360603	88362450	+	1847	Unclassified	Kaiowa virus	0	98.571	57	1	350	399	1795439	ASV45863.1	putative glycoprotein	Hubei chuvirus-like virus 3	4.82e-105	31.24	98	13	616	688	1922858	YP_009337090.1
Canu_Un76	scaffold_3	NW_021838465.1	95423575	95425422	+	1847	Unclassified	Kaiowa virus	0	98.571	57	1	350	399	1795439	ASV45863.1	putative glycoprotein	Hubei chuvirus-like virus 3	2.37e-104	31.24	98	13	616	688	1922858	YP_009337090.1
Canu_Un77	scaffold_3	NW_021838465.1	98436808	98438217	+	1409	Unclassified	Kaiowa virus	2.53e-60	57.862	43	50	206	399	1795439	ASV45863.1	glycoprotein	Wuhan Mosquito Virus 8	3.38e-37	40	90	10	44	653	1608133	YP_009177720.1	98435809	98436215	+	4.68e-158	Unknown		rnd-1_family-363	840									Cluster854	98430078	98484744	54666	1950	698
Canu_ChuLike103	scaffold_3	NW_021838465.1	98438452	98440020	+	1568	Chuviridae-like	Chuvirus Mos8Chu0	4.11e-164	76.623	99	340	416	665	1925502	API61888.1	putative glycoprotein	Imjin River virus 1	5.74e-52	46.154	85	329	406	653	1758883	YP_009182178.1	98437631	98438392	+	3.39e-33	LTR		rnd-5_family-200	5156									Cluster854	98430078	98484744	54666	1950	698
Canu_Xinmo2	scaffold_3	NW_021838465.1	98454747	98455211	+	464	Xinmoviridae	Aedes aegypti anphevirus	1.41e-21	53.75	52	301	380	647	2059675	AWK27461.1	glycoprotein	Culex mononega-like virus 2	1.29e-17	51.25	52	282	360	638	2010272	YP_009388620.1																	Cluster854	98430078	98484744	54666	1950	698
Canu_Rhabdo45	scaffold_3	NW_021838465.1	98464024	98465490	+	1466	Rhabdoviridae	Ekpoma virus 1	7.88e-44	26.824	95	5	421	429	1987020	YP_009505504.1	N protein	Ekpoma virus 1	5.1e-44	26.824	95	5	421	429	1987020	YP_009505504.1																	Cluster854	98430078	98484744	54666	1950	698
Canu_ChuLike104	scaffold_3	NW_021838465.1	98569847	98571760	+	1913	Chuviridae-like	Chuvirus Mos8Chu0	1.13e-180	40.575	97	5	625	665	1925502	API61888.1	glycoprotein	Wuhan Mosquito Virus 8	1.57e-111	31.457	94	1	599	653	1608133	YP_009177720.1	98568848	98569847	+	0	LTR		rnd-5_family-200	5156	98571761	98572357	+	0	LTR		rnd-5_family-200	5156
Canu_ChuLike105	scaffold_3	NW_021838465.1	100553474	100555408	-	1934	Chuviridae-like	Chuvirus Mos8Chu0	0	41.544	94	6	612	665	1925502	API61888.1	glycoprotein	Wuhan Mosquito Virus 8	2.95e-115	30.817	99	3	646	653	1608133	YP_009177720.1	100553326	100553398	-	2.28e-16	LTR		rnd-5_family-200	5156	100555438	100556408	-	2.42e-174	LTR		rnd-5_family-200	5156
Canu_ChuLike106	scaffold_3	NW_021838465.1	106702123	106704036	+	1913	Chuviridae-like	Chuvirus Mos8Chu0	0	40.735	97	5	625	665	1925502	API61888.1	glycoprotein	Wuhan Mosquito Virus 8	9.84e-111	31.291	94	1	599	653	1608133	YP_009177720.1	106701124	106702123	+	0	LTR		rnd-5_family-200	5156	106704037	106704633	+	0	LTR		rnd-5_family-200	5156
Canu_ChuLike107	scaffold_3	NW_021838465.1	111890299	111892215	-	1916	Chuviridae-like	Chuvirus Mos8Chu0	1.26e-174	40.26	96	5	615	665	1925502	API61888.1	glycoprotein	Wuhan Mosquito Virus 8	1.35e-107	30.988	93	1	592	653	1608133	YP_009177720.1	111889705	111890299	-	0	LTR		rnd-5_family-200	5156	111892324	111893215	-	0	LTR		rnd-5_family-200	5156
Canu_ChuLike108	scaffold_30	NW_021838466.1	7601637	7602926	+	1289	Chuviridae-like	Chuvirus Mos8Chu0	2.2e-99	42.118	94	48	445	665	1925502	API61888.1	putative glycoprotein	Hubei chuvirus-like virus 3	3.58e-63	31.606	89	51	431	688	1922858	YP_009337090.1	7600675	7600939	-	3.16e-122	DNA	Sola-1	rnd-1_family-604	265
Canu_ChuLike109	scaffold_30	NW_021838466.1	7605658	7606335	+	677	Chuviridae-like	Guato virus	2.16e-104	67.788	92	48	252	281	1795437	ANW72245.1	putative glycoprotein	Hubei chuvirus-like virus 3	1.7e-28	28.037	94	434	644	688	1922858	YP_009337090.1
Canu_ChuLike110	scaffold_30	NW_021838466.1	7626206	7626763	+	557	Chuviridae-like	Chuvirus Mos8Chu0	3.7e-30	41.772	85	24	181	665	1925502	API61888.1	putative glycoprotein	Hubei chuvirus-like virus 3	2.19e-12	27.222	96	12	188	688	1922858	YP_009337090.1									7626816	7627080	+	3.85e-121	DNA	Sola-1	rnd-1_family-428	267
Canu_Un78	scaffold_30	NW_021838466.1	7644006	7645198	-	1192	Unclassified	Kaiowa virus	1.11e-144	81.538	87	281	345	399	1795439	ASV45863.1	glycoprotein	Wuhan Mosquito Virus 8	2.5e-54	38.372	93	543	626	653	1608133	YP_009177720.1	7643325	7643588	-	2.13e-124	SINE	tRNA	rnd-1_family-173	266	7645538	7646002	-	0	Unknown		rnd-5_family-1114	471
Canu_Mesoni1	scaffold_30	NW_021838466.1	7661747	7662334	-	587	Mesoniviridae	Kamphang Phet virus	2.7e-26	35.417	96	748	932	2558	1332247	AGL73194.1	pp1a polyprotein	Dak Nong virus	1.12e-24	35.417	96	743	927	2554	1238455	YP_009505589.1	7661157	7661411	+	7.96e-54	DNA	Sola-2	rnd-1_family-265	254
Canu_Un79	scaffold_308	NW_021838475.1	255811	257475	-	1664	Unclassified	Kaiowa virus	1.57e-179	66.957	62	1	345	399	1795439	ASV45863.1	glycoprotein	Wuhan Mosquito Virus 8	8.85e-100	31.599	97	67	599	653	1608133	YP_009177720.1	255214	255811	-	0	LTR		rnd-5_family-200	5156	257476	258475	-	0	LTR		rnd-5_family-200	5156
Canu_ChuLike111	scaffold_31	NW_021838477.1	1491600	1493552	-	1952	Chuviridae-like	Chuvirus Mos8Chu0	0	41.779	92	24	619	665	1925502	API61888.1	putative glycoprotein	Hubei chuvirus-like virus 3	2.81e-104	27.864	99	12	652	688	1922858	YP_009337090.1									1494427	1494527	-	7.47e-10	LTR		rnd-5_family-200	5156
Canu_ChuLike112	scaffold_316	NW_021838484.1	325140	327053	+	1913	Chuviridae-like	Chuvirus Mos8Chu0	0	40.735	97	5	625	665	1925502	API61888.1	glycoprotein	Wuhan Mosquito Virus 8	1.84e-111	31.457	94	1	599	653	1608133	YP_009177720.1	324141	325140	+	0	LTR		rnd-5_family-200	5156	327054	327649	+	0	LTR		rnd-5_family-200	5156
Canu_Un80	scaffold_32	NW_021838488.1	284976	286844	+	1868	Unclassified	Kaiowa virus	5.83e-178	66.957	55	1	345	399	1795439	ASV45863.1	glycoprotein	Wuhan Mosquito Virus 8	9.72e-107	31.137	97	1	599	653	1608133	YP_009177720.1	283977	284976	+	0	LTR		rnd-5_family-200	5156	286845	287442	+	0	LTR		rnd-5_family-200	5156
Canu_ChuLike113	scaffold_321	NW_021838490.1	234740	236653	+	1913	Chuviridae-like	Chuvirus Mos8Chu0	1.32e-180	40.575	97	5	625	665	1925502	API61888.1	glycoprotein	Wuhan Mosquito Virus 8	9.23e-111	31.291	94	1	599	653	1608133	YP_009177720.1	233741	234740	+	0	LTR		rnd-5_family-200	5156	236654	237250	+	0	LTR		rnd-5_family-200	5156
Canu_Un81	scaffold_327	NW_021838496.1	257539	259386	-	1847	Unclassified	Kaiowa virus	0	100	44	1	270	270	1795439	ANW72242.1	putative glycoprotein	Hubei chuvirus-like virus 3	4.38e-105	31.24	98	13	616	688	1922858	YP_009337090.1
Canu_ChuLike114	scaffold_33	NW_021838499.1	6400648	6402561	-	1913	Chuviridae-like	Chuvirus Mos8Chu0	0	40.735	97	5	625	665	1925502	API61888.1	glycoprotein	Wuhan Mosquito Virus 8	2.31e-111	31.457	94	1	599	653	1608133	YP_009177720.1	6400051	6400648	-	0	LTR		rnd-5_family-200	5156	6402562	6403561	-	0	LTR		rnd-5_family-200	5156
Canu_Un82	scaffold_33	NW_021838499.1	8008563	8010410	+	1847	Unclassified	Kaiowa virus	0	98.571	57	1	350	399	1795439	ASV45863.1	putative glycoprotein	Hubei chuvirus-like virus 3	4.87e-105	31.24	98	13	616	688	1922858	YP_009337090.1
Canu_ChuLike115	scaffold_334	NW_021838504.1	505244	506110	-	866	Chuviridae-like	Guato virus	5.06e-169	90.182	92	1	275	281	1795437	ANW72245.1	hypothetical protein	Dendrolimus punctatus cypovirus 22	5.99e-31	29.362	80	410	640	662	1577776	YP_009111331.1	504245	505068	-	0	DNA		rnd-5_family-202	1577	506185	507110	-	5.71e-119	LTR		rnd-5_family-200	5156
Canu_ChuLike116	scaffold_334	NW_021838504.1	506124	507395	-	1271	Chuviridae-like	Chuvirus Mos8Chu0	8.01e-102	39.858	99	3	425	665	1925502	API61888.1	putative glycoprotein	Hubei chuvirus-like virus 3	1.66e-66	32.471	99	12	430	688	1922858	YP_009337090.1	505374	505957	-	1.1e-83	LTR		rnd-5_family-200	5156	507730	508393	-	1.11e-64	LTR		rnd-5_family-200	5156
Canu_ChuLike117	scaffold_336	NW_021838506.1	35086	37058	+	1972	Chuviridae-like	Guato virus	4.29e-150	98.286	43	110	284	289	1795437	ANW72248.1	glycoprotein	Wuhan Mosquito Virus 8	4.66e-84	31.924	98	1	468	653	1608133	YP_009177720.1	34087	34772	+	1.54e-75	LTR		rnd-5_family-200	5156	37234	38058	+	0	DNA		rnd-5_family-202	1577
Canu_Un83	scaffold_34	NW_021838510.1	2245776	2247767	+	1991	Unclassified	Kaiowa virus	0	74.785	53	1	349	399	1795439	ASV45863.1	glycoprotein	Wuhan Mosquito Virus 8	4.29e-110	32.131	92	1	607	653	1608133	YP_009177720.1
Canu_ChuLike118	scaffold_34	NW_021838510.1	3944336	3946255	+	1919	Chuviridae-like	Guato virus	0	100	42	1	266	289	1795437	ANW72248.1	putative glycoprotein	Hubei chuvirus-like virus 3	2.02e-104	30.807	94	15	613	688	1922858	YP_009337090.1	3943337	3944022	+	1.54e-75	LTR		rnd-5_family-200	5156	3946485	3947255	+	0	DNA		rnd-5_family-202	1577
Canu_Un84	scaffold_34	NW_021838510.1	4488623	4488838	-	215	Unclassified	Kaiowa virus	3.47e-29	74.242	92	83	148	198	1795439	ASV45862.1	putative glycoprotein	Hubei chuvirus-like virus 3	1.56e-11	44.118	95	559	625	688	1922858	YP_009337090.1									4488870	4489838	-	0	Unknown		rnd-4_family-29	3424
Canu_Un85	scaffold_34	NW_021838510.1	4956262	4958284	+	2022	Unclassified	Kaiowa virus	0	68.392	54	30	382	399	1795439	ASV45863.1	glycoprotein	Wuhan Mosquito Virus 8	1.79e-91	33.016	90	293	607	653	1608133	YP_009177720.1	4955272	4955706	+	9.71e-15	LTR		rnd-5_family-200	5156
Canu_Rhabdo46	scaffold_346	NW_021838517.1	484267	484876	-	609	Rhabdoviridae	Guadeloupe Culex rhabdovirus	2e-26	39.22	89	274	455	515	2125980	AVP26973.1	ORF1	Wuhan Mosquito Virus 9	3e-19	34.55	97	2	205	279	1608134	YP_009305108.1	483745	483851	-	6.98e-42	DNA	MULE-MuDR	rnd-1_family-1176	193	485711	485794	+	1.75e-30	DNA	MULE-MuDR	rnd-1_family-1176	193
Canu_Un151	scaffold_348	NW_021838519.1	455104	456954	+	1850	Unclassified	Culex mononega-like virus 2	1.09e-132	41.056	94	21	598	2079	2010272	ASA47322.1	RdRp	Culex mononega-like virus 2	1.36e-132	41.056	94	21	598	2079	2010272	YP_009388622.1	454120	454489	-	1.26e-57	LTR	Gypsy	rnd-1_family-651	592	457470	457726	-	5.35e-113	Unknown		rnd-1_family-649	526
Canu_Un86	scaffold_38	NW_021838554.1	98812	100659	-	1847	Unclassified	Kaiowa virus	0	100	44	1	270	270	1795439	ANW72242.1	putative glycoprotein	Hubei chuvirus-like virus 3	4.38e-105	31.24	98	13	616	688	1922858	YP_009337090.1
Canu_ChuLike119	scaffold_39	NW_021838565.1	4201332	4203260	-	1928	Chuviridae-like	Guato virus	0	100	41	1	265	289	1795437	ANW72248.1	putative glycoprotein	Hubei chuvirus-like virus 3	2.1e-105	30.972	94	15	613	688	1922858	YP_009337090.1	4200333	4201102	-	0	DNA		rnd-5_family-202	1577	4203565	4204259	-	2e-80	LTR		rnd-5_family-200	5156
Canu_ChuLike120	scaffold_395	NW_021838571.1	452007	452651	+	644	Chuviridae-like	Hubei coleoptera virus 3	6.84e-12	24.074	99	1060	1272	2459	1922862	YP_009336866.1	RNA-dependent RNA polymerase	Hubei coleoptera virus 3	4.43e-12	24.074	99	1060	1272	2459	1922862	YP_009336866.1	451217	451571	-	9.64e-167	Unknown		rnd-1_family-179	363	453151	453478	-	5.01e-88	LTR	Gypsy	rnd-1_family-630	613	Cluster914	450025	459440	9415	153	101
Canu_Un134	scaffold_395	NW_021838571.1	452657	452866	+	209	Unclassified Mononegavirales	Scaldis River bee virus	1.24e-09	40.323	89	1344	1403	2533	1931096	APT68159.1	NA	NA	-1	.	.	.	.	.	.	.	451658	451828	-	2.43e-79	SINE	tRNA	rnd-1_family-173	266	453478	453866	+	1.25e-171	LINE	RTE-BovB	rnd-1_family-118	3429	Cluster914	450025	459440	9415	153	101
Canu_Un152	scaffold_4	NW_021838576.1	22207454	22207987	-	533	Unclassified	Culex mononega-like virus 2	5.91e-33	40.12	93	293	459	508	2010272	ASA47287.1	hypothetical protein	Culex mononega-like virus 2	3.99e-33	40.12	93	293	459	508	2010272	YP_009388617.1	22207033	22207334	+	9.06e-104	Unknown		rnd-4_family-889	359	22208939	22208987	-	7.97e-16	Unknown		rnd-1_family-368	784
Canu_Un87	scaffold_4	NW_021838576.1	40127536	40127751	-	215	Unclassified	Kaiowa virus	3.81e-27	74.242	88	286	351	399	1795439	ASV45863.1	putative glycoprotein	Hubei chuvirus-like virus 3	1.16e-12	37.681	96	559	627	688	1922858	YP_009337090.1									40128397	40128599	+	2.6e-85	LINE	RTE-BovB	rnd-1_family-155	219
Canu_ChuLike121	scaffold_4	NW_021838576.1	40128896	40130581	-	1685	Chuviridae-like	Chuvirus Mos8Chu0	5.94e-152	40.476	97	7	549	665	1925502	API61888.1	putative glycoprotein	Imjin River virus 1	9.17e-94	31.667	96	3	534	653	1758883	YP_009182178.1	40128397	40128599	+	2.6e-85	LINE	RTE-BovB	rnd-1_family-155	219
Canu_ChuLike122	scaffold_4	NW_021838576.1	65562055	65563968	+	1913	Chuviridae-like	Chuvirus Mos8Chu0	0	40.735	97	5	625	665	1925502	API61888.1	glycoprotein	Wuhan Mosquito Virus 8	1.84e-111	31.457	94	1	599	653	1608133	YP_009177720.1	65561056	65562055	+	0	LTR		rnd-5_family-200	5156	65563969	65564565	+	0	LTR		rnd-5_family-200	5156
Canu_Rhabdo47	scaffold_4	NW_021838576.1	69887864	69888301	-	437	Rhabdoviridae	Grenada mosquito rhabdovirus 1	3.72e-26	37.415	99	326	469	515	2125980	AVP26973.1	ORF1	Wuhan Mosquito Virus 9	9.34e-20	35.461	97	66	206	279	1608134	YP_009305108.1	69887055	69887321	-	2.59e-123	DNA		rnd-1_family-495	267									Cluster973	69870034	69954909	84875	812	594.55
Canu_Un88	scaffold_4	NW_021838576.1	69915254	69917153	-	1899	Unclassified	Kaiowa virus	7.78e-123	66.12	55	172	354	399	1795439	ASV45863.1	hypothetical protein	Dendrolimus punctatus cypovirus 22	5.56e-53	29.438	93	27	453	662	1577776	YP_009111331.1	69914581	69914697	+	1.64e-43	DNA	Kolobok-E	rnd-1_family-1188	751									Cluster973	69870034	69954909	84875	812	594.55
Canu_Phenui2	scaffold_4	NW_021838576.1	69941074	69941409	-	335	Phenuiviridae	Phasi Charoen-like phasivirus	8.99e-42	60.36	99	1	111	268	1980610	YP_009505333.1	Nucleocapsid	Phasi Charoen-like phasivirus	5.81e-42	60.36	99	1	111	268	1980610	YP_009505333.1																	Cluster973	69870034	69954909	84875	812	594.55
Canu_Phenui3	scaffold_4	NW_021838576.1	73071217	73071552	+	335	Phenuiviridae	Phasi Charoen-like phasivirus	1.34e-42	61.261	99	2	112	268	1980610	YP_009505333.1	Nucleocapsid	Phasi Charoen-like phasivirus	8.64e-43	61.261	99	2	112	268	1980610	YP_009505333.1																	Cluster974	73050074	73169981	119907	2000	502
Canu_ChuLike123	scaffold_4	NW_021838576.1	73120213	73120368	+	155	Chuviridae-like	Guato virus	4.4e-14	69.388	87	20	68	289	1795437	ANW72248.1	NA	NA	-1	.	.	.	.	.	.	.	73120040	73120213	+	4.7e-63	DNA	Zator	rnd-1_family-258	171	73120377	73120868	+	7.46e-29	LTR		rnd-5_family-200	5156	Cluster974	73050074	73169981	119907	2000	502
Canu_Un89	scaffold_4	NW_021838576.1	73120451	73120895	+	444	Unclassified	Kaiowa virus	4e-49	65.82	93	5	144	198	1795439	ASV45862.1	glycoprotein	Wuchang Cockroach Virus 3	3e-14	48.28	39	550	607	675	1608099	YP_009666257.1	73120040	73120213	+	4.7e-63	DNA	Zator	rnd-1_family-258	171	73121466	73121582	-	1.64e-43	DNA	Kolobok-E	rnd-1_family-1188	751	Cluster974	73050074	73169981	119907	2000	502
Canu_Rhabdo48	scaffold_4	NW_021838576.1	73132733	73133335	+	602	Rhabdoviridae	Grenada mosquito rhabdovirus 1	3.1e-36	38.191	98	274	469	515	2125980	AVP26973.1	ORF1	Wuhan Mosquito Virus 9	3.79e-27	32.673	99	10	211	279	1608134	YP_009305108.1																	Cluster974	73050074	73169981	119907	2000	502
Canu_Un90	scaffold_4	NW_021838576.1	73506610	73507032	-	422	Unclassified	Hubei virga-like virus 12	8.48e-43	48.936	99	18	158	170	1923327	YP_009337823.1	hypothetical protein	Hubei virga-like virus 12	5.49e-43	48.936	99	18	158	170	1923327	YP_009337823.1	73505642	73505953	+	5.73e-62	LTR	Gypsy	rnd-1_family-651	592									Cluster975	73505066	73519837	14771	513	490
Canu_ChuLike124	scaffold_4	NW_021838576.1	94725385	94727298	+	1913	Chuviridae-like	Chuvirus Mos8Chu0	0	40.735	97	5	625	665	1925502	API61888.1	glycoprotein	Wuhan Mosquito Virus 8	1.84e-111	31.457	94	1	599	653	1608133	YP_009177720.1	94724386	94725385	+	0	LTR		rnd-5_family-200	5156	94727299	94727895	+	0	LTR		rnd-5_family-200	5156
Canu_Un91	scaffold_4	NW_021838576.1	112608082	112609929	+	1847	Unclassified	Kaiowa virus	0	98.571	57	1	350	399	1795439	ASV45863.1	putative glycoprotein	Hubei chuvirus-like virus 3	8.94e-104	31.074	98	13	616	688	1922858	YP_009337090.1
Canu_Un153	scaffold_4	NW_021838576.1	120400948	120401979	+	1031	Unclassified	Culex mononega-like virus 2	8.32e-87	45.201	94	86	403	638	2010272	YP_009388620.1	glycoprotein	Culex mononega-like virus 2	5.38e-87	45.201	94	86	403	638	2010272	YP_009388620.1	120400013	120400541	-	0	DNA	CMC-Chapaev	rnd-1_family-328	1392									Cluster1026	120355104	120403248	48144	548.5	61.8
Canu_ChuLike125	scaffold_40	NW_021838577.1	4688005	4689918	-	1913	Chuviridae-like	Chuvirus Mos8Chu0	0	40.895	97	5	625	665	1925502	API61888.1	glycoprotein	Wuhan Mosquito Virus 8	2.79e-111	31.457	94	1	599	653	1608133	YP_009177720.1	4687408	4688005	-	0	LTR		rnd-5_family-200	5156	4689919	4690918	-	0	LTR		rnd-5_family-200	5156
Canu_Rhabdo49	scaffold_407	NW_021838585.1	428109	428652	+	543	Rhabdoviridae	Mavingoni virus	2e-26	32.26	100	123	303	431	2603829	QED88193.1	nucleoprotein	Malpais Spring vesiculovirus	3e-24	34.29	55	135	304	425	1972570	YP_009094174.1	289042	289577	+	1.03e-77	LTR		rnd-5_family-200	5156	289798	290788	+	1.99e-137	LTR		rnd-5_family-200	5156	Cluster1034	405106	514868	109762	2180	831
Canu_Rhabdo50	scaffold_407	NW_021838585.1	537709	538083	+	374	Rhabdoviridae	Scophthalmus maximus rhabdovirus	3.52e-10	30.645	99	17	140	525	936149	YP_009094345.1	glycoprotein	Scophthalmus maximus rhabdovirus	2.28e-10	30.645	99	17	140	525	936149	YP_009094345.1
Canu_ChuLike126	scaffold_41	NW_021838588.1	4055274	4057255	-	1981	Chuviridae-like	Guato virus	0	99.647	43	1	283	289	1795437	ANW72248.1	putative glycoprotein	Hubei chuvirus-like virus 3	3.76e-86	31.975	91	12	326	688	1922858	YP_009337090.1	4054275	4055098	-	0	DNA		rnd-5_family-202	1577	4057560	4058253	-	1.54e-75	LTR		rnd-5_family-200	5156
Canu_Un92	scaffold_42	NW_021838599.1	295443	297436	-	1993	Unclassified	Kaiowa virus	0	100	60	241	398	399	1795439	ASV45863.1	putative glycoprotein	Hubei chuvirus-like virus 3	8.02e-86	31.126	94	526	676	688	1922858	YP_009337090.1	294446	294599	+	7.97e-35	LINE	R1	rnd-6_family-72	3690
Canu_Rhabdo51	scaffold_42	NW_021838599.1	2628716	2629354	+	638	Rhabdoviridae	Grenada mosquito rhabdovirus 1	3.46e-40	37.143	97	274	480	515	2125980	QBQ64911.1	ORF1	Wuhan Mosquito Virus 9	1.98e-30	33.036	99	10	233	279	1608134	YP_009305108.1	2627776	2627858	-	2.14e-29	DNA	MULE-MuDR	rnd-1_family-1176	193	2629614	2629724	-	2.78e-34	DNA	MULE-MuDR	rnd-1_family-1176	193
Canu_Rhabdo52	scaffold_42	NW_021838599.1	5392814	5393104	-	290	Rhabdoviridae	Grenada mosquito rhabdovirus 1	1.69e-11	38.318	97	323	428	515	2125980	AVP26973.1	ORF1	Wuhan Mosquito Virus 9	1.81e-11	41.284	99	63	170	279	1608134	YP_009305108.1	5391967	5392347	-	1.63e-176	Unknown		rnd-1_family-993	382									Cluster1046	5375089	5504951	129862	4703.33	3045.33
Canu_Phenui4	scaffold_42	NW_021838599.1	5393872	5394101	-	229	Phenuiviridae	Phasi Charoen-like phasivirus	3.38e-14	61.765	99	27	60	268	1980610	AIF71032.1	Nucleocapsid	Phasi Charoen-like phasivirus	4.11e-13	60	99	27	61	268	1980610	YP_009505333.1																	Cluster1046	5375089	5504951	129862	4703.33	3045.33
Canu_Rhabdo53	scaffold_42	NW_021838599.1	5425827	5426180	-	353	Rhabdoviridae	Grenada mosquito rhabdovirus 1	2.02e-20	38.596	97	274	387	515	2125980	QBQ64911.1	ORF1	Wuhan Mosquito Virus 9	5.76e-18	36.134	99	9	127	279	1608134	YP_009305108.1	5425693	5425827	+	1.64e-43	Unknown		rnd-1_family-517	138	5426194	5426373	+	1.35e-82	LINE	I	rnd-1_family-252	180	Cluster1046	5375089	5504951	129862	4703.33	3045.33
Canu_Flavi20	scaffold_42	NW_021838599.1	5459271	5459441	-	170	Flaviviridae	La Tina virus	1.76e-12	55.357	99	443	498	3349	2045187	ATL63282.1	truncated polyprotein	Aedes flavivirus	3.26e-12	53.571	99	435	490	1356	390845	YP_009259320.1																	Cluster1046	5375089	5504951	129862	4703.33	3045.33
Canu_ChuLike127	scaffold_42	NW_021838599.1	5467261	5467959	-	698	Chuviridae-like	Chuvirus Mos8Chu0	5.84e-92	69.697	84	8	205	665	1925502	API61888.1	putative glycoprotein	Hubei chuvirus-like virus 3	5.52e-18	29.717	90	1	209	688	1922858	YP_009337090.1	5466797	5466900	+	6.98e-42	Unknown		rnd-1_family-548	104									Cluster1046	5375089	5504951	129862	4703.33	3045.33
Canu_Flavi21	scaffold_42	NW_021838599.1	5473595	5474387	-	792	Flaviviridae	Aedes flavivirus	4.07e-60	88	76	284	308	343	390845	AIW09281.1	flavivirus polyprotein	Parramatta River virus	8.4e-56	81.25	81	3279	3294	3384	1708654	YP_009164029.1	5472632	5472983	+	2.59e-123	DNA	Crypton-I	rnd-1_family-143	411									Cluster1046	5375089	5504951	129862	4703.33	3045.33
Canu_Flavi22	scaffold_42	NW_021838599.1	5474523	5474845	-	322	Flaviviridae	La Tina virus	1.05e-24	60.87	99	443	511	3349	2045187	ATL63282.1	truncated polyprotein	Aedes flavivirus	2.66e-24	59.42	99	435	503	1356	390845	YP_009259320.1																	Cluster1046	5375089	5504951	129862	4703.33	3045.33
Canu_Flavi23	scaffold_42	NW_021838599.1	5486742	5487922	-	1180	Flaviviridae	Aedes flavivirus	3.66e-73	88.889	89	3238	3255	3341	390845	YP_003029843.1	flavivirus polyprotein	Aedes flavivirus	2.51e-73	88.889	89	3238	3255	3341	390845	YP_003029843.1	5485777	5486130	+	1.99e-156	DNA	CMC-Chapaev	rnd-1_family-852	353	5488332	5488643	-	2.59e-142	DNA	CMC-EnSpm	rnd-1_family-88	727	Cluster1046	5375089	5504951	129862	4703.33	3045.33
Canu_ChuLike128	scaffold_422	NW_021838602.1	273516	275499	-	1983	Chuviridae-like	Chuvirus Mos8Chu0	5.9e-111	36.259	93	5	436	665	1925502	API61888.1	putative glycoprotein	Hubei chuvirus-like virus 3	2.34e-67	28.341	98	10	439	688	1922858	YP_009337090.1																	Cluster1048	265074	290994	25920	561	372.5
Canu_Rhabdo54	scaffold_422	NW_021838602.1	307651	308565	-	914	Rhabdoviridae	Rhabdovirus 024698	2.65e-21	27.778	56	94	270	508	1094299	AEQ59502.1	glycoprotein	Yug Bogdanovac vesiculovirus	4.09e-21	27.66	74	57	280	559	1972567	YP_009094276.1	307509	307587	-	1.35e-25	Unknown		rnd-1_family-363	840									Cluster1049	305052	334987	29935	425.5	241.5
Canu_Un93	scaffold_423	NW_021838603.1	314612	316597	-	1985	Unclassified	Kaiowa virus	0	98.958	60	1	192	399	1795439	ASV45863.1	putative glycoprotein	Hubei chuvirus-like virus 3	4.99e-68	30.99	89	85	465	688	1922858	YP_009337090.1									316780	317346	-	0	Unknown		rnd-1_family-1295	570
Canu_ChuLike129	scaffold_44	NW_021838621.1	5611262	5613142	+	1880	Chuviridae-like	Chuvirus Mos8Chu0	0	40.735	99	5	625	665	1925502	API61888.1	glycoprotein	Wuhan Mosquito Virus 8	1.29e-111	31.457	96	1	599	653	1608133	YP_009177720.1	5610263	5611262	+	0	LTR		rnd-5_family-200	5156	5613143	5613739	+	0	LTR		rnd-5_family-200	5156
Canu_Un94	scaffold_442	NW_021838624.1	113771	115759	+	1988	Unclassified	Kaiowa virus	1.18e-164	98.024	60	147	399	399	1795439	ASV45863.1	putative glycoprotein	Hubei chuvirus-like virus 3	3.83e-66	31.092	91	189	425	688	1922858	YP_009337090.1	112772	113037	-	1.53e-113	Unknown		rnd-1_family-238	950	116395	116712	-	4.68e-139	DNA	Zator	rnd-1_family-848	529
Canu_Un95	scaffold_446	NW_021838628.1	37612	39459	-	1847	Unclassified	Kaiowa virus	0	99.63	44	1	270	270	1795439	ANW72242.1	putative glycoprotein	Hubei chuvirus-like virus 3	1.07e-103	31.074	98	13	616	688	1922858	YP_009337090.1
Canu_Un96	scaffold_446	NW_021838628.1	283237	285104	+	1867	Unclassified	Kaiowa virus	1.57e-177	66.957	55	1	345	399	1795439	ASV45863.1	glycoprotein	Wuhan Mosquito Virus 8	8.45e-91	33.714	96	250	599	653	1608133	YP_009177720.1	282238	283237	+	0	LTR		rnd-5_family-200	5156	285105	285701	+	0	LTR		rnd-5_family-200	5156
Canu_ChuLike130	scaffold_45	NW_021838632.1	1885644	1887626	+	1982	Chuviridae-like	Guato virus	0	98.556	42	3	279	281	1795437	ANW72245.1	putative glycoprotein	Hubei chuvirus-like virus 3	4.14e-105	30.327	97	15	642	688	1922858	YP_009337090.1	1884646	1885330	+	3.38e-71	LTR		rnd-5_family-200	5156	1887793	1888626	+	0	DNA		rnd-5_family-202	1577
Canu_Un97	scaffold_467	NW_021838651.1	273858	275705	+	1847	Unclassified	Kaiowa virus	0	98.571	57	1	350	399	1795439	ASV45863.1	putative glycoprotein	Hubei chuvirus-like virus 3	8.64e-105	31.074	98	13	616	688	1922858	YP_009337090.1
Canu_ChuLike131	scaffold_47	NW_021838654.1	4368771	4369952	+	1181	Chuviridae-like	Chuvirus Mos8Chu0	1.25e-94	40	99	5	394	665	1925502	API61888.1	glycoprotein	Wuhan Mosquito Virus 8	2.9e-62	31.969	99	1	386	653	1608133	YP_009177720.1	4367772	4368771	+	0	LTR		rnd-5_family-200	5156	4370143	4370952	+	0	LTR		rnd-5_family-200	5156
Canu_ChuLike132	scaffold_47	NW_021838654.1	4370086	4370835	+	749	Chuviridae-like	Guato virus	6.11e-126	70.711	95	17	255	289	1795437	ANW72248.1	glycoprotein	Wuhan Mosquito Virus 8	4.21e-34	31.193	87	386	599	653	1608133	YP_009177720.1	4369087	4369949	+	0	LTR		rnd-5_family-200	5156	4370836	4371431	+	0	LTR		rnd-5_family-200	5156
Canu_Un98	scaffold_47	NW_021838654.1	5098822	5100669	-	1847	Unclassified	Kaiowa virus	0	100	44	1	270	270	1795439	ANW72242.1	putative glycoprotein	Hubei chuvirus-like virus 3	4.38e-105	31.24	98	13	616	688	1922858	YP_009337090.1
Canu_Flavi24	scaffold_478	NW_021838663.1	200762	202077	-	1315	Flaviviridae	Aedes flavivirus	0	87.634	85	164	535	890	390845	YP_009259331.1	RNA-dependent RNA polymerase NS5	Aedes flavivirus	0	87.634	85	164	535	890	390845	YP_009259331.1	200239	200296	+	2.78e-15	DNA	MULE-MuDR	rnd-1_family-1176	193
Canu_Flavi25	scaffold_478	NW_021838663.1	209109	210214	-	1105	Flaviviridae	Aedes flavivirus	7.2e-178	86.345	95	2230	2478	3310	390845	QCD25342.1	flavivirus polyprotein	Aedes flavivirus	2.62e-177	85.944	95	2235	2483	3341	390845	YP_003029843.1	208943	208968	-	4.71e-06	Unknown		rnd-1_family-1102	340	210714	211214	-	0	DNA	Crypton-I	rnd-1_family-168	631
Canu_Un99	scaffold_478	NW_021838663.1	213460	215289	-	1829	Unclassified	Kaiowa virus	1.59e-177	70.909	54	1	330	399	1795439	ASV45863.1	putative glycoprotein	Imjin River virus 1	1.76e-104	31.597	94	20	591	653	1758883	YP_009182178.1
Canu_Flavi26	scaffold_478	NW_021838663.1	223703	227934	-	4231	Flaviviridae	Aedes flavivirus	0	82.609	99	2285	2583	3341	390845	YP_003029843.1	flavivirus polyprotein	Aedes flavivirus	0	82.609	99	2285	2583	3341	390845	YP_003029843.1	223527	223687	+	5.03e-31	LTR	Gypsy	rnd-1_family-1401	163
Canu_Flavi27	scaffold_478	NW_021838663.1	232955	236012	-	3057	Flaviviridae	Aedes flavivirus	0	88.462	99	716	974	3341	390845	AGJ91136.1	flavivirus polyprotein	Aedes flavivirus	0	88.462	99	716	974	3341	390845	YP_003029843.1
Canu_ChuLike133	scaffold_48	NW_021838665.1	2657439	2659336	-	1897	Chuviridae-like	Guato virus	2.96e-166	100	39	11	257	281	1795437	ANW72245.1	putative glycoprotein	Hubei chuvirus-like virus 3	1.4e-86	31.969	96	12	396	688	1922858	YP_009337090.1	2656440	2657199	-	0	DNA		rnd-5_family-202	1577	2659670	2660336	-	1.18e-70	LTR		rnd-5_family-200	5156
Canu_Un100	scaffold_486	NW_021838672.1	318028	319896	-	1868	Unclassified	Kaiowa virus	6.97e-179	66.957	55	1	345	399	1795439	ASV45863.1	glycoprotein	Wuhan Mosquito Virus 8	3.27e-111	31.457	97	1	599	653	1608133	YP_009177720.1	317846	318028	-	2.77e-91	LTR		rnd-5_family-200	5156	319897	320896	-	0	LTR		rnd-5_family-200	5156
Canu_ChuLike134	scaffold_5	NW_021838687.1	10138799	10140694	+	1895	Chuviridae-like	Chuvirus Mos8Chu0	0	42.226	97	7	614	665	1925502	API61888.1	putative glycoprotein	Imjin River virus 1	2.21e-113	31.664	98	3	613	653	1758883	YP_009182178.1
Canu_Un101	scaffold_5	NW_021838687.1	28751586	28753530	-	1944	Unclassified	Kaiowa virus	2.56e-136	57.831	56	199	363	399	1795439	ASV45863.1	putative glycoprotein	Hubei chuvirus-like virus 3	6.78e-69	31.771	92	279	470	688	1922858	YP_009337090.1	28750587	28751189	+	0	LTR		rnd-5_family-200	5156	28753829	28754513	-	3.17e-46	LTR		rnd-5_family-200	5156
Canu_Un102	scaffold_5	NW_021838687.1	29489701	29491585	+	1884	Unclassified	Kaiowa virus	6.14e-162	66.667	51	25	342	399	1795439	ASV45863.1	putative glycoprotein	Hubei chuvirus-like virus 3	2.37e-85	31.034	95	201	313	688	1922858	YP_009337090.1	29488715	29489401	+	1.18e-51	LTR		rnd-5_family-200	5156
Canu_ChuLike135	scaffold_5	NW_021838687.1	36412552	36414420	+	1868	Chuviridae-like	Chuvirus Mos8Chu0	0	40.735	99	5	625	665	1925502	API61888.1	glycoprotein	Wuhan Mosquito Virus 8	1.32e-111	31.457	97	1	599	653	1608133	YP_009177720.1	36411553	36412552	+	0	LTR		rnd-5_family-200	5156	36414421	36415017	+	0	LTR		rnd-5_family-200	5156
Canu_ChuLike136	scaffold_5	NW_021838687.1	39528088	39529956	+	1868	Chuviridae-like	Chuvirus Mos8Chu0	0	40.735	99	5	625	665	1925502	API61888.1	glycoprotein	Wuhan Mosquito Virus 8	1.32e-111	31.457	97	1	599	653	1608133	YP_009177720.1	39527089	39528088	+	0	LTR		rnd-5_family-200	5156	39529957	39530551	+	0	LTR		rnd-5_family-200	5156
Canu_Virga3	scaffold_5	NW_021838687.1	64007777	64008729	-	952	Virgaviridae	Bombus-associated virus Vir1	2e-72	53.19	96	8	309	330	2511064	QAY29261.1	hypthetical protein	Xingshan nematode virus 1	1e-46	37.78	63	2382	2683	2707	1923760	YP_009333310.1	64006790	64007303	+	6.94e-175	LTR	Gypsy	rnd-1_family-713	517	64008812	64008933	-	3.17e-27	LTR	Gypsy	rnd-6_family-1316	450
Canu_Un103	scaffold_5	NW_021838687.1	64009906	64010499	-	593	Unclassified	Blackford virus	6.95e-36	42.857	91	494	673	996	1807801	AMO03220.1	hypothetical protein	Hubei virga-like virus 1	9.15e-14	30.508	88	2218	2390	2712	1923324	YP_009337423.1	64009388	64009564	-	3.18e-08	LINE	L1-Tx1	rnd-5_family-272	1228
Canu_Un104	scaffold_5	NW_021838687.1	64585644	64586682	+	1038	Unclassified	Blackford virus	9.31e-73	60	97	789	833	996	1807801	AMO03220.1	hypothetical protein	Hubei virga-like virus 1	5.54e-40	47.273	96	2497	2547	2712	1923324	YP_009337423.1									64587174	64587682	+	0	Unknown		rnd-1_family-640	1057
Canu_Rhabdo55	scaffold_5	NW_021838687.1	64599069	64600061	-	992	Rhabdoviridae	Merida-like virus KE-2017a	1.67e-88	51.495	91	257	556	2136	1969830	YP_009551692.1	large protein	Culex tritaeniorhynchus rhabdovirus	4.97e-84	47.176	91	252	552	2123	936308	YP_009094323.1	64598070	64598353	+	8.48e-117	LTR	Gypsy	rnd-1_family-493	1047	64600709	64601061	-	1.53e-132	LTR	Gypsy	rnd-1_family-378	861
Canu_ChuLike137	scaffold_5	NW_021838687.1	65185047	65185580	+	533	Chuviridae-like	Hubei coleoptera virus 3	8.41e-14	32.143	93	356	508	2459	1922862	YP_009336866.1	RNA-dependent RNA polymerase	Hubei coleoptera virus 3	5.44e-14	32.143	93	356	508	2459	1922862	YP_009336866.1	65184048	65184175	-	2.28e-54	LINE	R1	rnd-1_family-304	218	65186114	65186279	-	3.17e-46	DNA	Zator	rnd-1_family-225	173
Canu_Un105	scaffold_5	NW_021838687.1	65185601	65186116	+	515	Unclassified	Shayang Fly Virus 1	2.57e-41	48.81	96	527	693	2459	1608065	YP_009300663.1	polymerase	Shayang Fly Virus 1	1.66e-41	48.81	96	527	693	2459	1608065	YP_009300663.1									65186547	65187043	+	0	Unknown		rnd-5_family-814	518
Canu_Un106	scaffold_5	NW_021838687.1	65684841	65686148	+	1307	Unclassified	Blackford virus	8.27e-118	45.498	97	558	975	996	1807801	AMO03220.1	hypothetical protein	Hubei virga-like virus 1	1.97e-73	35.872	93	2288	2691	2712	1923324	YP_009337423.1	65683842	65683985	-	4.7e-44	Unknown		rnd-6_family-1095	622	65686622	65687135	-	1.63e-176	LTR	Gypsy	rnd-1_family-713	517	Cluster1108	65675940	65699993	24053	258	61.5
Canu_Virga4	scaffold_5	NW_021838687.1	65686159	65686542	+	383	Virgaviridae	Bombus-associated virus Vir1	4.74e-28	47.273	86	15	124	176	2511064	QAY29262.1	hypothetical protein	Hubei virga-like virus 12	5.07e-25	40.625	99	3	129	170	1923327	YP_009337823.1									65686622	65687135	-	1.63e-176	LTR	Gypsy	rnd-1_family-713	517	Cluster1108	65675940	65699993	24053	258	61.5
Canu_Rhabdo56	scaffold_5	NW_021838687.1	65696727	65697719	-	992	Rhabdoviridae	Merida-like virus KE-2017a	1.67e-88	51.495	91	257	556	2136	1969830	YP_009551692.1	large protein	Culex tritaeniorhynchus rhabdovirus	4.97e-84	47.176	91	252	552	2123	936308	YP_009094323.1	65695728	65696010	+	4.39e-114	LTR	Gypsy	rnd-1_family-493	1047	65698370	65698719	-	1.18e-127	LTR	Gypsy	rnd-1_family-378	861	Cluster1108	65675940	65699993	24053	258	61.5
Canu_ChuLike138	scaffold_5	NW_021838687.1	95535363	95537246	-	1883	Chuviridae-like	Chuvirus Mos8Chu0	0	40.735	98	5	625	665	1925502	API61888.1	glycoprotein	Wuhan Mosquito Virus 8	4.94e-112	31.457	96	1	599	653	1608133	YP_009177720.1	95534766	95535363	-	0	LTR		rnd-5_family-200	5156	95537422	95537859	-	0	LTR		rnd-5_family-200	5156
Canu_Un107	scaffold_51	NW_021838699.1	2067219	2069205	+	1986	Unclassified	Kaiowa virus	0	100	41	1	270	270	1795439	ANW72242.1	putative glycoprotein	Hubei chuvirus-like virus 3	4.91e-90	31.332	80	85	616	688	1922858	YP_009337090.1									2070038	2070205	-	2.6e-66	LINE	I	rnd-1_family-296	6267
Canu_ChuLike139	scaffold_51	NW_021838699.1	3119781	3121694	+	1913	Chuviridae-like	Chuvirus Mos8Chu0	0	40.735	97	5	625	665	1925502	API61888.1	glycoprotein	Wuhan Mosquito Virus 8	1.77e-111	31.457	94	1	599	653	1608133	YP_009177720.1	3118782	3119781	+	0	LTR		rnd-5_family-200	5156	3121695	3122291	+	0	LTR		rnd-5_family-200	5156
Canu_Un108	scaffold_513	NW_021838703.1	299632	301589	-	1957	Unclassified	Kaiowa virus	0	99.237	61	266	396	399	1795439	ASV45863.1	putative glycoprotein	Hubei chuvirus-like virus 3	6.56e-54	29.148	80	253	471	688	1922858	YP_009337090.1
Canu_ChuLike140	scaffold_523	NW_021838714.1	138528	140441	+	1913	Chuviridae-like	Chuvirus Mos8Chu0	0	40.735	97	5	625	665	1925502	API61888.1	glycoprotein	Wuhan Mosquito Virus 8	1.84e-111	31.457	94	1	599	653	1608133	YP_009177720.1	137529	138528	+	0	LTR		rnd-5_family-200	5156	140442	141037	+	0	LTR		rnd-5_family-200	5156
Canu_Un154	scaffold_525	NW_021838716.1	136944	137504	-	560	Unclassified	Culex mononega-like virus 2	1.52e-26	41.026	83	154	303	2079	2010272	ASA47322.1	RdRp	Culex mononega-like virus 2	2.25e-26	41.026	83	154	303	2079	2010272	YP_009388622.1	135946	136442	-	0	LINE	R1	rnd-3_family-22	4428	137636	138150	-	0	LTR	Gypsy	rnd-1_family-713	517
Canu_Un109	scaffold_54	NW_021838732.1	2567682	2569622	+	1940	Unclassified	Kaiowa virus	0	70.36	56	1	361	399	1795439	ASV45863.1	putative glycoprotein	Hubei chuvirus-like virus 3	5.54e-108	31.002	97	29	647	688	1922858	YP_009337090.1	2566832	2567086	+	3.18e-08	LTR		rnd-5_family-200	5156
Canu_ChuLike141	scaffold_54	NW_021838732.1	2748519	2750021	-	1502	Chuviridae-like	Guato virus	0	99.623	53	1	265	289	1795437	ANW72248.1	putative glycoprotein	Hubei chuvirus-like virus 3	4.8e-84	30.277	94	147	613	688	1922858	YP_009337090.1	2747520	2748289	-	0	DNA		rnd-5_family-202	1577	2750022	2750435	-	2.12e-162	SINE	tRNA	rnd-1_family-298	438
Canu_ChuLike142	scaffold_54	NW_021838732.1	2750447	2750851	-	404	Chuviridae-like	Chuvirus Mos8Chu0	1.41e-13	34.328	99	5	138	665	1925502	API61888.1	glycoprotein	Wuhan Mosquito Virus 8	4.18e-09	33.083	99	1	132	653	1608133	YP_009177720.1	2750006	2750435	-	4.38e-171	SINE	tRNA	rnd-1_family-298	438	2751192	2751851	-	7.45e-67	LTR		rnd-5_family-200	5156
Canu_ChuLike143	scaffold_551	NW_021838745.1	179861	181774	+	1913	Chuviridae-like	Chuvirus Mos8Chu0	4.89e-180	40.415	97	5	625	665	1925502	API61888.1	glycoprotein	Wuhan Mosquito Virus 8	1.28e-110	31.291	94	1	599	653	1608133	YP_009177720.1	178862	179861	+	0	LTR		rnd-5_family-200	5156	181775	182370	+	0	LTR		rnd-5_family-200	5156
Canu_ChuLike144	scaffold_553	NW_021838747.1	341456	343407	+	1951	Chuviridae-like	Guato virus	2e-141	98.86	42	1	284	289	1795437	ANW72248.1	glycoprotein	Wuchang Cockroach Virus 3	7e-77	27.24	94	6	625	675	1608099	YP_009666257.1	340457	341148	+	4.7e-82	LTR		rnd-5_family-200	5156	343577	344407	+	0	DNA		rnd-5_family-202	1577
Canu_Un110	scaffold_560	NW_021838755.1	187276	189127	-	1851	Unclassified	Kaiowa virus	9.67e-96	64.286	43	159	270	270	1795439	ANW72242.1	glycoprotein	Wuhan Mosquito Virus 8	9.24e-57	34.043	94	18	64	653	1608133	YP_009177720.1	186683	187276	-	0	LTR		rnd-5_family-200	5156	189128	190127	-	0	LTR		rnd-5_family-200	5156
Canu_Un111	scaffold_568	NW_021838763.1	218654	220600	-	1946	Unclassified	Kaiowa virus	1.8e-152	68.562	55	64	361	399	1795439	ASV45863.1	hypothetical protein	Dendrolimus punctatus cypovirus 22	3.62e-69	37.736	88	282	334	662	1577776	YP_009111331.1									221525	221579	+	7.97e-16	DNA	MULE-MuDR	rnd-6_family-2557	80
Canu_Rhabdo57	scaffold_568	NW_021838763.1	236540	237967	+	1427	Rhabdoviridae	Kotonkan virus	1.42e-20	31.429	85	119	153	426	318836	YP_006202618.1	N gene product	Kotonkan virus	9.71e-21	31.429	85	119	153	426	318836	YP_006202618.1	236151	236242	-	6.99e-23	DNA	hAT-hATm	rnd-1_family-497	649									Cluster1141	226885	254353	27468	309	38.05
Canu_ChuLike145	scaffold_568	NW_021838763.1	263878	264219	-	341	Chuviridae-like	Chuvirus Mos8Chu0	5.14e-51	68.807	96	504	612	665	1925502	API61888.1	putative glycoprotein	Hubei chuvirus-like virus 3	1.12e-14	30.612	86	524	621	688	1922858	YP_009337090.1
Canu_Phenui5	scaffold_568	NW_021838763.1	264406	265102	-	696	Phenuiviridae	Phasi Charoen-like phasivirus	1e-41	48	99	39	185	268	1980610	AIF71032.1	Nuclecapsid	Phasi Charoen-like phasivirus	1e-40	50	99	39	175	268	1980610	YP_009505333.1									265566	266226	-	2.97e-21	LTR		rnd-5_family-200	5156	Cluster1142	265069	269554	4485	73.9	39.9
Canu_ChuLike146	scaffold_568	NW_021838763.1	265103	266619	-	1516	Chuviridae-like	Chuvirus Mos8Chu0	6e-45	35.9	90	25	348	665	1925502	API61888.1	glycoprotein	Wuhan Mosquito Virus 8	5e-23	30.41	47	151	341	653	1608133	YP_009177720.1									266725	267094	-	2.96e-135	Unknown		rnd-1_family-363	840	Cluster1142	265069	269554	4485	73.9	39.9
Canu_ChuLike147	scaffold_573	NW_021838769.1	118637	120550	-	1913	Chuviridae-like	Chuvirus Mos8Chu0	5.56e-171	39.936	97	5	625	665	1925502	API61888.1	glycoprotein	Wuhan Mosquito Virus 8	1.45e-104	31.137	94	1	599	653	1608133	YP_009177720.1	117638	118637	+	0	LTR		rnd-5_family-200	5156	120551	121146	+	0	LTR		rnd-5_family-200	5156
Canu_Un112	scaffold_583	NW_021838780.1	46036	47903	+	1867	Unclassified	Kaiowa virus	1.26e-136	66.387	55	1	119	399	1795439	ASV45863.1	glycoprotein	Wuhan Mosquito Virus 8	9.07e-77	31.05	95	381	599	653	1608133	YP_009177720.1	45451	46036	-	0	LTR		rnd-5_family-200	5156	47904	48903	-	0	LTR		rnd-5_family-200	5156
Canu_ChuLike148	scaffold_59	NW_021838787.1	601419	603332	-	1913	Chuviridae-like	Chuvirus Mos8Chu0	0	40.735	97	5	625	665	1925502	API61888.1	glycoprotein	Wuhan Mosquito Virus 8	2.31e-111	31.457	94	1	599	653	1608133	YP_009177720.1	600821	601419	-	0	LTR		rnd-5_family-200	5156	603333	604332	-	0	LTR		rnd-5_family-200	5156
Canu_ChuLike149	scaffold_59	NW_021838787.1	638504	640417	-	1913	Chuviridae-like	Chuvirus Mos8Chu0	0	40.735	97	5	625	665	1925502	API61888.1	glycoprotein	Wuhan Mosquito Virus 8	2.31e-111	31.457	94	1	599	653	1608133	YP_009177720.1	637906	638504	-	0	LTR		rnd-5_family-200	5156	640418	641417	-	0	LTR		rnd-5_family-200	5156
Canu_Rhabdo58	scaffold_6	NW_021838798.1	2128475	2131059	+	2584	Rhabdoviridae	Merida-like virus KE-2017a	0	53.453	95	138	860	2136	1969830	YP_009551692.1	large protein	Culex tritaeniorhynchus rhabdovirus	0	50.614	97	133	863	2123	936308	YP_009094323.1	2127978	2128260	-	5.34e-132	Unknown		rnd-1_family-819	335	2131587	2132055	-	4.1e-165	LTR	Gypsy	rnd-1_family-630	613	Cluster1156	2127877	2133875	5998	403	27.5
Canu_Rhabdo59	scaffold_6	NW_021838798.1	14419219	14420976	-	1757	Rhabdoviridae	Merida-like virus KE-2017a	4.9e-156	45.75	94	61	612	2136	1969830	YP_009551692.1	large protein	Culex tritaeniorhynchus rhabdovirus	1.6e-149	45.504	94	57	608	2123	936308	YP_009094323.1	14418422	14418930	+	4.68e-177	LTR	Gypsy	rnd-1_family-713	517	14421135	14421643	-	4.68e-177	LTR	Gypsy	rnd-1_family-713	517	Cluster1170	14415226	14424853	9627	588	480
Canu_Un155	scaffold_6	NW_021838798.1	16018338	16020107	+	1769	Unclassified	Culex mononega-like virus 2	1.3e-132	41.056	98	21	598	2079	2010272	ASA47322.1	RdRp	Culex mononega-like virus 2	1.77e-132	41.056	98	21	598	2079	2010272	YP_009388622.1	16017446	16017697	+	5.35e-113	Unknown		rnd-1_family-649	526	16020722	16021103	+	2.13e-67	LTR	Gypsy	rnd-1_family-651	592
Canu_Rhabdo60	scaffold_6	NW_021838798.1	21999427	22001787	+	2360	Rhabdoviridae	Merida-like virus KE-2017a	0	47.94	92	5	731	2136	1969830	YP_009551692.1	large protein	Culex tritaeniorhynchus rhabdovirus	0	47.455	92	4	719	2123	936308	YP_009094323.1	21999030	21999411	-	9.02e-180	Unknown		rnd-1_family-725	1135	22001886	22002127	-	3.16e-103	LTR	Gypsy	rnd-1_family-630	613	Cluster1173	21985164	22009092	23928	946	5.82
Canu_Rhabdo61	scaffold_6	NW_021838798.1	22002134	22003764	-	1630	Rhabdoviridae	Benxi bat virus	7.56e-146	56.338	78	125	479	530	2010263	AQX45764.2	L polymerase protein	Cocal virus	5.45e-139	57.746	78	359	713	2108	50713	YP_009177651.1	22001886	22002127	-	3.16e-103	LTR	Gypsy	rnd-1_family-630	613	22003863	22004104	-	3.16e-103	LTR	Gypsy	rnd-1_family-630	613	Cluster1173	21985164	22009092	23928	946	5.82
Canu_Rhabdo62	scaffold_6	NW_021838798.1	22003994	22004851	+	857	Rhabdoviridae	Merida virus	5.33e-78	59.524	74	771	980	2136	1803034	YP_009552115.1	large protein	Culex tritaeniorhynchus rhabdovirus	1.74e-74	57.346	74	767	976	2123	936308	YP_009094323.1	22003863	22003993	-	6.12e-49	LTR	Gypsy	rnd-1_family-630	613									Cluster1173	21985164	22009092	23928	946	5.82
Canu_Un113	scaffold_6	NW_021838798.1	23342541	23344244	+	1703	Unclassified	Kaiowa virus	1.56e-179	66.957	61	1	345	399	1795439	ASV45863.1	glycoprotein	Wuhan Mosquito Virus 8	6.86e-103	31.993	96	58	599	653	1608133	YP_009177720.1	23341542	23342541	+	0	LTR		rnd-5_family-200	5156	23344379	23345048	-	0	DNA	CMC-Chapaev-3	rnd-6_family-16	671
Canu_Un114	scaffold_6	NW_021838798.1	29579022	29580938	-	1916	Unclassified	Kaiowa virus	0	70.231	54	1	346	399	1795439	ASV45863.1	glycoprotein	Wuhan Mosquito Virus 8	1.78e-108	31.09	97	1	619	653	1608133	YP_009177720.1
Canu_ChuLike150	scaffold_6	NW_021838798.1	38363348	38365215	+	1867	Chuviridae-like	Chuvirus Mos8Chu0	8.58e-143	41.346	99	418	625	665	1925502	API61888.1	glycoprotein	Wuhan Mosquito Virus 8	1.86e-88	33.253	97	1	410	653	1608133	YP_009177720.1	38362753	38363348	-	0	LTR		rnd-5_family-200	5156	38365423	38366215	-	0	LTR		rnd-5_family-200	5156
Canu_ChuLike151	scaffold_6	NW_021838798.1	46040127	46042040	+	1913	Chuviridae-like	Chuvirus Mos8Chu0	0	40.735	97	5	625	665	1925502	API61888.1	glycoprotein	Wuhan Mosquito Virus 8	2.31e-111	31.457	94	1	599	653	1608133	YP_009177720.1	46039531	46040127	-	0	LTR		rnd-5_family-200	5156	46042041	46043040	-	0	LTR		rnd-5_family-200	5156
Canu_Un156	scaffold_6	NW_021838798.1	48436579	48439056	+	2477	Unclassified	Culex mononega-like virus 2	8.84e-174	45.541	99	366	975	2079	2010272	ASA47322.1	RdRp	Culex mononega-like virus 2	3.2e-169	40.07	99	156	975	2079	2010272	YP_009388622.1	48435838	48436350	+	0	LTR	Gypsy	rnd-1_family-713	517	48439057	48439570	-	0	LTR	Gypsy	rnd-1_family-713	517	Cluster1183	48435703	48439927	4224	173	157
Canu_ChuLike152	scaffold_6	NW_021838798.1	53884664	53886577	+	1913	Chuviridae-like	Chuvirus Mos8Chu0	0	40.735	97	5	625	665	1925502	API61888.1	glycoprotein	Wuhan Mosquito Virus 8	1.84e-111	31.457	94	1	599	653	1608133	YP_009177720.1	53883665	53884664	+	0	LTR		rnd-5_family-200	5156	53886578	53887174	+	0	LTR		rnd-5_family-200	5156
Canu_ChuLike153	scaffold_6	NW_021838798.1	61886126	61888017	+	1891	Chuviridae-like	Chuvirus Mos8Chu0	7.12e-144	43.548	97	490	613	665	1925502	API61888.1	glycoprotein	Wuhan Mosquito Virus 8	5.66e-89	32.383	95	1	486	653	1608133	YP_009177720.1	61885127	61886126	+	0	LTR		rnd-5_family-200	5156	61888018	61888635	+	0	LTR		rnd-5_family-200	5156
Canu_ChuLike154	scaffold_6	NW_021838798.1	63169340	63171208	-	1868	Chuviridae-like	Chuvirus Mos8Chu0	1.13e-180	40.735	99	5	625	665	1925502	API61888.1	glycoprotein	Wuhan Mosquito Virus 8	1.96e-111	31.457	97	1	599	653	1608133	YP_009177720.1	63168341	63169340	+	0	LTR		rnd-5_family-200	5156	63171209	63171803	+	0	LTR		rnd-5_family-200	5156
Canu_Un115	scaffold_6	NW_021838798.1	71135056	71135877	-	821	Unclassified	Kaiowa virus	1.69e-81	51.064	99	79	345	399	1795439	ASV45863.1	hypothetical protein	Dendrolimus punctatus cypovirus 22	1.77e-31	43.038	85	353	431	662	1577776	YP_009111331.1
Canu_ChuLike155	scaffold_6	NW_021838798.1	71136502	71137255	-	753	Chuviridae-like	Chuvirus Mos8Chu0	5e-36	39.88	94	7	244	665	1925502	API61888.1	putative glycoprotein	Hubei chuvirus-like virus 3	1e-21	28.31	95	10	258	688	1922858	YP_009337090.1	71135539	71135859	-	9.7e-34	LTR		rnd-5_family-200	5156
Canu_Chu1	scaffold_6	NW_021838798.1	71183346	71183627	-	281	Chuviridae	Lishi Spider Virus 1	9.49e-13	34.409	99	25	117	659	1608057	AJG39049.1	putative glycoprotein	Imjin River virus 1	1.26e-08	38.71	99	22	114	653	1758883	YP_009182178.1									71183672	71183747	-	6.54e-17	LINE	LOA	rnd-5_family-31	1266
Canu_Un157	scaffold_6	NW_021838798.1	74528560	74529699	+	1139	Unclassified	Culex mononega-like virus 2	2.03e-80	63.462	95	341	392	638	2010272	YP_009388620.1	glycoprotein	Culex mononega-like virus 2	1.39e-80	63.462	95	341	392	638	2010272	YP_009388620.1	74528467	74528558	+	2e-23	LINE	R1	rnd-5_family-118	5469									Cluster1203	74510202	74569266	59064	12725	5470
Canu_Un158	scaffold_6	NW_021838798.1	74537679	74538421	+	742	Unclassified	Culex mononega-like virus 2	1.75e-51	51.923	89	341	495	638	2010272	YP_009388620.1	glycoprotein	Culex mononega-like virus 2	1.2e-51	51.923	89	341	495	638	2010272	YP_009388620.1																	Cluster1203	74510202	74569266	59064	12725	5470
Canu_Un159	scaffold_6	NW_021838798.1	74544023	74544481	+	458	Unclassified	Culex mononega-like virus 2	3.32e-24	37.415	96	97	243	638	2010272	YP_009388620.1	glycoprotein	Culex mononega-like virus 2	2.15e-24	37.415	96	97	243	638	2010272	YP_009388620.1	74543918	74544023	+	5.03e-31	LINE	R1	rnd-5_family-118	5469									Cluster1203	74510202	74569266	59064	12725	5470
Canu_Xinmo3	scaffold_6	NW_021838798.1	74544561	74544899	+	338	Xinmoviridae	Xincheng Mosquito Virus	6.59e-29	47.17	94	248	353	648	1608141	YP_009302386.1	glycoprotein	Xincheng Mosquito Virus	4.26e-29	47.17	94	248	353	648	1608141	YP_009302386.1	74543918	74544023	+	5.03e-31	LINE	R1	rnd-5_family-118	5469									Cluster1203	74510202	74569266	59064	12725	5470
Canu_Un160	scaffold_6	NW_021838798.1	74554441	74555073	+	632	Unclassified	Culex mononega-like virus 2	5.69e-45	45.685	88	269	456	638	2010272	YP_009388620.1	glycoprotein	Culex mononega-like virus 2	3.68e-45	45.685	88	269	456	638	2010272	YP_009388620.1	74553844	74553887	+	1.35e-06	LINE	R1	rnd-1_family-114	5541									Cluster1203	74510202	74569266	59064	12725	5470
Canu_Un161	scaffold_6	NW_021838798.1	74563374	74563880	+	506	Unclassified	Culex mononega-like virus 2	2.34e-42	56.911	99	341	462	638	2010272	YP_009388620.1	glycoprotein	Culex mononega-like virus 2	1.55e-42	56.911	99	341	462	638	2010272	YP_009388620.1	74562375	74562408	+	9.1e-09	LINE	R1	rnd-6_family-237	4809									Cluster1203	74510202	74569266	59064	12725	5470
Canu_ChuLike156	scaffold_6	NW_021838798.1	93012009	93013877	-	1868	Chuviridae-like	Chuvirus Mos8Chu0	0	40.735	99	5	625	665	1925502	API61888.1	glycoprotein	Wuhan Mosquito Virus 8	1.29e-111	31.457	97	1	599	653	1608133	YP_009177720.1	93011412	93012009	-	0	LTR		rnd-5_family-200	5156	93013878	93014877	-	0	LTR		rnd-5_family-200	5156
Canu_Un116	scaffold_608	NW_021838808.1	79193	81130	+	1937	Unclassified	Kaiowa virus	2.43e-102	63.813	56	1	257	399	1795439	ASV45863.1	putative glycoprotein	Hubei chuvirus-like virus 3	1.71e-72	37.5	95	29	44	688	1922858	YP_009337090.1
Canu_Un117	scaffold_608	NW_021838808.1	155425	157290	-	1865	Unclassified	Kaiowa virus	2.12e-170	71.037	53	1	328	399	1795439	ASV45863.1	glycoprotein	Wuhan Mosquito Virus 8	1.95e-102	31.209	98	1	609	653	1608133	YP_009177720.1									157885	158139	-	3.18e-08	LTR		rnd-5_family-200	5156
Canu_ChuLike157	scaffold_608	NW_021838808.1	263725	264433	+	708	Chuviridae-like	Chuvirus Mos8Chu0	2.66e-09	30	99	26	213	665	1925502	API61888.1	glycoprotein	Wuhan Mosquito Virus 8	5.55e-08	29.231	80	21	209	653	1608133	YP_009177720.1	262726	263333	+	4.4e-57	LTR		rnd-5_family-200	5156	264450	265432	+	1.1e-121	LTR		rnd-5_family-200	5156
Canu_Un118	scaffold_608	NW_021838808.1	264481	265432	+	951	Unclassified	Kaiowa virus	2.44e-72	68.033	97	8	129	399	1795439	ASV45863.1	glycoprotein	Wuhan Mosquito Virus 8	3.73e-38	40.351	91	275	388	653	1608133	YP_009177720.1	263721	264396	+	5.35e-94	LTR		rnd-5_family-200	5156	265791	266432	+	0	DNA		rnd-5_family-202	1577
Canu_Un119	scaffold_62	NW_021838821.1	3080864	3082711	+	1847	Unclassified	Kaiowa virus	0	98.571	57	1	350	399	1795439	ASV45863.1	putative glycoprotein	Hubei chuvirus-like virus 3	1.76e-105	31.405	98	13	616	688	1922858	YP_009337090.1
Canu_Un120	scaffold_67	NW_021838876.1	918417	920422	+	2005	Unclassified	Kaiowa virus	0	100	40	1	270	270	1795439	ANW72242.1	putative glycoprotein	Hubei chuvirus-like virus 3	1.1e-85	32.959	99	13	278	688	1922858	YP_009337090.1									921245	921365	+	2.14e-10	LTR	Gypsy	rnd-6_family-295	2817
Canu_Un121	scaffold_67	NW_021838876.1	2333536	2335471	-	1935	Unclassified	Kaiowa virus	1.18e-175	63.912	56	2	363	399	1795439	ASV45863.1	putative glycoprotein	Hubei chuvirus-like virus 3	3.63e-88	29.539	98	279	644	688	1922858	YP_009337090.1	2332537	2332755	-	6.52e-93	Unknown		rnd-1_family-1408	1353	2335785	2336471	-	1.18e-51	LTR		rnd-5_family-200	5156
Canu_Un162	scaffold_7	NW_021838909.1	21553348	21554697	-	1349	Unclassified	dsRNA virus environmental sample	0	60.417	99	395	874	934	1075826	AJT39589.1	hypothetical protein 2	Hubei toti-like virus 10	2.84e-170	53.32	99	350	831	989	1923298	YP_009336493.1	21552349	21552770	+	1.53e-151	LTR	Gypsy	rnd-1_family-651	592	21555298	21555697	+	6.09e-163	SINE	tRNA	rnd-1_family-298	438
Canu_Un163	scaffold_7	NW_021838909.1	22431472	22432822	-	1350	Unclassified	dsRNA virus environmental sample	2.61e-70	41.294	95	440	818	934	1075826	AJT39589.1	hypothetical protein 2	Hubei toti-like virus 10	1.37e-52	49.339	99	392	616	989	1923298	YP_009336493.1	22430486	22430918	+	9.65e-148	LTR	Gypsy	rnd-1_family-651	592	22432914	22433037	-	5.74e-24	LTR	Gypsy	rnd-1_family-1398	154
Canu_ChuLike158	scaffold_7	NW_021838909.1	35307287	35307637	-	350	Chuviridae-like	Guato virus	3.23e-67	99.138	99	46	161	185	1795437	ANW72251.1	putative glycoprotein	Hubei chuvirus-like virus 3	3.17e-15	34.444	77	524	613	688	1922858	YP_009337090.1	35306288	35307057	-	0	DNA		rnd-5_family-202	1577	35307841	35308615	-	1.26e-95	LTR		rnd-5_family-200	5156
Canu_ChuLike159	scaffold_7	NW_021838909.1	55117982	55119895	-	1913	Chuviridae-like	Chuvirus Mos8Chu0	0	40.735	97	5	625	665	1925502	API61888.1	glycoprotein	Wuhan Mosquito Virus 8	2.31e-111	31.457	94	1	599	653	1608133	YP_009177720.1	55117386	55117982	-	0	LTR		rnd-5_family-200	5156	55119896	55120895	-	0	LTR		rnd-5_family-200	5156
Canu_Un122	scaffold_7	NW_021838909.1	59509001	59510868	-	1867	Unclassified	Kaiowa virus	6.01e-178	66.957	55	1	345	399	1795439	ASV45863.1	glycoprotein	Wuhan Mosquito Virus 8	3.08e-90	38.636	91	5	92	653	1608133	YP_009177720.1	59508404	59509001	-	0	LTR		rnd-5_family-200	5156	59510869	59511868	-	0	LTR		rnd-5_family-200	5156
Canu_Un123	scaffold_7	NW_021838909.1	93665713	93667634	+	1921	Unclassified	Kaiowa virus	2.34e-167	72.787	48	42	346	399	1795439	ASV45863.1	putative glycoprotein	Hubei chuvirus-like virus 3	9.8e-86	29.934	95	318	621	688	1922858	YP_009337090.1
Canu_ChuLike160	scaffold_70	NW_021838910.1	345828	347741	+	1913	Chuviridae-like	Chuvirus Mos8Chu0	0	40.735	97	5	625	665	1925502	API61888.1	glycoprotein	Wuhan Mosquito Virus 8	1.84e-111	31.457	94	1	599	653	1608133	YP_009177720.1	344829	345828	+	0	LTR		rnd-5_family-200	5156	347742	348338	+	0	LTR		rnd-5_family-200	5156
Canu_Chu2	scaffold_75	NW_021838965.1	690133	690501	+	368	Chuviridae	Lishi Spider Virus 1	2.43e-12	34.579	87	11	117	659	1608057	AJG39049.1	glycoprotein	Wuhan Mosquito Virus 8	4.46e-11	33.636	90	5	114	653	1608133	YP_009177720.1	689134	689789	+	0	LTR		rnd-5_family-200	5156	690630	691300	+	0	LTR		rnd-5_family-200	5156
Canu_Un124	scaffold_76	NW_021838976.1	2176321	2178168	-	1847	Unclassified	Kaiowa virus	0	98.889	44	1	270	270	1795439	ANW72242.1	putative glycoprotein	Hubei chuvirus-like virus 3	1.15e-103	31.074	98	13	616	688	1922858	YP_009337090.1
Canu_ChuLike161	scaffold_78	NW_021838998.1	755721	757589	-	1868	Chuviridae-like	Chuvirus Mos8Chu0	0	40.735	99	5	625	665	1925502	API61888.1	glycoprotein	Wuhan Mosquito Virus 8	1.29e-111	31.457	97	1	599	653	1608133	YP_009177720.1	755124	755721	-	0	LTR		rnd-5_family-200	5156	757590	758589	-	0	LTR		rnd-5_family-200	5156
Canu_ChuLike162	scaffold_8	NW_021839020.1	8400661	8402574	+	1913	Chuviridae-like	Chuvirus Mos8Chu0	0	40.735	97	5	625	665	1925502	API61888.1	glycoprotein	Wuhan Mosquito Virus 8	1.84e-111	31.457	94	1	599	653	1608133	YP_009177720.1	8399662	8400661	+	0	LTR		rnd-5_family-200	5156	8402575	8403172	+	0	LTR		rnd-5_family-200	5156
Canu_Un164	scaffold_8	NW_021839020.1	19866072	19866296	-	224	Unclassified	Cumbaru virus	5.04e-20	66.667	76	97	153	157	2027351	ASV45869.1	putative glycoprotein	Hubei chuvirus-like virus 3	3.63e-12	39.189	99	556	629	688	1922858	YP_009337090.1	19865480	19866072	-	0	LTR		rnd-5_family-200	5156	19866297	19867296	-	0	LTR		rnd-5_family-200	5156
Canu_ChuLike163	scaffold_8	NW_021839020.1	33914677	33916590	+	1913	Chuviridae-like	Chuvirus Mos8Chu0	2.52e-180	40.735	97	5	625	665	1925502	API61888.1	glycoprotein	Wuhan Mosquito Virus 8	2.19e-111	31.457	94	1	599	653	1608133	YP_009177720.1	33913678	33914677	+	0	LTR		rnd-5_family-200	5156	33916591	33917186	+	0	LTR		rnd-5_family-200	5156
Canu_Un125	scaffold_8	NW_021839020.1	44763302	44765169	-	1867	Unclassified	Kaiowa virus	8.04e-161	68.81	50	35	345	399	1795439	ASV45863.1	glycoprotein	Wuhan Mosquito Virus 8	3.92e-89	34	97	300	599	653	1608133	YP_009177720.1	44762705	44763302	-	0	LTR		rnd-5_family-200	5156	44765170	44766169	-	0	LTR		rnd-5_family-200	5156
Canu_ChuLike164	scaffold_8	NW_021839020.1	52375134	52376237	+	1103	Chuviridae-like	Chuvirus Mos8Chu0	6.97e-70	39.205	95	19	370	665	1925502	API61888.1	putative glycoprotein	Hubei chuvirus-like virus 3	1.27e-44	30.471	98	13	372	688	1922858	YP_009337090.1
Canu_Un126	scaffold_8	NW_021839020.1	52382068	52382979	+	911	Unclassified	Kaiowa virus	0	93.443	98	93	397	399	1795439	ASV45863.1	putative glycoprotein	Hubei chuvirus-like virus 3	1.93e-47	31.818	87	366	628	688	1922858	YP_009337090.1									52383815	52383979	-	2.78e-72	Unknown		rnd-1_family-1224	433
Canu_Rhabdo63	scaffold_8	NW_021839020.1	57318879	57320793	+	1914	Rhabdoviridae	Merida-like virus KE-2017a	1.07e-171	64.744	94	576	731	2136	1969830	YP_009551692.1	RNA-dependent RNA polymerase	Piry virus	4.69e-162	65.541	93	558	705	2095	11274	YP_009505536.1	57317881	57318348	-	0	Unknown		rnd-1_family-828	914	57320944	57321185	-	1.64e-100	LTR	Gypsy	rnd-1_family-630	613	Cluster1348	57305052	57324539	19487	617	31.1
Canu_Rhabdo64	scaffold_8	NW_021839020.1	57321075	57321944	-	869	Rhabdoviridae	Merida virus	4.92e-79	59.524	72	771	980	2136	1803034	YP_009552115.1	large protein	Culex tritaeniorhynchus rhabdovirus	1.66e-75	57.346	72	767	976	2123	936308	YP_009094323.1	57320944	57321074	-	3.17e-46	LTR	Gypsy	rnd-1_family-630	613									Cluster1348	57305052	57324539	19487	617	31.1
Canu_Rhabdo65	scaffold_8	NW_021839020.1	67894708	67896789	-	2081	Rhabdoviridae	Merida-like virus KE-2017a	0	46.979	95	5	665	2136	1969830	YP_009551692.1	large protein	Culex tritaeniorhynchus rhabdovirus	0	45.718	99	7	678	2123	936308	YP_009094323.1	67894047	67894708	-	0	Unknown		rnd-1_family-828	914	67896873	67897787	-	0	Unknown		rnd-1_family-828	914	Cluster1351	67890201	67899211	9010	543	108
Canu_Rhabdo66	scaffold_8	NW_021839020.1	68976937	68979018	-	2081	Rhabdoviridae	Merida-like virus KE-2017a	0	46.828	95	5	665	2136	1969830	YP_009551692.1	large protein	Culex tritaeniorhynchus rhabdovirus	0	45.573	99	7	678	2123	936308	YP_009094323.1	68976051	68976937	-	0	Unknown		rnd-1_family-828	914	68979102	68980015	-	0	Unknown		rnd-1_family-828	914	Cluster1353	68974999	68979085	4086	441	11.4
Canu_ChuLike165	scaffold_8	NW_021839020.1	70417365	70417874	+	509	Chuviridae-like	Chuvirus Mos8Chu0	3.81e-26	39.881	96	5	168	665	1925502	API61888.1	glycoprotein	Wuhan Mosquito Virus 8	2.26e-15	30.818	93	1	158	653	1608133	YP_009177720.1	70416366	70417365	+	0	LTR		rnd-5_family-200	5156	70417875	70418539	+	0	LTR		rnd-5_family-200	5156
Canu_ChuLike166	scaffold_8	NW_021839020.1	79614457	79616370	-	1913	Chuviridae-like	Chuvirus Mos8Chu0	0	40.735	97	5	625	665	1925502	API61888.1	glycoprotein	Wuhan Mosquito Virus 8	2.31e-111	31.457	94	1	599	653	1608133	YP_009177720.1	79613860	79614457	-	0	LTR		rnd-5_family-200	5156	79616371	79617370	-	0	LTR		rnd-5_family-200	5156
Canu_ChuLike167	scaffold_8	NW_021839020.1	79721637	79723589	+	1952	Chuviridae-like	Chuvirus Mos8Chu0	0	41.779	92	24	619	665	1925502	API61888.1	putative glycoprotein	Hubei chuvirus-like virus 3	8.47e-105	27.932	99	12	654	688	1922858	YP_009337090.1
Canu_ChuLike168	scaffold_84	NW_021839065.1	2423522	2425504	+	1982	Chuviridae-like	Guato virus	0	100	41	3	276	281	1795437	ANW72245.1	putative glycoprotein	Hubei chuvirus-like virus 3	1.32e-105	30.807	91	15	613	688	1922858	YP_009337090.1	2422524	2423218	+	2.43e-79	LTR		rnd-5_family-200	5156	2425680	2426504	+	0	DNA		rnd-5_family-202	1577
Canu_ChuLike169	scaffold_85	NW_021839076.1	113214	115082	+	1868	Chuviridae-like	Chuvirus Mos8Chu0	4.87e-140	49.505	97	309	409	665	1925502	API61888.1	putative glycoprotein	Hubei chuvirus-like virus 3	2.63e-83	36.364	94	316	414	688	1922858	YP_009337090.1	112215	113214	+	0	LTR		rnd-5_family-200	5156	115083	115679	+	0	LTR		rnd-5_family-200	5156
Canu_ChuLike170	scaffold_9	NW_021839130.1	10961602	10962264	+	662	Chuviridae-like	Chuvirus Mos8Chu0	2.09e-32	40.887	92	19	221	665	1925502	API61888.1	putative glycoprotein	Hubei chuvirus-like virus 3	4.21e-27	35.047	97	13	226	688	1922858	YP_009337090.1									10962425	10963261	+	2.78e-72	LTR		rnd-5_family-200	5156
Canu_Un127	scaffold_9	NW_021839130.1	10962269	10963607	+	1338	Unclassified	Kaiowa virus	0	98.559	89	53	399	399	1795439	ASV45863.1	putative glycoprotein	Hubei chuvirus-like virus 3	1.33e-52	28.652	77	329	684	688	1922858	YP_009337090.1	10961647	10962258	+	2e-42	LTR		rnd-5_family-200	5156
Canu_Un128	scaffold_9	NW_021839130.1	18821298	18823289	-	1991	Unclassified	Kaiowa virus	0	75.072	53	1	349	399	1795439	ASV45863.1	glycoprotein	Wuhan Mosquito Virus 8	4.77e-110	32.131	92	1	607	653	1608133	YP_009177720.1
Canu_ChuLike171	scaffold_9	NW_021839130.1	38552309	38552827	+	518	Chuviridae-like	Chuvirus Mos8Chu0	9.55e-26	37.572	99	6	178	665	1925502	API61888.1	putative glycoprotein	Hubei chuvirus-like virus 3	5.19e-12	31.176	97	16	179	688	1922858	YP_009337090.1	38551310	38551968	+	6.11e-68	LTR		rnd-5_family-200	5156	38552945	38553414	+	3.62e-20	Unknown		rnd-5_family-103	1393
Canu_Rhabdo67	scaffold_9	NW_021839130.1	50245789	50246727	-	938	Rhabdoviridae	Berrimah virus	5.27e-28	27.465	91	186	426	431	318834	YP_009094129.1	nucleoprotein N	Berrimah virus	3.41e-28	27.465	91	186	426	431	318834	YP_009094129.1																	Cluster1411	50165234	50274988	109754	1139.67	378.567
Canu_Xinmo4	scaffold_9	NW_021839130.1	50813809	50814106	-	297	Xinmoviridae	Aedes aegypti anphevirus	9.98e-18	61.29	91	327	357	647	2059675	AWK27461.1	glycoprotein	Culex mononega-like virus 2	2.51e-17	62.069	90	307	335	638	2010272	YP_009388620.1	50813583	50813659	-	2.14e-10	LINE	LOA	rnd-1_family-1251	1043									Cluster1412	50781082	50889981	108899	2195	745
Canu_Un129	scaffold_9	NW_021839130.1	52004956	52006822	+	1866	Unclassified	Kaiowa virus	2e-122	70.54	55	1	345	399	1795439	ASV45863.1	putative glycoprotein	Hubei chuvirus-like virus 3	2e-64	31.63	81	81	622	688	1922858	YP_009337090.1	52003957	52004956	+	0	LTR		rnd-5_family-200	5156	52006823	52007349	+	0	LTR		rnd-5_family-200	5156
Canu_ChuLike172	scaffold_9	NW_021839130.1	64939769	64941742	+	1973	Chuviridae-like	Guato virus	0	100	42	3	276	281	1795437	ANW72245.1	putative glycoprotein	Hubei chuvirus-like virus 3	1.14e-105	30.807	92	15	613	688	1922858	YP_009337090.1	64938770	64939455	+	7.95e-73	LTR		rnd-5_family-200	5156	64941918	64942742	+	0	DNA		rnd-5_family-202	1577
Canu_ChuLike173	scaffold_9	NW_021839130.1	65186690	65187871	-	1181	Chuviridae-like	Guato virus	5.87e-101	62.369	72	3	272	289	1795437	ANW72248.1	hypothetical protein	Dendrolimus punctatus cypovirus 22	2e-28	35.556	84	282	326	662	1577776	YP_009111331.1	65185691	65186522	-	0	DNA		rnd-5_family-202	1577	65187917	65188615	-	7.44e-86	LTR		rnd-5_family-200	5156
Canu_ChuLike174	scaffold_9	NW_021839130.1	65188023	65188643	-	620	Chuviridae-like	Chuvirus Mos8Chu0	2.41e-16	29.577	99	5	212	665	1925502	API61888.1	putative glycoprotein	Hubei chuvirus-like virus 3	9e-11	28.507	99	15	218	688	1922858	YP_009337090.1	65187102	65188023	-	6.96e-118	LTR		rnd-5_family-200	5156	65188903	65189643	+	0	DNA	CMC-Chapaev	rnd-1_family-438	900
Canu_Xinmo5	scaffold_91	NW_021839142.1	1249325	1249873	+	548	Xinmoviridae	Aedes anphevirus	4.16e-86	68.333	99	185	364	442	2230910	AWW13459.1	hypothetical protein	Culex mononega-like virus 2	6.32e-09	26.891	65	305	423	508	2010272	YP_009388617.1	1248862	1248902	+	7.47e-10	LINE	R1	rnd-1_family-520	83	1250048	1250873	-	0	Unknown		rnd-1_family-1113	1254
Canu_Xinmo6	scaffold_91	NW_021839142.1	1251297	1251428	+	131	Xinmoviridae	Aedes aegypti anphevirus	1.77e-11	69.767	98	365	407	442	2059675	AWK27459.1	NA	NA	.	.	.	.	.	.	.	.	1250298	1251297	-	0	Unknown		rnd-1_family-1113	1254	1251770	1252269	-	0	RC	Helitron	rnd-6_family-558	994
Canu_Un130	scaffold_912	NW_021839145.1	42526	44013	-	1487	Unclassified	Kaiowa virus	1.39e-152	96.19	70	201	305	399	1795439	ASV45863.1	putative glycoprotein	Hubei chuvirus-like virus 3	2.9e-55	52.381	92	575	616	688	1922858	YP_009337090.1
Canu_Un131	scaffold_931	NW_021839166.1	75280	77127	+	1847	Unclassified	Kaiowa virus	0	98.857	57	1	350	399	1795439	ASV45863.1	putative glycoprotein	Hubei chuvirus-like virus 3	4.52e-105	31.24	98	13	616	688	1922858	YP_009337090.1
Canu_Un132	scaffold_96	NW_021839197.1	1455488	1455709	-	221	Unclassified	Hubei virga-like virus 21	1.31e-12	43.836	99	14	86	170	1923336	YP_009337662.1	hypothetical protein	Hubei virga-like virus 21	8.49e-13	43.836	99	14	86	170	1923336	YP_009337662.1	1454920	1455166	+	5.72e-81	LTR	Gypsy	rnd-1_family-630	613	1455801	1456626	-	0	Unknown		rnd-1_family-902	937
Canu_Un133	scaffold_98	NW_021839219.1	1516325	1516828	-	503	Unclassified	Hubei virga-like virus 12	4.17e-43	43.452	99	1	168	170	1923327	YP_009337823.1	hypothetical protein	Hubei virga-like virus 12	2.7e-43	43.452	99	1	168	170	1923327	YP_009337823.1	1515527	1516036	+	0	LTR	Gypsy	rnd-1_family-713	517	1517016	1517824	+	0	LTR	Gypsy	rnd-1_family-452	1214	Cluster1440	1505205	1523809	18604	702	667
