# Supplementary material for: Improved reference genome of the arboviral vector Aedes albopictus
Source: Genome Biol. 2020 Aug 26;21:215. doi: 10.1186/s13059-020-02141-w (PMC7448346; doi:10.1186/s13059-020-02141-w)
Supplement: Supplementary file 7 — Additional file 7: Database of piRNA clusters in the Aedes albopictus genome (AalbF2). [file 13059_2020_2141_MOESM7_ESM.xlsx]

## Sheet: Blad1
				coordinates precursor
#	miRNA name	scaffold	scaffold ID	start	end	strand	miRDeep2 score	total read count	mature read count	loop read count	star read count	consensus mature sequence	consensus star sequence	consensus precursor sequence
1	aal-miR-281	scaffold 2	NW_021838153.1	5399171	5399229	+	299279.3	587019	547214	0	39805	aagagagcuauccgucgacagu	ugucauggaauugcucucuuu	aagagagcuauccgucgacaguagggauaugauucacugucauggaauugcucucuuu
2	aal-miR-1	scaffold 2	NW_021838153.1	164240655	164240716	-	265929.7	521605	521539	1	65	uggaauguaaagaaguauggag	ccaugcuuccuugcauucaaua	ccaugcuuccuugcauucaauagugauuuugaaaccguauggaauguaaagaaguauggag
3	aal-miR-276a-1	scaffold 2	NW_021838153.1	40221212	40221274	-	234428.5	459816	454876	1	4939	uaggaacuucauaccgugcucu	agcgagguauagaguuccuacg	agcgagguauagaguuccuacguugcgugugcgaaauugguaggaacuucauaccgugcucu
	aal-miR-276a-2	scaffold 2	NW_021838153.1	41228527	41228589	-	234428.5	459816	454876	1	4939	uaggaacuucauaccgugcucu	agcgagguauagaguuccuacg	agcgagguauagaguuccuacguugcgugugcgaaauugguaggaacuucauaccgugcucu
4	aal-miR-276b-1	scaffold 2	NW_021838153.1	40584251	40584316	-	233633.1	458256	454883	5	3368	uaggaacuucauaccgugcucu	agcgagguauagaguuccua	agcgagguauagaguuccuauguguucgcguugagauauuccauaggaacuucauaccgugcucu
	aal-miR-276b-2	scaffold 1	NW_021837045.1	100711811	100711876	+	233633.1	458256	454883	5	3368	uaggaacuucauaccgugcucu	agcgagguauagaguuccua	agcgagguauagaguuccuauguguucgcguugagauauuccauaggaacuucauaccgugcucu
	aal-miR-276b-3	scaffold 2	NW_021838153.1	41534907	41534972	-	233633.1	458256	454883	5	3368	uaggaacuucauaccgugcucu	agcgagguauagaguuccua	agcgagguauagaguuccuauguguucgcguugagauauuccauaggaacuucauaccgugcucu
	aal-miR-276b-4	scaffold 1076	NW_021837130.1	74680	74745	+	233633.1	458256	454883	5	3368	uaggaacuucauaccgugcucu	agcgagguauagaguuccua	agcgagguauagaguuccuauguguucgcguugagauauuccauaggaacuucauaccgugcucu
5	aal-miR-989-1	scaffold 3	NW_021838465.1	80893832	80893897	-	228414.8	448021	440061	5	7955	ugugaugugacguagugguac	cgccgcuaccucgcuuucacuug	cgccgcuaccucgcuuucacuugguaccaaauugccauaauccaugugaugugacguagugguac
	aal-miR-989-2	scaffold 3	NW_021838465.1	80332527	80332592	-	228412.2	448016	440061	0	7955	ugugaugugacguagugguac	cgccgcuaccucgcuuucacuug	cgccgcuaccucgcuuucacuugguaccaaauuaccauaauccaugugaugugacguagugguac
6	aal-miR-184-1	scaffold 2	NW_021838153.1	135892663	135892724	+	146252.8	286864	286748	0	116	uggacggagaacugauaagggc	ccuuaucauucuuucgccccgu	ccuuaucauucuuucgccccguguacuauuguuugcgacuggacggagaacugauaagggc
	aal-miR-184-2	scaffold 2	NW_021838153.1	129205103	129205164	-	146252.8	286864	286748	0	116	uggacggagaacugauaagggc	ccuuaucauucuuucgccccgu	ccuuaucauucuuucgccccguguacuauuguuugcgacuggacggagaacugauaagggc
7	aal-miR-100-1	scaffold 5	NW_021838687.1	29388045	29388107	+	91388.2	179249	174708	0	4541	aacccguagauccgaacuugug	caagaacggauguaugggauuc	aacccguagauccgaacuugugcugccguuucacauguuacaagaacggauguaugggauuc
	aal-miR-100-2	scaffold 5	NW_021838687.1	29544829	29544891	-	91388.2	179249	174708	0	4541	aacccguagauccgaacuugug	caagaacggauguaugggauuc	aacccguagauccgaacuugugcugccguuucacauguuacaagaacggauguaugggauuc
8	aal-miR-998-1	scaffold 1	NW_021837045.1	92981195	92981258	-	73780.7	144712	144653	37	22	uagcaccaugagauucagcuc	acugaacucucgugggucugca	acugaacucucgugggucugcaguugauguuacgaaagcuuguagcaccaugagauucagcuc
	aal-miR-998-2	scaffold 1	NW_021837045.1	93080986	93081049	+	73780.6	144712	144653	37	22	uagcaccaugagauucagcuc	acugaacucucgugggucugca	acugaacucucgugggucugcaguugauguuacgaaagcuuguagcaccaugagauucagcuc
9	aal-miR-2945-1	scaffold 5	NW_021838687.1	29743056	29743119	-	68190.2	133747	133533	0	214	ugacuagaggcagacucguuu	agcggguccguuucuagugucaug	agcggguccguuucuagugucaugugcuacuuucaaauaccaugacuagaggcagacucguuu
	aal-miR-2945-2	scaffold 5	NW_021838687.1	29198882	29198947	+	68190.2	133747	133533	0	214	ugacuagaggcagacucguuu	agcggguccguuucuagugucaug	agcggguccguuucuagugucaugugcuacuuuucaaauauccaugacuagaggcagacucguuu
10	aal-let-7-1	scaffold 5	NW_021838687.1	29404989	29405052	+	66137.6	129721	129601	0	120	ugagguaguugguuguauagu	cuaugcaaucugcuagcuugac	ugagguaguugguuguauaguaguguauaauccaauaucuacuaugcaaucugcuagcuugac
	aal-let-7-2	scaffold 5	NW_021838687.1	29528076	29528139	-	66137.6	129721	129601	0	120	ugagguaguugguuguauagu	cuaugcaaucugcuagcuugac	ugagguaguugguuguauaguaguguauaauccaauaucuacuaugcaaucugcuagcuugac
11	aal-miR-308-1	scaffold 404	NW_021838582.1	534778	534839	+	61382.5	120394	120193	1	200	cgcgguauauucuuguggcuug	aaucacaggaguauacugug	cgcgguauauucuuguggcuugaugcauuugaaaaaucucaaaucacaggaguauacugug
	aal-miR-308-2	scaffold 3	NW_021838465.1	130977250	130977311	-	61382.5	120394	120193	1	200	cgcgguauauucuuguggcuug	aaucacaggaguauacugug	cgcgguauauucuuguggcuugaugcauuugaaaaaucucaaaucacaggaguauacugug
12	aal-miR-13-1	scaffold 4	NW_021838576.1	38273535	38273598	-	56345.4	110514	109214	1	1299	uaucacagccauuuugacgagu	ucguaaaaaugguugugcugug	ucguaaaaaugguugugcuguguugauaccuucgauauucauaucacagccauuuugacgagu
	aal-miR-13-2	scaffold 4	NW_021838576.1	39236860	39236923	+	56345.4	110514	109214	1	1299	uaucacagccauuuugacgagu	ucguaaaaaugguugugcugug	ucguaaaaaugguugugcuguguugauaccuucgauauucauaucacagccauuuugacgagu
	aal-miR-13-3	scaffold 736	NW_021838950.1	98256	98319	+	56344.9	110513	109214	0	1299	uaucacagccauuuugacgagu	ucguaaaaaugguugugcugug	ucguaaaaaugguugugcuguguugauacuuucgauauucauaucacagccauuuugacgagu
13	aal-miR-252-1	scaffold 16	NW_021837711.1	8406933	8406988	-	55219.1	108306	107367	0	939	cuaaguacuagugccgcaggag	cugcugcccaagugcuuaucg	cuaaguacuagugccgcaggagagauuugaaccccugcugcccaagugcuuaucg
	aal-miR-252-2	scaffold 108	NW_021837134.1	1357025	1357080	+	55218.9	108306	107367	0	939	cuaaguacuagugccgcaggag	cugcugcccaagugcuuaucg	cuaaguacuagugccgcaggagagauuugaaccccugcugcccaagugcuuaucg
14	aal-bantam	scaffold 12	NW_021837267.1	34049721	34049786	+	49907	97889	96570	0	1319	ugagaucauuuugaaagcugauu	ccgguuuucauuuucgaucugacu	ccgguuuucauuuucgaucugacuuauuugauuuaacaagagugagaucauuuugaaagcugauu
15	aal-miR-124-1	scaffold 541	NW_021838734.1	31861	31922	-	41721.1	81830	81751	0	79	uaaggcacgcggugaaugcca	gguauccacugccggccuauaug	gguauccacugccggccuauauguccuauuucgguacucauaaggcacgcggugaaugcca
	aal-miR-124-2	scaffold 5	NW_021838687.1	41046165	41046226	+	41721.1	81830	81751	0	79	uaaggcacgcggugaaugcca	gguauccacugccggccuauaug	gguauccacugccggccuauauguccuauuucgguacucauaaggcacgcggugaaugcca
	aal-miR-124-3	scaffold 255	NW_021838416.1	564993	565054	+	41720.9	81830	81751	0	79	uaaggcacgcggugaaugcca	gguauccacugccggccuauaug	gguauccacugccggccuauaugucauauuucgguacucauaaggcacgcggugaaugcca
	aal-miR-124-4	scaffold 255	NW_021838416.1	476306	476367	-	41720.9	81830	81751	0	79	uaaggcacgcggugaaugcca	gguauccacugccggccuauaug	gguauccacugccggccuauaugucauauuucgguacucauaaggcacgcggugaaugcca
16	aal-miR-1891-1	scaffold 5	NW_021838687.1	60293496	60293553	-	35646.3	69915	69708	0	207	ugaggaguuaauuugcguguuu	acacguccauuaacucuggua	ugaggaguuaauuugcguguuuuuguauuugauuaaacacguccauuaacucuggua
	aal-miR-1891-2	scaffold 5	NW_021838687.1	60423126	60423183	+	35646.2	69915	69708	0	207	ugaggaguuaauuugcguguuu	acacguccauuaacucuggua	ugaggaguuaauuugcguguuuuuguauuugauuaaacacguccauuaacucuggua
17	aal-miR-932	scaffold 53	NW_021838721.1	1072297	1072357	-	34431.5	67531	65727	0	1804	ucaauuccguagugcauugcagu	ugcaagcaauguggaagugaag	ucaauuccguagugcauugcaguguguuuuugacgaacugcaagcaauguggaagugaag
18	aal-miR-11-1	scaffold 1	NW_021837045.1	93078789	93078853	+	31779.2	62328	56917	0	5411	caucacagucugaguucuugcu	caagaacuccggcugugaccugug	caagaacuccggcugugaccuguguacacguuauccaaaucacaucacagucugaguucuugcu
	aal-miR-11-2	scaffold 1	NW_021837045.1	92985643	92985707	-	31779.2	62328	56917	0	5411	caucacagucugaguucuugcu	caagaacuccggcugugaccugug	caagaacuccggcugugaccuguguacacguuauccaaaccacaucacagucugaguucuugcu
19	aal-miR-285	scaffold 13	NW_021837378.1	52502077	52502139	-	29877.3	58603	58410	0	193	uagcaccauucgaaaucaguac	acuggcuuccaaaggugaguaga	acuggcuuccaaaggugaguagauugcauucgauacgcucuagcaccauucgaaaucaguac
20	aal-miR-970	scaffold 64	NW_021838843.1	2321045	2321106	-	26554	52080	52067	0	13	ucauaagacacacgcggcuau	agcuugcguuugucuuagcuggua	agcuugcguuugucuuagcugguauugaauaugauagguaucauaagacacacgcggcuau
21	aal-miR-14-1	scaffold 148	NW_021837578.1	1277454	1277519	+	23604	46294	45736	25	533	ucagucuuuuucucucuccuau	gggagcgagauuaaggcuug	gggagcgagauuaaggcuugcuggucauuuauuacacgcgaagucagucuuuuucucucuccuau
	aal-miR-14-2	scaffold 226	NW_021838384.1	46753	46818	+	23604	46294	45736	25	533	ucagucuuuuucucucuccuau	gggagcgagauuaaggcuug	gggagcgagauuaaggcuugcuggucauuuauuacacgcgaagucagucuuuuucucucuccuau
	aal-miR-14-3	scaffold 148	NW_021837578.1	245152	245217	-	23592.3	46271	45736	2	533	ucagucuuuuucucucuccuau	gggagcgagauuaaggcuug	gggagcgagauuaaggcuugcuggucauuuauuauacgcgaagucagucuuuuucucucuccuau
22	aal-miR-71-1	scaffold 4	NW_021838576.1	38274132	38274199	-	23136.3	45375	31948	2	13425	ucucacuaccuugucuuucaug	agaaagacauggguagugagau	agaaagacauggguagugagauaguuucacccuauugcacugggaucucacuaccuugucuuucaug
	aal-miR-71-2	scaffold 4	NW_021838576.1	39236258	39236325	+	23136.3	45375	31948	2	13425	ucucacuaccuugucuuucaug	agaaagacauggguagugagau	agaaagacauggguagugagauaguuucacccuauugcacugggaucucacuaccuugucuuucaug
	aal-miR-71-3	scaffold 736	NW_021838950.1	97659	97726	+	23136.2	45375	31948	2	13425	ucucacuaccuugucuuucaug	agaaagacauggguagugagau	agaaagacauggguagugagauaguuucacccuauugcacugggaucucacuaccuugucuuucaug
23	aal-miR-9c	scaffold 8	NW_021839020.1	67196682	67196754	+	19306.4	37864	31829	0	6035	ucuuugguauucuagcuguag	uaaagcuuuaguaccagagguc	ucuuugguauucuagcuguagaauguugagcuugcgaauaugguaucuucuaaagcuuuaguaccagagguc
24	aal-miR-9b	scaffold 8	NW_021839020.1	67218533	67218598	+	15688.2	30766	30652	1	113	ucuuuggugauuuuagcuguaug	uauagcuuuaucaccaaaaacc	ucuuuggugauuuuagcuguaugcugauacguuucugauugcauauagcuuuaucaccaaaaacc
25	aal-miR-277	scaffold 436	NW_021838617.1	462459	462530	+	15304.1	30013	29666	11	336	uaaaugcacuaucugguacgaca	cgugucagaagugcauuuaca	cgugucagaagugcauuuacauagguauuucccguuuagcaguauuuguaaaugcacuaucugguacgaca
26	aal-miR-9a	scaffold 30	NW_021838466.1	402379	402441	+	15026.5	29470	27244	0	2226	ucuuugguuaucuagcuguau	uaaagcuagcauaccgaaguua	ucuuugguuaucuagcuguaugagugaauuuagaacaucauaaagcuagcauaccgaaguua
27	aal-miR-2941-1	scaffold 1234	NW_021837306.1	65616	65678	+	14204.3	27859	27852	0	7	uaguacggcuagaacuccacgg	cgugguguuuagacguauuaca	cgugguguuuagacguauuacaugaccuuuugugcaacuguaguacggcuagaacuccacgg
	aal-miR-2941-2	scaffold 81	NW_021839032.1	1871793	1871857	-	14204	27859	27852	0	7	uaguacggcuagaacuccacgg	cgugguguuuagacguauuaca	cgugguguuuagacguauuacaugaccuuuugugcauaacuguaguacggcuagaacuccacgg
28	aal-miR-10	scaffold 13	NW_021837378.1	46582270	46582333	+	13626.6	26723	22237	0	4486	acccuguagauccgaauuuguu	caaauucgguucuagagagguuu	acccuguagauccgaauuuguuugaauauuuaacaagcgacaaauucgguucuagagagguuu
29	aal-miR-1000-1	scaffold 1	NW_021837045.1	90530808	90530865	-	13483.9	26444	26395	0	49	auauuguccugucacagcagu	cuguuguuucgggacauuuaca	auauuguccugucacagcaguacuguuacuaauuacuguuguuucgggacauuuaca
	aal-miR-1000-2	scaffold 1	NW_021837045.1	89545412	89545470	+	13483.8	26444	26395	0	49	auauuguccugucacagcagu	cuguuguuucgggacauuuaca	auauuguccugucacagcaguacuguuacuaauuuacuguuguuucgggacauuuaca
30	aal-miR-87	scaffold 6	NW_021838798.1	21642176	21642246	+	11957.8	23450	23192	0	258	gugagcaaauuuucaggugugu	cagccugaaauuugcuaaaccu	cagccugaaauuugcuaaaccuguguguauuugauuugaacaaucaaggugagcaaauuuucaggugugu
31	aal-miR-375-1	scaffold 543	NW_021838736.1	59266	59349	+	11923.6	23385	23160	0	225	uuuguucguuuggcucgaguua	acuuaagcccagcguacagaaacu	acuuaagcccagcguacagaaacuugaaucugaaucgauucuagauuggcucugcaagaaguuuguucguuuggcucgaguua
	aal-miR-375-2	scaffold 8	NW_021839020.1	61952243	61952329	+	11923.3	23385	23160	0	225	uuuguucguuuggcucgaguua	acuuaagcccagcguacagaaacu	acuuaagcccagcguacagaaacuugaaucugaaucggccguucuagauuggcucugcaagaaguuuguucguuuggcucgaguua
	aal-miR-375-3	scaffold 311	NW_021838479.1	522169	522255	-	11923.1	23385	23160	0	225	uuuguucguuuggcucgaguua	acuuaagcccagcguacagaaacu	acuuaagcccagcguacagaaacuugaaucugaaucugccauucuagauuggcuuugaaaggaguuuguucguuuggcucgaguua
32	aal-miR-210-1	scaffold 352	NW_021838524.1	244703	244760	+	8736.5	17132	16949	0	183	cuugugcgugugacaacggcuau	gcugcugaccacugcacaagau	gcugcugaccacugcacaagauuagauuaugacucuugugcgugugacaacggcuau
	aal-miR-210-2	scaffold 6	NW_021838798.1	44099251	44099308	-	8736.3	17132	16949	0	183	cuugugcgugugacaacggcuau	gcugcugaccacugcacaagau	gcugcugaccacugcacaagauuagauuaugacucuugugcgugugacaacggcuau
	aal-miR-210-3	scaffold 6	NW_021838798.1	43361049	43361106	-	8736.3	17132	16949	0	183	cuugugcgugugacaacggcuau	gcugcugaccacugcacaagau	gcugcugaccacugcacaagauuagauuaugacucuugugcgugugacaacggcuau
	aal-miR-210-4	scaffold 352	NW_021838524.1	397383	397440	+	8736.1	17132	16949	0	183	cuugugcgugugacaacggcuau	gcugcugaccacugcacaagau	gcugcugaccacugcacaagauuagauuaugacucuugugcgugugacaacggcuau
33	aal-miR-263b-1	scaffold 15	NW_021837600.1	27906921	27906987	+	8304.4	16284	16249	2	33	cuuggcacugggagaauucacag	guggaucuuuucgugccaucgu	cuuggcacugggagaauucacaggcguuauguugcuaucauucuguggaucuuuucgugccaucgu
	aal-miR-263b-2	scaffold 15	NW_021837600.1	28306306	28306372	-	8303.5	16282	16249	0	33	cuuggcacugggagaauucacag	guggaucuuuucgugccaucgu	cuuggcacugggagaauucacaggcgcuauuuugcuaucauucuguggaucuuuucgugccaucgu
	aal-miR-263b-3	scaffold 15	NW_021837600.1	28717523	28717589	-	8303.4	16282	16249	0	33	cuuggcacugggagaauucacag	guggaucuuuucgugccaucgu	cuuggcacugggagaauucacaggcguuauuuugcuaucauucuguggaucuuuucgugccaucgu
34	aal-miR-33	scaffold 6	NW_021838798.1	58233515	58233583	-	6940.1	13607	13290	4	313	gugcauuguaguugcauugca	caauucuucugcaaugcaagcc	gugcauuguaguugcauugcacuuucgcguucgauaccaaucggugcaauucuucugcaaugcaagcc
35	aal-miR-1175-1	scaffold 17	NW_021837822.1	36254829	36254891	-	6200.4	12158	6744	0	5414	ugagauucuacuucuccgacuuaa	aaguggaguaguggucucaucgcu	aaguggaguaguggucucaucgcuuaguauuagaaaagugagauucuacuucuccgacuuaa
	aal-miR-1175-2	scaffold 17	NW_021837822.1	39020028	39020090	-	6200.4	12158	6744	0	5414	ugagauucuacuucuccgacuuaa	aaguggaguaguggucucaucgcu	aaguggaguaguggucucaucgcuuaguauuagaaaagugagauucuacuucuccgacuuaa
36	aal-miR-283	scaffold 17	NW_021837822.1	38083736	38083811	-	5442.2	10669	10667	0	2	caauaucagcugguaauucuggg	cggaauuccaacugauauccac	caauaucagcugguaauucugggcugguauccaacccguaaauguucgcuucccggaauuccaacugauauccac
37	aal-miR-278-1	scaffold 7	NW_021838909.1	41311314	41311378	+	5144.5	10085	9674	11	400	ucggugggacuuucguccguuu	acggacgauagucuucagcggcc	acggacgauagucuucagcggccgugcauuugauagacuuggucggugggacuuucguccguuu
	aal-miR-278-2	scaffold 7	NW_021838909.1	44732912	44732976	+	5144.1	10084	9674	10	400	ucggugggacuuucguccguuu	acggacgauagucuucagcggcc	acggacgauagucuucagcggccgugcauuugauagacguggucggugggacuuucguccguuu
38	aal-miR-999-1	scaffold 9	NW_021839130.1	6342353	6342414	-	4194.9	8222	8216	0	6	uguuaacuguaagacugugucu	acgcggucgugcaggaaauuauu	acgcggucgugcaggaaauuauuuggcauuagauucaaauguuaacuguaagacugugucu
	aal-miR-999-2	scaffold 9	NW_021839130.1	5326319	5326380	-	4194.9	8222	8216	0	6	uguuaacuguaagacugugucu	acgcggucgugcaggaaauuauu	acgcggucgugcaggaaauuauuuggcauuagauucaaauguuaacuguaagacugugucu
39	aal-miR-1890	scaffold 2	NW_021838153.1	140001313	140001377	+	3751.4	7353	7156	1	196	ugaaaucuuugauuaggucugg	agagcuaauuggagaguuccug	agagcuaauuggagaguuccugaauaguguugugaaccuucaugaaaucuuugauuaggucugg
40	aal-miR-92b-1	scaffold 1	NW_021837045.1	113777523	113777585	-	3552	6962	6950	0	12	aauugcacuugucccggccugc	aggucgugacuugugccuguuug	aggucgugacuugugccuguuugcugaauuuuaauggucaaauugcacuugucccggccugc
	aal-miR-92b-2	scaffold 1	NW_021837045.1	113359419	113359481	-	3552	6962	6950	0	12	aauugcacuugucccggccugc	aggucgugacuugugccuguuug	aggucgugacuugugccuguuugcugaauuuuaauggucaaauugcacuugucccggccugc
41	aal-miR-309a-1	scaffold 14	NW_021837489.1	14563243	14563310	+	3420.4	6705	6700	0	5	ucacugggcaaaguuugucgc	cgacaaacuucguucaguuggug	cgacaaacuucguucaguuggugucguuuaccgguuuccaguuucaucacugggcaaaguuugucgc
	aal-miR-309a-2	scaffold 14	NW_021837489.1	15215962	15216029	-	3420.4	6705	6700	0	5	ucacugggcaaaguuugucgc	cgacaaacuucguucaguuggug	cgacaaacuucguucaguuggugucguuuaccgguuuccaguuucaucacugggcaaaguuugucgc
	aal-miR-309a-3	scaffold 14	NW_021837489.1	11859851	11859918	-	3417.6	6701	6700	0	1	ucacugggcaaaguuugucgc	cgacuaacuucguucaguuggu	cgacuaacuucguucaguuggugucauuuaccgguuuccaguuucaucacugggcaaaguuugucgc
42	aal-miR-92a-1	scaffold 1	NW_021837045.1	113825010	113825072	-	3384.4	6634	6471	0	163	uauugcacuugucccggccuau	cgguacggacaggggcaacauu	cgguacggacaggggcaacauugugacauuugaaagcuaauauugcacuugucccggccuau
	aal-miR-92a-2	scaffold 1	NW_021837045.1	113395982	113396044	-	3384.4	6634	6471	0	163	uauugcacuugucccggccuau	cgguacggacaggggcaacauu	cgguacggacaggggcaacauugugacauuugaaagcuaauauugcacuugucccggccuau
43	aal-miR-981a	scaffold 11	NW_021837156.1	46067068	46067132	-	3329.8	6526	6490	14	22	uucguugucgacgaaaccugca	cggguuucgcggcgaacgggcu	cggguuucgcggcgaacgggcuuccaccaugaugaauagcaguucguugucgacgaaaccugca
44	aal-miR-981b	scaffold 49	NW_021838676.1	3544175	3544239	-	3319.3	6505	6490	14	1	uucguugucgacgaaaccugca	cggguuucgcgacgaacgggcu	cggguuucgcgacgaacgggcuuccaccaugaugaauagcaguucguugucgacgaaaccugca
45	aal-miR-125-1	scaffold 5	NW_021838687.1	29405275	29405334	+	3089.2	6055	5819	0	236	ucccugagacccuaacuuguga	acaaguuuugaucuccgguau	ucccugagacccuaacuugugacuauaguugaaguuucacaaguuuugaucuccgguau
	aal-miR-125-2	scaffold 5	NW_021838687.1	29527794	29527853	-	3089.2	6055	5819	0	236	ucccugagacccuaacuuguga	acaaguuuugaucuccgguau	ucccugagacccuaacuugugacuauaguugaaguuucacaaguuuugaucuccgguau
46	aal-miR-133	scaffold 8	NW_021839020.1	56462679	56462763	-	3074.2	6026	5952	0	74	uugguccccuucaaccagcugu	agcugguugacuucgggucaaau	agcugguugacuucgggucaaaucgucaaauauuugcaaagauauuuccucugugaaaucauuugguccccuucaaccagcugu
47	aal-miR-988	scaffold 2	NW_021838153.1	8390733	8390792	-	2994.9	5870	5720	0	150	ccccuuguugcaaaccucacgc	gugugcuuugugacaaugagau	gugugcuuugugacaaugagauuugguucgaaaucauccccuuguugcaaaccucacgc
48	aal-miR-305	scaffold 8	NW_021839020.1	11004063	11004123	+	2567	5032	4711	0	321	auuguacuucaucaggugcucugg	cggcacauguuggaguacacuu	auuguacuucaucaggugcucugguuguuuucgauacccggcacauguuggaguacacuu
49	aal-miR-12	scaffold 17	NW_021837822.1	38075250	38075342	-	2239.5	4389	3997	2	390	ugaguauuacaucagguacuggu	caguacuuauguuaugcucucu	ugaguauuacaucagguacuggugucgauauucgaaucacaaacgaaucggguuccuuugauuagcuuaccaguacuuauguuaugcucucu
50	aal-miR-927-1	scaffold 11	NW_021837156.1	12611437	12611500	-	1966.5	3853	3475	14	364	uuuagaauuccuacgcuuuacc	caaagcguuuggguucugaaa	uuuagaauuccuacgcuuuaccgugauuugucgaaaguuuggcaaagcguuuggguucugaaa
	aal-miR-927-2	scaffold 51	NW_021838699.1	2574047	2574110	-	1959.1	3839	3475	0	364	uuuagaauuccuacgcuuuacc	caaagcguuuggguucugaaa	uuuagaauuccuacgcuuuaccgugauuugucaaaaguuuggcaaagcguuuggguucugaaa
51	aal-miR-315	scaffold 66	NW_021838865.1	3030081	3030144	-	1902.5	3728	3673	3	52	uuuugauuguugcucagaaagcc	cuuucgagcaguaaucagagu	uuuugauuguugcucagaaagccgugcauuugaaacgggucgcuuucgagcaguaaucagagu
52	aal-miR-315b	scaffold 1372	NW_021837459.1	103	164	-	43.9	83	52	3	28	cuuucgagcaguaaucagagu	uugauuguugcucagaaagcc	uugauuguugcucagaaagccgugcauuugaaacgggucgcuuucgagcaguaaucagagu
53	aal-miR-282-1	scaffold 2	NW_021838153.1	3583501	3583574	+	1699	3327	3299	0	28	uagccucuccuaggcuuugucu	acauagccugacagagguuagg	uagccucuccuaggcuuugucugugguaccgcuuggaaauuugcuagccagacauagccugacagagguuagg
	aal-miR-282-2	scaffold 2	NW_021838153.1	5011559	5011632	+	1699	3327	3299	0	28	uagccucuccuaggcuuugucu	acauagccugacagagguuagg	uagccucuccuaggcuuugucugugguaccgcuuggaaauuugcuagccagacauagccugacagagguuagg
	aal-miR-282-3	scaffold 2	NW_021838153.1	571193	571266	+	1699	3327	3299	0	28	uagccucuccuaggcuuugucu	acauagccugacagagguuagg	uagccucuccuaggcuuugucugugguaccgcuuggaaauuugcuagccagacauagccugacagagguuagg
54	aal-miR-190	scaffold 2	NW_021838153.1	114151909	114151973	-	1134.8	2221	2067	0	154	agauauguuugauauucuugguu	cccaggaaucaaacauauuauu	agauauguuugauauucuugguuguuaaauuuuauauuaucacccaggaaucaaacauauuauu
55	aal-miR-137-1	scaffold 4	NW_021838576.1	111943250	111943311	-	1016.6	1991	1916	0	75	uauugcuugagaauacacguag	acgcguauucuuggguuauuaac	acgcguauucuuggguuauuaacacacuguuuauguuguuauugcuugagaauacacguag
	aal-miR-137-2	scaffold 4	NW_021838576.1	104270859	104270920	+	1016.6	1991	1916	0	75	uauugcuugagaauacacguag	acgcguauucuuggguuauuaac	acgcguauucuuggguuauuaacacacuguuuauguuguuauugcuugagaauacacguag
56	aal-miR-957-1	scaffold 3	NW_021838465.1	126045326	126045392	+	642.8	1255	1187	0	68	ugaaaccguccaaaacugagg	guuaguuuugggcggguuuuagu	guuaguuuugggcggguuuuaguguauuucgauuagaguaucaauugaaaccguccaaaacugagg
	aal-miR-957-2	scaffold 3	NW_021838465.1	135064139	135064205	+	642.8	1255	1187	0	68	ugaaaccguccaaaacugagg	guuaguuuugggcggguuuuagu	guuaguuuugggcggguuuuaguguauuucgauuagaguaucaauugaaaccguccaaaacugagg
57	aal-miR-10365-1	scaffold 232	NW_021838391.1	658546	658620	-	635.3	1241	951	0	290	auuagaauguggaaucuguuuu	aaaaguuuucauauucuugcgg	auuagaauguggaaucuguuuuuguacaacaaaguguuacaaaacgaagcaaaaaaguuuucauauucuugcgg
	aal-miR-10365-2	scaffold 3	NW_021838465.1	9111239	9111313	-	635.2	1241	951	0	290	auuagaauguggaaucuguuuu	aaaaguuuucauauucuugcgg	auuagaauguggaaucuguuuuuguacaacaaaguguuacaaaacgaagcaaaaaaguuuucauauucuugcgg
	aal-miR-10365-3	scaffold 232	NW_021838391.1	877843	877917	+	635	1241	951	0	290	auuagaauguggaaucuguuuu	aaaaguuuucauauucuugcgg	auuagaauguggaaucuguuuuuguacaacaaaguguuacaaaacgaagcaaaaaaguuuucauauucuugcgg
58	aal-miR-219	scaffold 2	NW_021838153.1	59079452	59079520	+	539.8	1055	1025	0	30	ugauuguccaaacgcaauucuug	agaguugugacuggacauccgug	ugauuguccaaacgcaauucuuguuuuauucgaauaugauauccaagaguugugacuggacauccgug
59	aal-miR-79	scaffold 8	NW_021839020.1	67218232	67218294	+	531.3	1037	976	0	61	auaaagcuagauuaccaaagcau	gcuuuggcgcuuuagcuguauga	gcuuuggcgcuuuagcuguaugauagaauuuaauauuucauaaagcuagauuaccaaagcau
60	aal-miR-993	scaffold 13	NW_021837378.1	46669554	46669625	-	333.8	650	576	0	74	gaagcucguuucuauagagguau	uacccuguaguuccgggcuuuug	uacccuguaguuccgggcuuuugugguuucuuuuauuguuaauuaucagaagcucguuucuauagagguau
61	aal-miR-929	scaffold 16	NW_021837711.1	38269277	38269335	-	230.5	446	261	0	185	cucccuaacggagucagauug	aaauugacucuaguagggaguc	aaauugacucuaguagggaguccuuguguacgagugacucccuaacggagucagauug
62	aal-miR-980a	scaffold 13	NW_021837378.1	49018859	49018921	-	143.7	277	265	0	12	uagcugccuagugaagggcaau	cggucguucauugggucaucuagc	cggucguucauugggucaucuagcucguauuggaaacaguuagcugccuagugaagggcaau
63	aal-miR-980b	scaffold 13	NW_021837378.1	51107038	51107099	+	3.3	265	265	0	0	uagcugccuagugaagggcaau	ggccauucauugggucaucuagc	ggccauucauugggucaucuagcucguguuggaaacaguuagcugccuagugaagggcaau
64	aal-miR-965-1	scaffold 2	NW_021838153.1	126433916	126433980	-	122.9	236	210	0	26	uaagcguauagcuuuucccauu	gggggaaauccuguacgcuguaug	gggggaaauccuguacgcuguauguuguauuugagcaauccauaagcguauagcuuuucccauu
	aal-miR-965-2	scaffold 2	NW_021838153.1	121300257	121300321	+	122.9	236	210	0	26	uaagcguauagcuuuucccauu	gggggaaauccuguacgcuguaug	gggggaaauccuguacgcuguauguuguauuugagcaauccauaagcguauagcuuuucccauu
65	aal-miR-11893-1	scaffold 10	NW_021837046.1	32885997	32886056	-	34.1	67	58	0	9	uuccugacuuauacgcuuaccu	guaaguagauaaaucagaaaga	guaaguagauaaaucagaaagacguugaagucgcuucuuccugacuuauacgcuuaccu
	aal-miR-11893-2	scaffold 10	NW_021837046.1	40021279	40021338	+	33.7	67	58	0	9	uuccugacuuauacgcuuaccu	guaaguagauaaaucagaaaga	guaaguagauaaaucagaaagacguugaagucguuucuuccugacuuauacgcuuaccu
66	aal-miR-307-1	scaffold 7	NW_021838909.1	51337527	51337584	-	3.8	804	803	0	1	ucacaaccuccuugagugagc	acucacucaaccugggugugaug	acucacucaaccugggugugaugcuuauuugaaucaucacaaccuccuugagugagc
	aal-miR-307-2	scaffold 7	NW_021838909.1	47359811	47359868	-	3.7	804	803	0	1	ucacaaccuccuugagugagc	acucacucaaccugggugugaug	acucacucaaccugggugugaugcuuauuugaaucaucacaaccuccuugagugagc
	aal-miR-307-3	scaffold 7	NW_021838909.1	49698983	49699040	+	3.6	804	803	0	1	ucacaaccuccuugagugagc	acucacucaaccugggugugaug	acucacucaaccugggugugaugcuuauuugaaucaucacaaccuccuugagugagc
67	aal-miR-2a-1	scaffold 736	NW_021838950.1	98442	98504	+	3.6	129649	129627	5	17	uaucacagccagcuuugaag	ucucaaaguggcugugaaaug	ucucaaaguggcugugaaaugaguuacucaugaacggucccauaucacagccagcuuugaag
	aal-miR-2a-2	scaffold 4	NW_021838576.1	39237039	39237101	+	3.4	129649	129627	5	17	uaucacagccagcuuugaag	ucucaaaguggcugugaaaug	ucucaaaguggcugugaaaugaguuacucaugaacggucccauaucacagccagcuuugaag
	aal-miR-2a-3	scaffold 4	NW_021838576.1	38273350	38273412	-	3.4	129644	129627	0	17	uaucacagccagcuuugaag	ucucaaaguggcugugaaaug	ucucaaaguggcugugaaaugaguuacucaagaacggucccauaucacagccagcuuugaag
	aal-miR-2a-4	scaffold 736	NW_021838950.1	97885	97963	+	n.a.	71390	71388	n.a.	0	uaucacagccagcuuugaugagc	n.a.	ugcguuggcaucaaauuugguuguuuuaguacaacccaucggaaaccccuaucacagccagcuuugaugagcaacgca
	aal-miR-2a-5	scaffold 4	NW_021838576.1	39236486	39236564	+	n.a.	71390	71388	n.a.	0	uaucacagccagcuuugaugagc	n.a.	ugcguuggcaucaaauuugguuguuuuaguacaacccaucggaaaccccuaucacagccagcuuugaugagcaacgca
	aal-miR-2a-6	scaffold 4	NW_021838576.1	38273894	38273971	-	n.a.	71390	71388	n.a.	0	uaucacagccagcuuugaugagc	n.a.	ugcguuggcaucaaauuugguuguuuaguacaacccaucggaaaccccuaucacagccagcuuugaugagcaacgca
68	aal-miR-275	scaffold 8	NW_021839020.1	10987306	10987367	+	3.6	40014	39682	0	332	ucagguaccugaaguagcgcg	cgcgcuaagcaggaaccgagacu	cgcgcuaagcaggaaccgagacuuugucauucgcuagcagucagguaccugaaguagcgcg
69	aal-miR-2946-1	scaffold 81	NW_021839032.1	1872248	1872308	-	3.6	6103	6103	0	0	uaguacggaaaagauaugggg	ccauauuuuuaccgguacugca	ccauauuuuuaccgguacugcauuccauuguaguaauuguaguacggaaaagauaugggg
	aal-miR-2946-2	scaffold 1234	NW_021837306.1	65163	65223	+	3.5	6103	6103	0	0	uaguacggaaaagauaugggg	ccauauuuuuaccgguacugca	ccauauuuuuaccgguacugcauuccauuguaguaauuguaguacggaaaagauaugggg
70	aal-miR-996	scaffold 25	NW_021838410.1	10471904	10471975	-	3.3	36719	36718	0	1	ugacuagauuacaugcucgucu	cggcgugcauguaucuggugcacg	cggcgugcauguaucuggugcacgguuuuccaguuguaauaucgcuucgugacuagauuacaugcucgucu
71	aal-miR-317	scaffold 436	NW_021838617.1	395647	395704	+	3.3	228044	228042	0	2	ugaacacagcuggugguaucu	ggauacacccugugcucgcu	ggauacacccugugcucgcuuugcauucgaaacuagugaacacagcuggugguaucu
72	aal-miR-286a-1	scaffold 2	NW_021838153.1	153117421	153117493	+	3.2	33	32	0	1	ugacuagaccgaacacucgcg	gccgaaugucggccuagucgcu	gccgaaugucggccuagucgcugcguauuucugcgaaacuguuuccacuagugacuagaccgaacacucgcg
	aal-miR-286a-2	scaffold 174	NW_021837867.1	689307	689379	+	3.2	33	32	0	1	ugacuagaccgaacacucgcg	gccgaaugucggccuagucgcu	gccgaaugucggccuagucgcugcguaauucugcgaaacuguuuccacuagugacuagaccgaacacucgcg
	aal-miR-286a-3	scaffold 2	NW_021838153.1	161123006	161123078	-	3.2	33	32	0	1	ugacuagaccgaacacucgcg	gccgaaugucggccuagucgcu	gccgaaugucggccuagucgcugcguauuucugcgaaacuguuuccacuagugacuagaccgaacacucgcg
	aal-miR-286a-4	scaffold 174	NW_021837867.1	356344	356416	+	3.2	33	32	0	1	ugacuagaccgaacacucgcg	gccgaaugucggccuagucgcu	gccgaaugucggccuagucgcugcguauuucugcgaaacuguuuccacuagugacuagaccgaacacucgcg
73	aal-miR-279	scaffold 25	NW_021838410.1	10474618	10474681	-	3.2	13747	13312	0	435	ugacuagauccacacucauu	gaugggugugaaucuaguguuuc	gaugggugugaaucuaguguuucacaugauguucgauagccugugacuagauccacacucauu
74	aal-miR-263a-1	scaffold 5	NW_021838687.1	86502750	86502812	-	3	18548	18163	0	385	aauggcacuggaagaauucacg	cguguucuggcaguggcauccc	aauggcacuggaagaauucacggguauauuuugaaauccccguguucuggcaguggcauccc
	aal-miR-263a-2	scaffold 5	NW_021838687.1	88156151	88156213	+	2.8	18548	18163	0	385	aauggcacuggaagaauucacg	cguguucuggcaguggcauccc	aauggcacuggaagaauucacggguauauuuugaaauccccguguucuggcaguggcauccc
75	aal-miR-309b-1	scaffold 174	NW_021837867.1	356985	357045	+	2.8	47	47	0	0	ucacugggcauaguuugucgc	gucaaacuccguucaguuggug	gucaaacuccguucaguugguggauuucaucaucagucaucacugggcauaguuugucgc
	aal-miR-309b-2	scaffold 2	NW_021838153.1	153118056	153118116	+	2.8	47	47	0	0	ucacugggcauaguuugucgc	gucaaacuccguucaguuggug	gucaaacuccguucaguugguggauuucaucaucagucaucacugggcauaguuugucgc
	aal-miR-309b-3	scaffold 2	NW_021838153.1	161122379	161122439	-	2.2	47	47	0	0	ucacugggcauaguuugucgc	gucaaacuccguucaguuggug	gucaaacuccguucaguugguggauuucaucaucagucaucacugggcauaguuugucgc
	aal-miR-309b-4	scaffold 174	NW_021837867.1	689942	690002	+	1.9	47	47	0	0	ucacugggcauaguuugucgc	gucaaacuccguucaguuggug	gucaaacuccguucaguugguggauuucaucaucagucaucacugggcauaguuugucgc
76	aal-miR-193-1	scaffold 3	NW_021838465.1	75810431	75810494	+	2.2	1135	1048	0	87	uacuggccuacuaaguccca	ugggauuuuguggaccaga	ugggauuuuguggaccagaagauuuccugcauucgauaauagcuacuggccuacuaaguccca
	aal-miR-193-2	scaffold 3	NW_021838465.1	73835318	73835381	+	2.2	1135	1048	0	87	uacuggccuacuaaguccca	ugggauuuuguggaccaga	ugggauuuuguggaccagaagauuuccugcauucgauaauagcuacuggccuacuaaguccca
	aal-miR-193-3	scaffold 3	NW_021838465.1	73308097	73308160	+	2.2	1135	1048	0	87	uacuggccuacuaaguccca	ugggauuuuguggaccaga	ugggauuuuguggaccagaagauuuccugcauucgauaauagcuacuggccuacuaaguccca
77	aal-miR-31-1	scaffold 1	NW_021837045.1	188175136	188175194	+	2.2	30858	29815	0	1043	uggcaagauguuggcauagcu	agcuauucaacuucuugucuau	uggcaagauguuggcauagcugaaaguuuugaguuuagcuauucaacuucuugucuau
	aal-miR-31-2	scaffold 1	NW_021837045.1	187593146	187593204	+	2.2	30858	29815	0	1043	uggcaagauguuggcauagcu	agcuauucaacuucuugucuau	uggcaagauguuggcauagcugaaaguuuugaguuuagcuauucaacuucuugucuau
	aal-miR-31-3	scaffold 1	NW_021837045.1	189086997	189087055	+	2.2	30858	29815	0	1043	uggcaagauguuggcauagcu	agcuauucaacuucuugucuau	uggcaagauguuggcauagcugaaaguuuugaguuuagcuauucaacuucuugucuau
78	aal-miR-11900-1	scaffold 9	NW_021839130.1	58217343	58217409	-	2	107	107	0	0	auuuuuuugacuguaauuuuau	aaaauuacguugaagaacuaa	aaaauuacguugaagaacuaaaccuccgguagaacuaacgggagauuuuuuugacuguaauuuuau
	aal-miR-11900-2	scaffold 211	NW_021838245.1	586626	586692	-	2	107	107	0	0	auuuuuuugacuguaauuuuau	aaaauuacguugaagaacuaa	aaaauuacguugaagaacuaaaccuccgguagaacuaacgggagauuuuuuugacuguaauuuuau
	aal-miR-11900-3	scaffold 211	NW_021838245.1	255255	255321	+	1.6	107	107	0	0	auuuuuuugacuguaauuuuau	aaaauuacguugaagaacuaa	aaaauuacguugaagaacuaaaccuccgguagaacuaacgggagauuuuuuugacuguaauuuuau
79	aal-miR-7-1	scaffold 22	NW_021838343.1	14822631	14822693	+	-1.2	140816	140312	0	504	uggaagacuagugauuuuguuguu	caauaaaucucaagucuuucua	uggaagacuagugauuuuguuguuuugcuuacgauaauaacaauaaaucucaagucuuucua
	aal-miR-7-2	scaffold 22	NW_021838343.1	14831773	14831835	+	-1.2	140816	140312	0	504	uggaagacuagugauuuuguuguu	caauaaaucucaagucuuucua	uggaagacuagugauuuuguuguuuugcuuacgauaauaacaauaaaucucaagucuuucua
80	aal-miR-10378-1	scaffold 37	NW_021838543.1	1226677	1226752	-	3.1	13603	13603	0	0	ucuaucauuugaguaccauga	gugguacucuuuugguacaga	gugguacucuuuugguacagauuuugagugcgauugcucuaucaauuaacauucucuaucauuugaguaccauga
	aal-miR-10378-2	scaffold 37	NW_021838543.1	1168240	1168315	-	3.1	13603	13603	0	0	ucuaucauuugaguaccauga	gugguacucuuuugguacaga	gugguacucuuuugguacagauuuugagugcgauugcucuaucaauuaacauucucuaucauuugaguaccauga
	aal-miR-10378-3	scaffold 1029	NW_021837079.1	49887	49968	-	3	13603	13603	0	0	ucuaucauuugaguaccauga	gugguacucuuuugguacaga	gugguacucuuuugguacagauuucaagugcaauugcgauuacacuuucaucuaacauucucuaucauuugaguaccauga
81	aal-miR-5-1	scaffold 14	NW_021837489.1	14562839	14562904	+	113.5	220	195	0	25	gaaggaacucccggugugauauu	uaucacagcaguaguuaccua	gaaggaacucccggugugauauucgcaguuucaauuggauagcauaucacagcaguaguuaccua
	aal-miR-5-2	scaffold 14	NW_021837489.1	15216367	15216432	-	113.5	220	195	0	25	gaaggaacucccggugugauauu	uaucacagcaguaguuaccua	gaaggaacucccggugugauauucgcaguuucaauuggauagcauaucacagcaguaguuaccua
	aal-miR-5-3	scaffold 14	NW_021837489.1	11860259	11860324	-	113.5	220	195	0	25	gaaggaacucccggugugauauu	uaucacagcaguaguuaccua	gaaggaacucccggugugauauucgcaguuucaauuggauagcauaucacagcaguaguuaccua
82	aal-miR-971	scaffold 40	NW_021838577.1	2744000	2744063	-	3.6	1040	1040	0	0	uugguguuauaucuuacagugag	agcuguaaguauuacagcaagc	agcuguaaguauuacagcaagcuagcuauucgaaaggcgcuugguguuauaucuuacagugag
83	aal-miR-new1-1	scaffold 4	NW_021838576.1	38273685	38273776	-	6983.8	13693	13378	0	315	uaucacagccauuuugaugagcu	gcucaucaauugguuguggcuaug	gcucaucaauugguuguggcuaugugcccuugaguagcguuuucgcaccguacgaagcguccccaucauaucacagccauuuugaugagcu
	aal-miR-new1-2	scaffold 4	NW_021838576.1	39236682	39236773	+	6983.7	13693	13378	0	315	uaucacagccauuuugaugagcu	gcucaucaauugguuguggcuaug	gcucaucaauugguuguggcuaugugcccuugaguagcguuuucgcaccguacgaagcguccccaucauaucacagccauuuugaugagcu
	aal-miR-new1-3	scaffold 736	NW_021838950.1	98078	98169	+	6983.7	13693	13378	0	315	uaucacagccauuuugaugagcu	gcucaucaauugguuguggcuaug	gcucaucaauugguuguggcuaugugcccuugaguagcguuuucgcaccguacgaagcguccccaucauaucacagccauuuugaugagcu
84	aal-miR-new2-1	scaffold 66	NW_021838865.1	606781	606841	+	2101.5	4117	4053	0	64	guaggccggcggaaacuacuugc	agggguuucuuucggccuccag	agggguuucuuucggccuccagcggcauuagaaaguuguaggccggcggaaacuacuugc
	aal-miR-new2-2	scaffold 44	NW_021838621.1	5447967	5448027	+	2101.4	4117	4053	0	64	guaggccggcggaaacuacuugc	agggguuucuuucggccuccag	agggguuucuuucggccuccagcggcauuagaaaguuguaggccggcggaaacuacuugc
85	aal-miR-new3	scaffold 8	NW_021839020.1	47113049	47113109	-	1600.1	3140	2684	0	456	uuuaugcauucacuucugcuga	agcaggagugaaugcauaaguu	agcaggagugaaugcauaaguuuggcauuugauacuaauuuaugcauucacuucugcuga
86	aal-miR-new4-1	scaffold 7	NW_021838909.1	6806688	6806750	-	641	1258	1189	0	69	agaucccaucaaccccacugcu	cagugggguuagugggauccuu	agaucccaucaaccccacugcuguuuuguugagcacuuagcagugggguuagugggauccuu
	aal-miR-new4-2	scaffold 7	NW_021838909.1	7621715	7621777	-	641	1258	1189	0	69	agaucccaucaaccccacugcu	cagugggguuagugggauccuu	agaucccaucaaccccacugcuguuuuguugagcacuuagcagugggguuagugggauccuu
	aal-miR-new4-3	scaffold 7	NW_021838909.1	10774192	10774254	-	641	1258	1189	0	69	agaucccaucaaccccacugcu	cagugggguuagugggauccuu	agaucccaucaaccccacugcuguuuuguugaacacuuagcagugggguuagugggauccuu
	aal-miR-new4-4	scaffold 7	NW_021838909.1	10434325	10434387	-	640.8	1258	1189	0	69	agaucccaucaaccccacugcu	cagugggguuagugggauccuu	agaucccaucaaccccacugcuguuuuguugaacacuuagcagugggguuagugggauccuu
87	aal-miR-new5	scaffold 4	NW_021838576.1	4909142	4909203	+	512.6	1007	872	0	135	aaugcagcguucaaaacauaguuu	acgguguuuugaauggcaaug	acgguguuuugaauggcaaugggcccauaacgcuuccaaugcagcguucaaaacauaguuu
88	aal-miR-new6	scaffold 19	NW_021838042.1	6607827	6607891	-	387.7	764	748	0	16	agaucuuguauuuugauguucug	gaacucaauauacaagaucaug	agaucuuguauuuugauguucugaugaguuugauaugggccggaacucaauauacaagaucaug
89	aal-miR-new7-1	scaffold 222	NW_021838366.1	616474	616534	+	376.2	746	726	0	20	aaagcaaccgaacaauugucc	ggcuuuugcuugguagccucag	aaagcaaccgaacaauuguccaagugcuauaaagguuuggcuuuugcuugguagccucag
	aal-miR-new7-2	scaffold 219	NW_021838332.1	454934	454994	-	376.2	746	726	0	20	aaagcaaccgaacaauugucc	ggcuuuugcuugguagccucag	aaagcaaccgaacaauuguccaagugcuauaaagguuuggcuuuugcuugguagccucag
90	aal-miR-new8a (related to aal-miR5)	scaffold 14	NW_021837489.1	11860048	11860105	-	235.7	457	456	0	1	aaaggaaccuguacagcgaugc	aucgcaguagauguucuucaau	aaaggaaccuguacagcgaugcgaacgcuagucgcaucgcaguagauguucuucaau
91	aal-miR-new8b-1 (related to aal-miR5)	scaffold 14	NW_021837489.1	14563057	14563114	+	90.6	173	172	0	1	aaaggaaccuguacagcgaug	aucgcaguagauguucuucaau	aaaggaaccuguacagcgaugugaacucaagucacaucgcaguagauguucuucaau
	aal-miR-new8b-2	scaffold 14	NW_021837489.1	15216158	15216215	-	90.6	173	172	0	1	aaaggaaccuguacagcgaug	aucgcaguagauguucuucaau	aaaggaaccuguacagcgaugugaacucaagucacaucgcaguagauguucuucaau
92	aal-miR-new9-1	scaffold 9	NW_021839130.1	63479262	63479322	+	125.7	247	244	0	3	auauggauuucaggaccgcgug	cgcgguccugaaauccagauguu	auauggauuucaggaccgcgugugauccauacaaacacgcgguccugaaauccagauguu
	aal-miR-new9-2	scaffold 601	NW_021838801.1	206307	206367	+	125.7	247	244	0	3	auauggauuucaggaccgcgug	cgcgguccugaaauccagauguu	auauggauuucaggaccgcgugugauccauacaaacacgcgguccugaaauccagauguu
93	aal-miR-new10	scaffold 101	NW_021837058.1	34119	34174	-	92	175	135	0	40	ugggauuugggcccacugccgcu	ucgguauucguccauuuccggagc	ugggauuugggcccacugccgcuggguccccucgguauucguccauuuccggagc
94	aal-miR-new11	scaffold 2	NW_021838153.1	94199746	94199795	+	90.6	181	179	0	2	caagcguucaagacuggucggcc	gcugacugucguggaaccuggag	caagcguucaagacuggucggccgaugcugacugucguggaaccuggag
95	aal-miR-new12-1	scaffold 6	NW_021838798.1	79011533	79011591	-	53.3	106	104	0	2	auguuacauguacuauuucaag	ugaaauaguacauauaacaucc	auguuacauguacuauuucaagcgucguauguaauuugaaauaguacauauaacaucc
	aal-miR-new12-2	scaffold 7	NW_021838909.1	10429827	10429885	-	53.3	106	104	0	2	auguuacauguacuauuucaag	ugaaauaguacauauaacaucc	auguuacauguacuauuucaagcgucauauguagcuugaaauaguacauauaacaucc
	aal-miR-new12-3	scaffold 7	NW_021838909.1	6801156	6801214	-	53.3	106	104	0	2	auguuacauguacuauuucaag	ugaaauaguacauauaacaucc	auguuacauguacuauuucaagcgucauauguagcuugaaauaguacauauaacaucc
96	aal-miR-new13-1	scaffold 25	NW_021838410.1	11694324	11694385	-	49	100	97	0	3	aguggauuaccgcuugaaguggu	cauuccagugguaaaccucgga	aguggauuaccgcuugaaguggucggcauauaagaguaccauuccagugguaaaccucgga
	aal-miR-new13-2	scaffold 5	NW_021838687.1	41440341	41440402	-	48.9	100	97	0	3	aguggauuaccgcuugaaguggu	cauuccagugguaaaccucgga	aguggauuaccgcuugaaguggucggcauauaagaauaccauuccagugguaaaccucgga
97	aal-miR-new14-1	scaffold 616	NW_021838817.1	50856	50945	-	46.3	96	92	3	1	uucguaucuaacugccgucggugc	aucgagaggauguagcauaucucg	aucgagaggauguagcauaucucgcguugacaguaauggugcagacagucgccacgcuguuccgcuucguaucuaacugccgucggugc
	aal-miR-new14-2	scaffold 434	NW_021838615.1	428031	428120	-	46.3	96	92	3	1	uucguaucuaacugccgucggugc	aucgagaggauguagcauaucucg	aucgagaggauguagcauaucucgcguugacaguaauggugcagacagucgccacgcuguuccgcuucguaucuaacugccgucggugc
	aal-miR-new14-3	scaffold 10	NW_021837046.1	52885522	52885611	+	46.3	96	92	3	1	uucguaucuaacugccgucggugc	aucgagaggauguagcauaucucg	aucgagaggauguagcauaucucgcguugacaguaauggugcagacagucgccacgcuguuccgcuucguaucuaacugccgucggugc
98	aal-miR-new15-1	scaffold 7	NW_021838909.1	10771741	10771801	-	41.6	83	65	0	18	ugaaauaauacauguaacagcc	uguugcauguauuauuucaagu	uguugcauguauuauuucaaguguuauaaugugcagcuugaaauaauacauguaacagcc
	aal-miR-new15-2	scaffold 7	NW_021838909.1	7619849	7619909	-	41.6	83	65	0	18	ugaaauaauacauguaacagcc	uguugcauguauuauuucaagu	uguugcauguauuauuucaaguguuauaaugugcagcuugaaauaauacauguaacagcc
	aal-miR-new15-3	scaffold 7	NW_021838909.1	6804404	6804464	-	41.6	83	65	0	18	ugaaauaauacauguaacagcc	uguugcauguauuauuucaagu	uguugcauguauuauuucaaguguuauaaugugcagcuugaaauaauacauguaacagcc
	aal-miR-new15-4	scaffold 7	NW_021838909.1	10432095	10432155	-	41.6	83	65	0	18	ugaaauaauacauguaacagcc	uguugcauguauuauuucaagu	uguugcauguauuauuucaaguguuauaauaugcagcuugaaauaauacauguaacagcc
99	aal-miR-new16-1	scaffold 180	NW_021837932.1	349829	349881	-	24.3	46	44	0	2	agacuguuacucauggaaaa	aucacaugagaaacagucgcc	agacuguuacucauggaaaauaacugucuugaucacaugagaaacagucgcc
	aal-miR-new16-2	scaffold 8	NW_021839020.1	60528180	60528232	-	24.3	46	44	0	2	agacuguuacucauggaaaa	aucacaugagaaacagucgcc	agacuguuacucauggaaaauaacugucuugaucacaugagaaacagucgcc
100	aal-miR-new17	scaffold 2	NW_021838153.1	29410826	29410909	-	23.4	46	17	4	25	aauucuuacaaucgucaaagg	uuugacgauuguaagaacgau	aauucuuacaaucgucaaaggguuaaaauuaccuuuguugacaacaaagguaauuuuaacccuuugacgauuguaagaacgau
101	aal-miR-new18-1	scaffold 13	NW_021837378.1	18281498	18281559	-	18.5	37	29	0	8	uuggcaaacggguauucagcua	uugaaaacccguuugccaaugu	uuggcaaacggguauucagcuaguaugaucaaaaaguaguugaaaacccguuugccaaugu
	aal-miR-new18-2	scaffold 288	NW_021838452.1	55788	55849	+	18.5	37	29	0	8	uuggcaaacggguauucagcua	uugaaaacccguuugccaaugu	uuggcaaacggguauucagcuaguaugaucaaaaaguaguugaaaacccguuugccaaugu
102	aal-miR-new19-1	scaffold 4	NW_021838576.1	88138069	88138133	-	18.3	38	22	0	16	ccauauaugguuuuggucaugu	uaugaccgaauuaauauauggcu	ccauauaugguuuuggucauguauggcaauaaaaauaauuauaugaccgaauuaauauauggcu
	aal-miR-new19-2	scaffold 4	NW_021838576.1	96379025	96379089	-	18	38	22	0	16	ccauauaugguuuuggucaugu	uaugaccgaauuaauauauggcu	ccauauaugguuuuggucauguauggaaauaaaaauaauuauaugaccgaauuaauauauggcu
103	aal-miR-new20-1	scaffold 187	NW_021838009.1	449243	449300	+	17.9	34	19	0	15	uggccagcgcguugacgaagug	cuucgucaacgcgcuggccacg	cuucgucaacgcgcuggccacgacgaagugcaacguggccagcgcguugacgaagug
	aal-miR-new20-2	scaffold 187	NW_021838009.1	449241	449298	-	17.8	34	19	0	15	uggccagcgcguugacgaagug	cuucgucaacgcgcuggccacg	cuucgucaacgcgcuggccacguugcacuucgucguggccagcgcguugacgaagug
104	aal-miR-new21	scaffold 476	NW_021838661.1	394318	394387	-	8.4	20	18	0	2	uuugcucgggucuucuuggaagug	ccacccaacgaucgaaguaggc	uuugcucgggucuucuuggaagugccugagguaucgguccgucgaggccacccaacgaucgaaguaggc
105	aal-miR-new22-1	scaffold 1	NW_021837045.1	16894841	16894892	-	7.2	19	14	0	5	gauguagugaagugucuguggca	cguggacauauuuggugaaucggu	cguggacauauuuggugaaucgguggaugauguagugaagugucuguggca
	aal-miR-new22-2	scaffold 1	NW_021837045.1	19377573	19377624	-	7.2	19	14	0	5	gauguagugaagugucuguggca	cguggacauauuuggugaaucggu	cguggacauauuuggugaaucgguggaugauguagugaagugucuguggca
106	aal-miR-new23	scaffold 2	NW_021838153.1	40204976	40205056	-	5.1	23	21	1	1	ugaacuucuugaguagcuggcucu	agcuucuacgacgaaaucuucuuc	agcuucuacgacgaaaucuucuucuuguugcgaguuuucuuuuacaggaacacaauugaacuucuugaguagcuggcucu
107	aal-miR-new24-1	scaffold 16	NW_021837711.1	18629880	18629963	-	4.6	24	21	2	1	uucgagguuuuguuguuccggga	ccccagcaugucggcauccgaac	uucgagguuuuguuguuccgggagcuaucuguaucguucuaguguguguuuuccuucguuccccagcaugucggcauccgaac
	aal-miR-new24-2	scaffold 784	NW_021839003.1	83694	83777	+	4.6	24	21	2	1	uucgagguuuuguuguuccggga	ccccagcaugucggcauccgaac	uucgagguuuuguuguuccgggagcuaucuguaucguucuaguguguguuuuccuucguuccccagcaugucggcauccgaac
108	aal-miR-new25-1	scaffold 4	NW_021838576.1	88138111	88138178	-	0.8	23	22	0	1	ccauauaugguuuuggucaugu	ugaaaaauuacuuauggcc	ugaaaaauuacuuauggccaauauuaggcaacuuauucuacuguaccauauaugguuuuggucaugu
109	aal-miR-34	scaffold 436	NW_021838617.1	463182	463301	+	n.a.	1715157	1715155	n.a.	0	uggcagugugguuagcugguug	n.a.	aggcaauacgcuauggcagugugguuagcugguuguguagcgcuuuggugggcuuugcgcguucuucgcgcccagguccagauucacaaccacuauccgcccugccgccgcgaagugcc
110	aal-miR-2940-1	scaffold 185	NW_021837987.1	807308	807417	-	n.a.	296854	296852	n.a.	0	gucgacagggagauaaaucacu	n.a.	cauugguuuaucuuaucugucgaggcaaguuauuuuaccggauuguguuucuuuucgugagcaaucaccacuauccagcucuucuugucgacagggagauaaaucacug
	aal-miR-2940-2	scaffold 6	NW_021838798.1	46650442	46650551	-	n.a.	296854	296852	n.a.	0	gucgacagggagauaaaucacu	n.a.	cauugguuuaucuuaucugucgaggcaaguuauuuuaccggauuguguuucauuucgugagcaaucaccacuauccagcucuucuugucgacagggagauaaaucacug
111	aal-miR-2b-1	scaffold 736	NW_021838950.1	104185	104272	+	n.a.	132408	131296	n.a.	0	uaucacagccagcuuugaugagc	n.a.	gggcguauucuagacucucaaaguggcugugaaaugguuuuauuugacucauaucacagccagcuuugaugagcuggacugcgcacc
	aal-miR-2b-2	scaffold 4	NW_021838576.1	38263626	38263713	-	n.a.	132408	131296	n.a.	0	uaucacagccagcuuugaugagc	n.a.	gggcguauucuagacucucaaaguggcugugaaaugguuuuauucgacucauaucacagccagcuuugaugagcuggaaugcgcacc
	aal-miR-2b-3	scaffold 4	NW_021838576.1	39245144	39245231	+	n.a.	132408	131296	n.a.	0	uaucacagccagcuuugaugagc	n.a.	gggcguauucuagacucucaaaguggcugugaaaugguuuuauucgacucauaucacagccagcuuugaugagcuggaaugcgcacc
112	aal-miR-1889	scaffold 17	NW_021837822.1	38075842	38075988	-	n.a.	54458	54458	n.a.	0	uaaucucaaauuguaacagugg	n.a.	gagguaaucucaaauuguaacaguggguugauuuccuugggugaauccuccggggccuugcguucguccucucaacucaaggggcgacgggagugucucccggaaaacguguucgcuauacccacguuacagauugggguuucccc
113	aal-miR-316	scaffold 14	NW_021837489.1	8269813	8269899	+	n.a.	15117	15008	n.a.	0	ugucuuuuuccgcuuacugccg	n.a.	auuuugauugauuugucuuuuuccgcuuacugccgguggcauuugaaauucacgacagcaaaccgaaaaagacgccucaaucaauu
114	aal-miR-11895	scaffold 8	NW_021839020.1	47113047	47113109	-	n.a.	3139	2684	n.a.	0	uucaugcauucacuucugcuga	n.a.	agcaggagugaaugcauaaguuuggcauuugauacuaauuuaugcauucacuucugcugauc
115	aal-miR-306	scaffold 8	NW_021839020.1	67218040	67218162	+	n.a.	915	915	n.a.	0	gagagcaccucgguaucuaagc	n.a.	uucaccggcucagguacugagugacucucagaugugcauuugaaaagcaauccgcacuguccugcggugcgguguugaaaaccccugagagcaccucgguaucuaagccaguguugcgaaaa
116	aal-miR-286b-1	scaffold 14	NW_021837489.1	15216519	15216615	-	n.a.	444	441	n.a.	3	ugacuagaccgaacacucguauccc	n.a.	aaguccuggggcgauugucggcuuagucgcuguaucuuugagacugccggugggcaguuguacgcuagugacuagaccgaacacucgugucccagg
	aal-miR-286b-2	scaffold 14	NW_021837489.1	14562649	14562745	+	n.a.	444	441	n.a.	3	ugacuagaccgaacacucguauccc	n.a.	aaguccuggggcgauugucggcuuagucgcuguaucuuugagacugccggugggcagauguacgcuagugacuagaccgaacacucgugucccagg
	aal-miR-286b-3	scaffold 14	NW_021837489.1	11860411	11860506	-	n.a.	444	441	n.a.	3	ugacuagaccgaacacucguauccc	n.a.	aaguccuggggcgauugucggcuuagucgcuguaucuuugagacugccgguaggcaguuguacgcuagugacuagaccgaacacucgugucccag
117	aal-miR-2944b-1	scaffold 2	NW_021838153.1	153117736	153117798	+	n.a.	212	212	n.a.	0	gaaggaacucccggugugauaua	n.a.	aucgaaggaacucauggugugauauaagauaugauuauaucacagcaguaguuaccugauau
	aal-miR-2944b-2	scaffold 2	NW_021838153.1	161122687	161122749	-	n.a.	212	212	n.a.	0	gaaggaacucccggugugauaua	n.a.	aucgaaggaacucauggugugauauaagauaugauuauaucacagcaguaguuaccugauau
	aal-miR-2944b-3	scaffold 174	NW_021837867.1	356665	356727	+	n.a.	212	212	n.a.	0	gaaggaacucccggugugauaua	n.a.	aucgaaggaacucauggugugauauaagauaugauuauaucacagcaguaguuaccugauau
	aal-miR-2944b-4	scaffold 174	NW_021837867.1	689632	689694	+	n.a.	212	212	n.a.	0	gaaggaacucccggugugauaua	n.a.	aucgaaggaacucauggugugauauaagauaugauuauaucacagcaguaguuaccugauau
118	aal-miR-2942-1	scaffold 3	NW_021838465.1	111884213	111884291	-	n.a.	19	18	n.a.	1	uauucgagacuucacgaguuaau	n.a.	uuaucaauucgcuguggucucgaacguaccuacacuggauauuuuugguauucgagacuucacgaguuaauucccauu
	aal-miR-2942-2	scaffold 3	NW_021838465.1	111488845	111488923	+	n.a.	19	18	n.a.	1	uauucgagacuucacgaguuaau	n.a.	uuaucaauucgcuguggucucgaacguaccuacacuggauauuuuugguauucgagacuucacgaguuaauucccauu
119	aal-miR-2943-1	scaffold 15	NW_021837600.1	13559930	13559998	-	n.a.	17	17	n.a.	0	uuaaguaggcacuugcaggcaaa	n.a.	guuaaguaggcacuugcaggcaaauuugucgcuuuaauaugauugacugcuuuuuccuacuuuacauu
	aal-miR-2943-2	scaffold 15	NW_021837600.1	15049691	15049759	-	n.a.	17	17	n.a.	0	uuaaguaggcacuugcaggcaaa	n.a.	guuaaguaggcacuugcaggcaaauuugucgcuuuaauaugauugacugcuuuuuccuacuuuacauu
120	aal-miR-11899-1	scaffold 4	NW_021838576.1	96379023	96379089	-	n.a.	16	16	n.a.	0	uaugaccgauuuaauauauggcu	n.a.	ccauauaugguuuuggucauguauggaaauaaaaauaauuauaugaccgaauuaauauauggcuca
121	aal-miR-iab-4	scaffold 13	NW_021837378.1	45279007	45279081	-	n.a.	14	14	n.a.	0	cgguauaccuucaguauacguaac	n.a.	gcuucaugaacguauacugaauguauccugagugcuaucuauccgguauaccuucaguauacguaacaggaggc
							121
