# Supplementary material for: Improved reference genome of the arboviral vector Aedes albopictus
Source: Genome Biol. 2020 Aug 26;21:215. doi: 10.1186/s13059-020-02141-w (PMC7448346; doi:10.1186/s13059-020-02141-w)
Supplement: Supplementary file 8 — Additional file 8: Immunity genes annotated in AalbF2. [file 13059_2020_2141_MOESM8_ESM.xlsx]

## Sheet: Sheet1
Additional file 8
Immunity genes annotated in AalbF2
Subject_id	family	LOC	Description	500bp_artifact_call	1000bp_artifact_call
XP_019527044	AMP	LOC109399074	defensin-A	NA	NA
XP_019527113	AMP	LOC109399127	defensin-C-like	NA	NA
XP_019530162	AMP	LOC109402005	attacin-B-like	NA	NA
XP_019538951	AMP	LOC109409889	defensin-C	NA	NA
XP_019932805	AMP	LOC109622804	uncharacterized LOC109622804	NA	NA
XP_029723081	AMP	LOC109399761	attacin-B-like	NA	NA
XP_019524928	APHAG	LOC109397058	cysteine protease ATG4D	NA	NA
XP_019528840	APHAG	LOC109400791	cysteine protease ATG4D	NA	NA
XP_019534945	APHAG	LOC109406305	gamma-aminobutyric acid receptor-associated protein	NA	NA
XP_019537423	APHAG	LOC109408519	nedd8-activating enzyme E1 catalytic subunit	NA	NA
XP_019538097	APHAG	LOC109409138	cysteine protease ATG4B-like	NA	NA
XP_019540554	APHAG	LOC109411487	autophagy protein 12-like	NA	NA
XP_019551596	APHAG	LOC109421533	cysteine protease ATG4B-like	NA	NA
XP_019552736	APHAG	LOC109424501	bcl-2-related ovarian killer protein	NA	NA
XP_019559844	APHAG	LOC109428504	ubiquitin-like-conjugating enzyme ATG10	NA	NA
XP_019560092	APHAG	LOC109428719	WD repeat domain phosphoinositide-interacting protein 2-like	NA	NA
XP_019561602	APHAG	LOC109430033	beclin-1-like protein	NA	NA
XP_019561661	APHAG	LOC109430084	ubiquitin-like-conjugating enzyme ATG10	NA	NA
XP_019931678	APHAG	LOC109621926	WD repeat domain phosphoinositide-interacting protein 2	NA	NA
XP_019931744	APHAG	LOC109621987	SUMO-activating enzyme subunit 2	NA	NA
XP_029708331	APHAG	LOC109422403	bcl-2-related ovarian killer protein-like	NA	NA
XP_029712827	APHAG	LOC109429975	autophagy-related protein 2 homolog A-like	NA	NA
XP_029712849	APHAG	LOC109430704	autophagy-related protein 2 homolog A	NA	NA
XP_029712852	APHAG	LOC115257413	autophagy-related protein 2 homolog A-like	LOC109430704, LOC109429975	LOC109430704, LOC109429975
XP_029719065	APHAG	LOC115261488	gamma-aminobutyric acid receptor-associated protein	NA	NA
XP_029719108	APHAG	LOC109404489	gamma-aminobutyric acid receptor-associated protein	NA	NA
XP_029720102	APHAG	LOC109429896	serine/threonine-protein kinase Tor	NA	NA
XP_029722771	APHAG	LOC109397249	autophagy-related protein 16-1-like	NA	NA
XP_029725003	APHAG	LOC115264950	SUMO-activating enzyme subunit 2-like	NA	NA
XP_029728074	APHAG	LOC109431597	autophagy protein 5	NA	NA
XP_029730180	APHAG	LOC115267358	beclin-1-like protein	NA	NA
XP_029731075	APHAG	LOC109409885	serine/threonine-protein kinase ULK2	NA	NA
XP_029731399	APHAG	LOC109622215	autophagy protein 5	NA	NA
XP_029731524	APHAG	LOC115267930	autophagy protein 5-like	NA	NA
XP_029731587	APHAG	LOC109410749	ubiquitin-like-conjugating enzyme ATG3	NA	NA
XP_029735841	APHAG	LOC109408400	autophagy-related protein 9A-like	NA	NA
XP_019532058	BGBP	LOC109403683	Beta-1 3-glucan-binding protein-like	NA	NA
XP_019533384	BGBP	LOC109404882	Beta-1 3-glucan-binding protein-like	NA	NA
XP_019543897	BGBP	LOC109414513	Beta-1 3-glucan-binding protein-like	NA	NA
XP_019556819	BGBP	LOC109425899	Beta-1 3-glucan-binding protein-like	NA	NA
XP_019560574	BGBP	LOC109429164	Beta-1 3-glucan-binding protein-like	NA	NA
XP_019560575	BGBP	LOC109429165	Beta-1 3-glucan-binding protein-like	NA	NA
XP_019560576	BGBP	LOC109429166	Beta-1 3-glucan-binding protein-like	NA	NA
XP_019933420	BGBP	LOC109623322	Beta-1 3-glucan-binding protein-like	NA	NA
XP_029720843	BGBP	LOC109426906	Beta-1 3-glucan-binding protein-like	NA	NA
XP_029720849	BGBP	LOC109426907	Beta-1 3-glucan-binding protein-like	NA	NA
XP_029728560	BGBP	LOC109404840	Beta-1 3-glucan-binding protein-like	NA	NA
XP_029728570	BGBP	LOC115266475	Beta-1 3-glucan-binding protein-like	NA	NA
XP_029735103	BGBP	LOC109407966	Beta-1 3-glucan-binding protein-like	NA	NA
XP_029730094	CASPA	LOC109402653	uncharacterized LOC109402653	NA	NA
XP_029730679	CASPA	LOC109432245	uncharacterized LOC109432245	NA	NA
XP_029731030	CASPA	LOC115253597	uncharacterized LOC115253597	NA	NA
XP_019528553	CASP	LOC109400467	caspase-like	NA	NA
XP_019529649	CASP	LOC109401535	caspase-3-like	NA	NA
XP_019541227	CASP	LOC109412040	caspase Dronc	NA	NA
XP_019541780	CASP	LOC109412613	caspase-3	NA	NA
XP_019559113	CASP	LOC109427926	caspase-1-like	LOC115266369	NA
XP_019559154	CASP	LOC109427949	caspase	NA	NA
XP_019559501	CASP	LOC109428244	caspase-1-like	NA	NA
XP_019559508	CASP	LOC109428245	caspase-1-like	NA	NA
XP_019559545	CASP	LOC109428267	caspase-like	NA	NA
XP_019559684	CASP	LOC109428408	caspase-1-like	NA	NA
XP_029709872*	CASP	LOC109399676	caspase-like	LOC109400467	LOC109400467
XP_029711624	CASP	LOC115256800	caspase-7-like	NA	NA
XP_029711625	CASP	LOC115256801	caspase-7-like	LOC115269146	LOC115269146
XP_029711626	CASP	LOC115256802	caspase-1-like	NA	NA
XP_029717890	CASP	LOC109431512	caspase-like	NA	NA
XP_029721277	CASP	LOC115262725	caspase-8-like	NA	NA
XP_029724525	CASP	LOC115264686	caspase-3-like	NA	NA
XP_029728358	CASP	LOC109427925	caspase-like	NA	NA
XP_029728448	CASP	LOC115266369	caspase-1-like	NA	NA
XP_029728450	CASP	LOC115253749	caspase-1-like	LOC109427925, LOC115253750	LOC109427925, LOC115253750
XP_029733416	CASP	LOC115269146	uncharacterized LOC115269146	NA	NA
XP_029733417	CASP	LOC115269147	caspase-1-like	NA	NA
XP_029736315	CASP	LOC115271029	caspase-1-like	LOC109428245	LOC109428245
XP_019562520	CAT	LOC109430890	catalase	NA	NA
XP_019529156	CLIP	LOC109401133	proclotting enzyme-like	NA	NA
XP_019530151	CLIP	LOC109401989	CLIP domain-containing serine protease B15-like	NA	NA
XP_019530266	CLIP	LOC109402100	venom protease	NA	NA
XP_019530698	CLIP	LOC109402465	CLIP domain-containing serine protease 2-like	NA	NA
XP_019531231	CLIP	LOC109402947	serine protease grass-like	LOC109416077	LOC109416077
XP_019531239	CLIP	LOC109402953	uncharacterized LOC109402953	NA	NA
XP_019531242	CLIP	LOC109402955	serine protease grass-like	NA	NA
XP_019533175	CLIP	LOC109404704	serine protease persephone	NA	NA
XP_019534515	CLIP	LOC109405908	phenoloxidase-activating factor 3-like	NA	NA
XP_019535837	CLIP	LOC109407295	phenoloxidase-activating factor 3-like	NA	NA
XP_019537958	CLIP	LOC109409006	transmembrane protease serine 9-like	NA	NA
XP_019537987	CLIP	LOC109409026	venom serine protease Bi-VSP	NA	NA
XP_019538453	CLIP	LOC109409467	serine protease Hayan-like	NA	NA
XP_019538455	CLIP	LOC109409468	serine protease Hayan	NA	NA
XP_019538517	CLIP	LOC109409534	serine protease persephone-like	NA	NA
XP_019542191	CLIP	LOC109412988	serine protease persephone-like	LOC109409534	LOC109409534
XP_019542192	CLIP	LOC109412989	serine protease Hayan-like	LOC109409468	LOC109409468
XP_019543152	CLIP	LOC109413881	CLIP domain-containing serine protease B15-like	NA	NA
XP_019543153	CLIP	LOC109413882	CLIP domain-containing serine protease B15-like	NA	NA
XP_019544289	CLIP	LOC109414897	melanization protease 1	NA	NA
XP_019544685	CLIP	LOC109415245	phenoloxidase-activating factor 1-like	NA	NA
XP_019545539	CLIP	LOC109416028	serine protease easter-like	NA	NA
XP_019545595	CLIP	LOC109416083	uncharacterized LOC109416083	NA	NA
XP_019547475	CLIP	LOC109417777	uncharacterized LOC109417777	NA	NA
XP_019549327	CLIP	LOC109419569	phenoloxidase-activating factor 3	NA	NA
XP_019550188	CLIP	LOC109420317	serine protease 7-like	NA	NA
XP_019551990	CLIP	LOC109421873	CLIP domain-containing serine protease B15-like	NA	NA
XP_019555537	CLIP	LOC109424806	phenoloxidase-activating factor 1-like	NA	NA
XP_019555538	CLIP	LOC109424807	serine protease easter-like	LOC115264218	NA
XP_019555564	CLIP	LOC109424827	serine protease easter-like	NA	NA
XP_019556104	CLIP	LOC109425319	melanization protease 1-like	NA	NA
XP_019557721	CLIP	LOC109426652	uncharacterized LOC109426652	NA	NA
XP_019559140	CLIP	LOC109427940	CLIP domain-containing serine protease B15	NA	NA
XP_019559532	CLIP	LOC109428258	CLIP domain-containing serine protease B15-like	NA	NA
XP_019561948	CLIP	LOC109430345	phenoloxidase-activating factor 1-like	NA	NA
XP_019931729	CLIP	LOC109621971	transmembrane protease serine 9-like	NA	NA
XP_029708519	CLIP	LOC115254969	uncharacterized LOC115254969	NA	NA
XP_029708536	CLIP	LOC109402120	uncharacterized LOC109402120	NA	NA
XP_029708716	CLIP	LOC109420638	uncharacterized LOC109420638	NA	NA
XP_029709049	CLIP	LOC115255244	uncharacterized LOC115255244	NA	NA
XP_029709053	CLIP	LOC115255246	plasminogen-like	NA	NA
XP_029709058	CLIP	LOC115255251	plasminogen-like	NA	NA
XP_029709062	CLIP	LOC109419400	serine proteinase stubble	NA	NA
XP_029709070	CLIP	LOC115253681	serine proteinase stubble-like	LOC109419400	NA
XP_029709073	CLIP	LOC115255260	plasminogen-like	NA	NA
XP_029709074	CLIP	LOC115255261	uncharacterized LOC115255261	NA	NA
XP_029709463	CLIP	LOC115255479	uncharacterized LOC115255479	NA	NA
XP_029710148	CLIP	LOC109428261	CLIP domain-containing serine protease B15-like	NA	NA
XP_029710310	CLIP	LOC109419399	plasminogen	NA	NA
XP_029711305	CLIP	LOC115253466	serine protease Hayan-like	NA	NA
XP_029711324	CLIP	LOC109427449	CLIP domain-containing serine protease 2-like	NA	NA
XP_029711391	CLIP	LOC115256661	serine protease persephone-like	NA	NA
XP_029712830	CLIP	LOC109430290	uncharacterized LOC109430290	NA	NA
XP_029713068	CLIP	LOC109430124	serine protease 7-like	NA	NA
XP_029713307	CLIP	LOC115257625	uncharacterized LOC115257625	NA	NA
XP_029713667	CLIP	LOC115257851	phenoloxidase-activating factor 2-like	LOC115257473	LOC115257473
XP_029714408	CLIP	LOC109414876	serine protease easter-like	NA	NA
XP_029714751	CLIP	LOC109419086	venom protease-like	NA	NA
XP_029714775	CLIP	LOC109419553	phenoloxidase-activating factor 3-like	NA	NA
XP_029716802	CLIP	LOC115260072	phenoloxidase-activating factor 2-like	NA	NA
XP_029716806	CLIP	LOC109429222	phenoloxidase-activating factor 2-like	LOC115260072	LOC115260072
XP_029716922	CLIP	LOC115260154	serine proteinase stubble-like	NA	NA
XP_029716941	CLIP	LOC115260172	proclotting enzyme-like	NA	NA
XP_029718114	CLIP	LOC109409284	phenoloxidase-activating factor 3-like	NA	NA
XP_029718115	CLIP	LOC109409282	phenoloxidase-activating factor 3-like	NA	NA
XP_029718133	CLIP	LOC109409374	phenoloxidase-activating factor 3-like	NA	NA
XP_029718228	CLIP	LOC109416072	serine protease grass-like	NA	NA
XP_029718230	CLIP	LOC109402912	serine protease grass-like	NA	NA
XP_029718741	CLIP	LOC115261357	phenoloxidase-activating factor 2-like	NA	NA
XP_029718822	CLIP	LOC109416020	serine protease easter-like	NA	NA
XP_029718851	CLIP	LOC109429144	protein masquerade	NA	NA
XP_029719044	CLIP	LOC109404466	phenoloxidase-activating factor 2-like	NA	NA
XP_029719133	CLIP	LOC109406308	phenoloxidase-activating factor 2-like	NA	NA
XP_029719389	CLIP	LOC109429147	uncharacterized LOC109429147	NA	NA
XP_029719797	CLIP	LOC109412847	uncharacterized LOC109412847	NA	NA
XP_029722717	CLIP	LOC109430356	serine protease easter-like	NA	NA
XP_029722919	CLIP	LOC109430321	serine protease 7-like	NA	NA
XP_029722923	CLIP	LOC109412418	phenoloxidase-activating factor 1	NA	NA
XP_029723393	CLIP	LOC109407483	uncharacterized LOC109407483	NA	NA
XP_029723485	CLIP	LOC109416077	serine protease grass	NA	NA
XP_029723486	CLIP	LOC115264186	serine protease grass-like	NA	NA
XP_029723493	CLIP	LOC109416080	serine protease grass-like	NA	NA
XP_029723494	CLIP	LOC109416105	serine protease grass-like	NA	NA
XP_029723495	CLIP	LOC115253771	serine protease grass-like	NA	NA
XP_029723583	CLIP	LOC115264218	serine protease easter-like	NA	NA
XP_029723855	CLIP	LOC109416100	CUB and peptidase domain-containing protein 1-like	NA	NA
XP_029723870	CLIP	LOC115264345	serine protease grass-like	NA	NA
XP_029724971	CLIP	LOC115264943	transmembrane protease serine 9-like	NA	NA
XP_029725152	CLIP	LOC109409339	venom protease-like	NA	NA
XP_029727948	CLIP	LOC109422672	proclotting enzyme-like	NA	NA
XP_029728338	CLIP	LOC109427943	CLIP domain-containing serine protease B15-like	NA	NA
XP_029728350	CLIP	LOC109427932	CLIP domain-containing serine protease B15-like	NA	NA
XP_029729398	CLIP	LOC115266916	venom protease-like	NA	NA
XP_029730076	CLIP	LOC109409024	protein masquerade-like	NA	NA
XP_029730650	CLIP	LOC115253701	serine protease 7-like	NA	NA
XP_029731286	CLIP	LOC109416024	serine protease easter-like	NA	NA
XP_029731289	CLIP	LOC109416023	serine protease easter-like	NA	NA
XP_029733231	CLIP	LOC109404727	serine protease persephone-like	LOC115269107	LOC115269107
XP_029733238	CLIP	LOC115254222	serine protease persephone-like	NA	NA
XP_029733239	CLIP	LOC109404721	serine protease persephone-like	NA	NA
XP_029733296	CLIP	LOC109397206	serine protease persephone	NA	NA
XP_029733297	CLIP	LOC115269088	serine protease persephone-like	NA	NA
XP_029733374	CLIP	LOC115269107	serine protease persephone-like	NA	NA
XP_029734463	CLIP	LOC109409507	serine protease persephone-like	NA	NA
XP_029736102	CLIP	LOC115270904	phenoloxidase-activating factor 3-like	NA	NA
XP_029736110	CLIP	LOC115270913	CLIP domain-containing serine protease B15-like	NA	NA
XP_029736114	CLIP	LOC115270916	CLIP domain-containing serine protease B15-like	NA	NA
XP_029736127	CLIP	LOC115270926	CLIP domain-containing serine protease B15-like	NA	NA
XP_029736129	CLIP	LOC109401985	CLIP domain-containing serine protease B15-like	NA	NA
XP_029736132	CLIP	LOC109413880	CLIP domain-containing serine protease B15-like	NA	NA
XP_029736134	CLIP	LOC109401983	CLIP domain-containing serine protease B15-like	NA	NA
XP_029736244	CLIP	LOC109397636	phenoloxidase-activating factor 2-like	NA	NA
XP_029736256	CLIP	LOC115271007	serine proteinase stubble-like	NA	NA
XP_029736285	CLIP	LOC115271016	serine protease persephone-like	NA	NA
XP_029736286	CLIP	LOC109413017	serine protease persephone-like	LOC109409507	NA
XP_029736287	CLIP	LOC115271017	phenoloxidase-activating factor 3-like	NA	NA
XP_029736293	CLIP	LOC109412990	phenoloxidase-activating factor 3-like	NA	NA
XP_029736295	CLIP	LOC109409469	phenoloxidase-activating factor 3-like	NA	NA
XP_019525930	CTL	LOC109398031	chymotrypsin-like protease CTRL-1	NA	NA
XP_019525991	CTL	LOC109398083	C-type lectin 37Db-like	NA	NA
XP_019525992	CTL	LOC109398084	transmembrane protease serine 2	NA	NA
XP_019528444	CTL	LOC109400393	perlucin-like protein	NA	NA
XP_019528477	CTL	LOC109400424	perlucin-like	NA	NA
XP_019530296	CTL	LOC109402129	collectin-10	NA	NA
XP_019530865	CTL	LOC109402623	perlucin	NA	NA
XP_019531852	CTL	LOC109403479	uncharacterized LOC109403479	NA	NA
XP_019534653	CTL	LOC109406040	alpha-N-acetylgalactosamine-specific lectin	NA	NA
XP_019539759	CTL	LOC109410676	C-type lectin 37Db-like	NA	NA
XP_019539978	CTL	LOC109410907	uncharacterized LOC109410907	NA	NA
XP_019541733	CTL	LOC109412555	C-type lectin 37Da-like	NA	NA
XP_019550151	CTL	LOC109420276	low affinity immunoglobulin epsilon Fc receptor-like	NA	NA
XP_019550727	CTL	LOC109420723	L-selectin	NA	NA
XP_019550779	CTL	LOC109420766	lectin subunit alpha-like	NA	NA
XP_019550780	CTL	LOC109420761	lectin subunit alpha-like	NA	NA
XP_019552234	CTL	LOC109422055	sushi EGF and pentraxin domain-containing protein 1	NA	NA
XP_019553281	CTL	LOC109422845	perlucin	NA	NA
XP_019557176	CTL	LOC109426188	coagulation factor IX-like	LOC109398084	NA
XP_019557186	CTL	LOC109426197	C-type lectin 37Db-like	NA	NA
XP_019557259	CTL	LOC109426246	chymotrypsin-like protease CTRL-1	NA	NA
XP_019557309	CTL	LOC109426308	perlucin-like protein	NA	NA
XP_019565642	CTL	LOC109433642	uncharacterized LOC109433642	NA	NA
XP_019931003	CTL	LOC109621427	C-type lectin 37Da-like	NA	NA
XP_019931077	CTL	LOC109621489	perlucin-like	NA	NA
XP_019931078	CTL	LOC109621490	C-type lectin 37Da-like	NA	NA
XP_019932676	CTL	LOC109622702	lectin subunit alpha-like	NA	NA
XP_029710799	CTL	LOC109422059	uncharacterized LOC109422059	NA	NA
XP_029711011	CTL	LOC115256492	perlucin-like protein	NA	NA
XP_029711419	CTL	LOC115256670	uncharacterized LOC115256670	NA	NA
XP_029711507	CTL	LOC115256712	uncharacterized LOC115256712	NA	NA
XP_029711850	CTL	LOC109424611	uncharacterized LOC109424611	NA	NA
XP_029711961	CTL	LOC109407380	uncharacterized LOC109407380	NA	NA
XP_029713834	CTL	LOC115257991	perlucin-like	NA	NA
XP_029713944	CTL	LOC115258082	uncharacterized LOC115258082	NA	NA
XP_029714167	CTL	LOC115258235	perlucin-like protein	NA	NA
XP_029714168	CTL	LOC115258237	perlucin-like protein	NA	NA
XP_029714392	CTL	LOC115258436	perlucin-like	NA	NA
XP_029714393	CTL	LOC115258437	C-type lectin 37Db-like	NA	NA
XP_029714394	CTL	LOC115258438	perlucin-like	NA	NA
XP_029716165	CTL	LOC115259586	perlucin-like	NA	NA
XP_029716166*	CTL	LOC115259587	perlucin-like	LOC115259586	LOC115259767, LOC115259586
XP_029716355	CTL	LOC115259718	C-type lectin 37Db-like	NA	NA
XP_029716419	CTL	LOC115259767	perlucin-like	NA	NA
XP_029721225	CTL	LOC109427308	uncharacterized LOC109427308	NA	NA
XP_029723948	CTL	LOC115264419	uncharacterized LOC115264419	NA	NA
XP_029724994	CTL	LOC115264948	lectin subunit alpha-like	NA	NA
XP_029725362	CTL	LOC109430993	uncharacterized LOC109430993	NA	NA
XP_029727317	CTL	LOC115265617	uncharacterized LOC115265617	NA	NA
XP_029727549	CTL	LOC109397320	low affinity immunoglobulin epsilon Fc receptor-like	NA	NA
XP_029730572	CTL	LOC109398030	collectin-10-like	NA	NA
XP_029730623	CTL	LOC109411141	uncharacterized LOC109411141	NA	NA
XP_029730636	CTL	LOC109426181	C-type lectin-like	NA	NA
XP_029731685	CTL	LOC115267974	perlucin-like	NA	NA
XP_029731694	CTL	LOC115267977	perlucin-like	NA	NA
XP_029731695	CTL	LOC115267978	C-type lectin 37Db-like	LOC109410676	NA
XP_029731696	CTL	LOC115267979	perlucin-like	NA	NA
XP_029732103	CTL	LOC115268191	perlucin-like	NA	NA
XP_029732213	CTL	LOC109411420	perlucin-like protein	NA	NA
XP_029732230	CTL	LOC115268351	perlucin-like	NA	NA
XP_029732231	CTL	LOC115268352	perlucin-like	NA	NA
XP_029732517	CTL	LOC109417976	uncharacterized LOC109417976	NA	NA
XP_029732526	CTL	LOC115268558	uncharacterized LOC115268558	NA	NA
XP_029734478	CTL	LOC109621428	C-type lectin 37Da-like	NA	NA
XP_029734582	CTL	LOC115269919	C-type lectin BfL-2-like	NA	NA
XP_029735958	CTL	LOC109401001	uncharacterized LOC109401001	NA	NA
XP_019528089	FREP	LOC109400072	microfibril-associated glycoprotein 4-like	NA	NA
XP_019532176	FREP	LOC109403760	microfibril-associated glycoprotein 4-like	NA	NA
XP_019536484	FREP	LOC109407763	fibrinogen-like protein A	NA	NA
XP_019536944	FREP	LOC109408162	microfibril-associated glycoprotein 4	NA	NA
XP_019539271	FREP	LOC109410204	angiopoietin-2	NA	NA
XP_019539626	FREP	LOC109410549	microfibril-associated glycoprotein 4-like	NA	NA
XP_019539651	FREP	LOC109410574	ficolin-3-like	NA	NA
XP_019539661	FREP	LOC109410594	angiopoietin-4	NA	NA
XP_019540095	FREP	LOC109411104	microfibril-associated glycoprotein 4-like	NA	NA
XP_019540446	FREP	LOC109411377	ficolin-2-like	NA	NA
XP_019542389	FREP	LOC109413124	fibrinogen-like protein A	NA	NA
XP_019546605	FREP	LOC109416944	ficolin-1-like	NA	NA
XP_019546608	FREP	LOC109416948	microfibril-associated glycoprotein 4-like	NA	NA
XP_019548691	FREP	LOC109418932	fibrinogen-like protein A	NA	NA
XP_019551173	FREP	LOC109421136	ficolin-3-like	LOC115267456	LOC115267456
XP_019551176	FREP	LOC109421140	ficolin-3-like	NA	NA
XP_019551179	FREP	LOC109421142	microfibril-associated glycoprotein 4-like	NA	NA
XP_019551843	FREP	LOC109421764	angiopoietin-related protein 1-like	NA	NA
XP_019555383	FREP	LOC109424669	angiopoietin-related protein 1-like	NA	NA
XP_019558100	FREP	LOC109426996	ficolin-2-like	NA	NA
XP_019558940	FREP	LOC109427771	fibroleukin-like	NA	NA
XP_019561842	FREP	LOC109430246	microfibril-associated glycoprotein 4-like	NA	NA
XP_019562113	FREP	LOC109430506	angiopoietin-related protein 2-like	NA	NA
XP_019562608	FREP	LOC109430947	protein scabrous	NA	NA
XP_019564507	FREP	LOC109432607	microfibril-associated glycoprotein 4-like	NA	NA
XP_019931245	FREP	LOC109621611	microfibril-associated glycoprotein 4-like	NA	NA
XP_029708119	FREP	LOC115254643	ficolin-3-like	NA	NA
XP_029714500	FREP	LOC109417515	uncharacterized LOC109417515	NA	NA
XP_029715936	FREP	LOC109421134	microfibril-associated glycoprotein 4-like	NA	NA
XP_029717583	FREP	LOC115260641	fibrinogen-like protein A	NA	NA
XP_029717961	FREP	LOC109402720	ficolin-2	NA	NA
XP_029718455	FREP	LOC115261221	angiopoietin-2-like	NA	NA
XP_029719818	FREP	LOC109415861	ficolin-2-like	NA	NA
XP_029721902	FREP	LOC115263125	ficolin-1-like	NA	NA
XP_029721948	FREP	LOC115263162	protein scabrous-like	NA	NA
XP_029722966	FREP	LOC109430387	angiopoietin-1-like	NA	NA
XP_029726462	FREP	LOC115265443	ficolin-2-like	NA	NA
XP_029726692	FREP	LOC115265485	ficolin-3-like	NA	NA
XP_029728592	FREP	LOC115266493	ficolin-2-like	NA	NA
XP_029730304	FREP	LOC115267447	microfibril-associated glycoprotein 4-like	NA	NA
XP_029730305	FREP	LOC109410548	ficolin-3-like	NA	NA
XP_029730307	FREP	LOC115267456	ficolin-3-like	NA	NA
XP_029730309	FREP	LOC109421135	angiopoietin-4-like	NA	NA
XP_029730932	FREP	LOC109409872	angiopoietin-related protein 6-like	NA	NA
XP_029732194	FREP	LOC115254208	angiopoietin-4-like	NA	NA
XP_029732195	FREP	LOC115268303	microfibril-associated glycoprotein 4-like	NA	NA
XP_029732196	FREP	LOC115268304	ficolin-3-like	NA	NA
XP_029732201	FREP	LOC115268309	microfibril-associated glycoprotein 4-like	NA	NA
XP_029732765	FREP	LOC109421668	ryncolin-1-like	NA	NA
XP_029733214	FREP	LOC115269051	angiopoietin-4-like	NA	NA
XP_029733342	FREP	LOC115269098	microfibril-associated glycoprotein 4-like	LOC109432607	LOC109432607
XP_029734386	FREP	LOC115269695	angiopoietin-4-like	NA	NA
XP_019525285	GALE	LOC109397420	galectin-4-like	NA	NA
XP_019525286	GALE	LOC109397421	galectin-4	NA	NA
XP_019536713	GALE	LOC109407960	galectin-6-like	NA	NA
XP_019539017	GALE	LOC109409956	galectin-8-like	NA	NA
XP_019541205	GALE	LOC109412016	galectin-6	NA	NA
XP_019541923	GALE	LOC109412765	galectin-4-like	NA	NA
XP_019541924	GALE	LOC109412766	galectin-4-like	NA	NA
XP_019545000	GALE	LOC109415571	galectin-4-like	NA	NA
XP_019559192	GALE	LOC109427990	galectin-12	NA	NA
XP_019559193	GALE	LOC109427991	uncharacterized LOC109427991	NA	NA
XP_019932570	GALE	LOC109622615	tectonin beta-propeller repeat-containing protein	NA	NA
XP_029731083	GALE	LOC109399101	galectin-9-like	NA	NA
XP_019530543	IAP	LOC109402332	baculoviral IAP repeat-containing protein 7-B	NA	NA
XP_019540538	IAP	LOC109411467	death-associated inhibitor of apoptosis 1	NA	NA
XP_019552149	IAP	LOC109421967	baculoviral IAP repeat-containing protein 5.2	NA	NA
XP_029710991	IAP	LOC115256482	baculoviral IAP repeat-containing protein 5.2-like	NA	NA
XP_029716189	IAP	LOC109411403	baculoviral IAP repeat-containing protein 6	NA	NA
XP_019530823	IMDPATH	LOC109402586	NF-kappa-B essential modulator-like	NA	NA
XP_019552790	IMDPATH	LOC109422464	fas-associated death domain protein-like	NA	NA
XP_019560044	IMDPATH	LOC109428687	fas-associated death domain protein	NA	NA
XP_019562305	IMDPATH	LOC109430681	protein immune deficiency	NA	NA
XP_029708839	IMDPATH	LOC109419873	inhibitor of nuclear factor kappa-B kinase subunit alpha-like	NA	NA
XP_029716149	IMDPATH	LOC109421877	mitogen-activated protein kinase kinase kinase 7-like	NA	NA
XP_029716158	IMDPATH	LOC109425252	mitogen-activated protein kinase kinase kinase 7	NA	NA
XP_029717613	IMDPATH	LOC115254050	mitogen-activated protein kinase kinase kinase 7-like	NA	NA
XP_029730723	IMDPATH	LOC109432676	beclin-1-like protein B	NA	NA
XP_029730726	IMDPATH	LOC109408777	histone-lysine N-methyltransferase SETD1B-like	NA	NA
XP_029734788	IMDPATH	LOC115254243	FAS-associated factor 1-like	NA	NA
XP_029734802	IMDPATH	LOC109402733	FAS-associated factor 1	LOC115254243	LOC115254243
XP_029735336	IMDPATH	LOC115270217	protein immune deficiency-like	NA	NA
XP_029735342	IMDPATH	LOC115270222	protein immune deficiency-like	NA	NA
XP_029735368	IMDPATH	LOC115270241	protein immune deficiency-like	LOC109430681, LOC115270217	LOC109430681
XP_029736333	IMDPATH	LOC115271052	inhibitor of nuclear factor kappa-B kinase subunit alpha-like	NA	NA
XP_029708892	JAKSTAT	LOC109419906	tyrosine-protein kinase hopscotch	NA	NA
XP_029710557	JAKSTAT	LOC109422192	signal transducer and transcription activator	NA	NA
XP_029728790	JAKSTAT	LOC109411151	cytokine receptor-like	NA	NA
XP_019527222	LYS	LOC109399239	lysozyme c-1-like	NA	NA
XP_019560056	LYS	LOC109428699	lysozyme-like	NA	NA
XP_019560431	LYS	LOC109429051	lysozyme c-1-like	NA	NA
XP_019562191	LYS	LOC109430577	lysozyme	LOC115269749	NA
XP_019931580	LYS	LOC109621842	uncharacterized LOC109621842	NA	NA
XP_029734419	LYS	LOC115269749	lysozyme-like	NA	NA
XP_029735634	LYS	LOC109424283	lysozyme	NA	NA
XP_019526282	ML	LOC109398392	mite group 2 allergen Gly d 2.02-like	NA	NA
XP_019530505	ML	LOC109402306	NPC intracellular cholesterol transporter 2-like	NA	NA
XP_019530506	ML	LOC109402307	NPC intracellular cholesterol transporter 2 homolog a-like	NA	NA
XP_019530507	ML	LOC109402309	NPC intracellular cholesterol transporter 2 homolog a-like	NA	NA
XP_019530564	ML	LOC109402349	NPC intracellular cholesterol transporter 2 homolog a-like	NA	NA
XP_019531777	ML	LOC109403403	NPC intracellular cholesterol transporter 2 homolog a	NA	NA
XP_019534793	ML	LOC109406193	uncharacterized LOC109406193	NA	NA
XP_019534802	ML	LOC109406203	uncharacterized LOC109406203	NA	NA
XP_019536382	ML	LOC109407685	MD-2-related lipid-recognition protein	NA	NA
XP_019536911	ML	LOC109408133	mite group 2 allergen Gly d 2.02-like	NA	NA
XP_019538413	ML	LOC109409426	mite group 2 allergen Gly d 2.02-like	NA	NA
XP_019548779	ML	LOC109419016	mite group 2 allergen Der p 2-like	NA	NA
XP_019548783	ML	LOC109419020	uncharacterized LOC109419020	NA	NA
XP_019548786	ML	LOC109419023	mite group 2 allergen Der f 2-like	NA	NA
XP_019550271	ML	LOC109420391	NPC intracellular cholesterol transporter 2-like	NA	NA
XP_019550272	ML	LOC109420394	NPC intracellular cholesterol transporter 2 homolog a-like	NA	NA
XP_019550311	ML	LOC109420426	NPC intracellular cholesterol transporter 2 homolog a-like	NA	NA
XP_019550312	ML	LOC109420427	NPC intracellular cholesterol transporter 2 homolog a	NA	NA
XP_019556862	ML	LOC109425930	MD-2-related lipid-recognition protein-like	NA	NA
XP_019561690	ML	LOC109430114	mite group 2 allergen Lep d 2-like	NA	NA
XP_029709767	ML	LOC115255784	mite group 2 allergen Lep d 2-like	NA	NA
XP_029712971	ML	LOC115257481	NPC intracellular cholesterol transporter 2 homolog a-like	NA	NA
XP_029713200	ML	LOC115257566	NPC intracellular cholesterol transporter 2 homolog a-like	NA	NA
XP_029713292	ML	LOC115257619	NPC intracellular cholesterol transporter 2-like	NA	NA
XP_029713310	ML	LOC115257627	NPC intracellular cholesterol transporter 2 homolog a-like	NA	NA
XP_029715522	ML	LOC109408131	mite group 2 allergen Der f 2-like	NA	NA
XP_029715529	ML	LOC115259156	uncharacterized LOC115259156	NA	NA
XP_029715533	ML	LOC109408134	uncharacterized LOC109408134	NA	NA
XP_029715534	ML	LOC115259161	mite group 2 allergen Gly d 2.02-like	NA	NA
XP_029716561	ML	LOC115259905	mite group 2 allergen Lep d 2-like	NA	NA
XP_029727384	ML	LOC109427594	NPC intracellular cholesterol transporter 1	NA	NA
XP_029727421	ML	LOC109621239	NPC intracellular cholesterol transporter 1	NA	NA
XP_029729273	ML	LOC115266806	mite group 2 allergen Lep d 2-like	NA	NA
XP_029729435	ML	LOC115266921	uncharacterized LOC115266921	NA	NA
XP_029733747	ML	LOC115253603	ecdysteroid-regulated 16 kDa protein-like	NA	NA
XP_029733753	ML	LOC109415297	ecdysteroid-regulated 16 kDa protein	NA	NA
XP_019525949	PGRP	LOC109398046	peptidoglycan-recognition protein SC1a	NA	NA
XP_019545007	PGRP	LOC109415577	peptidoglycan-recognition protein LE	NA	NA
XP_019552024	PGRP	LOC109421889	peptidoglycan-recognition protein SC2-like	NA	NA
XP_019552025	PGRP	LOC109421890	peptidoglycan-recognition protein SC2-like	NA	NA
XP_019553162	PGRP	LOC109422736	peptidoglycan-recognition protein LB-like	NA	NA
XP_019556312	PGRP	LOC109425513	peptidoglycan-recognition protein SC2-like	NA	NA
XP_019556323	PGRP	LOC109425525	peptidoglycan-recognition protein SC2-like	NA	NA
XP_019557095	PGRP	LOC109426115	peptidoglycan-recognition protein SC1a	NA	NA
XP_019562439*	PGRP	LOC109430816	peptidoglycan-recognition protein LC-like	NA	LOC115263198
XP_019562440	PGRP	LOC115253510	peptidoglycan-recognition protein LC-like	NA	NA
XP_019562448	PGRP	LOC109430819	peptidoglycan-recognition protein LA	NA	NA
XP_019563672	PGRP	LOC109431862	peptidoglycan-recognition protein LB	NA	NA
XP_019564851	PGRP	LOC109432952	peptidoglycan-recognition protein 2-like	NA	NA
XP_029716875	PGRP	LOC115260115	peptidoglycan-recognition protein LC-like	NA	NA
XP_029722026	PGRP	LOC115263198	peptidoglycan-recognition protein LC-like	NA	NA
XP_029722038	PGRP	LOC115263200	peptidoglycan-recognition protein LA-like	NA	NA
XP_029730605	PGRP	LOC115253668	peptidoglycan-recognition protein SC1a-like	LOC109398046	LOC109398046
XP_029734178	PGRP	LOC115269531	peptidoglycan-recognition protein 2-like	NA	NA
XP_019537452	PPO	LOC109408583	phenoloxidase 2-like	NA	NA
XP_019537455	PPO	LOC109408587	phenoloxidase 2-like	NA	NA
XP_019554435	PPO	LOC109423853	phenoloxidase 2-like	LOC115269621, LOC115270199	NA
XP_019554437	PPO	LOC109423856	phenoloxidase 2-like	NA	NA
XP_019554438	PPO	LOC109423857	phenoloxidase 2-like	NA	NA
XP_019554440	PPO	LOC109423858	phenoloxidase 2	NA	NA
XP_019563525	PPO	LOC109431713	phenoloxidase 1-like	NA	NA
XP_019563534	PPO	LOC109431716	phenoloxidase 2-like	NA	NA
XP_019932332	PPO	LOC109622447	phenoloxidase 2	NA	NA
XP_029716891	PPO	LOC115260125	phenoloxidase 2-like	NA	NA
XP_029730315	PPO	LOC109398090	uncharacterized LOC109398090	NA	NA
XP_029730333	PPO	LOC115267476	phenoloxidase 2-like	NA	NA
XP_029730431	PPO	LOC115267500	phenoloxidase 2-like	LOC115267476	NA
XP_029730432	PPO	LOC115267501	phenoloxidase 1-like	NA	NA
XP_029734309	PPO	LOC115269621	phenoloxidase 2-like	NA	NA
XP_029734409	PPO	LOC109408601	phenoloxidase 2-like	NA	NA
XP_029734508	PPO	LOC115269861	uncharacterized LOC115269861	NA	NA
XP_029734512	PPO	LOC115269863	uncharacterized LOC115269863	NA	NA
XP_029735311	PPO	LOC115253846	phenoloxidase 2-like	NA	NA
XP_029735312	PPO	LOC115270199	phenoloxidase 2-like	NA	NA
XP_029735313	PPO	LOC115270200	phenoloxidase 1-like	NA	NA
XP_029735315	PPO	LOC115270202	phenoloxidase 2-like	NA	NA
XP_029735316	PPO	LOC115270203	phenoloxidase 2-like	NA	NA
XP_019524832	PRDX	LOC109430623	uncharacterized LOC109430623	NA	NA
XP_019526387	PRDX	LOC109398465	uncharacterized LOC109398465	NA	NA
XP_019526999	PRDX	LOC109399008	chorion peroxidase	NA	NA
XP_019529895	PRDX	LOC109401758	glutathione peroxidase-like	NA	NA
XP_019529940	PRDX	LOC109401781	probable phospholipid hydroperoxide glutathione peroxidase	NA	NA
XP_019536309	PRDX	LOC109407623	peroxiredoxin 1	NA	NA
XP_019544703	PRDX	LOC109415281	chorion peroxidase	NA	NA
XP_019547370	PRDX	LOC109417721	uncharacterized LOC109417721	NA	NA
XP_019552122	PRDX	LOC109421941	peroxidase	NA	NA
XP_019558882	PRDX	LOC109427739	peroxidase	NA	NA
XP_019562615	PRDX	LOC109430954	peroxiredoxin-6	NA	NA
XP_019562886	PRDX	LOC109431146	peroxidase-like	NA	NA
XP_019932021	PRDX	LOC109622223	peroxiredoxin-6	NA	NA
XP_019932912	PRDX	LOC109622897	dual oxidase	NA	NA
XP_029710060	PRDX	LOC115255981	probable phospholipid hydroperoxide glutathione peroxidase	NA	NA
XP_029712013*	PRDX	LOC115256948	peroxiredoxin 1-like	LOC109407623	LOC109407623
XP_029714173	PRDX	LOC115258242	chorion peroxidase-like	NA	NA
XP_029714713	PRDX	LOC115258596	dual oxidase-like	NA	NA
XP_029715926	PRDX	LOC115259481	peroxidase	NA	NA
XP_029715941	PRDX	LOC109622683	uncharacterized LOC109622683	NA	NA
XP_029716156	PRDX	LOC109399009	chorion peroxidase	NA	NA
XP_029716187	PRDX	LOC109429357	chorion peroxidase-like	NA	NA
XP_029716203	PRDX	LOC109429341	chorion peroxidase	NA	NA
XP_029716874	PRDX	LOC115260114	chorion peroxidase-like	NA	NA
XP_029717242	PRDX	LOC109400699	peroxidasin-like	NA	NA
XP_029717908	PRDX	LOC109412192	peroxiredoxin-2	NA	NA
XP_029721958	PRDX	LOC115263169	peroxiredoxin-6-like	NA	NA
XP_029725869	PRDX	LOC109410014	peroxiredoxin-2	NA	NA
XP_029725911	PRDX	LOC109419663	uncharacterized LOC109419663	NA	NA
XP_029731407	PRDX	LOC115254201	peroxiredoxin-6-like	NA	NA
XP_029733779	PRDX	LOC109623211	chorion peroxidase-like	NA	NA
XP_029733783	PRDX	LOC115269315	chorion peroxidase-like	LOC109623211	LOC109623211
XP_029734792	PRDX	LOC115270016	peroxidasin-like	NA	NA
XP_029734839	PRDX	LOC109399373	peroxidasin	NA	NA
XP_029736271	PRDX	LOC109409480	probable phospholipid hydroperoxide glutathione peroxidase	NA	NA
XP_029736276	PRDX	LOC115253543	probable phospholipid hydroperoxide glutathione peroxidase	NA	NA
XP_019536711	REL	LOC109407961	nuclear factor NF-kappa-B p110 subunit-like	NA	NA
XP_019540829	REL	LOC109411712	embryonic polarity protein dorsal	NA	NA
XP_019550742	REL	LOC109420732	embryonic polarity protein dorsal-like	NA	NA
XP_029735100	REL	LOC115270140	nuclear factor NF-kappa-B p110 subunit-like	NA	NA
XP_019526049	SCR	LOC109398186	scavenger receptor class B member 1	NA	NA
XP_019533234	SCR	LOC109404755	sensory neuron membrane protein 2	NA	NA
XP_019544129	SCR	LOC109414754	lysyl oxidase homolog 2B-like	NA	NA
XP_019554001	SCR	LOC109423485	scavenger receptor class B member 1	NA	NA
XP_019555119	SCR	LOC109424450	protein croquemort-like	LOC115258689	NA
XP_019556976	SCR	LOC109426005	MAM and LDL-receptor class A domain-containing protein 2-like	NA	NA
XP_019557912	SCR	LOC109426828	neurotrypsin-like	NA	NA
XP_019564534	SCR	LOC109432625	protein peste-like	NA	NA
XP_019931364	SCR	LOC109621685	scavenger receptor class B member 1	NA	NA
XP_029708072	SCR	LOC115254601	dual specificity protein kinase splA-like	NA	NA
XP_029708083	SCR	LOC109422270	uncharacterized LOC109422270	NA	NA
XP_029713949	SCR	LOC109419246	protein peste	NA	NA
XP_029714867	SCR	LOC115258682	protein croquemort-like	NA	NA
XP_029714876	SCR	LOC115258689	protein croquemort-like	NA	NA
XP_029715697	SCR	LOC109424470	protein croquemort-like	NA	NA
XP_029715698	SCR	LOC109424474	protein croquemort-like	NA	NA
XP_029721389	SCR	LOC109427293	sensory neuron membrane protein 1	NA	NA
XP_029723139	SCR	LOC115263976	sensory neuron membrane protein 1-like	NA	NA
XP_029723586	SCR	LOC115264219	protein peste-like	NA	NA
XP_029728266	SCR	LOC109427093	uncharacterized LOC109427093	NA	NA
XP_029728402	SCR	LOC109400191	uncharacterized LOC109400191	NA	NA
XP_029728556	SCR	LOC109428028	protein bark beetle	NA	NA
XP_029728559	SCR	LOC115266465	protein bark beetle-like	NA	NA
XP_029730153	SCR	LOC109403614	lysyl oxidase homolog 2B-like	NA	NA
XP_029731802	SCR	LOC109426006	MAM and LDL-receptor class A domain-containing protein 1-like	NA	NA
XP_029731840	SCR	LOC115268055	MAM and LDL-receptor class A domain-containing protein 1-like	NA	NA
XP_029731841	SCR	LOC115268056	MAM and LDL-receptor class A domain-containing protein 2-like	NA	NA
XP_029733333	SCR	LOC115269096	protein peste-like	NA	NA
XP_019525851	SOD	LOC109397980	superoxide dismutase [Mn]	NA	NA
XP_019537847	SOD	LOC109408915	superoxide dismutase [Cu-Zn]	NA	NA
XP_019544173	SOD	LOC109414794	superoxide dismutase [Mn]	NA	NA
XP_019932534	SOD	LOC109622584	superoxide dismutase [Cu-Zn]	NA	NA
XP_029707750	SOD	LOC109424401	uncharacterized LOC109424401	NA	NA
XP_029715437	SOD	LOC109422303	superoxide dismutase [Cu-Zn]-like	NA	NA
XP_029717005	SOD	LOC115260213	superoxide dismutase [Mn]	NA	NA
XP_029730668	SOD	LOC109418651	superoxide dismutase [Mn]	NA	NA
XP_029736457	SOD	LOC115254269	superoxide dismutase [Mn]	NA	NA
XP_019531642	SPZ	LOC109403292	protein spaetzle	NA	NA
XP_019540913	SPZ	LOC109411759	protein spaetzle 4	NA	NA
XP_019542135	SPZ	LOC109412941	uncharacterized LOC109412941	NA	NA
XP_019555354	SPZ	LOC109424643	uncharacterized LOC109424643	NA	NA
XP_019565395	SPZ	LOC109433419	protein spaetzle-like	NA	NA
XP_029708907	SPZ	LOC109420729	protein spaetzle 3-like	NA	NA
XP_029708934	SPZ	LOC109419928	protein spaetzle 3	NA	NA
XP_029717721	SPZ	LOC115253687	uncharacterized LOC115253687	NA	NA
XP_029718352	SPZ	LOC115261123	protein spaetzle-like	NA	NA
XP_029721599	SPZ	LOC109422490	protein spaetzle 5-like	NA	NA
XP_029726742	SPZ	LOC109418097	neurotrophin 1	NA	NA
XP_029735441	SPZ	LOC109430646	uncharacterized LOC109430646	NA	NA
XP_029735992	SPZ	LOC109428644	protein spaetzle 5-like	NA	NA
XP_019528098	SRPN	LOC109400084	uncharacterized LOC109400084	NA	NA
XP_019536543	SRPN	LOC109407832	serpin-Z7	NA	NA
XP_019536545	SRPN	LOC109407835	leukocyte elastase inhibitor-like	NA	NA
XP_019536546	SRPN	LOC109407836	plasminogen activator inhibitor 1-like	NA	NA
XP_019536547	SRPN	LOC109407837	leukocyte elastase inhibitor-like	NA	NA
XP_019536550	SRPN	LOC109407839	leukocyte elastase inhibitor	NA	NA
XP_019536551	SRPN	LOC109407840	heterochromatin-associated protein MENT-like	NA	NA
XP_019537028	SRPN	LOC109408227	serine protease inhibitor 42Dd-like	NA	NA
XP_019538266	SRPN	LOC109409286	serine protease inhibitor 28Dc	NA	NA
XP_019539272	SRPN	LOC109410200	serine protease inhibitor 42Dd-like	NA	NA
XP_019539293	SRPN	LOC109410220	leukocyte elastase inhibitor-like	NA	NA
XP_019539618	SRPN	LOC109410539	ovalbumin-related protein X-like	NA	NA
XP_019542938	SRPN	LOC109413679	uncharacterized LOC109413679	NA	NA
XP_019543509	SRPN	LOC109414181	serine protease inhibitor 77Ba-like	NA	NA
XP_019549322	SRPN	LOC109419565	serine protease inhibitor 28Dc	NA	NA
XP_019549323	SRPN	LOC109419566	serine protease inhibitor 28Dc-like	LOC109409286	NA
XP_019553405	SRPN	LOC109422959	serine protease inhibitor 27A-like	NA	NA
XP_019553417	SRPN	LOC109422968	serine protease inhibitor 27A-like	NA	NA
XP_019553427	SRPN	LOC109422978	serine protease inhibitor 27A-like	NA	NA
XP_019553752	SRPN	LOC109423279	serpin B11-like	NA	NA
XP_019556514	SRPN	LOC109425685	serine protease inhibitor 27A	NA	NA
XP_019931268	SRPN	LOC109621626	uncharacterized LOC109621626	NA	NA
XP_019931377	SRPN	LOC109621694	antichymotrypsin-2-like	NA	NA
XP_029714422	SRPN	LOC109409278	serine protease inhibitor 28Dc-like	NA	NA
XP_029714428	SRPN	LOC109409281	serine protease inhibitor 28Dc-like	NA	NA
XP_029714840	SRPN	LOC109409352	serine protease inhibitor 28Dc-like	NA	NA
XP_029716920	SRPN	LOC115260153	serpin B11-like	NA	NA
XP_029718112	SRPN	LOC109409347	serine protease inhibitor 28Dc-like	NA	NA
XP_029718125	SRPN	LOC115260914	serine protease inhibitor 28Dc-like	NA	NA
XP_029718126	SRPN	LOC115260915	serine protease inhibitor 28Dc-like	NA	NA
XP_029718127	SRPN	LOC115253445	serine protease inhibitor 28Dc-like	NA	NA
XP_029718135	SRPN	LOC115260918	serine protease inhibitor 28Dc-like	NA	NA
XP_029718137	SRPN	LOC115260920	serine protease inhibitor 28Dc-like	NA	NA
XP_029723771	SRPN	LOC109427333	serine protease inhibitor 88Ea-like	NA	NA
XP_029726183	SRPN	LOC115265404	leukocyte elastase inhibitor-like	NA	NA
XP_029726185	SRPN	LOC109410421	serpin-Z7-like	NA	NA
XP_029727258	SRPN	LOC109413737	leukocyte elastase inhibitor-like	NA	NA
XP_029729817	SRPN	LOC115253656	glia-derived nexin-like	NA	NA
XP_029729818	SRPN	LOC115267116	serpin B5-like	NA	NA
XP_029729819	SRPN	LOC115267119	leukocyte elastase inhibitor-like	NA	NA
XP_029729821	SRPN	LOC115267120	serpin B5-like	NA	NA
XP_029729822	SRPN	LOC115267121	plasminogen activator inhibitor 1-like	NA	NA
XP_029729823	SRPN	LOC109407833	serine protease inhibitor 42Dd-like	NA	NA
XP_029729841	SRPN	LOC115267142	uncharacterized LOC115267142	NA	NA
XP_029731287	SRPN	LOC115267868	leukocyte elastase inhibitor-like	NA	NA
XP_029732543	SRPN	LOC115268571	serpin B9-like	NA	NA
NP_001339903	SRRP	LOC109403945	endoribonuclease Dicer	NA	NA
XP_019525907	SRRP	LOC109398020	DEAD-box ATP-dependent RNA helicase 20	NA	NA
XP_019529985	SRRP	LOC109401827	protein aubergine	NA	NA
XP_019531256	SRRP	LOC109402997	plasminogen activator inhibitor 1 RNA-binding protein-like	NA	NA
XP_019533080	SRRP	LOC109404625	protein aubergine	NA	NA
XP_019534701	SRRP	LOC109406097	plasminogen activator inhibitor 1 RNA-binding protein-like	NA	NA
XP_019541278	SRRP	LOC109412092	protein aubergine	LOC109401827	LOC109401827
XP_019546092	SRRP	LOC109416473	staphylococcal nuclease domain-containing protein 1	NA	NA
XP_019547188	SRRP	LOC109417569	ribonuclease 3-like	NA	NA
XP_019548302	SRRP	LOC109418548	probable ATP-dependent RNA helicase spindle-E	NA	NA
XP_019553263	SRRP	LOC109422824	protein aubergine-like	NA	NA
XP_019558659	SRRP	LOC109427546	synaptic functional regulator FMR1	NA	NA
XP_019563411	SRRP	LOC109431637	ATP-dependent RNA helicase dbp2-like	NA	NA
XP_029709661	SRRP	LOC109412093	protein aubergine	NA	NA
XP_029709663	SRRP	LOC109401826	protein aubergine-like	NA	NA
XP_029710462	SRRP	LOC115256327	synaptic functional regulator FMR1-like	NA	NA
XP_029711242	SRRP	LOC109433074	protein argonaute-3-like	NA	NA
XP_029711472	SRRP	LOC109411297	protein argonaute-3	NA	NA
XP_029713072	SRRP	LOC109413120	protein aubergine	NA	NA
XP_029713073	SRRP	LOC109418558	protein aubergine	NA	NA
XP_029713501	SRRP	LOC109413090	ATP-dependent RNA helicase dbp2	NA	NA
XP_029714086	SRRP	LOC109399472	probable RNA helicase armi	NA	NA
XP_029714091	SRRP	LOC109399484	DEAD-box ATP-dependent RNA helicase 20	NA	NA
XP_029714092	SRRP	LOC115254004	probable ATP-dependent RNA helicase DDX17	NA	NA
XP_029715249	SRRP	LOC109406841	RISC-loading complex subunit tarbp2-like	NA	NA
XP_029715543	SRRP	LOC109413113	probable ATP-dependent RNA helicase spindle-E	LOC109418548	LOC109418548
XP_029715551	SRRP	LOC109428898	ATP-dependent RNA helicase DDX42	NA	NA
XP_029716851	SRRP	LOC109424480	protein argonaute-2-like	NA	NA
XP_029717566	SRRP	LOC115260637	protein aubergine-like	NA	NA
XP_029717846	SRRP	LOC109431485	endoribonuclease Dcr-1-like	NA	NA
XP_029717928	SRRP	LOC109427687	endoribonuclease Dcr-1	NA	NA
XP_029721413	SRRP	LOC109413546	protein argonaute-2-like	NA	NA
XP_029721419	SRRP	LOC109425656	protein argonaute-2	NA	NA
XP_029722864	SRRP	LOC115263730	ATP-dependent RNA helicase dbp2-like	NA	NA
XP_029724486	SRRP	LOC109402884	probable ATP-dependent RNA helicase DDX46	NA	NA
XP_029724506	SRRP	LOC115254134	probable ATP-dependent RNA helicase DDX46	NA	NA
XP_029724542	SRRP	LOC109401542	probable ATP-dependent RNA helicase DDX46	NA	NA
XP_029724915	SRRP	LOC109415047	ATP-dependent RNA helicase vasa	NA	NA
XP_029724958	SRRP	LOC109621956	ATP-dependent RNA helicase vasa	NA	NA
XP_029727649	SRRP	LOC115265841	probable ATP-dependent RNA helicase DDX43	NA	NA
XP_029730043	SRRP	LOC115267274	ATP-dependent RNA helicase vasa-like	NA	NA
XP_029730158	SRRP	LOC109416367	ATP-dependent RNA helicase dbp2	NA	NA
XP_029730169	SRRP	LOC109430043	probable ATP-dependent RNA helicase DDX43	NA	NA
XP_029730421	SRRP	LOC115267498	ATP-dependent RNA helicase dbp2-like	NA	NA
XP_029732940	SRRP	LOC109399310	microprocessor complex subunit DGCR8	NA	NA
XP_029733679	SRRP	LOC115269266	protein argonaute-2	NA	NA
XP_029733900	SRRP	LOC115269373	synaptic functional regulator FMR1-like	NA	NA
XP_029734962	SRRP	LOC109404924	ATP-dependent RNA helicase dbp2	NA	NA
XP_029734967	SRRP	LOC115270105	ATP-dependent RNA helicase dbp2-like	NA	NA
XP_029735714	SRRP	LOC115270354	probable RNA helicase armi	NA	NA
XP_029735716	SRRP	LOC109398003	probable RNA helicase armi	NA	NA
XP_019549384	TEP	LOC109419609	CD109 antigen-like	NA	NA
XP_019563625	TEP	LOC109431814	CD109 antigen	NA	NA
XP_029708707	TEP	LOC109420622	CD109 antigen-like	NA	NA
XP_029708708	TEP	LOC115255076	CD109 antigen-like	NA	NA
XP_029708903	TEP	LOC115253722	CD109 antigen-like	LOC109419933, LOC109420733	NA
XP_029708938	TEP	LOC109420733	CD109 antigen-like	NA	NA
XP_019530479	TOLL	LOC109402284	toll-like receptor Tollo	NA	NA
XP_019530554	TOLL	LOC109402341	toll-like receptor Tollo	LOC109420424	LOC109420424
XP_019530857	TOLL	LOC109402615	protein toll-like	NA	NA
XP_019530875	TOLL	LOC109402627	protein toll-like	NA	NA
XP_019531767	TOLL	LOC109403397	toll-like receptor 7	NA	NA
XP_019550309	TOLL	LOC109420424	toll-like receptor Tollo	NA	NA
XP_019557038	TOLL	LOC109426051	toll-like receptor 6	NA	NA
XP_019557045	TOLL	LOC109426059	toll-like receptor Tollo	LOC115268014	LOC115268014
XP_029708405	TOLL	LOC109406617	protein toll-like	NA	NA
XP_029710631	TOLL	LOC109402620	protein toll-like	NA	NA
XP_029711922	TOLL	LOC109402626	protein toll-like	NA	NA
XP_029712785*	TOLL	LOC115257388	toll-like receptor 7	LOC115260806	LOC115260806
XP_029712786	TOLL	LOC115257389	toll-like receptor Tollo	NA	NA
XP_029714455	TOLL	LOC115258479	uncharacterized LOC115258479	NA	NA
XP_029716524	TOLL	LOC115259831	uncharacterized LOC115259831	NA	NA
XP_029716867	TOLL	LOC115260112	toll-like receptor 13	NA	NA
XP_029717967	TOLL	LOC115260806	toll-like receptor 7	NA	NA
XP_029721402	TOLL	LOC109413562	toll-like receptor 2	NA	NA
XP_029722127	TOLL	LOC109424175	toll-like receptor 13	NA	NA
XP_029725192	TOLL	LOC115265101	uncharacterized LOC115265101	NA	NA
XP_029727624	TOLL	LOC115265818	uncharacterized LOC115265818	NA	NA
XP_029729800	TOLL	LOC109415428	protein toll-like	NA	NA
XP_029731509	TOLL	LOC115267927	uncharacterized LOC115267927	NA	NA
XP_029731761	TOLL	LOC115268014	toll-like receptor Tollo	NA	NA
XP_029731818	TOLL	LOC115268044	toll-like receptor 6	NA	NA
XP_029734333	TOLL	LOC115269640	protein toll-like	NA	NA
XP_019537814	TOLLPATH	LOC109408899	myeloid differentiation primary response protein MyD88-like	NA	NA
XP_019541599	TOLLPATH	LOC109412409	interleukin-1 receptor-associated kinase 4-like	NA	NA
XP_019544898	TOLLPATH	LOC109415475	serine/threonine-protein kinase pelle-like	NA	NA
XP_019552351	TOLLPATH	LOC109422166	uncharacterized LOC109422166	NA	NA
XP_019559764	TOLLPATH	LOC109428455	TNF receptor-associated factor 5-like	NA	NA
XP_019561065	TOLLPATH	LOC109429544	NF-kappa-B inhibitor cactus	NA	NA
XP_029724161	TOLLPATH	LOC115264543	serine/threonine-protein kinase pelle-like	NA	NA
XP_029724520	TOLLPATH	LOC115264679	serine/threonine-protein kinase pelle-like	NA	NA
XP_029728604	TOLLPATH	LOC115254172	NF-kappa-B inhibitor cactus-like	NA	NA
XP_029728811	TOLLPATH	LOC115266575	myeloid differentiation primary response protein MyD88-like	NA	NA
