# Supplementary material for: Improved reference genome of the arboviral vector Aedes albopictus
Source: Genome Biol. 2020 Aug 26;21:215. doi: 10.1186/s13059-020-02141-w (PMC7448346; doi:10.1186/s13059-020-02141-w)
Supplement: Supplementary file 9 — Additional file 9: Metadata of sequenced dataset and read mapping analysis of Ae. albopictus transcripts. [file 13059_2020_2141_MOESM9_ESM.xlsx]

## Sheet: Sheet1
Additional file 9
Collection of Ae. albopictus samples across development along with corresponding STAR IDs used for subsequent analyses. Samples are characterized by the following labels: Embryo, diapause, instar larvae, pupae, PBM ovaries, NBF ovaries, PBM carcass, NBF carcass, male testes, male carcass. Read mapping statistics against Canu-alb for each sequenced sample are provided.
STAR ID	Sample name	Sample type	Order	input_reads	uniquely_mapped	splices_total	splices_annotated	GT_AG	GC_AG	AT_AC	non_canonical	mapped_to_multiple_loci	mapped_to_too_many_loci	chimeric_reads	mapped_total
19222	Embryo_0_1	Embryo	1	29,545,873	15,743,027	1,290,042	1,257,220	1,235,168	3.033	279	51.562	12,131,550	273.337	-	28,147,914
19019	Embryo_0_4	Embryo	2	29,737,923	15,350,558	1,284,043	1,253,161	1,232,089	2.944	307	48.703	12,352,875	420.965	-	28,124,398
19020	Embryo_4_8	Embryo	3	35,167,752	17,901,380	1,351,675	1,314,580	1,295,579	3.705	317	52.074	14,446,940	644.696	-	32,993,016
19084	Embryo_8_12	Embryo	4	35,129,732	18,503,841	1,228,016	1,191,254	1,173,978	4.274	394	49.37	13,694,636	684.391	-	32,882,868
19094	Embryo_12_16	Embryo	5	31,056,777	15,698,253	1,135,170	1,106,146	1,091,179	3.484	452	40.055	12,651,649	822.968	-	29,172,870
19021	Embryo_16_20	Embryo	6	30,679,903	15,847,479	1,172,083	1,143,560	1,126,631	3.058	332	42.062	12,411,056	478.335	-	28,736,870
19022	Embryo_20_24	Embryo	7	34,681,225	18,229,808	1,302,465	1,269,568	1,250,567	3.539	342	48.017	13,644,400	509.272	-	32,383,480
19023	Embryo_24_28	Embryo	8	34,345,217	17,950,738	1,270,106	1,238,084	1,219,801	3.74	370	46.195	13,529,887	566.468	-	32,047,093
19095	Embryo_28_32	Embryo	9	33,037,363	17,026,041	1,131,204	1,099,585	1,085,953	3.404	428	41.419	12,992,874	837.221	-	30,856,136
19096	Embryo_32_36	Embryo	10	33,783,763	17,050,675	1,188,764	1,159,346	1,144,363	3.419	441	40.541	13,462,957	1,142,293	-	31,655,925
19085	Embryo_36_40	Embryo	11	31,765,446	16,619,185	1,125,107	1,097,857	1,081,383	3.076	378	40.27	12,392,161	747.039	-	29,758,385
19024	Embryo_40_44	Embryo	12	33,084,844	17,699,265	1,084,388	1,054,175	1,042,290	3.298	414	38.386	12,368,057	456.363	-	30,523,685
19086	Embryo_44_48	Embryo	13	35,115,565	18,693,293	1,271,733	1,237,561	1,225,691	3.503	453	42.086	13,406,385	786.753	-	32,886,431
19087	Embryo_48_52	Embryo	14	34,638,486	17,148,400	1,322,404	1,289,393	1,273,129	3.581	494	45.2	14,231,116	1,147,789	-	32,527,305
19097	Embryo_52_56	Embryo	15	36,040,447	18,672,578	1,208,609	1,173,822	1,164,528	3.772	496	39.813	13,850,080	1,088,952	-	33,611,610
19216	Embryo_56_60	Embryo	16	31,723,350	15,312,564	1,151,416	1,121,116	1,111,637	3.289	387	36.103	13,129,174	1,312,659	-	29,754,397
19217	Embryo_60_64	Embryo	17	34,485,674	16,559,396	1,252,564	1,218,744	1,208,802	3.614	410	39.738	14,409,668	1,382,122	-	32,351,186
19218	Embryo_64_68	Embryo	18	36,051,279	18,733,969	1,243,896	1,209,976	1,196,571	3.66	468	43.197	13,961,726	1,021,690	-	33,717,385
19219	Embryo_68_72	Embryo	19	28,752,300	13,834,048	1,028,547	1,000,548	992.571	3.254	330	32.392	11,873,625	1,210,464	-	26,918,137
19220	diapause_0_1_wk	diapause	20	30,684,022	16,155,431	979.651	948.202	940.998	2.764	304	35.585	11,541,923	887.642	-	28,584,996
19221	diapause_1_2_wk	diapause	21	27,799,742	13,228,233	1,015,858	994.195	979.663	3.185	160	32.85	11,489,701	1,646,909	-	26,364,843
19225	diapause_2_3_wk	diapause	22	30,541,084	15,592,553	1,115,248	1,089,712	1,074,601	3.106	267	37.274	12,356,753	990.852	-	28,940,158
19226	diapause_3_4_wk	diapause	23	30,169,333	14,580,517	1,129,830	1,106,157	1,091,256	3.358	170	35.046	12,397,648	1,707,498	-	28,685,663
19077	1st_instar_larvae	instar_larvae	24	29,402,827	13,052,424	974.843	960.987	947.043	1.607	182	26.011	12,623,226	2,233,867	-	27,909,517
19078	2nd_instar_larvae	instar_larvae	25	32,723,970	14,972,263	1,100,145	1,073,554	1,060,572	3.201	211	36.161	13,936,200	1,807,282	-	30,715,745
19079	3rd_instar_larvae	instar_larvae	26	33,994,173	15,954,482	1,117,126	1,086,459	1,081,124	3.269	169	32.564	14,448,451	1,719,560	-	32,122,493
19080	4th_instar_larvae	instar_larvae	27	31,385,049	15,597,507	1,050,362	1,021,285	1,010,852	3.212	191	36.107	13,061,827	1,016,138	-	29,675,472
19076	pupae_female_early	pupae_female	28	38,536,229	20,204,804	1,300,722	1,257,654	1,244,133	4.121	369	52.099	14,949,830	985.903	-	36,140,537
19081	pupae_female_late	pupae_female	29	32,593,272	15,924,763	1,009,989	983.757	969.268	2.86	320	37.541	13,136,031	1,500,615	-	30,561,409
19090	pupae_male_early	pupae_male	30	35,518,568	15,351,121	1,230,034	1,191,043	1,182,957	5.26	221	41.596	16,010,627	2,035,534	-	33,397,282
19091	pupae_male_late	pupae_male	31	29,443,110	11,798,533	960.651	934.841	927.22	3.665	195	29.571	13,642,580	2,246,352	-	27,687,465
19088	NBF_Ovaries	NBF_Ovaries	32	34,407,504	18,158,411	1,444,001	1,405,595	1,381,568	3.791	355	58.287	13,880,559	520.062	-	32,559,032
19025	PBM_Ovaries_12hr	PBM_Ovaries	33	33,670,576	17,574,510	1,395,899	1,360,199	1,338,501	3.73	464	53.204	13,813,366	459.902	-	31,847,778
19026	PBM_Ovaries_24hr	PBM_Ovaries	34	33,472,196	17,957,457	1,344,410	1,305,978	1,285,475	3.39	332	55.213	13,493,008	275.389	-	31,725,854
19066	PBM_Ovaries_36hr	PBM_Ovaries	35	38,933,033	20,655,337	1,380,718	1,343,298	1,322,929	3.321	336	54.132	15,611,601	428.409	-	36,695,347
19067	PBM_Ovaries_48hr	PBM_Ovaries	36	41,814,855	22,219,427	1,633,862	1,587,544	1,567,259	3.6	389	62.614	17,143,451	236.895	-	39,599,773
19068	PBM_Ovaries_60hr	PBM_Ovaries	37	33,734,673	18,092,580	1,457,604	1,418,787	1,394,610	3.528	287	59.179	13,680,082	204.919	-	31,977,581
19069	PBM_Ovaries_72hr	PBM_Ovaries	38	36,270,967	19,315,307	1,570,849	1,529,319	1,503,862	3.801	377	62.809	14,783,248	239.406	-	34,337,961
19089	NBF_carcass	NBF_carcass	39	35,264,216	15,535,007	1,159,483	1,123,325	1,107,340	4.293	426	47.424	14,836,759	2,940,843	-	33,312,609
19070	PBM_carcass_12hr	PBM_carcass	40	37,015,423	21,478,170	1,233,118	1,203,678	1,192,329	2.575	528	37.686	12,282,803	995.167	-	34,756,140
19071	PBM_carcass_24hr	PBM_carcass	41	36,895,401	26,369,093	831.737	812.682	806.58	2.006	266	22.885	8,125,341	767.014	-	35,261,448
19072	PBM_carcass_36hr	PBM_carcass	42	38,915,318	20,016,773	1,423,194	1,387,315	1,376,444	4.613	944	41.193	15,230,544	1,245,636	-	36,492,953
19073	PBM_carcass_48hr	PBM_carcass	43	37,230,144	18,784,672	1,401,026	1,360,272	1,350,340	4.717	1.312	44.657	15,064,701	1,098,823	-	34,948,196
19074	PBM_carcass_60hr	PBM_carcass	44	27,878,188	12,809,009	917.833	893.94	885.609	2.88	845	28.499	12,071,671	1,401,930	-	26,282,610
19075	PBM_carcass_72hr	PBM_carcass	45	28,259,545	13,101,159	940.337	914.125	907.6	2.709	789	29.239	12,152,295	1,293,311	-	26,546,765
19223	male_testes	male_testes	46	27,652,426	13,581,983	1,082,322	1,019,200	1,044,862	3.37	297	33.793	11,476,853	1,088,649	-	26,147,485
19224	male_carcass	male_carcass	47	30,753,216	13,003,708	1,000,741	970.857	956.944	3.872	407	39.518	13,055,522	3,092,937	-	29,152,167
